# Supplementary material for: Model-based analysis of competing-endogenous pathways (MACPath) in human cancers
Source: PLoS Comput Biol. 2018 Mar 22;14(3):e1006074. doi: 10.1371/journal.pcbi.1006074 (PMC5882149; doi:10.1371/journal.pcbi.1006074)
Supplement: S1 Table — (XLSX) [file pcbi.1006074.s004.xlsx]

## Sheet: Readme
List of gained and lost cePathways in breast tumor vs. normal (2nd and 3rd tab)
P is canonical pathway for which θ values are calculated for
Q is pathway enriched in the ranked list of genes
ES is enrichment score
P value is nominal P value from permutation test
len(list) is the length of the ranked list
numCeRNA_normal is the number of ceRNAs between pathways identified in normal
numCeRNA_tumor is the number of ceRNAs between pathways identified in tumor
ceRNA number difference (normal vs. tumor)
Connectivity of gained/lost cePathways (4th and 5th tab)
Degree is the number of times the pathway occurrs in significantly gained/lost cePathways in tumors.
Norm_degree is the normalized degree for comparison (divided by the maximum possible degree in a simple graph n-1 where n is the number of nodes in G)

## Sheet: Gained cePathways
P	Q	ES	P value	len(list)	numCeRNA_normal	numCeRNA_tumor	ceRNA number difference (normal vs. tumor)
BIOCARTA_ACH_PATHWAY	REACTOME_SIGNALING_BY_RHO_GTPASES	0.667389	0	746	7	0	7
BIOCARTA_ACTINY_PATHWAY	KEGG_WNT_SIGNALING_PATHWAY	0.702409	0	744	57	3	54
BIOCARTA_ACTINY_PATHWAY	PID_MTOR_4PATHWAY	0.719042	0	744	31	3	28
BIOCARTA_ACTINY_PATHWAY	PID_P38_MK2PATHWAY	0.888308	0	744	6	1	5
BIOCARTA_AGPCR_PATHWAY	KEGG_UBIQUITIN_MEDIATED_PROTEOLYSIS	0.798903	0	428	14	1	13
BIOCARTA_AGPCR_PATHWAY	REACTOME_ADAPTIVE_IMMUNE_SYSTEM	0.693403	0	428	40	1	39
BIOCARTA_AGR_PATHWAY	KEGG_UBIQUITIN_MEDIATED_PROTEOLYSIS	0.6953	0	624	75	14	61
BIOCARTA_AKT_PATHWAY	PID_FOXOPATHWAY	0.981714	0	654	17	2	15
BIOCARTA_ALK_PATHWAY	PID_ERBB1_INTERNALIZATION_PATHWAY	0.801437	0	659	48	6	42
BIOCARTA_ALK_PATHWAY	REACTOME_SIGNALING_BY_RHO_GTPASES	0.601365	0	659	76	13	63
BIOCARTA_ARENRF2_PATHWAY	PID_MET_PATHWAY	0.619464	0	835	33	12	21
BIOCARTA_ARF_PATHWAY	KEGG_MELANOGENESIS	0.846114	0	797	10	0	10
BIOCARTA_AT1R_PATHWAY	KEGG_NEUROTROPHIN_SIGNALING_PATHWAY	0.623127	0	775	56	5	51
BIOCARTA_ATM_PATHWAY	KEGG_ENDOCYTOSIS	0.696927	0	612	20	2	18
BIOCARTA_ATRBRCA_PATHWAY	KEGG_UBIQUITIN_MEDIATED_PROTEOLYSIS	0.667354	0	504	18	5	13
BIOCARTA_ATRBRCA_PATHWAY	PID_PDGFRBPATHWAY	0.628629	0	504	22	2	20
BIOCARTA_BAD_PATHWAY	KEGG_WNT_SIGNALING_PATHWAY	0.890747	0	454	70	2	68
BIOCARTA_BARRESTIN_PATHWAY	BIOCARTA_ALK_PATHWAY	0.869646	0	697	5	0	5
BIOCARTA_BARRESTIN_PATHWAY	PID_RB_1PATHWAY	0.73785	0	697	2	0	2
BIOCARTA_BARRESTIN_SRC_PATHWAY	KEGG_ENDOCYTOSIS	0.732839	0	655	42	4	38
BIOCARTA_BCELLSURVIVAL_PATHWAY	BIOCARTA_CHREBP2_PATHWAY	0.850891	0	698	6	0	6
BIOCARTA_BCELLSURVIVAL_PATHWAY	KEGG_NEUROTROPHIN_SIGNALING_PATHWAY	0.678036	0	698	20	4	16
BIOCARTA_BCELLSURVIVAL_PATHWAY	PID_FOXOPATHWAY	0.787604	0	698	13	6	7
BIOCARTA_BCELLSURVIVAL_PATHWAY	PID_PDGFRBPATHWAY	0.646385	0	698	33	5	28
BIOCARTA_BCELLSURVIVAL_PATHWAY	PID_VEGFR1_2_PATHWAY	0.643495	0	698	16	7	9
BIOCARTA_CALCINEURIN_PATHWAY	KEGG_UBIQUITIN_MEDIATED_PROTEOLYSIS	0.70992	0	755	61	7	54
BIOCARTA_CARDIACEGF_PATHWAY	PID_SMAD2_3NUCLEARPATHWAY	0.649883	0	956	8	1	7
BIOCARTA_CARDIACEGF_PATHWAY	REACTOME_CIRCADIAN_CLOCK	0.745563	0	956	5	0	5
BIOCARTA_CARDIACEGF_PATHWAY	REACTOME_NGF_SIGNALLING_VIA_TRKA_FROM_THE_PLASMA_MEMBRANE	0.658791	0	956	7	1	6
BIOCARTA_CARM1_PATHWAY	KEGG_REGULATION_OF_ACTIN_CYTOSKELETON	0.697706	0	502	73	15	58
BIOCARTA_CARM_ER_PATHWAY	KEGG_FOCAL_ADHESION	0.6322	0	644	49	9	40
BIOCARTA_CARM_ER_PATHWAY	KEGG_WNT_SIGNALING_PATHWAY	0.70416	0	644	53	5	48
BIOCARTA_CARM_ER_PATHWAY	PID_ECADHERIN_NASCENTAJ_PATHWAY	0.713364	0	644	17	1	16
BIOCARTA_CARM_ER_PATHWAY	PID_EPHBFWDPATHWAY	0.829136	0	644	20	1	19
BIOCARTA_CARM_ER_PATHWAY	PID_PDGFRBPATHWAY	0.725073	0	644	52	8	44
BIOCARTA_CARM_ER_PATHWAY	REACTOME_NGF_SIGNALLING_VIA_TRKA_FROM_THE_PLASMA_MEMBRANE	0.65483	0	644	47	8	39
BIOCARTA_CARM_ER_PATHWAY	REACTOME_PLATELET_ACTIVATION_SIGNALING_AND_AGGREGATION	0.610621	0	644	37	3	34
BIOCARTA_CBL_PATHWAY	PID_SMAD2_3NUCLEARPATHWAY	0.654983	0	1203	20	3	17
BIOCARTA_CD40_PATHWAY	PID_MTOR_4PATHWAY	0.818875	0	693	9	0	9
BIOCARTA_CDC42RAC_PATHWAY	KEGG_MELANOGENESIS	0.646848	0	1133	24	2	22
BIOCARTA_CDC42RAC_PATHWAY	KEGG_NEUROTROPHIN_SIGNALING_PATHWAY	0.638043	0	1133	24	2	22
BIOCARTA_CDC42RAC_PATHWAY	KEGG_OOCYTE_MEIOSIS	0.635069	0	1133	23	4	19
BIOCARTA_CDK5_PATHWAY	PID_FAK_PATHWAY	0.625935	0	746	9	0	9
BIOCARTA_CDMAC_PATHWAY	KEGG_ENDOCYTOSIS	0.678852	0	620	38	4	34
BIOCARTA_CELLCYCLE_PATHWAY	KEGG_OOCYTE_MEIOSIS	0.807957	0	640	13	1	12
BIOCARTA_CELLCYCLE_PATHWAY	REACTOME_OPIOID_SIGNALLING	0.786979	0	640	7	1	6
BIOCARTA_CERAMIDE_PATHWAY	KEGG_ENDOCYTOSIS	0.706325	0	576	63	4	59
BIOCARTA_CHEMICAL_PATHWAY	KEGG_UBIQUITIN_MEDIATED_PROTEOLYSIS	0.781139	0	660	37	10	27
BIOCARTA_CHREBP2_PATHWAY	KEGG_AXON_GUIDANCE	0.723718	0	723	57	5	52
BIOCARTA_CHREBP2_PATHWAY	KEGG_UBIQUITIN_MEDIATED_PROTEOLYSIS	0.75478	0	723	82	8	74
BIOCARTA_CREB_PATHWAY	KEGG_REGULATION_OF_ACTIN_CYTOSKELETON	0.712725	0	530	89	15	74
BIOCARTA_CREB_PATHWAY	REACTOME_SIGNALING_BY_TGF_BETA_RECEPTOR_COMPLEX	0.81125	0	530	45	7	38
BIOCARTA_CSK_PATHWAY	KEGG_UBIQUITIN_MEDIATED_PROTEOLYSIS	0.74881	0	383	14	1	13
BIOCARTA_CTCF_PATHWAY	REACTOME_NGF_SIGNALLING_VIA_TRKA_FROM_THE_PLASMA_MEMBRANE	0.661188	0	647	57	10	47
BIOCARTA_CTCF_PATHWAY	REACTOME_PLATELET_ACTIVATION_SIGNALING_AND_AGGREGATION	0.607401	0	647	48	3	45
BIOCARTA_CTCF_PATHWAY	REACTOME_SIGNALLING_BY_NGF	0.657029	0	647	86	12	74
BIOCARTA_CXCR4_PATHWAY	KEGG_ENDOCYTOSIS	0.857281	0	571	55	5	50
BIOCARTA_D4GDI_PATHWAY	KEGG_NEUROTROPHIN_SIGNALING_PATHWAY	0.610768	0	580	20	6	14
BIOCARTA_DEATH_PATHWAY	REACTOME_NGF_SIGNALLING_VIA_TRKA_FROM_THE_PLASMA_MEMBRANE	0.611355	0	591	33	8	25
BIOCARTA_DNAFRAGMENT_PATHWAY	KEGG_AXON_GUIDANCE	0.640202	0	759	7	2	5
BIOCARTA_DNAFRAGMENT_PATHWAY	KEGG_UBIQUITIN_MEDIATED_PROTEOLYSIS	0.611927	0	759	11	2	9
BIOCARTA_DNAFRAGMENT_PATHWAY	KEGG_WNT_SIGNALING_PATHWAY	0.637486	0	759	6	2	4
BIOCARTA_DNAFRAGMENT_PATHWAY	PID_MTOR_4PATHWAY	0.669046	0	759	7	0	7
BIOCARTA_DNAFRAGMENT_PATHWAY	PID_P53REGULATIONPATHWAY	0.844233	0	759	4	1	3
BIOCARTA_ECM_PATHWAY	KEGG_ENDOCYTOSIS	0.63818	0	884	80	10	70
BIOCARTA_ECM_PATHWAY	PID_ERBB1_INTERNALIZATION_PATHWAY	0.694821	0	884	27	2	25
BIOCARTA_ECM_PATHWAY	REACTOME_NGF_SIGNALLING_VIA_TRKA_FROM_THE_PLASMA_MEMBRANE	0.681411	0	884	55	6	49
BIOCARTA_ECM_PATHWAY	REACTOME_SIGNALLING_BY_NGF	0.648455	0	884	91	8	83
BIOCARTA_EDG1_PATHWAY	KEGG_UBIQUITIN_MEDIATED_PROTEOLYSIS	0.654669	0	788	48	9	39
BIOCARTA_EGFR_SMRTE_PATHWAY	PID_THROMBIN_PAR1_PATHWAY	0.802362	0	520	6	0	6
BIOCARTA_EGF_PATHWAY	PID_EPHBFWDPATHWAY	0.85736	0	552	25	0	25
BIOCARTA_EIF2_PATHWAY	KEGG_UBIQUITIN_MEDIATED_PROTEOLYSIS	0.718908	0	711	30	2	28
BIOCARTA_EIF2_PATHWAY	PID_PI3KCIPATHWAY	0.777305	0	711	7	0	7
BIOCARTA_EIF4_PATHWAY	KEGG_ENDOCYTOSIS	0.623766	0	646	93	13	80
BIOCARTA_EIF4_PATHWAY	PID_PDGFRBPATHWAY	0.610866	0	646	71	8	63
BIOCARTA_EIF_PATHWAY	KEGG_TGF_BETA_SIGNALING_PATHWAY	0.705791	0	1098	27	1	26
BIOCARTA_EIF_PATHWAY	PID_HIF1_TFPATHWAY	0.666006	0	1098	9	1	8
BIOCARTA_ERK5_PATHWAY	PID_FAK_PATHWAY	0.68071	0	592	32	6	26
BIOCARTA_ERK_PATHWAY	KEGG_UBIQUITIN_MEDIATED_PROTEOLYSIS	0.679867	0	596	58	15	43
BIOCARTA_ERK_PATHWAY	PID_ERBB1_INTERNALIZATION_PATHWAY	0.737306	0	596	22	3	19
BIOCARTA_ERK_PATHWAY	REACTOME_SIGNALLING_BY_NGF	0.648218	0	596	70	3	67
BIOCARTA_ERYTH_PATHWAY	REACTOME_SIGNALING_BY_RHO_GTPASES	0.625405	0	460	2	0	2
BIOCARTA_ETC_PATHWAY	PID_ECADHERIN_NASCENTAJ_PATHWAY	0.642183	0	774	4	0	4
BIOCARTA_ETS_PATHWAY	KEGG_FOCAL_ADHESION	0.637004	0	633	31	4	27
BIOCARTA_ETS_PATHWAY	PID_EPHA_FWDPATHWAY	0.96726	0	633	7	1	6
BIOCARTA_ETS_PATHWAY	PID_FAK_PATHWAY	0.703084	0	633	20	2	18
BIOCARTA_ETS_PATHWAY	REACTOME_CTLA4_INHIBITORY_SIGNALING	0.910393	0	633	9	1	8
BIOCARTA_EXTRINSIC_PATHWAY	REACTOME_NGF_SIGNALLING_VIA_TRKA_FROM_THE_PLASMA_MEMBRANE	0.628073	0	537	0	0	0
BIOCARTA_FCER1_PATHWAY	KEGG_TGF_BETA_SIGNALING_PATHWAY	0.859395	0	698	67	4	63
BIOCARTA_FCER1_PATHWAY	KEGG_WNT_SIGNALING_PATHWAY	0.79481	0	698	83	7	76
BIOCARTA_FMLP_PATHWAY	KEGG_PATHWAYS_IN_CANCER	0.602057	0	815	84	6	78
BIOCARTA_G2_PATHWAY	KEGG_NEUROTROPHIN_SIGNALING_PATHWAY	0.606084	0	844	19	4	15
BIOCARTA_G2_PATHWAY	REACTOME_SIGNALING_BY_RHO_GTPASES	0.602328	0	844	17	3	14
BIOCARTA_GATA3_PATHWAY	ST_PHOSPHOINOSITIDE_3_KINASE_PATHWAY	0.938154	0	667	2	1	1
BIOCARTA_GH_PATHWAY	KEGG_NEUROTROPHIN_SIGNALING_PATHWAY	0.663103	0	624	20	3	17
BIOCARTA_GLEEVEC_PATHWAY	PID_EPHBFWDPATHWAY	0.870612	0	629	20	1	19
BIOCARTA_GSK3_PATHWAY	PID_MTOR_4PATHWAY	0.646437	0	590	32	8	24
BIOCARTA_HDAC_PATHWAY	PID_TGFBRPATHWAY	0.723133	0	804	25	2	23
BIOCARTA_HER2_PATHWAY	KEGG_ENDOCYTOSIS	0.686695	0	642	84	11	73
BIOCARTA_HER2_PATHWAY	PID_MET_PATHWAY	0.680684	0	642	55	11	44
BIOCARTA_HIF_PATHWAY	KEGG_COLORECTAL_CANCER	0.84958	0	785	27	4	23
BIOCARTA_HIF_PATHWAY	KEGG_P53_SIGNALING_PATHWAY	0.788145	0	785	17	1	16
BIOCARTA_HIF_PATHWAY	KEGG_PATHWAYS_IN_CANCER	0.701603	0	785	77	11	66
BIOCARTA_HIF_PATHWAY	KEGG_REGULATION_OF_ACTIN_CYTOSKELETON	0.636605	0	785	47	12	35
BIOCARTA_HIF_PATHWAY	KEGG_UBIQUITIN_MEDIATED_PROTEOLYSIS	0.694861	0	785	50	8	42
BIOCARTA_HIF_PATHWAY	PID_NCADHERINPATHWAY	0.816075	0	785	14	4	10
BIOCARTA_HIF_PATHWAY	PID_VEGFR1_2_PATHWAY	0.780812	0	785	30	9	21
BIOCARTA_HIF_PATHWAY	REACTOME_SIGNALING_BY_RHO_GTPASES	0.67101	0	785	35	3	32
BIOCARTA_HIVNEF_PATHWAY	REACTOME_NGF_SIGNALLING_VIA_TRKA_FROM_THE_PLASMA_MEMBRANE	0.626896	0	555	95	9	86
BIOCARTA_HSP27_PATHWAY	KEGG_REGULATION_OF_ACTIN_CYTOSKELETON	0.67168	0	501	31	5	26
BIOCARTA_HSP27_PATHWAY	REACTOME_SIGNALING_BY_FGFR_IN_DISEASE	0.768113	0	501	21	5	16
BIOCARTA_IGF1MTOR_PATHWAY	BIOCARTA_CCR3_PATHWAY	0.960367	0	570	13	1	12
BIOCARTA_IGF1MTOR_PATHWAY	PID_TGFBRPATHWAY	0.826192	0	570	43	3	40
BIOCARTA_IGF1R_PATHWAY	KEGG_UBIQUITIN_MEDIATED_PROTEOLYSIS	0.648305	0	490	67	14	53
BIOCARTA_IGF1_PATHWAY	KEGG_NEUROTROPHIN_SIGNALING_PATHWAY	0.633457	0	552	45	4	41
BIOCARTA_IL12_PATHWAY	REACTOME_SIGNALING_BY_SCF_KIT	0.926583	0	322	0	0	0
BIOCARTA_IL2RB_PATHWAY	KEGG_NEUROTROPHIN_SIGNALING_PATHWAY	0.621773	0	625	48	8	40
BIOCARTA_IL2RB_PATHWAY	REACTOME_SIGNALLING_BY_NGF	0.66754	0	625	103	14	89
BIOCARTA_IL7_PATHWAY	PID_SMAD2_3NUCLEARPATHWAY	0.673559	0	638	26	7	19
BIOCARTA_KERATINOCYTE_PATHWAY	KEGG_ENDOCYTOSIS	0.62551	0	604	103	14	89
BIOCARTA_KERATINOCYTE_PATHWAY	REACTOME_NGF_SIGNALLING_VIA_TRKA_FROM_THE_PLASMA_MEMBRANE	0.60615	0	604	78	8	70
BIOCARTA_LEPTIN_PATHWAY	KEGG_TGF_BETA_SIGNALING_PATHWAY	0.622646	0	924	10	0	10
BIOCARTA_LEPTIN_PATHWAY	PID_ECADHERIN_KERATINOCYTE_PATHWAY	0.737851	0	924	0	0	0
BIOCARTA_LEPTIN_PATHWAY	PID_MTOR_4PATHWAY	0.62741	0	924	10	0	10
BIOCARTA_LONGEVITY_PATHWAY	BIOCARTA_CHREBP2_PATHWAY	0.80862	0	606	2	0	2
BIOCARTA_LONGEVITY_PATHWAY	KEGG_WNT_SIGNALING_PATHWAY	0.841003	0	606	18	0	18
BIOCARTA_MAL_PATHWAY	KEGG_MELANOGENESIS	0.742037	0	928	30	3	27
BIOCARTA_MAL_PATHWAY	PID_ERBB1_INTERNALIZATION_PATHWAY	0.633775	0	928	14	2	12
BIOCARTA_MAPK_PATHWAY	KEGG_ENDOCYTOSIS	0.640115	0	591	226	37	189
BIOCARTA_MAPK_PATHWAY	PID_ECADHERIN_NASCENTAJ_PATHWAY	0.85433	0	591	63	5	58
BIOCARTA_MAPK_PATHWAY	PID_PDGFRBPATHWAY	0.687717	0	591	230	28	202
BIOCARTA_MET_PATHWAY	KEGG_UBIQUITIN_MEDIATED_PROTEOLYSIS	0.665656	0	920	107	25	82
BIOCARTA_MITOCHONDRIA_PATHWAY	KEGG_OOCYTE_MEIOSIS	0.677927	0	556	20	7	13
BIOCARTA_MITOCHONDRIA_PATHWAY	KEGG_UBIQUITIN_MEDIATED_PROTEOLYSIS	0.802623	0	556	48	13	35
BIOCARTA_MITOCHONDRIA_PATHWAY	REACTOME_SIGNALING_BY_TGF_BETA_RECEPTOR_COMPLEX	0.923515	0	556	30	10	20
BIOCARTA_MTA3_PATHWAY	PID_MYC_ACTIVPATHWAY	0.654025	0	1340	1	0	1
BIOCARTA_MTA3_PATHWAY	REACTOME_SIGNALING_BY_ERBB2	0.607365	0	1340	1	0	1
BIOCARTA_MYOSIN_PATHWAY	KEGG_REGULATION_OF_ACTIN_CYTOSKELETON	0.6439	0	537	106	5	101
BIOCARTA_MYOSIN_PATHWAY	KEGG_UBIQUITIN_MEDIATED_PROTEOLYSIS	0.674482	0	537	82	13	69
BIOCARTA_MYOSIN_PATHWAY	PID_ERBB1_INTERNALIZATION_PATHWAY	0.857438	0	537	34	3	31
BIOCARTA_NDKDYNAMIN_PATHWAY	KEGG_OOCYTE_MEIOSIS	0.614596	0	1479	19	0	19
BIOCARTA_NFAT_PATHWAY	PID_CMYB_PATHWAY	0.671363	0	648	47	2	45
BIOCARTA_NFKB_PATHWAY	PID_TGFBRPATHWAY	0.657175	0	728	12	0	12
BIOCARTA_NGF_PATHWAY	KEGG_REGULATION_OF_ACTIN_CYTOSKELETON	0.665673	0	634	34	4	30
BIOCARTA_NKCELLS_PATHWAY	KEGG_FC_GAMMA_R_MEDIATED_PHAGOCYTOSIS	0.618516	0	1360	5	0	5
BIOCARTA_NO1_PATHWAY	KEGG_UBIQUITIN_MEDIATED_PROTEOLYSIS	0.602624	0	805	32	1	31
BIOCARTA_NTHI_PATHWAY	PID_MET_PATHWAY	0.644833	0	733	60	4	56
BIOCARTA_P27_PATHWAY	PID_AP1_PATHWAY	0.855512	0	800	6	0	6
BIOCARTA_P53HYPOXIA_PATHWAY	KEGG_OOCYTE_MEIOSIS	0.640327	0	606	15	1	14
BIOCARTA_P53HYPOXIA_PATHWAY	KEGG_TIGHT_JUNCTION	0.696929	0	606	22	0	22
BIOCARTA_P53HYPOXIA_PATHWAY	PID_MTOR_4PATHWAY	0.838888	0	606	20	4	16
BIOCARTA_P53_PATHWAY	KEGG_NEUROTROPHIN_SIGNALING_PATHWAY	0.725321	0	558	22	3	19
BIOCARTA_P53_PATHWAY	KEGG_UBIQUITIN_MEDIATED_PROTEOLYSIS	0.641637	0	558	41	10	31
BIOCARTA_P53_PATHWAY	PID_TGFBRPATHWAY	0.896852	0	558	28	6	22
BIOCARTA_P53_PATHWAY	REACTOME_CYTOKINE_SIGNALING_IN_IMMUNE_SYSTEM	0.633012	0	558	41	5	36
BIOCARTA_P53_PATHWAY	REACTOME_NGF_SIGNALLING_VIA_TRKA_FROM_THE_PLASMA_MEMBRANE	0.706967	0	558	23	4	19
BIOCARTA_P53_PATHWAY	REACTOME_SIGNALLING_BY_NGF	0.713932	0	558	37	6	31
BIOCARTA_PAR1_PATHWAY	KEGG_UBIQUITIN_MEDIATED_PROTEOLYSIS	0.676815	0	638	76	11	65
BIOCARTA_PARKIN_PATHWAY	PID_PLK1_PATHWAY	0.6225	0	1576	3	0	3
BIOCARTA_PDGF_PATHWAY	PID_ECADHERIN_NASCENTAJ_PATHWAY	0.906727	0	552	29	1	28
BIOCARTA_PLCE_PATHWAY	KEGG_UBIQUITIN_MEDIATED_PROTEOLYSIS	0.623965	0	493	14	1	13
BIOCARTA_PML_PATHWAY	KEGG_ENDOCYTOSIS	0.629803	0	635	15	4	11
BIOCARTA_PML_PATHWAY	KEGG_FC_GAMMA_R_MEDIATED_PHAGOCYTOSIS	0.842302	0	635	10	1	9
BIOCARTA_PS1_PATHWAY	KEGG_OOCYTE_MEIOSIS	0.662253	0	621	24	4	20
BIOCARTA_PTDINS_PATHWAY	PID_MTOR_4PATHWAY	0.822762	0	545	55	10	45
BIOCARTA_PTDINS_PATHWAY	REACTOME_SIGNALLING_BY_NGF	0.618667	0	545	100	12	88
BIOCARTA_PTEN_PATHWAY	KEGG_UBIQUITIN_MEDIATED_PROTEOLYSIS	0.654558	0	802	52	18	34
BIOCARTA_PTEN_PATHWAY	PID_RHOA_PATHWAY	0.657623	0	802	20	3	17
BIOCARTA_RAB_PATHWAY	ST_JNK_MAPK_PATHWAY	0.803832	0	784	8	0	8
BIOCARTA_RAC1_PATHWAY	PID_MTOR_4PATHWAY	0.940809	0	562	35	0	35
BIOCARTA_RACCYCD_PATHWAY	KEGG_NEUROTROPHIN_SIGNALING_PATHWAY	0.666034	0	811	21	3	18
BIOCARTA_RACCYCD_PATHWAY	KEGG_OOCYTE_MEIOSIS	0.745352	0	811	30	1	29
BIOCARTA_RACCYCD_PATHWAY	PID_PDGFRBPATHWAY	0.667029	0	811	48	4	44
BIOCARTA_RANMS_PATHWAY	BIOCARTA_AT1R_PATHWAY	0.884262	0	714	1	0	1
BIOCARTA_RANMS_PATHWAY	BIOCARTA_PYK2_PATHWAY	0.79817	0	714	1	0	1
BIOCARTA_RANMS_PATHWAY	KEGG_INSULIN_SIGNALING_PATHWAY	0.605852	0	714	4	2	2
BIOCARTA_RANMS_PATHWAY	KEGG_OOCYTE_MEIOSIS	0.757167	0	714	4	1	3
BIOCARTA_RANMS_PATHWAY	PID_MTOR_4PATHWAY	0.642088	0	714	6	1	5
BIOCARTA_RARRXR_PATHWAY	KEGG_WNT_SIGNALING_PATHWAY	0.672899	0	617	54	6	48
BIOCARTA_RARRXR_PATHWAY	PID_MTOR_4PATHWAY	0.784204	0	617	36	4	32
BIOCARTA_RARRXR_PATHWAY	PID_PDGFRBPATHWAY	0.651439	0	617	56	4	52
BIOCARTA_RARRXR_PATHWAY	REACTOME_PLATELET_ACTIVATION_SIGNALING_AND_AGGREGATION	0.609795	0	617	32	2	30
BIOCARTA_RAS_PATHWAY	REACTOME_GOLGI_ASSOCIATED_VESICLE_BIOGENESIS	0.747173	0	890	12	0	12
BIOCARTA_RHO_PATHWAY	KEGG_PATHWAYS_IN_CANCER	0.604605	0	890	90	17	73
BIOCARTA_RHO_PATHWAY	KEGG_UBIQUITIN_MEDIATED_PROTEOLYSIS	0.667065	0	890	51	10	41
BIOCARTA_RHO_PATHWAY	PID_ERBB1_INTERNALIZATION_PATHWAY	0.692744	0	890	18	4	14
BIOCARTA_RHO_PATHWAY	SIG_INSULIN_RECEPTOR_PATHWAY_IN_CARDIAC_MYOCYTES	0.697519	0	890	25	5	20
BIOCARTA_RHO_PATHWAY	ST_PHOSPHOINOSITIDE_3_KINASE_PATHWAY	0.722916	0	890	12	3	9
BIOCARTA_RNA_PATHWAY	BIOCARTA_MET_PATHWAY	0.737852	0	691	7	0	7
BIOCARTA_RNA_PATHWAY	KEGG_RENAL_CELL_CARCINOMA	0.629471	0	691	9	0	9
BIOCARTA_RNA_PATHWAY	PID_PDGFRBPATHWAY	0.619566	0	691	20	1	19
BIOCARTA_SALMONELLA_PATHWAY	KEGG_LONG_TERM_POTENTIATION	0.716722	0	1014	14	3	11
BIOCARTA_SALMONELLA_PATHWAY	KEGG_MELANOGENESIS	0.67064	0	1014	19	2	17
BIOCARTA_SALMONELLA_PATHWAY	KEGG_NEUROTROPHIN_SIGNALING_PATHWAY	0.641525	0	1014	16	2	14
BIOCARTA_SALMONELLA_PATHWAY	KEGG_OOCYTE_MEIOSIS	0.675183	0	1014	16	4	12
BIOCARTA_SHH_PATHWAY	KEGG_UBIQUITIN_MEDIATED_PROTEOLYSIS	0.648454	0	500	54	3	51
BIOCARTA_SKP2E2F_PATHWAY	KEGG_CELL_CYCLE	0.977719	0	719	7	0	7
BIOCARTA_SODD_PATHWAY	KEGG_ENDOCYTOSIS	0.645969	0	768	10	2	8
BIOCARTA_SODD_PATHWAY	KEGG_UBIQUITIN_MEDIATED_PROTEOLYSIS	0.679814	0	768	4	0	4
BIOCARTA_SODD_PATHWAY	PID_ERBB1_DOWNSTREAM_PATHWAY	0.631533	0	768	4	0	4
BIOCARTA_SODD_PATHWAY	PID_MTOR_4PATHWAY	0.600123	0	768	3	0	3
BIOCARTA_SPRY_PATHWAY	PID_ERBB1_INTERNALIZATION_PATHWAY	0.823113	0	651	24	5	19
BIOCARTA_STATHMIN_PATHWAY	KEGG_FC_GAMMA_R_MEDIATED_PHAGOCYTOSIS	0.901106	0	507	12	1	11
BIOCARTA_STATHMIN_PATHWAY	PID_CDC42_PATHWAY	0.775582	0	507	16	1	15
BIOCARTA_STATHMIN_PATHWAY	PID_RAC1_PATHWAY	0.851592	0	507	8	1	7
BIOCARTA_TALL1_PATHWAY	KEGG_REGULATION_OF_ACTIN_CYTOSKELETON	0.606563	0	643	7	0	7
BIOCARTA_TEL_PATHWAY	PID_MTOR_4PATHWAY	0.793049	0	514	44	4	40
BIOCARTA_TID_PATHWAY	KEGG_UBIQUITIN_MEDIATED_PROTEOLYSIS	0.714988	0	791	9	1	8
BIOCARTA_TID_PATHWAY	PID_MYC_ACTIVPATHWAY	0.665228	0	791	3	0	3
BIOCARTA_TNFR1_PATHWAY	PID_MTOR_4PATHWAY	0.786776	0	576	43	0	43
BIOCARTA_TNFR2_PATHWAY	KEGG_TGF_BETA_SIGNALING_PATHWAY	0.747227	0	693	8	0	8
BIOCARTA_TNFR2_PATHWAY	KEGG_TIGHT_JUNCTION	0.639211	0	693	16	0	16
BIOCARTA_TNFR2_PATHWAY	PID_LIS1PATHWAY	0.857329	0	693	2	0	2
BIOCARTA_TPO_PATHWAY	PID_CMYB_PATHWAY	0.755432	0	529	30	0	30
BIOCARTA_TPO_PATHWAY	REACTOME_SIGNALLING_BY_NGF	0.606912	0	529	63	0	63
BIOCARTA_TRKA_PATHWAY	KEGG_REGULATION_OF_ACTIN_CYTOSKELETON	0.711831	0	686	24	4	20
BIOCARTA_VEGF_PATHWAY	PID_HIF1_TFPATHWAY	0.674769	0	700	19	0	19
BIOCARTA_VIP_PATHWAY	REACTOME_NGF_SIGNALLING_VIA_TRKA_FROM_THE_PLASMA_MEMBRANE	0.682007	0	537	35	1	34
BIOCARTA_VIP_PATHWAY	REACTOME_SIGNALLING_BY_NGF	0.633325	0	537	54	1	53
BIOCARTA_VITCB_PATHWAY	REACTOME_SIGNALLING_BY_NGF	0.618898	0	633	13	0	13
KEGG_ADIPOCYTOKINE_SIGNALING_PATHWAY	PID_PLK1_PATHWAY	0.612777	0	1156	11	4	7
KEGG_ALZHEIMERS_DISEASE	KEGG_WNT_SIGNALING_PATHWAY	0.608873	0	1003	113	8	105
KEGG_ALZHEIMERS_DISEASE	PID_MTOR_4PATHWAY	0.679831	0	1003	76	10	66
KEGG_AMINOACYL_TRNA_BIOSYNTHESIS	KEGG_AXON_GUIDANCE	0.668559	0	861	13	0	13
KEGG_AMINOACYL_TRNA_BIOSYNTHESIS	PID_AP1_PATHWAY	0.84229	0	861	9	0	9
KEGG_AMYOTROPHIC_LATERAL_SCLEROSIS_ALS	KEGG_UBIQUITIN_MEDIATED_PROTEOLYSIS	0.693418	0	928	39	9	30
KEGG_AMYOTROPHIC_LATERAL_SCLEROSIS_ALS	PID_MTOR_4PATHWAY	0.75293	0	928	31	6	25
KEGG_ANTIGEN_PROCESSING_AND_PRESENTATION	KEGG_CELL_CYCLE	0.63887	0	756	34	3	31
KEGG_APOPTOSIS	KEGG_NEUROTROPHIN_SIGNALING_PATHWAY	0.689046	0	542	58	13	45
KEGG_APOPTOSIS	KEGG_UBIQUITIN_MEDIATED_PROTEOLYSIS	0.729078	0	542	82	19	63
KEGG_APOPTOSIS	PID_PDGFRBPATHWAY	0.653232	0	542	103	16	87
KEGG_APOPTOSIS	REACTOME_NGF_SIGNALLING_VIA_TRKA_FROM_THE_PLASMA_MEMBRANE	0.724099	0	542	63	13	50
KEGG_APOPTOSIS	REACTOME_SIGNALLING_BY_NGF	0.704049	0	542	101	17	84
KEGG_AXON_GUIDANCE	KEGG_UBIQUITIN_MEDIATED_PROTEOLYSIS	0.678571	0	657	198	30	168
KEGG_BASAL_CELL_CARCINOMA	KEGG_TIGHT_JUNCTION	0.753703	0	594	27	1	26
KEGG_BASAL_CELL_CARCINOMA	PID_RB_1PATHWAY	0.724336	0	594	15	1	14
KEGG_BASAL_TRANSCRIPTION_FACTORS	KEGG_FOCAL_ADHESION	0.647338	0	830	9	1	8
KEGG_BASAL_TRANSCRIPTION_FACTORS	KEGG_NEUROTROPHIN_SIGNALING_PATHWAY	0.674961	0	830	7	1	6
KEGG_BASAL_TRANSCRIPTION_FACTORS	KEGG_PATHWAYS_IN_CANCER	0.604636	0	830	11	2	9
KEGG_BASAL_TRANSCRIPTION_FACTORS	KEGG_RENAL_CELL_CARCINOMA	0.677266	0	830	3	0	3
KEGG_BASAL_TRANSCRIPTION_FACTORS	PID_FAK_PATHWAY	0.606902	0	830	3	0	3
KEGG_BASAL_TRANSCRIPTION_FACTORS	PID_FGF_PATHWAY	0.853899	0	830	5	0	5
KEGG_BASAL_TRANSCRIPTION_FACTORS	PID_PDGFRBPATHWAY	0.68302	0	830	12	0	12
KEGG_BASAL_TRANSCRIPTION_FACTORS	PID_TRKRPATHWAY	0.769466	0	830	6	0	6
KEGG_BASAL_TRANSCRIPTION_FACTORS	REACTOME_GOLGI_ASSOCIATED_VESICLE_BIOGENESIS	0.756312	0	830	2	0	2
KEGG_BASAL_TRANSCRIPTION_FACTORS	REACTOME_MEMBRANE_TRAFFICKING	0.731784	0	830	8	0	8
KEGG_BASAL_TRANSCRIPTION_FACTORS	REACTOME_TRANS_GOLGI_NETWORK_VESICLE_BUDDING	0.786267	0	830	4	0	4
KEGG_BASE_EXCISION_REPAIR	BIOCARTA_MET_PATHWAY	0.821599	0	723	3	1	2
KEGG_BASE_EXCISION_REPAIR	PID_MTOR_4PATHWAY	0.710362	0	723	9	0	9
KEGG_BASE_EXCISION_REPAIR	PID_PDGFRBPATHWAY	0.64382	0	723	15	1	14
KEGG_BASE_EXCISION_REPAIR	PID_TRKRPATHWAY	0.775925	0	723	4	1	3
KEGG_BLADDER_CANCER	PID_PDGFRBPATHWAY	0.646922	0	546	62	6	56
KEGG_BUTANOATE_METABOLISM	KEGG_TIGHT_JUNCTION	0.646076	0	1053	0	0	0
KEGG_B_CELL_RECEPTOR_SIGNALING_PATHWAY	KEGG_UBIQUITIN_MEDIATED_PROTEOLYSIS	0.674787	0	619	126	21	105
KEGG_CALCIUM_SIGNALING_PATHWAY	KEGG_ENDOCYTOSIS	0.654493	0	871	83	4	79
KEGG_CELL_ADHESION_MOLECULES_CAMS	KEGG_PATHWAYS_IN_CANCER	0.605887	0	585	63	0	63
KEGG_CELL_CYCLE	KEGG_UBIQUITIN_MEDIATED_PROTEOLYSIS	0.726282	0	577	182	24	158
KEGG_CHEMOKINE_SIGNALING_PATHWAY	KEGG_UBIQUITIN_MEDIATED_PROTEOLYSIS	0.800594	0	616	208	30	178
KEGG_COMPLEMENT_AND_COAGULATION_CASCADES	KEGG_PATHWAYS_IN_CANCER	0.6192	0	503	20	0	20
KEGG_CYSTEINE_AND_METHIONINE_METABOLISM	PID_CMYB_PATHWAY	0.650922	0	957	19	1	18
KEGG_CYSTEINE_AND_METHIONINE_METABOLISM	PID_MYC_ACTIVPATHWAY	0.712621	0	957	14	0	14
KEGG_CYSTEINE_AND_METHIONINE_METABOLISM	PID_SMAD2_3NUCLEARPATHWAY	0.69998	0	957	27	3	24
KEGG_CYTOKINE_CYTOKINE_RECEPTOR_INTERACTION	REACTOME_MYOGENESIS	0.99647	0	536	20	3	17
KEGG_CYTOSOLIC_DNA_SENSING_PATHWAY	PID_INSULIN_PATHWAY	0.766169	0	679	4	0	4
KEGG_CYTOSOLIC_DNA_SENSING_PATHWAY	PID_MET_PATHWAY	0.666702	0	679	25	0	25
KEGG_CYTOSOLIC_DNA_SENSING_PATHWAY	PID_PDGFRBPATHWAY	0.632296	0	679	25	1	24
KEGG_DILATED_CARDIOMYOPATHY	KEGG_ADHERENS_JUNCTION	0.800022	0	1300	17	1	16
KEGG_DILATED_CARDIOMYOPATHY	PID_CDC42_PATHWAY	0.62477	0	1300	22	0	22
KEGG_DILATED_CARDIOMYOPATHY	PID_ECADHERIN_NASCENTAJ_PATHWAY	0.73077	0	1300	12	0	12
KEGG_DILATED_CARDIOMYOPATHY	PID_EPHBFWDPATHWAY	0.722254	0	1300	14	0	14
KEGG_DILATED_CARDIOMYOPATHY	PID_PI3KCIPATHWAY	0.63742	0	1300	5	1	4
KEGG_DILATED_CARDIOMYOPATHY	PID_RHOA_PATHWAY	0.697539	0	1300	13	1	12
KEGG_DILATED_CARDIOMYOPATHY	PID_VEGFR1_2_PATHWAY	0.685428	0	1300	16	2	14
KEGG_DORSO_VENTRAL_AXIS_FORMATION	KEGG_UBIQUITIN_MEDIATED_PROTEOLYSIS	0.606303	0	680	73	17	56
KEGG_ECM_RECEPTOR_INTERACTION	PID_RB_1PATHWAY	0.6451	0	1051	6	0	6
KEGG_ENDOMETRIAL_CANCER	PID_CMYB_PATHWAY	0.67283	0	587	71	5	66
KEGG_ETHER_LIPID_METABOLISM	BIOCARTA_MAPK_PATHWAY	0.710696	0	903	26	4	22
KEGG_ETHER_LIPID_METABOLISM	KEGG_UBIQUITIN_MEDIATED_PROTEOLYSIS	0.618567	0	903	35	9	26
KEGG_FATTY_ACID_METABOLISM	PID_AJDISS_2PATHWAY	0.60113	0	1480	4	1	3
KEGG_FATTY_ACID_METABOLISM	PID_BETACATENIN_NUC_PATHWAY	0.634799	0	1480	3	0	3
KEGG_FATTY_ACID_METABOLISM	PID_PI3KCIAKTPATHWAY	0.719722	0	1480	4	0	4
KEGG_FC_GAMMA_R_MEDIATED_PHAGOCYTOSIS	KEGG_OOCYTE_MEIOSIS	0.655775	0	576	87	7	80
KEGG_FOCAL_ADHESION	KEGG_UBIQUITIN_MEDIATED_PROTEOLYSIS	0.779426	0	611	256	43	213
KEGG_FOCAL_ADHESION	PID_SMAD2_3NUCLEARPATHWAY	0.754605	0	611	194	30	164
KEGG_GAP_JUNCTION	KEGG_ENDOCYTOSIS	0.815647	0	546	153	16	137
KEGG_GAP_JUNCTION	PID_TGFBRPATHWAY	0.851762	0	546	91	13	78
KEGG_GLUTATHIONE_METABOLISM	PID_SMAD2_3NUCLEARPATHWAY	0.695621	0	1182	1	2	-1
KEGG_GLUTATHIONE_METABOLISM	REACTOME_GOLGI_ASSOCIATED_VESICLE_BIOGENESIS	0.768637	0	1182	4	2	2
KEGG_GLYCEROLIPID_METABOLISM	BIOCARTA_ALK_PATHWAY	0.744875	0	1251	1	1	0
KEGG_GLYCEROLIPID_METABOLISM	KEGG_TIGHT_JUNCTION	0.731646	0	1251	10	0	10
KEGG_GLYCEROLIPID_METABOLISM	PID_CDC42_PATHWAY	0.741904	0	1251	13	0	13
KEGG_GLYCEROLIPID_METABOLISM	PID_ERBB1_INTERNALIZATION_PATHWAY	0.680711	0	1251	8	1	7
KEGG_GLYCEROLIPID_METABOLISM	PID_PI3KCIPATHWAY	0.696021	0	1251	6	0	6
KEGG_GLYCEROLIPID_METABOLISM	PID_TRKRPATHWAY	0.618912	0	1251	6	1	5
KEGG_GLYCEROLIPID_METABOLISM	PID_VEGFR1_2_PATHWAY	0.688106	0	1251	6	1	5
KEGG_GLYCEROLIPID_METABOLISM	REACTOME_GOLGI_ASSOCIATED_VESICLE_BIOGENESIS	0.737772	0	1251	9	0	9
KEGG_GLYCEROLIPID_METABOLISM	SIG_CHEMOTAXIS	0.756898	0	1251	5	0	5
KEGG_GLYCEROPHOSPHOLIPID_METABOLISM	REACTOME_CYTOKINE_SIGNALING_IN_IMMUNE_SYSTEM	0.609696	0	704	68	3	65
KEGG_GLYCOLYSIS_GLUCONEOGENESIS	PID_E2F_PATHWAY	0.613478	0	1997	1	1	0
KEGG_GLYCOLYSIS_GLUCONEOGENESIS	PID_RB_1PATHWAY	0.671987	0	1997	3	1	2
KEGG_GLYCOSAMINOGLYCAN_BIOSYNTHESIS_CHONDROITIN_SULFATE	PID_RB_1PATHWAY	0.924656	0	612	6	0	6
KEGG_GLYCOSAMINOGLYCAN_BIOSYNTHESIS_CHONDROITIN_SULFATE	REACTOME_NGF_SIGNALLING_VIA_TRKA_FROM_THE_PLASMA_MEMBRANE	0.603918	0	612	9	0	9
KEGG_GLYCOSPHINGOLIPID_BIOSYNTHESIS_GANGLIO_SERIES	REACTOME_NGF_SIGNALLING_VIA_TRKA_FROM_THE_PLASMA_MEMBRANE	0.605471	0	719	12	1	11
KEGG_GLYCOSYLPHOSPHATIDYLINOSITOL_GPI_ANCHOR_BIOSYNTHESIS	PID_TGFBRPATHWAY	0.801524	0	556	12	0	12
KEGG_GLYCOSYLPHOSPHATIDYLINOSITOL_GPI_ANCHOR_BIOSYNTHESIS	REACTOME_OPIOID_SIGNALLING	0.75901	0	556	4	0	4
KEGG_GNRH_SIGNALING_PATHWAY	KEGG_ENDOCYTOSIS	0.857658	0	570	168	15	153
KEGG_GNRH_SIGNALING_PATHWAY	KEGG_PATHWAYS_IN_CANCER	0.600091	0	570	212	18	194
KEGG_HEMATOPOIETIC_CELL_LINEAGE	KEGG_WNT_SIGNALING_PATHWAY	0.770356	0	533	12	1	11
KEGG_HUNTINGTONS_DISEASE	KEGG_WNT_SIGNALING_PATHWAY	0.749523	0	623	198	26	172
KEGG_HYPERTROPHIC_CARDIOMYOPATHY_HCM	BIOCARTA_RACCYCD_PATHWAY	0.749796	0	1501	6	0	6
KEGG_HYPERTROPHIC_CARDIOMYOPATHY_HCM	PID_ECADHERIN_NASCENTAJ_PATHWAY	0.780763	0	1501	14	0	14
KEGG_HYPERTROPHIC_CARDIOMYOPATHY_HCM	PID_NCADHERINPATHWAY	0.789964	0	1501	12	1	11
KEGG_HYPERTROPHIC_CARDIOMYOPATHY_HCM	PID_RET_PATHWAY	0.64064	0	1501	15	1	14
KEGG_HYPERTROPHIC_CARDIOMYOPATHY_HCM	PID_RHOA_PATHWAY	0.601785	0	1501	16	1	15
KEGG_HYPERTROPHIC_CARDIOMYOPATHY_HCM	PID_VEGFR1_2_PATHWAY	0.608511	0	1501	20	1	19
KEGG_HYPERTROPHIC_CARDIOMYOPATHY_HCM	PID_VEGFR1_PATHWAY	0.681577	0	1501	12	2	10
KEGG_INOSITOL_PHOSPHATE_METABOLISM	KEGG_UBIQUITIN_MEDIATED_PROTEOLYSIS	0.784924	0	601	92	28	64
KEGG_INTESTINAL_IMMUNE_NETWORK_FOR_IGA_PRODUCTION	BIOCARTA_MET_PATHWAY	0.763736	0	622	0	0	0
KEGG_INTESTINAL_IMMUNE_NETWORK_FOR_IGA_PRODUCTION	PID_MET_PATHWAY	0.634363	0	622	2	0	2
KEGG_LEUKOCYTE_TRANSENDOTHELIAL_MIGRATION	KEGG_UBIQUITIN_MEDIATED_PROTEOLYSIS	0.725756	0	725	98	17	81
KEGG_LONG_TERM_DEPRESSION	PID_MTOR_4PATHWAY	0.800244	0	538	61	7	54
KEGG_LONG_TERM_POTENTIATION	KEGG_ENDOCYTOSIS	0.632682	0	811	143	14	129
KEGG_LONG_TERM_POTENTIATION	PID_FAK_PATHWAY	0.653979	0	811	84	8	76
KEGG_LYSINE_DEGRADATION	KEGG_NEUROTROPHIN_SIGNALING_PATHWAY	0.620399	0	637	67	5	62
KEGG_LYSINE_DEGRADATION	KEGG_UBIQUITIN_MEDIATED_PROTEOLYSIS	0.646955	0	637	117	12	105
KEGG_LYSINE_DEGRADATION	REACTOME_SIGNALING_BY_INSULIN_RECEPTOR	0.760137	0	637	67	3	64
KEGG_LYSINE_DEGRADATION	REACTOME_TRANS_GOLGI_NETWORK_VESICLE_BUDDING	0.657262	0	637	55	8	47
KEGG_LYSOSOME	KEGG_UBIQUITIN_MEDIATED_PROTEOLYSIS	0.628086	0	583	140	7	133
KEGG_MAPK_SIGNALING_PATHWAY	KEGG_UBIQUITIN_MEDIATED_PROTEOLYSIS	0.64854	0	693	323	47	276
KEGG_MELANOGENESIS	PID_CMYB_PATHWAY	0.780012	0	540	101	6	95
KEGG_MISMATCH_REPAIR	BIOCARTA_CHREBP2_PATHWAY	0.816335	0	601	5	0	5
KEGG_MISMATCH_REPAIR	KEGG_OOCYTE_MEIOSIS	0.724194	0	601	10	2	8
KEGG_MTOR_SIGNALING_PATHWAY	KEGG_OOCYTE_MEIOSIS	0.640915	0	614	64	9	55
KEGG_MTOR_SIGNALING_PATHWAY	PID_TGFBRPATHWAY	0.778245	0	614	85	11	74
KEGG_MTOR_SIGNALING_PATHWAY	REACTOME_SIGNALLING_BY_NGF	0.621822	0	614	138	16	122
KEGG_NATURAL_KILLER_CELL_MEDIATED_CYTOTOXICITY	KEGG_UBIQUITIN_MEDIATED_PROTEOLYSIS	0.627647	0	687	106	28	78
KEGG_NEUROACTIVE_LIGAND_RECEPTOR_INTERACTION	KEGG_DORSO_VENTRAL_AXIS_FORMATION	0.95409	0	1327	4	2	2
KEGG_NEUROACTIVE_LIGAND_RECEPTOR_INTERACTION	PID_AR_PATHWAY	0.692364	0	1327	6	0	6
KEGG_NEUROTROPHIN_SIGNALING_PATHWAY	KEGG_UBIQUITIN_MEDIATED_PROTEOLYSIS	0.744218	0	720	203	33	170
KEGG_NICOTINATE_AND_NICOTINAMIDE_METABOLISM	BIOCARTA_NFAT_PATHWAY	0.825901	0	612	0	0	0
KEGG_NOD_LIKE_RECEPTOR_SIGNALING_PATHWAY	KEGG_ENDOCYTOSIS	0.637441	0	605	104	21	83
KEGG_NOD_LIKE_RECEPTOR_SIGNALING_PATHWAY	PID_MTOR_4PATHWAY	0.790491	0	605	61	14	47
KEGG_NON_SMALL_CELL_LUNG_CANCER	KEGG_ENDOCYTOSIS	0.77501	0	565	123	19	104
KEGG_NUCLEOTIDE_EXCISION_REPAIR	PID_HIF1_TFPATHWAY	0.676916	0	1060	6	0	6
KEGG_N_GLYCAN_BIOSYNTHESIS	KEGG_ENDOCYTOSIS	0.64619	0	542	38	0	38
KEGG_N_GLYCAN_BIOSYNTHESIS	REACTOME_SIGNALLING_BY_NGF	0.646811	0	542	42	0	42
KEGG_ONE_CARBON_POOL_BY_FOLATE	PID_MTOR_4PATHWAY	0.771676	0	611	13	1	12
KEGG_ONE_CARBON_POOL_BY_FOLATE	PID_PDGFRBPATHWAY	0.633257	0	611	19	1	18
KEGG_OXIDATIVE_PHOSPHORYLATION	PID_ILK_PATHWAY	0.652859	0	1982	5	0	5
KEGG_OXIDATIVE_PHOSPHORYLATION	PID_VEGFR1_PATHWAY	0.656272	0	1982	7	0	7
KEGG_O_GLYCAN_BIOSYNTHESIS	BIOCARTA_TOB1_PATHWAY	0.884963	0	615	4	1	3
KEGG_O_GLYCAN_BIOSYNTHESIS	PID_LKB1_PATHWAY	0.8817	0	615	15	0	15
KEGG_P53_SIGNALING_PATHWAY	PID_MTOR_4PATHWAY	0.780847	0	576	44	6	38
KEGG_P53_SIGNALING_PATHWAY	PID_PI3KPLCTRKPATHWAY	0.827173	0	576	32	2	30
KEGG_P53_SIGNALING_PATHWAY	PID_TGFBRPATHWAY	0.799186	0	576	54	7	47
KEGG_P53_SIGNALING_PATHWAY	REACTOME_SIGNALLING_BY_NGF	0.638581	0	576	74	10	64
KEGG_PANCREATIC_CANCER	KEGG_ENDOCYTOSIS	0.770679	0	519	150	6	144
KEGG_PARKINSONS_DISEASE	PID_NCADHERINPATHWAY	0.678124	0	1942	0	3	-3
KEGG_PHOSPHATIDYLINOSITOL_SIGNALING_SYSTEM	KEGG_ENDOCYTOSIS	0.71671	0	596	154	22	132
KEGG_PHOSPHATIDYLINOSITOL_SIGNALING_SYSTEM	KEGG_MAPK_SIGNALING_PATHWAY	0.609424	0	596	142	17	125
KEGG_PORPHYRIN_AND_CHLOROPHYLL_METABOLISM	BIOCARTA_AT1R_PATHWAY	0.775356	0	1333	4	0	4
KEGG_PORPHYRIN_AND_CHLOROPHYLL_METABOLISM	BIOCARTA_GCR_PATHWAY	0.83761	0	1333	0	0	0
KEGG_PORPHYRIN_AND_CHLOROPHYLL_METABOLISM	BIOCARTA_PYK2_PATHWAY	0.721887	0	1333	3	0	3
KEGG_PORPHYRIN_AND_CHLOROPHYLL_METABOLISM	PID_HIF1_TFPATHWAY	0.723095	0	1333	7	0	7
KEGG_PORPHYRIN_AND_CHLOROPHYLL_METABOLISM	REACTOME_NEUROTRANSMITTER_RECEPTOR_BINDING_AND_DOWNSTREAM_TRANSMISSION_IN_THE_POSTSYNAPTIC_CELL	0.765376	0	1333	8	0	8
KEGG_PORPHYRIN_AND_CHLOROPHYLL_METABOLISM	REACTOME_OPIOID_SIGNALLING	0.656243	0	1333	2	0	2
KEGG_PORPHYRIN_AND_CHLOROPHYLL_METABOLISM	REACTOME_TRANSMISSION_ACROSS_CHEMICAL_SYNAPSES	0.696129	0	1333	9	0	9
KEGG_PORPHYRIN_AND_CHLOROPHYLL_METABOLISM	REACTOME_TRANS_GOLGI_NETWORK_VESICLE_BUDDING	0.614621	0	1333	5	0	5
KEGG_PRION_DISEASES	KEGG_FC_GAMMA_R_MEDIATED_PHAGOCYTOSIS	0.634312	0	921	13	2	11
KEGG_PRION_DISEASES	KEGG_TGF_BETA_SIGNALING_PATHWAY	0.734566	0	921	21	2	19
KEGG_PRION_DISEASES	PID_CDC42_PATHWAY	0.732912	0	921	19	2	17
KEGG_PRION_DISEASES	PID_MET_PATHWAY	0.71642	0	921	29	6	23
KEGG_PRION_DISEASES	PID_PDGFRBPATHWAY	0.603089	0	921	37	6	31
KEGG_PRION_DISEASES	PID_RAC1_PATHWAY	0.693618	0	921	10	1	9
KEGG_PRION_DISEASES	REACTOME_SIGNALING_BY_TGF_BETA_RECEPTOR_COMPLEX	0.816045	0	921	24	2	22
KEGG_PRION_DISEASES	REACTOME_TRANSCRIPTIONAL_ACTIVITY_OF_SMAD2_SMAD3_SMAD4_HETEROTRIMER	0.872537	0	921	9	1	8
KEGG_PROGESTERONE_MEDIATED_OOCYTE_MATURATION	KEGG_TGF_BETA_SIGNALING_PATHWAY	0.820506	0	491	59	4	55
KEGG_PROTEASOME	PID_NFAT_3PATHWAY	0.755873	0	1413	8	3	5
KEGG_PROTEIN_EXPORT	PID_MTOR_4PATHWAY	0.665578	0	594	25	0	25
KEGG_PROTEIN_EXPORT	REACTOME_SIGNALING_BY_RHO_GTPASES	0.757558	0	594	16	0	16
KEGG_PURINE_METABOLISM	BIOCARTA_CHREBP2_PATHWAY	0.781384	0	735	16	0	16
KEGG_PURINE_METABOLISM	KEGG_OOCYTE_MEIOSIS	0.776413	0	735	32	0	32
KEGG_PURINE_METABOLISM	PID_LKB1_PATHWAY	0.886255	0	735	31	0	31
KEGG_PURINE_METABOLISM	PID_MTOR_4PATHWAY	0.742496	0	735	34	2	32
KEGG_PURINE_METABOLISM	REACTOME_NGF_SIGNALLING_VIA_TRKA_FROM_THE_PLASMA_MEMBRANE	0.615643	0	735	38	1	37
KEGG_PURINE_METABOLISM	REACTOME_SIGNALING_BY_RHO_GTPASES	0.656071	0	735	35	1	34
KEGG_PURINE_METABOLISM	REACTOME_SIGNALLING_BY_NGF	0.622164	0	735	57	1	56
KEGG_PYRIMIDINE_METABOLISM	KEGG_NEUROTROPHIN_SIGNALING_PATHWAY	0.686888	0	834	23	1	22
KEGG_PYRIMIDINE_METABOLISM	KEGG_T_CELL_RECEPTOR_SIGNALING_PATHWAY	0.738926	0	834	18	0	18
KEGG_PYRIMIDINE_METABOLISM	PID_PDGFRBPATHWAY	0.603481	0	834	36	1	35
KEGG_PYRIMIDINE_METABOLISM	REACTOME_SIGNALING_BY_RHO_GTPASES	0.715033	0	834	18	2	16
KEGG_PYRIMIDINE_METABOLISM	SIG_CHEMOTAXIS	0.821452	0	834	14	0	14
KEGG_PYRUVATE_METABOLISM	REACTOME_G1_PHASE	0.725892	0	1461	1	1	0
KEGG_REGULATION_OF_ACTIN_CYTOSKELETON	KEGG_UBIQUITIN_MEDIATED_PROTEOLYSIS	0.636604	0	651	331	59	272
KEGG_REGULATION_OF_AUTOPHAGY	KEGG_MAPK_SIGNALING_PATHWAY	0.62505	0	681	36	0	36
KEGG_REGULATION_OF_AUTOPHAGY	KEGG_PATHWAYS_IN_CANCER	0.6265	0	681	37	0	37
KEGG_REGULATION_OF_AUTOPHAGY	REACTOME_NGF_SIGNALLING_VIA_TRKA_FROM_THE_PLASMA_MEMBRANE	0.693805	0	681	27	0	27
KEGG_REGULATION_OF_AUTOPHAGY	REACTOME_SIGNALLING_BY_NGF	0.60372	0	681	38	0	38
KEGG_RIBOSOME	REACTOME_DOWNSTREAM_SIGNAL_TRANSDUCTION	0.649342	0	842	0	0	0
KEGG_RIBOSOME	REACTOME_MEMBRANE_TRAFFICKING	0.602211	0	842	0	0	0
KEGG_RIG_I_LIKE_RECEPTOR_SIGNALING_PATHWAY	KEGG_ENDOCYTOSIS	0.600947	0	590	69	10	59
KEGG_RIG_I_LIKE_RECEPTOR_SIGNALING_PATHWAY	PID_MTOR_4PATHWAY	0.770371	0	590	39	5	34
KEGG_RNA_DEGRADATION	BIOCARTA_CCR3_PATHWAY	0.931172	0	700	30	4	26
KEGG_RNA_POLYMERASE	KEGG_WNT_SIGNALING_PATHWAY	0.694566	0	795	5	0	5
KEGG_SMALL_CELL_LUNG_CANCER	KEGG_UBIQUITIN_MEDIATED_PROTEOLYSIS	0.735625	0	587	81	13	68
KEGG_SMALL_CELL_LUNG_CANCER	REACTOME_NGF_SIGNALLING_VIA_TRKA_FROM_THE_PLASMA_MEMBRANE	0.693159	0	587	75	9	66
KEGG_SMALL_CELL_LUNG_CANCER	REACTOME_SIGNALLING_BY_NGF	0.639585	0	587	114	10	104
KEGG_SNARE_INTERACTIONS_IN_VESICULAR_TRANSPORT	KEGG_UBIQUITIN_MEDIATED_PROTEOLYSIS	0.710627	0	734	44	2	42
KEGG_SNARE_INTERACTIONS_IN_VESICULAR_TRANSPORT	PID_FOXOPATHWAY	0.649584	0	734	17	0	17
KEGG_SNARE_INTERACTIONS_IN_VESICULAR_TRANSPORT	PID_RAC1_PATHWAY	0.740173	0	734	18	0	18
KEGG_SPLICEOSOME	PID_MTOR_4PATHWAY	0.67081	0	877	84	5	79
KEGG_SYSTEMIC_LUPUS_ERYTHEMATOSUS	REACTOME_DOWNSTREAM_SIGNAL_TRANSDUCTION	0.650098	0	868	12	1	11
KEGG_TASTE_TRANSDUCTION	KEGG_UBIQUITIN_MEDIATED_PROTEOLYSIS	0.600073	0	590	6	0	6
KEGG_TAURINE_AND_HYPOTAURINE_METABOLISM	PID_INSULIN_PATHWAY	0.618825	0	829	0	0	0
KEGG_TERPENOID_BACKBONE_BIOSYNTHESIS	KEGG_OOCYTE_MEIOSIS	0.661488	0	1332	0	1	-1
KEGG_TERPENOID_BACKBONE_BIOSYNTHESIS	PID_FOXOPATHWAY	0.612303	0	1332	0	0	0
KEGG_TERPENOID_BACKBONE_BIOSYNTHESIS	PID_NFAT_3PATHWAY	0.700466	0	1332	0	0	0
KEGG_TGF_BETA_SIGNALING_PATHWAY	KEGG_UBIQUITIN_MEDIATED_PROTEOLYSIS	0.769209	0	583	230	44	186
KEGG_TGF_BETA_SIGNALING_PATHWAY	REACTOME_SIGNALLING_BY_NGF	0.603472	0	583	225	38	187
KEGG_TIGHT_JUNCTION	KEGG_UBIQUITIN_MEDIATED_PROTEOLYSIS	0.682508	0	641	190	8	182
KEGG_TOLL_LIKE_RECEPTOR_SIGNALING_PATHWAY	KEGG_OOCYTE_MEIOSIS	0.761455	0	559	40	2	38
KEGG_TYPE_II_DIABETES_MELLITUS	KEGG_ENDOCYTOSIS	0.763818	0	546	49	6	43
KEGG_T_CELL_RECEPTOR_SIGNALING_PATHWAY	KEGG_UBIQUITIN_MEDIATED_PROTEOLYSIS	0.729753	0	655	160	27	133
KEGG_VASCULAR_SMOOTH_MUSCLE_CONTRACTION	KEGG_ENDOCYTOSIS	0.876888	0	619	150	23	127
KEGG_VASOPRESSIN_REGULATED_WATER_REABSORPTION	KEGG_PATHWAYS_IN_CANCER	0.677936	0	544	119	10	109
KEGG_VASOPRESSIN_REGULATED_WATER_REABSORPTION	KEGG_UBIQUITIN_MEDIATED_PROTEOLYSIS	0.740187	0	544	105	12	93
KEGG_VASOPRESSIN_REGULATED_WATER_REABSORPTION	REACTOME_ADAPTIVE_IMMUNE_SYSTEM	0.602906	0	544	229	31	198
KEGG_VEGF_SIGNALING_PATHWAY	KEGG_ENDOCYTOSIS	0.699467	0	615	117	8	109
KEGG_VIRAL_MYOCARDITIS	PID_ERBB1_INTERNALIZATION_PATHWAY	0.746787	0	770	25	2	23
KEGG_VIRAL_MYOCARDITIS	REACTOME_CIRCADIAN_CLOCK	0.756215	0	770	14	5	9
KEGG_WNT_SIGNALING_PATHWAY	KEGG_UBIQUITIN_MEDIATED_PROTEOLYSIS	0.698316	0	550	280	26	254
PID_A6B1_A6B4_INTEGRIN_PATHWAY	KEGG_UBIQUITIN_MEDIATED_PROTEOLYSIS	0.629365	0	860	40	4	36
PID_ALK1PATHWAY	KEGG_MAPK_SIGNALING_PATHWAY	0.64544	0	654	111	14	97
PID_ALK1PATHWAY	KEGG_UBIQUITIN_MEDIATED_PROTEOLYSIS	0.741465	0	654	92	22	70
PID_ALK1PATHWAY	REACTOME_NGF_SIGNALLING_VIA_TRKA_FROM_THE_PLASMA_MEMBRANE	0.701264	0	654	67	14	53
PID_ALK1PATHWAY	REACTOME_SIGNALLING_BY_NGF	0.623922	0	654	95	18	77
PID_ALK2PATHWAY	KEGG_UBIQUITIN_MEDIATED_PROTEOLYSIS	0.766147	0	652	48	13	35
PID_ANGIOPOIETINRECEPTOR_PATHWAY	PID_CMYB_PATHWAY	0.765222	0	640	58	5	53
PID_ARF6DOWNSTREAMPATHWAY	PID_PDGFRBPATHWAY	0.625847	0	1012	41	4	37
PID_ARF6_TRAFFICKINGPATHWAY	KEGG_CELL_CYCLE	0.669324	0	652	31	1	30
PID_ARF6_TRAFFICKINGPATHWAY	KEGG_MAPK_SIGNALING_PATHWAY	0.755924	0	652	85	8	77
PID_ARF6_TRAFFICKINGPATHWAY	KEGG_UBIQUITIN_MEDIATED_PROTEOLYSIS	0.715075	0	652	69	10	59
PID_ARF6_TRAFFICKINGPATHWAY	PID_CMYB_PATHWAY	0.78535	0	652	35	1	34
PID_ARF6_TRAFFICKINGPATHWAY	PID_ERBB1_DOWNSTREAM_PATHWAY	0.82134	0	652	56	7	49
PID_ARF6_TRAFFICKINGPATHWAY	REACTOME_NGF_SIGNALLING_VIA_TRKA_FROM_THE_PLASMA_MEMBRANE	0.679223	0	652	61	4	57
PID_ATF2_PATHWAY	PID_PDGFRBPATHWAY	0.713355	0	604	105	15	90
PID_ATM_PATHWAY	REACTOME_SIGNALING_BY_RHO_GTPASES	0.680757	0	684	17	2	15
PID_ATR_PATHWAY	KEGG_PATHWAYS_IN_CANCER	0.611988	0	772	34	8	26
PID_ATR_PATHWAY	KEGG_TIGHT_JUNCTION	0.706099	0	772	15	3	12
PID_ATR_PATHWAY	KEGG_UBIQUITIN_MEDIATED_PROTEOLYSIS	0.694998	0	772	27	12	15
PID_ATR_PATHWAY	PID_CMYB_PATHWAY	0.766985	0	772	12	4	8
PID_ATR_PATHWAY	PID_MTOR_4PATHWAY	0.726192	0	772	13	6	7
PID_ATR_PATHWAY	PID_PDGFRBPATHWAY	0.770352	0	772	25	5	20
PID_ATR_PATHWAY	REACTOME_SIGNALING_BY_TGF_BETA_RECEPTOR_COMPLEX	0.930749	0	772	18	3	15
PID_ATR_PATHWAY	REACTOME_SIGNALLING_BY_NGF	0.635781	0	772	25	6	19
PID_ATR_PATHWAY	REACTOME_TRANSCRIPTIONAL_ACTIVITY_OF_SMAD2_SMAD3_SMAD4_HETEROTRIMER	0.906172	0	772	12	3	9
PID_AURORA_A_PATHWAY	KEGG_UBIQUITIN_MEDIATED_PROTEOLYSIS	0.631507	0	684	48	4	44
PID_AURORA_B_PATHWAY	KEGG_UBIQUITIN_MEDIATED_PROTEOLYSIS	0.708463	0	722	72	12	60
PID_AVB3_INTEGRIN_PATHWAY	KEGG_UBIQUITIN_MEDIATED_PROTEOLYSIS	0.741669	0	577	124	39	85
PID_AVB3_OPN_PATHWAY	KEGG_OOCYTE_MEIOSIS	0.729137	0	688	45	2	43
PID_BARD1PATHWAY	KEGG_ENDOCYTOSIS	0.661736	0	645	20	2	18
PID_BCR_5PATHWAY	KEGG_REGULATION_OF_ACTIN_CYTOSKELETON	0.642027	0	575	152	11	141
PID_BCR_5PATHWAY	PID_PDGFRBPATHWAY	0.625831	0	575	124	13	111
PID_BETACATENIN_DEG_PATHWAY	KEGG_AXON_GUIDANCE	0.704498	0	666	35	2	33
PID_BETACATENIN_DEG_PATHWAY	KEGG_TIGHT_JUNCTION	0.683905	0	666	34	2	32
PID_CASPASE_PATHWAY	PID_PDGFRBPATHWAY	0.686654	0	647	91	9	82
PID_CD40_PATHWAY	KEGG_TIGHT_JUNCTION	0.673052	0	644	24	0	24
PID_CD8TCRDOWNSTREAMPATHWAY	KEGG_ENDOCYTOSIS	0.623808	0	808	77	5	72
PID_CD8TCRPATHWAY	KEGG_ENDOCYTOSIS	0.691882	0	665	96	16	80
PID_CD8TCRPATHWAY	REACTOME_MYOGENESIS	0.985633	0	665	14	1	13
PID_CDC42_REG_PATHWAY	KEGG_UBIQUITIN_MEDIATED_PROTEOLYSIS	0.681732	0	616	50	10	40
PID_CERAMIDE_PATHWAY	KEGG_ENDOCYTOSIS	0.919626	0	542	83	7	76
PID_CERAMIDE_PATHWAY	KEGG_TIGHT_JUNCTION	0.691356	0	542	55	0	55
PID_CERAMIDE_PATHWAY	PID_EPHA_FWDPATHWAY	0.96703	0	542	19	2	17
PID_CERAMIDE_PATHWAY	REACTOME_NGF_SIGNALLING_VIA_TRKA_FROM_THE_PLASMA_MEMBRANE	0.649636	0	542	59	2	57
PID_CMYB_PATHWAY	BIOCARTA_MET_PATHWAY	0.755593	0	557	66	4	62
PID_CMYB_PATHWAY	KEGG_REGULATION_OF_ACTIN_CYTOSKELETON	0.642344	0	557	185	9	176
PID_CMYB_PATHWAY	PID_P38_MK2PATHWAY	0.960717	0	557	19	3	16
PID_CMYB_PATHWAY	REACTOME_SIGNALLING_BY_NGF	0.627428	0	557	182	15	167
PID_CXCR3PATHWAY	KEGG_ENDOCYTOSIS	0.646244	0	621	115	20	95
PID_CXCR4_PATHWAY	KEGG_UBIQUITIN_MEDIATED_PROTEOLYSIS	0.685971	0	674	178	38	140
PID_DELTANP63PATHWAY	KEGG_MAPK_SIGNALING_PATHWAY	0.625449	0	563	78	8	70
PID_E2F_PATHWAY	PID_PDGFRBPATHWAY	0.60296	0	588	172	16	156
PID_ECADHERIN_KERATINOCYTE_PATHWAY	KEGG_PATHWAYS_IN_CANCER	0.62226	0	693	68	4	64
PID_ECADHERIN_KERATINOCYTE_PATHWAY	REACTOME_PLATELET_ACTIVATION_SIGNALING_AND_AGGREGATION	0.637687	0	693	52	1	51
PID_ECADHERIN_STABILIZATION_PATHWAY	KEGG_UBIQUITIN_MEDIATED_PROTEOLYSIS	0.749186	0	526	90	10	80
PID_ENDOTHELINPATHWAY	PID_ERBB1_INTERNALIZATION_PATHWAY	0.737615	0	646	27	2	25
PID_EPHA2_FWDPATHWAY	PID_ERBB1_INTERNALIZATION_PATHWAY	0.668873	0	923	10	2	8
PID_EPHA_FWDPATHWAY	KEGG_ENDOCYTOSIS	0.812554	0	731	86	11	75
PID_EPHA_FWDPATHWAY	KEGG_UBIQUITIN_MEDIATED_PROTEOLYSIS	0.61443	0	731	75	11	64
PID_ERA_GENOMIC_PATHWAY	KEGG_REGULATION_OF_ACTIN_CYTOSKELETON	0.684614	0	549	118	11	107
PID_ERBB1_INTERNALIZATION_PATHWAY	KEGG_WNT_SIGNALING_PATHWAY	0.625985	0	896	109	15	94
PID_ERBB1_INTERNALIZATION_PATHWAY	PID_SMAD2_3NUCLEARPATHWAY	0.684492	0	896	83	8	75
PID_ERBB1_RECEPTOR_PROXIMAL_PATHWAY	KEGG_UBIQUITIN_MEDIATED_PROTEOLYSIS	0.698377	0	536	143	29	114
PID_ERBB2ERBB3PATHWAY	KEGG_AXON_GUIDANCE	0.7889	0	622	81	11	70
PID_ERB_GENOMIC_PATHWAY	KEGG_NEUROTROPHIN_SIGNALING_PATHWAY	0.611049	0	579	33	4	29
PID_ERB_GENOMIC_PATHWAY	KEGG_UBIQUITIN_MEDIATED_PROTEOLYSIS	0.670058	0	579	54	8	46
PID_ERB_GENOMIC_PATHWAY	PID_ECADHERIN_NASCENTAJ_PATHWAY	0.907378	0	579	15	0	15
PID_ERB_GENOMIC_PATHWAY	PID_NCADHERINPATHWAY	0.790843	0	579	14	2	12
PID_ERB_GENOMIC_PATHWAY	PID_PDGFRBPATHWAY	0.642017	0	579	55	4	51
PID_ER_NONGENOMIC_PATHWAY	KEGG_UBIQUITIN_MEDIATED_PROTEOLYSIS	0.802954	0	514	122	20	102
PID_FAK_PATHWAY	KEGG_UBIQUITIN_MEDIATED_PROTEOLYSIS	0.604391	0	850	162	24	138
PID_FANCONI_PATHWAY	KEGG_ENDOCYTOSIS	0.614407	0	663	41	9	32
PID_FANCONI_PATHWAY	KEGG_GNRH_SIGNALING_PATHWAY	0.73744	0	663	22	3	19
PID_FANCONI_PATHWAY	KEGG_NEUROTROPHIN_SIGNALING_PATHWAY	0.645678	0	663	24	3	21
PID_FANCONI_PATHWAY	PID_LKB1_PATHWAY	0.849449	0	663	19	1	18
PID_FANCONI_PATHWAY	PID_PDGFRBPATHWAY	0.711602	0	663	38	7	31
PID_FANCONI_PATHWAY	PID_RET_PATHWAY	0.871757	0	663	14	3	11
PID_FASPATHWAY	KEGG_ENDOCYTOSIS	0.779296	0	562	78	7	71
PID_FCER1PATHWAY	KEGG_UBIQUITIN_MEDIATED_PROTEOLYSIS	0.690522	0	582	104	27	77
PID_FCER1PATHWAY	REACTOME_NGF_SIGNALLING_VIA_TRKA_FROM_THE_PLASMA_MEMBRANE	0.637875	0	582	101	15	86
PID_FOXM1PATHWAY	KEGG_LONG_TERM_POTENTIATION	0.794868	0	735	20	4	16
PID_FRA_PATHWAY	KEGG_REGULATION_OF_ACTIN_CYTOSKELETON	0.649074	0	639	53	8	45
PID_FRA_PATHWAY	KEGG_UBIQUITIN_MEDIATED_PROTEOLYSIS	0.706753	0	639	58	6	52
PID_GMCSF_PATHWAY	KEGG_UBIQUITIN_MEDIATED_PROTEOLYSIS	0.679982	0	662	76	24	52
PID_HDAC_CLASSIII_PATHWAY	KEGG_FOCAL_ADHESION	0.61138	0	829	27	9	18
PID_HDAC_CLASSIII_PATHWAY	PID_CMYB_PATHWAY	0.730949	0	829	26	2	24
PID_HDAC_CLASSIII_PATHWAY	PID_FAK_PATHWAY	0.736128	0	829	20	4	16
PID_HDAC_CLASSIII_PATHWAY	REACTOME_PLATELET_ACTIVATION_SIGNALING_AND_AGGREGATION	0.605325	0	829	17	3	14
PID_HDAC_CLASSII_PATHWAY	REACTOME_SIGNALING_BY_RHO_GTPASES	0.604554	0	765	25	6	19
PID_HEDGEHOG_GLIPATHWAY	KEGG_WNT_SIGNALING_PATHWAY	0.758586	0	608	108	9	99
PID_HIF1APATHWAY	KEGG_COLORECTAL_CANCER	0.612123	0	1226	6	1	5
PID_HIF1APATHWAY	KEGG_T_CELL_RECEPTOR_SIGNALING_PATHWAY	0.65715	0	1226	8	1	7
PID_HIF1APATHWAY	PID_P53REGULATIONPATHWAY	0.758856	0	1226	13	3	10
PID_HIF1APATHWAY	PID_PI3KPLCTRKPATHWAY	0.602541	0	1226	4	1	3
PID_HIF1APATHWAY	PID_TRKRPATHWAY	0.669318	0	1226	5	0	5
PID_HIF1APATHWAY	REACTOME_OPIOID_SIGNALLING	0.653725	0	1226	3	1	2
PID_HIF1APATHWAY	REACTOME_SIGNALING_BY_ILS	0.64839	0	1226	12	0	12
PID_HIF1APATHWAY	REACTOME_SIGNALING_BY_RHO_GTPASES	0.65085	0	1226	8	0	8
PID_HIF1APATHWAY	REACTOME_SIGNALING_BY_SCF_KIT	0.692614	0	1226	8	0	8
PID_HIF1APATHWAY	SIG_INSULIN_RECEPTOR_PATHWAY_IN_CARDIAC_MYOCYTES	0.647329	0	1226	4	1	3
PID_HIF1APATHWAY	SIG_PIP3_SIGNALING_IN_CARDIAC_MYOCTES	0.600938	0	1226	3	1	2
PID_HIF1APATHWAY	ST_PHOSPHOINOSITIDE_3_KINASE_PATHWAY	0.681526	0	1226	2	1	1
PID_HIF1_TFPATHWAY	BIOCARTA_MET_PATHWAY	0.859019	0	830	40	9	31
PID_HIF1_TFPATHWAY	BIOCARTA_TCR_PATHWAY	0.814177	0	830	37	1	36
PID_HIF1_TFPATHWAY	KEGG_ADHERENS_JUNCTION	0.831777	0	830	78	12	66
PID_HIF1_TFPATHWAY	KEGG_GLIOMA	0.868706	0	830	51	4	47
PID_HIF1_TFPATHWAY	KEGG_NEUROTROPHIN_SIGNALING_PATHWAY	0.75718	0	830	90	13	77
PID_HIF1_TFPATHWAY	KEGG_TIGHT_JUNCTION	0.679595	0	830	79	6	73
PID_HIF1_TFPATHWAY	PID_CXCR4_PATHWAY	0.739403	0	830	74	16	58
PID_HIF1_TFPATHWAY	PID_ECADHERIN_NASCENTAJ_PATHWAY	0.908415	0	830	34	1	33
PID_HIF1_TFPATHWAY	PID_EPHBFWDPATHWAY	0.894673	0	830	50	7	43
PID_HIF1_TFPATHWAY	PID_MET_PATHWAY	0.614863	0	830	106	18	88
PID_HIF1_TFPATHWAY	PID_NCADHERINPATHWAY	0.863982	0	830	24	7	17
PID_HIF1_TFPATHWAY	PID_NETRIN_PATHWAY	0.981642	0	830	42	6	36
PID_HIF1_TFPATHWAY	PID_PI3KCIPATHWAY	0.849249	0	830	43	4	39
PID_HIF1_TFPATHWAY	PID_RET_PATHWAY	0.880616	0	830	36	10	26
PID_HIF1_TFPATHWAY	PID_TRKRPATHWAY	0.88755	0	830	74	11	63
PID_HIF1_TFPATHWAY	REACTOME_DOWNSTREAM_SIGNAL_TRANSDUCTION	0.775633	0	830	82	15	67
PID_HIF1_TFPATHWAY	REACTOME_HEMOSTASIS	0.611558	0	830	189	22	167
PID_HIF1_TFPATHWAY	REACTOME_NGF_SIGNALLING_VIA_TRKA_FROM_THE_PLASMA_MEMBRANE	0.75312	0	830	95	15	80
PID_HIF1_TFPATHWAY	REACTOME_PLATELET_ACTIVATION_SIGNALING_AND_AGGREGATION	0.673905	0	830	70	10	60
PID_HIF1_TFPATHWAY	REACTOME_SIGNALING_BY_ERBB2	0.776094	0	830	97	17	80
PID_HIF1_TFPATHWAY	REACTOME_SIGNALING_BY_FGFR	0.721264	0	830	81	17	64
PID_HIF1_TFPATHWAY	REACTOME_SIGNALING_BY_RHO_GTPASES	0.722375	0	830	86	5	81
PID_HIF1_TFPATHWAY	REACTOME_SIGNALLING_BY_NGF	0.771064	0	830	140	20	120
PID_HIF2PATHWAY	BIOCARTA_MET_PATHWAY	0.69656	0	991	19	4	15
PID_HIF2PATHWAY	KEGG_GNRH_SIGNALING_PATHWAY	0.617294	0	991	28	5	23
PID_HIF2PATHWAY	KEGG_TIGHT_JUNCTION	0.627772	0	991	45	2	43
PID_HIF2PATHWAY	PID_CXCR4_PATHWAY	0.619785	0	991	34	10	24
PID_HIF2PATHWAY	PID_ECADHERIN_NASCENTAJ_PATHWAY	0.659356	0	991	17	0	17
PID_HIF2PATHWAY	PID_EPHBFWDPATHWAY	0.725521	0	991	26	2	24
PID_HIF2PATHWAY	PID_INSULIN_PATHWAY	0.699599	0	991	22	4	18
PID_HIF2PATHWAY	PID_MET_PATHWAY	0.659435	0	991	58	8	50
PID_HIF2PATHWAY	PID_PI3KCIPATHWAY	0.847475	0	991	24	2	22
PID_HIF2PATHWAY	PID_TRKRPATHWAY	0.692206	0	991	36	4	32
PID_HIF2PATHWAY	REACTOME_DOWNSTREAM_SIGNAL_TRANSDUCTION	0.705932	0	991	44	9	35
PID_HIF2PATHWAY	REACTOME_NGF_SIGNALLING_VIA_TRKA_FROM_THE_PLASMA_MEMBRANE	0.669353	0	991	50	9	41
PID_HIF2PATHWAY	REACTOME_SIGNALING_BY_EGFR_IN_CANCER	0.628785	0	991	51	10	41
PID_HIF2PATHWAY	REACTOME_SIGNALING_BY_ERBB2	0.708541	0	991	53	11	42
PID_HIF2PATHWAY	REACTOME_SIGNALING_BY_FGFR_IN_DISEASE	0.644066	0	991	51	9	42
PID_HIF2PATHWAY	REACTOME_SIGNALING_BY_RHO_GTPASES	0.618227	0	991	36	1	35
PID_HIF2PATHWAY	REACTOME_SIGNALLING_BY_NGF	0.637859	0	991	70	10	60
PID_HIVNEFPATHWAY	KEGG_AXON_GUIDANCE	0.639382	0	585	33	3	30
PID_HNF3APATHWAY	PID_P38_MK2PATHWAY	0.87236	0	575	7	4	3
PID_HNF3BPATHWAY	KEGG_UBIQUITIN_MEDIATED_PROTEOLYSIS	0.65249	0	828	69	13	56
PID_HNF3BPATHWAY	PID_ERBB1_INTERNALIZATION_PATHWAY	0.79451	0	828	27	5	22
PID_IFNGPATHWAY	PID_RHOA_PATHWAY	0.700099	0	801	40	8	32
PID_IGF1_PATHWAY	KEGG_NEUROTROPHIN_SIGNALING_PATHWAY	0.729974	0	539	63	7	56
PID_IGF1_PATHWAY	KEGG_PATHWAYS_IN_CANCER	0.607022	0	539	125	16	109
PID_IGF1_PATHWAY	PID_PDGFRBPATHWAY	0.608189	0	539	96	11	85
PID_IGF1_PATHWAY	REACTOME_AXON_GUIDANCE	0.626509	0	539	125	13	112
PID_IL12_2PATHWAY	KEGG_ENDOCYTOSIS	0.619785	0	1325	19	1	18
PID_IL12_2PATHWAY	PID_FGF_PATHWAY	0.678127	0	1325	8	3	5
PID_IL12_2PATHWAY	REACTOME_SIGNALING_BY_RHO_GTPASES	0.663783	0	1325	11	1	10
PID_IL12_2PATHWAY	REACTOME_SIGNALING_BY_TGF_BETA_RECEPTOR_COMPLEX	0.650835	0	1325	6	4	2
PID_IL12_2PATHWAY	REACTOME_TRANSCRIPTIONAL_ACTIVITY_OF_SMAD2_SMAD3_SMAD4_HETEROTRIMER	0.735495	0	1325	2	2	0
PID_IL12_STAT4PATHWAY	KEGG_INSULIN_SIGNALING_PATHWAY	0.611128	0	1029	9	3	6
PID_IL12_STAT4PATHWAY	PID_CMYB_PATHWAY	0.82515	0	1029	5	0	5
PID_IL12_STAT4PATHWAY	PID_TGFBRPATHWAY	0.934875	0	1029	4	1	3
PID_IL12_STAT4PATHWAY	REACTOME_SIGNALING_BY_RHO_GTPASES	0.63692	0	1029	10	1	9
PID_IL23PATHWAY	KEGG_AXON_GUIDANCE	0.640195	0	657	13	1	12
PID_IL23PATHWAY	KEGG_PATHWAYS_IN_CANCER	0.607634	0	657	25	0	25
PID_IL2_1PATHWAY	KEGG_UBIQUITIN_MEDIATED_PROTEOLYSIS	0.69305	0	614	129	28	101
PID_IL2_1PATHWAY	REACTOME_ADAPTIVE_IMMUNE_SYSTEM	0.605198	0	614	329	36	293
PID_IL2_PI3KPATHWAY	KEGG_UBIQUITIN_MEDIATED_PROTEOLYSIS	0.681791	0	546	48	12	36
PID_IL2_STAT5PATHWAY	KEGG_MAPK_SIGNALING_PATHWAY	0.605845	0	629	67	12	55
PID_IL2_STAT5PATHWAY	KEGG_UBIQUITIN_MEDIATED_PROTEOLYSIS	0.741742	0	629	49	17	32
PID_IL2_STAT5PATHWAY	REACTOME_NGF_SIGNALLING_VIA_TRKA_FROM_THE_PLASMA_MEMBRANE	0.719836	0	629	47	11	36
PID_IL2_STAT5PATHWAY	REACTOME_SIGNALLING_BY_NGF	0.644703	0	629	70	13	57
PID_IL4_2PATHWAY	KEGG_AXON_GUIDANCE	0.689453	0	587	47	8	39
PID_IL4_2PATHWAY	KEGG_TIGHT_JUNCTION	0.676679	0	587	36	2	34
PID_IL4_2PATHWAY	REACTOME_SIGNALLING_BY_NGF	0.602003	0	587	83	17	66
PID_IL5_PATHWAY	KEGG_TGF_BETA_SIGNALING_PATHWAY	0.685264	0	1242	13	6	7
PID_IL5_PATHWAY	REACTOME_G1_PHASE	0.810764	0	1242	3	1	2
PID_IL6_7PATHWAY	REACTOME_NETRIN1_SIGNALING	0.981481	0	759	16	1	15
PID_IL8CXCR1_PATHWAY	KEGG_UBIQUITIN_MEDIATED_PROTEOLYSIS	0.704166	0	534	59	11	48
PID_IL8CXCR2_PATHWAY	KEGG_MAPK_SIGNALING_PATHWAY	0.628032	0	642	69	7	62
PID_IL8CXCR2_PATHWAY	KEGG_UBIQUITIN_MEDIATED_PROTEOLYSIS	0.630401	0	642	58	13	45
PID_ILK_PATHWAY	PID_PDGFRBPATHWAY	0.619614	0	651	144	21	123
PID_INSULIN_PATHWAY	PID_CMYB_PATHWAY	0.712199	0	825	68	7	61
PID_INTEGRIN3_PATHWAY	KEGG_TIGHT_JUNCTION	0.643133	0	1063	16	0	16
PID_INTEGRIN3_PATHWAY	PID_SMAD2_3NUCLEARPATHWAY	0.609583	0	1063	12	3	9
PID_INTEGRIN5_PATHWAY	KEGG_FC_GAMMA_R_MEDIATED_PHAGOCYTOSIS	0.844459	0	494	14	0	14
PID_INTEGRIN5_PATHWAY	KEGG_UBIQUITIN_MEDIATED_PROTEOLYSIS	0.668028	0	494	21	0	21
PID_INTEGRIN_A4B1_PATHWAY	KEGG_UBIQUITIN_MEDIATED_PROTEOLYSIS	0.625452	0	572	26	3	23
PID_KITPATHWAY	KEGG_REGULATION_OF_ACTIN_CYTOSKELETON	0.660354	0	622	179	30	149
PID_KITPATHWAY	PID_CMYB_PATHWAY	0.789226	0	622	89	8	81
PID_KITPATHWAY	PID_MET_PATHWAY	0.765981	0	622	133	21	112
PID_KITPATHWAY	PID_TGFBRPATHWAY	0.795135	0	622	109	19	90
PID_KITPATHWAY	REACTOME_SIGNALLING_BY_NGF	0.611678	0	622	174	25	149
PID_LIS1PATHWAY	PID_PI3KCIAKTPATHWAY	0.787637	0	1153	16	1	15
PID_LKB1_PATHWAY	KEGG_ENDOCYTOSIS	0.645363	0	645	134	12	122
PID_LKB1_PATHWAY	KEGG_UBIQUITIN_MEDIATED_PROTEOLYSIS	0.687528	0	645	123	15	108
PID_LKB1_PATHWAY	REACTOME_SIGNALING_BY_RHO_GTPASES	0.730794	0	645	74	7	67
PID_LPA4_PATHWAY	KEGG_FOCAL_ADHESION	0.639383	0	616	32	6	26
PID_LPA4_PATHWAY	KEGG_PATHWAYS_IN_CANCER	0.622133	0	616	49	8	41
PID_LPA4_PATHWAY	KEGG_RENAL_CELL_CARCINOMA	0.698917	0	616	17	6	11
PID_LPA4_PATHWAY	KEGG_UBIQUITIN_MEDIATED_PROTEOLYSIS	0.64695	0	616	38	7	31
PID_LPA4_PATHWAY	PID_PI3KCIPATHWAY	0.848407	0	616	13	2	11
PID_LYMPHANGIOGENESIS_PATHWAY	KEGG_REGULATION_OF_ACTIN_CYTOSKELETON	0.630209	0	690	90	15	75
PID_LYMPHANGIOGENESIS_PATHWAY	KEGG_UBIQUITIN_MEDIATED_PROTEOLYSIS	0.649344	0	690	75	21	54
PID_LYMPHANGIOGENESIS_PATHWAY	REACTOME_NGF_SIGNALLING_VIA_TRKA_FROM_THE_PLASMA_MEMBRANE	0.705384	0	690	56	5	51
PID_MET_PATHWAY	KEGG_UBIQUITIN_MEDIATED_PROTEOLYSIS	0.70684	0	601	286	48	238
PID_MTOR_4PATHWAY	KEGG_UBIQUITIN_MEDIATED_PROTEOLYSIS	0.726743	0	689	201	42	159
PID_MTOR_4PATHWAY	REACTOME_SIGNALING_BY_EGFR_IN_CANCER	0.616235	0	689	147	27	120
PID_MYC_ACTIVPATHWAY	KEGG_OOCYTE_MEIOSIS	0.651722	0	721	63	6	57
PID_MYC_PATHWAY	KEGG_NEUROTROPHIN_SIGNALING_PATHWAY	0.600018	0	617	28	1	27
PID_MYC_PATHWAY	KEGG_UBIQUITIN_MEDIATED_PROTEOLYSIS	0.671851	0	617	49	4	45
PID_MYC_REPRESSPATHWAY	KEGG_UBIQUITIN_MEDIATED_PROTEOLYSIS	0.633829	0	609	128	14	114
PID_NCADHERINPATHWAY	KEGG_MAPK_SIGNALING_PATHWAY	0.654351	0	673	83	14	69
PID_NCADHERINPATHWAY	KEGG_PATHWAYS_IN_CANCER	0.774885	0	673	104	18	86
PID_NCADHERINPATHWAY	KEGG_UBIQUITIN_MEDIATED_PROTEOLYSIS	0.638516	0	673	61	17	44
PID_NEPHRIN_NEPH1_PATHWAY	REACTOME_SIGNALLING_BY_NGF	0.601732	0	534	82	7	75
PID_NETRIN_PATHWAY	KEGG_UBIQUITIN_MEDIATED_PROTEOLYSIS	0.684154	0	569	98	14	84
PID_NFAT_3PATHWAY	KEGG_INSULIN_SIGNALING_PATHWAY	0.630662	0	676	88	12	76
PID_NFAT_3PATHWAY	KEGG_UBIQUITIN_MEDIATED_PROTEOLYSIS	0.671704	0	676	121	12	109
PID_NFAT_3PATHWAY	PID_CMYB_PATHWAY	0.818539	0	676	62	3	59
PID_NFAT_3PATHWAY	REACTOME_SIGNALING_BY_TGF_BETA_RECEPTOR_COMPLEX	0.792347	0	676	67	12	55
PID_NFAT_TFPATHWAY	PID_MET_PATHWAY	0.671863	0	725	39	8	31
PID_NFKAPPABATYPICALPATHWAY	PID_INSULIN_GLUCOSE_PATHWAY	0.811447	0	609	2	0	2
PID_NOTCH_PATHWAY	KEGG_UBIQUITIN_MEDIATED_PROTEOLYSIS	0.704747	0	539	188	26	162
PID_P38ALPHABETADOWNSTREAMPATHWAY	KEGG_FOCAL_ADHESION	0.628067	0	678	58	11	47
PID_P38ALPHABETADOWNSTREAMPATHWAY	KEGG_MELANOGENESIS	0.732189	0	678	40	5	35
PID_P38_MKK3_6PATHWAY	KEGG_REGULATION_OF_ACTIN_CYTOSKELETON	0.722995	0	637	83	3	80
PID_P38_MKK3_6PATHWAY	PID_PDGFRBPATHWAY	0.657752	0	637	85	1	84
PID_P38_MKK3_6PATHWAY	REACTOME_NGF_SIGNALLING_VIA_TRKA_FROM_THE_PLASMA_MEMBRANE	0.672906	0	637	57	1	56
PID_P38_MKK3_6PATHWAY	REACTOME_SIGNALLING_BY_NGF	0.628435	0	637	86	3	83
PID_P53DOWNSTREAMPATHWAY	KEGG_OOCYTE_MEIOSIS	0.643327	0	589	99	12	87
PID_P53DOWNSTREAMPATHWAY	PID_PDGFRBPATHWAY	0.630486	0	589	173	16	157
PID_PDGFRBPATHWAY	KEGG_UBIQUITIN_MEDIATED_PROTEOLYSIS	0.693835	0	618	283	51	232
PID_PI3KCIAKTPATHWAY	KEGG_UBIQUITIN_MEDIATED_PROTEOLYSIS	0.679648	0	753	86	23	63
PID_PI3KCIAKTPATHWAY	PID_CMYB_PATHWAY	0.810807	0	753	49	6	43
PID_PI3KPLCTRKPATHWAY	KEGG_UBIQUITIN_MEDIATED_PROTEOLYSIS	0.703154	0	597	126	25	101
PID_PI3KPLCTRKPATHWAY	PID_CMYB_PATHWAY	0.768901	0	597	75	6	69
PID_PLK1_PATHWAY	PID_HIF1_TFPATHWAY	0.610787	0	1024	32	11	21
PID_PRLSIGNALINGEVENTSPATHWAY	SIG_CHEMOTAXIS	0.604345	0	1563	10	1	9
PID_RAC1_REG_PATHWAY	KEGG_REGULATION_OF_ACTIN_CYTOSKELETON	0.610805	0	992	80	6	74
PID_RAC1_REG_PATHWAY	KEGG_UBIQUITIN_MEDIATED_PROTEOLYSIS	0.672991	0	992	46	6	40
PID_RAC1_REG_PATHWAY	PID_MYC_ACTIVPATHWAY	0.657949	0	992	18	3	15
PID_RANBP2PATHWAY	KEGG_NEUROTROPHIN_SIGNALING_PATHWAY	0.652744	0	761	18	1	17
PID_RANBP2PATHWAY	PID_ECADHERIN_NASCENTAJ_PATHWAY	0.786768	0	761	9	1	8
PID_RANBP2PATHWAY	PID_MET_PATHWAY	0.676371	0	761	23	2	21
PID_RANBP2PATHWAY	REACTOME_NEUROTRANSMITTER_RECEPTOR_BINDING_AND_DOWNSTREAM_TRANSMISSION_IN_THE_POSTSYNAPTIC_CELL	0.786309	0	761	12	2	10
PID_RANBP2PATHWAY	REACTOME_NGF_SIGNALLING_VIA_TRKA_FROM_THE_PLASMA_MEMBRANE	0.600759	0	761	18	3	15
PID_RANBP2PATHWAY	REACTOME_TRANSMISSION_ACROSS_CHEMICAL_SYNAPSES	0.79758	0	761	15	2	13
PID_RAS_PATHWAY	KEGG_NEUROTROPHIN_SIGNALING_PATHWAY	0.661605	0	513	47	0	47
PID_RAS_PATHWAY	KEGG_UBIQUITIN_MEDIATED_PROTEOLYSIS	0.720533	0	513	75	7	68
PID_RAS_PATHWAY	PID_ERBB1_INTERNALIZATION_PATHWAY	0.791973	0	513	22	2	20
PID_RAS_PATHWAY	REACTOME_NGF_SIGNALLING_VIA_TRKA_FROM_THE_PLASMA_MEMBRANE	0.717084	0	513	59	3	56
PID_RAS_PATHWAY	REACTOME_SIGNALLING_BY_NGF	0.6725	0	513	84	3	81
PID_RB_1PATHWAY	KEGG_AXON_GUIDANCE	0.607838	0	622	65	7	58
PID_RB_1PATHWAY	PID_CXCR4_PATHWAY	0.788427	0	622	44	9	35
PID_RB_1PATHWAY	PID_PDGFRBPATHWAY	0.731367	0	622	90	10	80
PID_RB_1PATHWAY	REACTOME_PLATELET_ACTIVATION_SIGNALING_AND_AGGREGATION	0.621645	0	622	58	4	54
PID_RB_1PATHWAY	REACTOME_SIGNALLING_BY_NGF	0.610651	0	622	97	7	90
PID_REELINPATHWAY	KEGG_ENDOCYTOSIS	0.640117	0	987	83	8	75
PID_REELINPATHWAY	KEGG_OOCYTE_MEIOSIS	0.668359	0	987	40	8	32
PID_REELINPATHWAY	PID_MTOR_4PATHWAY	0.615058	0	987	52	9	43
PID_REG_GR_PATHWAY	PID_MET_PATHWAY	0.698352	0	600	153	19	134
PID_REG_GR_PATHWAY	PID_MTOR_4PATHWAY	0.79449	0	600	101	15	86
PID_REG_GR_PATHWAY	PID_PDGFRBPATHWAY	0.678735	0	600	160	17	143
PID_RETINOIC_ACID_PATHWAY	KEGG_ENDOCYTOSIS	0.72723	0	552	94	8	86
PID_RETINOIC_ACID_PATHWAY	KEGG_NEUROTROPHIN_SIGNALING_PATHWAY	0.616848	0	552	49	10	39
PID_RETINOIC_ACID_PATHWAY	PID_TRKRPATHWAY	0.722979	0	552	41	8	33
PID_RET_PATHWAY	KEGG_PATHWAYS_IN_CANCER	0.67258	0	697	149	25	124
PID_RET_PATHWAY	KEGG_UBIQUITIN_MEDIATED_PROTEOLYSIS	0.672492	0	697	108	30	78
PID_RHOA_REG_PATHWAY	KEGG_ENDOCYTOSIS	0.71649	0	657	105	10	95
PID_RHOA_REG_PATHWAY	PID_ERBB1_INTERNALIZATION_PATHWAY	0.798908	0	657	33	4	29
PID_RXR_VDR_PATHWAY	KEGG_ENDOCYTOSIS	0.648021	0	444	75	5	70
PID_S1P_META_PATHWAY	KEGG_ENDOCYTOSIS	0.658411	0	703	39	2	37
PID_S1P_META_PATHWAY	KEGG_MAPK_SIGNALING_PATHWAY	0.614591	0	703	55	5	50
PID_S1P_S1P2_PATHWAY	PID_RB_1PATHWAY	0.849649	0	769	16	1	15
PID_S1P_S1P3_PATHWAY	KEGG_ENDOCYTOSIS	0.687912	0	854	71	6	65
PID_S1P_S1P4_PATHWAY	KEGG_UBIQUITIN_MEDIATED_PROTEOLYSIS	0.659477	0	852	42	11	31
PID_SHP2_PATHWAY	KEGG_UBIQUITIN_MEDIATED_PROTEOLYSIS	0.765816	0	581	109	17	92
PID_SMAD2_3NUCLEARPATHWAY	PID_PDGFRBPATHWAY	0.664919	0	626	227	21	206
PID_SMAD2_3NUCLEARPATHWAY	PID_PI3KCIPATHWAY	0.862352	0	626	83	6	77
PID_SMAD2_3PATHWAY	KEGG_ENDOCYTOSIS	0.622723	0	603	119	10	109
PID_SMAD2_3PATHWAY	PID_TGFBRPATHWAY	0.741462	0	603	67	8	59
PID_SMAD2_3PATHWAY	REACTOME_NGF_SIGNALLING_VIA_TRKA_FROM_THE_PLASMA_MEMBRANE	0.605014	0	603	72	6	66
PID_SYNDECAN_2_PATHWAY	KEGG_ENDOCYTOSIS	0.732458	0	748	100	5	95
PID_SYNDECAN_2_PATHWAY	KEGG_MAPK_SIGNALING_PATHWAY	0.636983	0	748	94	4	90
PID_TAP63PATHWAY	KEGG_UBIQUITIN_MEDIATED_PROTEOLYSIS	0.665454	0	626	81	15	66
PID_TAP63PATHWAY	KEGG_WNT_SIGNALING_PATHWAY	0.808562	0	626	75	8	67
PID_TAP63PATHWAY	PID_MTOR_4PATHWAY	0.652431	0	626	54	10	44
PID_TCPTP_PATHWAY	KEGG_OOCYTE_MEIOSIS	0.722097	0	590	47	4	43
PID_TCPTP_PATHWAY	REACTOME_SIGNALLING_BY_NGF	0.662809	0	590	103	6	97
PID_TCRCALCIUMPATHWAY	KEGG_GLIOMA	0.728988	0	1111	6	2	4
PID_TCRCALCIUMPATHWAY	PID_EPHA_FWDPATHWAY	0.820348	0	1111	4	0	4
PID_TCRJNKPATHWAY	KEGG_TIGHT_JUNCTION	0.705071	0	647	31	0	31
PID_TCRJNKPATHWAY	PID_ER_NONGENOMIC_PATHWAY	0.961295	0	647	24	0	24
PID_TCRJNKPATHWAY	PID_PDGFRBPATHWAY	0.714524	0	647	51	2	49
PID_TCRRASPATHWAY	KEGG_ENDOCYTOSIS	0.821882	0	581	53	4	49
PID_TCRRASPATHWAY	KEGG_NEUROTROPHIN_SIGNALING_PATHWAY	0.621674	0	581	17	3	14
PID_TCRRASPATHWAY	PID_PDGFRBPATHWAY	0.675983	0	581	42	4	38
PID_TCR_PATHWAY	KEGG_REGULATION_OF_ACTIN_CYTOSKELETON	0.64512	0	779	108	22	86
PID_TCR_PATHWAY	PID_HIF1_TFPATHWAY	0.70317	0	779	40	9	31
PID_THROMBIN_PAR1_PATHWAY	KEGG_UBIQUITIN_MEDIATED_PROTEOLYSIS	0.682978	0	912	69	8	61
PID_THROMBIN_PAR4_PATHWAY	PID_ERBB1_INTERNALIZATION_PATHWAY	0.709579	0	1095	20	3	17
PID_TNFPATHWAY	PID_CMYB_PATHWAY	0.775421	0	632	37	1	36
PID_TNFPATHWAY	PID_SMAD2_3NUCLEARPATHWAY	0.832461	0	632	60	3	57
PID_TRAIL_PATHWAY	KEGG_OOCYTE_MEIOSIS	0.638003	0	591	31	1	30
PID_TRAIL_PATHWAY	PID_TGFBRPATHWAY	0.738047	0	591	33	2	31
PID_TRKRPATHWAY	KEGG_UBIQUITIN_MEDIATED_PROTEOLYSIS	0.729124	0	657	152	27	125
PID_VEGFR1_2_PATHWAY	KEGG_UBIQUITIN_MEDIATED_PROTEOLYSIS	0.719755	0	618	172	38	134
PID_VEGFR1_PATHWAY	KEGG_PATHWAYS_IN_CANCER	0.694113	0	617	165	30	135
PID_VEGFR1_PATHWAY	KEGG_REGULATION_OF_ACTIN_CYTOSKELETON	0.663875	0	617	131	26	105
PID_VEGFR1_PATHWAY	KEGG_UBIQUITIN_MEDIATED_PROTEOLYSIS	0.667714	0	617	102	31	71
PID_VEGF_VEGFR_PATHWAY	KEGG_CHRONIC_MYELOID_LEUKEMIA	0.629689	0	1346	9	2	7
PID_WNT_CANONICAL_PATHWAY	KEGG_LONG_TERM_DEPRESSION	0.887035	0	624	35	2	33
PID_WNT_NONCANONICAL_PATHWAY	KEGG_UBIQUITIN_MEDIATED_PROTEOLYSIS	0.649788	0	671	74	2	72
PID_WNT_SIGNALING_PATHWAY	KEGG_UBIQUITIN_MEDIATED_PROTEOLYSIS	0.657239	0	747	30	1	29
PID_WNT_SIGNALING_PATHWAY	KEGG_WNT_SIGNALING_PATHWAY	0.628263	0	747	22	2	20
REACTOME_3_UTR_MEDIATED_TRANSLATIONAL_REGULATION	KEGG_OOCYTE_MEIOSIS	0.639244	0	907	12	2	10
REACTOME_3_UTR_MEDIATED_TRANSLATIONAL_REGULATION	PID_BETACATENIN_NUC_PATHWAY	0.733438	0	907	9	1	8
REACTOME_3_UTR_MEDIATED_TRANSLATIONAL_REGULATION	PID_MTOR_4PATHWAY	0.730001	0	907	17	1	16
REACTOME_3_UTR_MEDIATED_TRANSLATIONAL_REGULATION	REACTOME_DOWNSTREAM_SIGNALING_OF_ACTIVATED_FGFR	0.651375	0	907	7	2	5
REACTOME_3_UTR_MEDIATED_TRANSLATIONAL_REGULATION	REACTOME_DOWNSTREAM_SIGNAL_TRANSDUCTION	0.663647	0	907	11	2	9
REACTOME_3_UTR_MEDIATED_TRANSLATIONAL_REGULATION	REACTOME_SIGNALING_BY_EGFR_IN_CANCER	0.607395	0	907	13	2	11
REACTOME_3_UTR_MEDIATED_TRANSLATIONAL_REGULATION	REACTOME_SIGNALING_BY_ERBB2	0.653864	0	907	11	2	9
REACTOME_3_UTR_MEDIATED_TRANSLATIONAL_REGULATION	REACTOME_SIGNALING_BY_PDGF	0.677634	0	907	11	2	9
REACTOME_ABORTIVE_ELONGATION_OF_HIV1_TRANSCRIPT_IN_THE_ABSENCE_OF_TAT	KEGG_ENDOCYTOSIS	0.644061	0	904	10	0	10
REACTOME_ACTIVATED_AMPK_STIMULATES_FATTY_ACID_OXIDATION_IN_MUSCLE	BIOCARTA_MAL_PATHWAY	0.789497	0	1459	4	0	4
REACTOME_ACTIVATED_AMPK_STIMULATES_FATTY_ACID_OXIDATION_IN_MUSCLE	PID_MTOR_4PATHWAY	0.665441	0	1459	12	1	11
REACTOME_ACTIVATION_OF_BH3_ONLY_PROTEINS	KEGG_UBIQUITIN_MEDIATED_PROTEOLYSIS	0.634317	0	916	23	6	17
REACTOME_ACTIVATION_OF_BH3_ONLY_PROTEINS	REACTOME_TRANS_GOLGI_NETWORK_VESICLE_BUDDING	0.720096	0	916	10	0	10
REACTOME_ACTIVATION_OF_CHAPERONE_GENES_BY_ATF6_ALPHA	PID_HIF1_TFPATHWAY	0.637281	0	666	5	0	5
REACTOME_ACTIVATION_OF_GENES_BY_ATF4	KEGG_NEUROTROPHIN_SIGNALING_PATHWAY	0.618754	0	636	23	1	22
REACTOME_ACTIVATION_OF_GENES_BY_ATF4	PID_LKB1_PATHWAY	0.835728	0	636	12	0	12
REACTOME_ACTIVATION_OF_GENES_BY_ATF4	PID_MTOR_4PATHWAY	0.691924	0	636	17	2	15
REACTOME_ACTIVATION_OF_GENES_BY_ATF4	PID_PDGFRBPATHWAY	0.620363	0	636	28	2	26
REACTOME_ACTIVATION_OF_KAINATE_RECEPTORS_UPON_GLUTAMATE_BINDING	REACTOME_SIGNALING_BY_HIPPO	0.96838	0	887	6	0	6
REACTOME_ACTIVATION_OF_NF_KAPPAB_IN_B_CELLS	KEGG_INSULIN_SIGNALING_PATHWAY	0.601853	0	929	31	5	26
REACTOME_ACTIVATION_OF_NF_KAPPAB_IN_B_CELLS	PID_LKB1_PATHWAY	0.867004	0	929	20	1	19
REACTOME_ACTIVATION_OF_NF_KAPPAB_IN_B_CELLS	PID_MTOR_4PATHWAY	0.772302	0	929	27	4	23
REACTOME_ACTIVATION_OF_NF_KAPPAB_IN_B_CELLS	SIG_INSULIN_RECEPTOR_PATHWAY_IN_CARDIAC_MYOCYTES	0.7012	0	929	15	2	13
REACTOME_ACTIVATION_OF_NMDA_RECEPTOR_UPON_GLUTAMATE_BINDING_AND_POSTSYNAPTIC_EVENTS	PID_CMYB_PATHWAY	0.689579	0	806	36	7	29
REACTOME_ACTIVATION_OF_RAC	KEGG_RENAL_CELL_CARCINOMA	0.617033	0	1285	14	2	12
REACTOME_ACTIVATION_OF_THE_AP1_FAMILY_OF_TRANSCRIPTION_FACTORS	PID_PDGFRBPATHWAY	0.771937	0	585	18	4	14
REACTOME_ACTIVATION_OF_THE_AP1_FAMILY_OF_TRANSCRIPTION_FACTORS	PID_TGFBRPATHWAY	0.738511	0	585	12	2	10
REACTOME_ACTIVATION_OF_THE_MRNA_UPON_BINDING_OF_THE_CAP_BINDING_COMPLEX_AND_EIFS_AND_SUBSEQUENT_BINDING_TO_43S	KEGG_OOCYTE_MEIOSIS	0.687443	0	937	12	2	10
REACTOME_ACTIVATION_OF_THE_MRNA_UPON_BINDING_OF_THE_CAP_BINDING_COMPLEX_AND_EIFS_AND_SUBSEQUENT_BINDING_TO_43S	PID_FOXOPATHWAY	0.819948	0	937	6	0	6
REACTOME_ACTIVATION_OF_THE_MRNA_UPON_BINDING_OF_THE_CAP_BINDING_COMPLEX_AND_EIFS_AND_SUBSEQUENT_BINDING_TO_43S	REACTOME_DOWNSTREAM_SIGNAL_TRANSDUCTION	0.613456	0	937	11	2	9
REACTOME_ACTIVATION_OF_THE_MRNA_UPON_BINDING_OF_THE_CAP_BINDING_COMPLEX_AND_EIFS_AND_SUBSEQUENT_BINDING_TO_43S	REACTOME_OPIOID_SIGNALLING	0.628643	0	937	7	3	4
REACTOME_ACTIVATION_OF_THE_MRNA_UPON_BINDING_OF_THE_CAP_BINDING_COMPLEX_AND_EIFS_AND_SUBSEQUENT_BINDING_TO_43S	REACTOME_SIGNALING_BY_PDGF	0.624538	0	937	11	2	9
REACTOME_ACYL_CHAIN_REMODELLING_OF_PC	KEGG_PATHWAYS_IN_CANCER	0.617652	0	439	2	0	2
REACTOME_ACYL_CHAIN_REMODELLING_OF_PE	KEGG_PATHWAYS_IN_CANCER	0.617652	0	439	2	0	2
REACTOME_ADAPTIVE_IMMUNE_SYSTEM	KEGG_AXON_GUIDANCE	0.814336	0	576	514	52	462
REACTOME_ADENYLATE_CYCLASE_ACTIVATING_PATHWAY	PID_ERBB1_DOWNSTREAM_PATHWAY	0.677159	0	1021	4	1	3
REACTOME_ADENYLATE_CYCLASE_ACTIVATING_PATHWAY	PID_RHOA_PATHWAY	0.681063	0	1021	2	0	2
REACTOME_ADENYLATE_CYCLASE_INHIBITORY_PATHWAY	KEGG_ADHERENS_JUNCTION	0.75817	0	989	11	1	10
REACTOME_ADENYLATE_CYCLASE_INHIBITORY_PATHWAY	KEGG_COLORECTAL_CANCER	0.726408	0	989	7	0	7
REACTOME_ADENYLATE_CYCLASE_INHIBITORY_PATHWAY	KEGG_MELANOGENESIS	0.917038	0	989	12	0	12
REACTOME_ADENYLATE_CYCLASE_INHIBITORY_PATHWAY	PID_CDC42_PATHWAY	0.733911	0	989	14	0	14
REACTOME_ADENYLATE_CYCLASE_INHIBITORY_PATHWAY	PID_ERBB1_DOWNSTREAM_PATHWAY	0.642864	0	989	21	2	19
REACTOME_ADENYLATE_CYCLASE_INHIBITORY_PATHWAY	PID_MET_PATHWAY	0.605418	0	989	17	2	15
REACTOME_ADP_SIGNALLING_THROUGH_P2RY12	KEGG_MAPK_SIGNALING_PATHWAY	0.657356	0	613	33	2	31
REACTOME_ADP_SIGNALLING_THROUGH_P2RY12	KEGG_REGULATION_OF_ACTIN_CYTOSKELETON	0.66673	0	613	34	2	32
REACTOME_ADP_SIGNALLING_THROUGH_P2RY12	KEGG_UBIQUITIN_MEDIATED_PROTEOLYSIS	0.678546	0	613	25	1	24
REACTOME_ADP_SIGNALLING_THROUGH_P2RY12	REACTOME_SIGNALING_BY_BMP	0.992792	0	613	9	2	7
REACTOME_ADVANCED_GLYCOSYLATION_ENDPRODUCT_RECEPTOR_SIGNALING	KEGG_PATHWAYS_IN_CANCER	0.600049	0	609	41	5	36
REACTOME_ADVANCED_GLYCOSYLATION_ENDPRODUCT_RECEPTOR_SIGNALING	KEGG_REGULATION_OF_ACTIN_CYTOSKELETON	0.66452	0	609	32	4	28
REACTOME_AKT_PHOSPHORYLATES_TARGETS_IN_THE_CYTOSOL	BIOCARTA_MAPK_PATHWAY	0.650461	0	1102	5	0	5
REACTOME_AMINE_COMPOUND_SLC_TRANSPORTERS	KEGG_AXON_GUIDANCE	0.620746	0	569	1	0	1
REACTOME_AMINO_ACID_AND_OLIGOPEPTIDE_SLC_TRANSPORTERS	KEGG_REGULATION_OF_ACTIN_CYTOSKELETON	0.673484	0	669	37	0	37
REACTOME_AMINO_ACID_AND_OLIGOPEPTIDE_SLC_TRANSPORTERS	PID_CXCR4_PATHWAY	0.609406	0	669	18	1	17
REACTOME_AMINO_ACID_AND_OLIGOPEPTIDE_SLC_TRANSPORTERS	PID_MTOR_4PATHWAY	0.744135	0	669	22	1	21
REACTOME_AMINO_ACID_AND_OLIGOPEPTIDE_SLC_TRANSPORTERS	PID_PDGFRBPATHWAY	0.620022	0	669	33	1	32
REACTOME_AMINO_ACID_AND_OLIGOPEPTIDE_SLC_TRANSPORTERS	PID_RHOA_PATHWAY	0.749252	0	669	8	0	8
REACTOME_AMINO_ACID_TRANSPORT_ACROSS_THE_PLASMA_MEMBRANE	PID_ERBB1_INTERNALIZATION_PATHWAY	0.764046	0	703	9	0	9
REACTOME_AMYLOIDS	BIOCARTA_CALCINEURIN_PATHWAY	0.770183	0	1057	0	0	0
REACTOME_AMYLOIDS	KEGG_MELANOGENESIS	0.648276	0	1057	3	0	3
REACTOME_AMYLOIDS	ST_PHOSPHOINOSITIDE_3_KINASE_PATHWAY	0.658743	0	1057	3	0	3
REACTOME_ANTIGEN_ACTIVATES_B_CELL_RECEPTOR_LEADING_TO_GENERATION_OF_SECOND_MESSENGERS	PID_SMAD2_3NUCLEARPATHWAY	0.646803	0	1264	30	6	24
REACTOME_ANTIGEN_PRESENTATION_FOLDING_ASSEMBLY_AND_PEPTIDE_LOADING_OF_CLASS_I_MHC	PID_HIF1_TFPATHWAY	0.620171	0	1005	19	0	19
REACTOME_ANTIGEN_PROCESSING_CROSS_PRESENTATION	KEGG_NEUROTROPHIN_SIGNALING_PATHWAY	0.647247	0	1005	22	1	21
REACTOME_ANTIGEN_PROCESSING_CROSS_PRESENTATION	KEGG_REGULATION_OF_ACTIN_CYTOSKELETON	0.605863	0	1005	35	2	33
REACTOME_ANTIGEN_PROCESSING_CROSS_PRESENTATION	PID_ERBB1_DOWNSTREAM_PATHWAY	0.62692	0	1005	28	2	26
REACTOME_ANTIGEN_PROCESSING_CROSS_PRESENTATION	PID_ERBB1_INTERNALIZATION_PATHWAY	0.664773	0	1005	7	1	6
REACTOME_ANTIGEN_PROCESSING_CROSS_PRESENTATION	PID_LKB1_PATHWAY	0.792709	0	1005	14	0	14
REACTOME_ANTIGEN_PROCESSING_CROSS_PRESENTATION	PID_NFAT_3PATHWAY	0.790021	0	1005	10	2	8
REACTOME_ANTIGEN_PROCESSING_CROSS_PRESENTATION	PID_PI3KPLCTRKPATHWAY	0.866811	0	1005	11	1	10
REACTOME_ANTIGEN_PROCESSING_CROSS_PRESENTATION	ST_PHOSPHOINOSITIDE_3_KINASE_PATHWAY	0.736415	0	1005	7	1	6
REACTOME_ANTIGEN_PROCESSING_UBIQUITINATION_PROTEASOME_DEGRADATION	PID_INSULIN_GLUCOSE_PATHWAY	0.787258	0	717	35	4	31
REACTOME_ANTIGEN_PROCESSING_UBIQUITINATION_PROTEASOME_DEGRADATION	PID_NFAT_3PATHWAY	0.74119	0	717	111	10	101
REACTOME_ANTIVIRAL_MECHANISM_BY_IFN_STIMULATED_GENES	PID_TGFBRPATHWAY	0.794686	0	848	87	15	72
REACTOME_APC_CDC20_MEDIATED_DEGRADATION_OF_NEK2A	KEGG_OOCYTE_MEIOSIS	0.604616	0	1205	10	2	8
REACTOME_APC_CDC20_MEDIATED_DEGRADATION_OF_NEK2A	PID_NFAT_3PATHWAY	0.65233	0	1205	7	2	5
REACTOME_APC_C_CDC20_MEDIATED_DEGRADATION_OF_CYCLIN_B	KEGG_AXON_GUIDANCE	0.619795	0	1118	8	1	7
REACTOME_APC_C_CDC20_MEDIATED_DEGRADATION_OF_CYCLIN_B	KEGG_OOCYTE_MEIOSIS	0.600591	0	1118	10	2	8
REACTOME_APC_C_CDC20_MEDIATED_DEGRADATION_OF_CYCLIN_B	PID_INSULIN_GLUCOSE_PATHWAY	0.746035	0	1118	2	1	1
REACTOME_APC_C_CDC20_MEDIATED_DEGRADATION_OF_CYCLIN_B	PID_NFAT_3PATHWAY	0.682096	0	1118	8	3	5
REACTOME_APC_C_CDC20_MEDIATED_DEGRADATION_OF_CYCLIN_B	REACTOME_SIGNALING_BY_RHO_GTPASES	0.629111	0	1118	13	2	11
REACTOME_APC_C_CDC20_MEDIATED_DEGRADATION_OF_CYCLIN_B	REACTOME_SPHINGOLIPID_DE_NOVO_BIOSYNTHESIS	0.892838	0	1118	2	0	2
REACTOME_APC_C_CDC20_MEDIATED_DEGRADATION_OF_CYCLIN_B	REACTOME_TRANS_GOLGI_NETWORK_VESICLE_BUDDING	0.640007	0	1118	15	2	13
REACTOME_APC_C_CDC20_MEDIATED_DEGRADATION_OF_MITOTIC_PROTEINS	PID_FOXOPATHWAY	0.661809	0	1312	9	2	7
REACTOME_APC_C_CDC20_MEDIATED_DEGRADATION_OF_MITOTIC_PROTEINS	PID_NFAT_3PATHWAY	0.675754	0	1312	13	5	8
REACTOME_APC_C_CDC20_MEDIATED_DEGRADATION_OF_MITOTIC_PROTEINS	PID_PI3KCIAKTPATHWAY	0.662887	0	1312	12	1	11
REACTOME_APC_C_CDH1_MEDIATED_DEGRADATION_OF_CDC20_AND_OTHER_APC_C_CDH1_TARGETED_PROTEINS_IN_LATE_MITOSIS_EARLY_G1	KEGG_T_CELL_RECEPTOR_SIGNALING_PATHWAY	0.634207	0	1405	16	3	13
REACTOME_APC_C_CDH1_MEDIATED_DEGRADATION_OF_CDC20_AND_OTHER_APC_C_CDH1_TARGETED_PROTEINS_IN_LATE_MITOSIS_EARLY_G1	PID_NFAT_3PATHWAY	0.669255	0	1405	12	4	8
REACTOME_APOBEC3G_MEDIATED_RESISTANCE_TO_HIV1_INFECTION	KEGG_ADHERENS_JUNCTION	0.825853	0	562	2	0	2
REACTOME_APOBEC3G_MEDIATED_RESISTANCE_TO_HIV1_INFECTION	KEGG_OOCYTE_MEIOSIS	0.70143	0	562	0	0	0
REACTOME_APOBEC3G_MEDIATED_RESISTANCE_TO_HIV1_INFECTION	PID_NFAT_3PATHWAY	0.824228	0	562	0	0	0
REACTOME_APOPTOSIS	KEGG_UBIQUITIN_MEDIATED_PROTEOLYSIS	0.64676	0	641	196	39	157
REACTOME_APOPTOSIS_INDUCED_DNA_FRAGMENTATION	PID_PI3KCIAKTPATHWAY	0.890585	0	944	4	1	3
REACTOME_APOPTOTIC_CLEAVAGE_OF_CELLULAR_PROTEINS	BIOCARTA_ALK_PATHWAY	0.916584	0	632	28	6	22
REACTOME_APOPTOTIC_CLEAVAGE_OF_CELLULAR_PROTEINS	PID_CMYB_PATHWAY	0.72527	0	632	36	3	33
REACTOME_APOPTOTIC_CLEAVAGE_OF_CELLULAR_PROTEINS	REACTOME_DOWNREGULATION_OF_SMAD2_3_SMAD4_TRANSCRIPTIONAL_ACTIVITY	0.975052	0	632	19	2	17
REACTOME_APOPTOTIC_CLEAVAGE_OF_CELL_ADHESION_PROTEINS	KEGG_AXON_GUIDANCE	0.602873	0	675	16	2	14
REACTOME_APOPTOTIC_CLEAVAGE_OF_CELL_ADHESION_PROTEINS	KEGG_MELANOGENESIS	0.81072	0	675	11	1	10
REACTOME_APOPTOTIC_EXECUTION_PHASE	PID_CMYB_PATHWAY	0.752045	0	643	49	5	44
REACTOME_AQUAPORIN_MEDIATED_TRANSPORT	KEGG_MAPK_SIGNALING_PATHWAY	0.728184	0	419	56	2	54
REACTOME_ASPARAGINE_N_LINKED_GLYCOSYLATION	KEGG_PATHWAYS_IN_CANCER	0.600724	0	521	183	5	178
REACTOME_ASPARAGINE_N_LINKED_GLYCOSYLATION	REACTOME_SIGNALLING_BY_NGF	0.644535	0	521	147	3	144
REACTOME_ASSEMBLY_OF_THE_PRE_REPLICATIVE_COMPLEX	PID_LKB1_PATHWAY	0.670223	0	1056	8	0	8
REACTOME_ASSEMBLY_OF_THE_PRE_REPLICATIVE_COMPLEX	PID_MYC_REPRESSPATHWAY	0.73106	0	1056	4	1	3
REACTOME_ASSOCIATION_OF_TRIC_CCT_WITH_TARGET_PROTEINS_DURING_BIOSYNTHESIS	KEGG_NEUROTROPHIN_SIGNALING_PATHWAY	0.654504	0	647	34	6	28
REACTOME_ASSOCIATION_OF_TRIC_CCT_WITH_TARGET_PROTEINS_DURING_BIOSYNTHESIS	KEGG_REGULATION_OF_ACTIN_CYTOSKELETON	0.625887	0	647	57	5	52
REACTOME_ASSOCIATION_OF_TRIC_CCT_WITH_TARGET_PROTEINS_DURING_BIOSYNTHESIS	KEGG_UBIQUITIN_MEDIATED_PROTEOLYSIS	0.67364	0	647	54	6	48
REACTOME_ASSOCIATION_OF_TRIC_CCT_WITH_TARGET_PROTEINS_DURING_BIOSYNTHESIS	PID_MET_PATHWAY	0.710527	0	647	54	4	50
REACTOME_AUTODEGRADATION_OF_CDH1_BY_CDH1_APC_C	PID_INSULIN_GLUCOSE_PATHWAY	0.741678	0	1510	3	1	2
REACTOME_AXON_GUIDANCE	KEGG_UBIQUITIN_MEDIATED_PROTEOLYSIS	0.737344	0	600	320	49	271
REACTOME_BASE_EXCISION_REPAIR	KEGG_NEUROTROPHIN_SIGNALING_PATHWAY	0.603153	0	585	7	2	5
REACTOME_BASE_EXCISION_REPAIR	PID_MTOR_4PATHWAY	0.737528	0	585	9	0	9
REACTOME_BASE_EXCISION_REPAIR	PID_PDGFRBPATHWAY	0.660354	0	585	13	1	12
REACTOME_BASE_FREE_SUGAR_PHOSPHATE_REMOVAL_VIA_THE_SINGLE_NUCLEOTIDE_REPLACEMENT_PATHWAY	PID_PDGFRBPATHWAY	0.660354	0	585	13	1	12
REACTOME_BIOSYNTHESIS_OF_THE_N_GLYCAN_PRECURSOR_DOLICHOL_LIPID_LINKED_OLIGOSACCHARIDE_LLO_AND_TRANSFER_TO_A_NASCENT_PROTEIN	PID_ERBB1_DOWNSTREAM_PATHWAY	0.769643	0	621	18	0	18
REACTOME_BMAL1_CLOCK_NPAS2_ACTIVATES_CIRCADIAN_EXPRESSION	PID_ECADHERIN_NASCENTAJ_PATHWAY	0.898699	0	636	32	0	32
REACTOME_BMAL1_CLOCK_NPAS2_ACTIVATES_CIRCADIAN_EXPRESSION	PID_EPHBFWDPATHWAY	0.923231	0	636	48	5	43
REACTOME_BMAL1_CLOCK_NPAS2_ACTIVATES_CIRCADIAN_EXPRESSION	PID_FAK_PATHWAY	0.729442	0	636	69	5	64
REACTOME_BMAL1_CLOCK_NPAS2_ACTIVATES_CIRCADIAN_EXPRESSION	PID_PDGFRBPATHWAY	0.63314	0	636	115	11	104
REACTOME_CASPASE_MEDIATED_CLEAVAGE_OF_CYTOSKELETAL_PROTEINS	PID_CDC42_PATHWAY	0.625576	0	1148	2	0	2
REACTOME_CASPASE_MEDIATED_CLEAVAGE_OF_CYTOSKELETAL_PROTEINS	PID_ECADHERIN_NASCENTAJ_PATHWAY	0.71464	0	1148	4	0	4
REACTOME_CASPASE_MEDIATED_CLEAVAGE_OF_CYTOSKELETAL_PROTEINS	PID_GLYPICAN_1PATHWAY	0.861439	0	1148	1	0	1
REACTOME_CASPASE_MEDIATED_CLEAVAGE_OF_CYTOSKELETAL_PROTEINS	PID_PI3KCIPATHWAY	0.7377	0	1148	3	0	3
REACTOME_CA_DEPENDENT_EVENTS	KEGG_UBIQUITIN_MEDIATED_PROTEOLYSIS	0.642259	0	767	66	17	49
REACTOME_CA_DEPENDENT_EVENTS	PID_CMYB_PATHWAY	0.754802	0	767	35	5	30
REACTOME_CD28_CO_STIMULATION	KEGG_WNT_SIGNALING_PATHWAY	0.761137	0	579	65	8	57
REACTOME_CD28_DEPENDENT_PI3K_AKT_SIGNALING	PID_RB_1PATHWAY	0.678516	0	677	12	3	9
REACTOME_CD28_DEPENDENT_PI3K_AKT_SIGNALING	REACTOME_NGF_SIGNALLING_VIA_TRKA_FROM_THE_PLASMA_MEMBRANE	0.601599	0	677	33	8	25
REACTOME_CDK_MEDIATED_PHOSPHORYLATION_AND_REMOVAL_OF_CDC6	PID_NFAT_3PATHWAY	0.679173	0	1147	5	2	3
REACTOME_CELL_CELL_COMMUNICATION	KEGG_AXON_GUIDANCE	0.760069	0	577	94	5	89
REACTOME_CELL_CELL_COMMUNICATION	REACTOME_NGF_SIGNALLING_VIA_TRKA_FROM_THE_PLASMA_MEMBRANE	0.649884	0	577	85	8	77
REACTOME_CELL_CELL_COMMUNICATION	REACTOME_OPIOID_SIGNALLING	0.775018	0	577	44	3	41
REACTOME_CELL_CELL_COMMUNICATION	REACTOME_SIGNALLING_BY_NGF	0.62107	0	577	149	10	139
REACTOME_CELL_CYCLE	PID_MET_PATHWAY	0.650752	0	688	310	37	273
REACTOME_CELL_CYCLE	REACTOME_SIGNALING_BY_RHO_GTPASES	0.631353	0	688	173	22	151
REACTOME_CELL_CYCLE_CHECKPOINTS	KEGG_GLIOMA	0.667758	0	1047	20	2	18
REACTOME_CELL_CYCLE_CHECKPOINTS	KEGG_T_CELL_RECEPTOR_SIGNALING_PATHWAY	0.653658	0	1047	25	4	21
REACTOME_CELL_CYCLE_CHECKPOINTS	PID_PI3KPLCTRKPATHWAY	0.748685	0	1047	16	3	13
REACTOME_CELL_CYCLE_CHECKPOINTS	REACTOME_SIGNALING_BY_RHO_GTPASES	0.600569	0	1047	19	5	14
REACTOME_CELL_CYCLE_CHECKPOINTS	SIG_PIP3_SIGNALING_IN_CARDIAC_MYOCTES	0.651632	0	1047	11	3	8
REACTOME_CELL_CYCLE_CHECKPOINTS	ST_PHOSPHOINOSITIDE_3_KINASE_PATHWAY	0.719519	0	1047	8	3	5
REACTOME_CELL_CYCLE_MITOTIC	PID_FGF_PATHWAY	0.874615	0	675	117	22	95
REACTOME_CELL_CYCLE_MITOTIC	REACTOME_NGF_SIGNALLING_VIA_TRKA_FROM_THE_PLASMA_MEMBRANE	0.617229	0	675	208	27	181
REACTOME_CELL_DEATH_SIGNALLING_VIA_NRAGE_NRIF_AND_NADE	KEGG_AXON_GUIDANCE	0.705134	0	707	81	9	72
REACTOME_CELL_DEATH_SIGNALLING_VIA_NRAGE_NRIF_AND_NADE	KEGG_REGULATION_OF_ACTIN_CYTOSKELETON	0.691795	0	707	132	16	116
REACTOME_CELL_DEATH_SIGNALLING_VIA_NRAGE_NRIF_AND_NADE	KEGG_UBIQUITIN_MEDIATED_PROTEOLYSIS	0.607815	0	707	101	17	84
REACTOME_CELL_DEATH_SIGNALLING_VIA_NRAGE_NRIF_AND_NADE	PID_PDGFRBPATHWAY	0.60413	0	707	112	9	103
REACTOME_CELL_DEATH_SIGNALLING_VIA_NRAGE_NRIF_AND_NADE	REACTOME_SIGNALING_BY_TGF_BETA_RECEPTOR_COMPLEX	0.707247	0	707	60	9	51
REACTOME_CELL_JUNCTION_ORGANIZATION	BIOCARTA_AT1R_PATHWAY	0.91744	0	570	18	0	18
REACTOME_CELL_JUNCTION_ORGANIZATION	KEGG_PATHWAYS_IN_CANCER	0.682818	0	570	95	2	93
REACTOME_CELL_JUNCTION_ORGANIZATION	PID_RB_1PATHWAY	0.914805	0	570	19	0	19
REACTOME_CELL_JUNCTION_ORGANIZATION	REACTOME_CYTOKINE_SIGNALING_IN_IMMUNE_SYSTEM	0.674445	0	570	65	0	65
REACTOME_CGMP_EFFECTS	REACTOME_SIGNALING_BY_RHO_GTPASES	0.618458	0	380	4	0	4
REACTOME_CHOLESTEROL_BIOSYNTHESIS	KEGG_OOCYTE_MEIOSIS	0.600209	0	1346	2	2	0
REACTOME_CHOLESTEROL_BIOSYNTHESIS	REACTOME_SIGNALING_BY_TGF_BETA_RECEPTOR_COMPLEX	0.60647	0	1346	3	0	3
REACTOME_CHONDROITIN_SULFATE_BIOSYNTHESIS	KEGG_MELANOGENESIS	0.84	0	605	6	0	6
REACTOME_CHONDROITIN_SULFATE_BIOSYNTHESIS	REACTOME_SIGNALING_BY_ERBB2	0.65972	0	605	6	0	6
REACTOME_CHONDROITIN_SULFATE_DERMATAN_SULFATE_METABOLISM	PID_MTOR_4PATHWAY	0.694551	0	661	23	0	23
REACTOME_CHROMOSOME_MAINTENANCE	BIOCARTA_MET_PATHWAY	0.736914	0	794	23	6	17
REACTOME_CHROMOSOME_MAINTENANCE	KEGG_RENAL_CELL_CARCINOMA	0.644951	0	794	29	7	22
REACTOME_CHROMOSOME_MAINTENANCE	KEGG_T_CELL_RECEPTOR_SIGNALING_PATHWAY	0.639155	0	794	35	4	31
REACTOME_CHROMOSOME_MAINTENANCE	PID_FGF_PATHWAY	0.872478	0	794	27	7	20
REACTOME_CHROMOSOME_MAINTENANCE	PID_RET_PATHWAY	0.783255	0	794	28	8	20
REACTOME_CHROMOSOME_MAINTENANCE	REACTOME_SIGNALING_BY_FGFR_IN_DISEASE	0.60247	0	794	54	8	46
REACTOME_CIRCADIAN_CLOCK	KEGG_AXON_GUIDANCE	0.64724	0	630	97	20	77
REACTOME_CIRCADIAN_CLOCK	KEGG_WNT_SIGNALING_PATHWAY	0.716617	0	630	139	19	120
REACTOME_CIRCADIAN_CLOCK	PID_ECADHERIN_NASCENTAJ_PATHWAY	0.794553	0	630	42	1	41
REACTOME_CIRCADIAN_CLOCK	PID_FAK_PATHWAY	0.715553	0	630	85	10	75
REACTOME_CIRCADIAN_CLOCK	PID_PDGFRBPATHWAY	0.645533	0	630	153	21	132
REACTOME_CIRCADIAN_REPRESSION_OF_EXPRESSION_BY_REV_ERBA	KEGG_NEUROTROPHIN_SIGNALING_PATHWAY	0.665973	0	572	69	13	56
REACTOME_CIRCADIAN_REPRESSION_OF_EXPRESSION_BY_REV_ERBA	PID_PDGFRBPATHWAY	0.695277	0	572	100	11	89
REACTOME_CIRCADIAN_REPRESSION_OF_EXPRESSION_BY_REV_ERBA	REACTOME_NGF_SIGNALLING_VIA_TRKA_FROM_THE_PLASMA_MEMBRANE	0.601961	0	572	74	11	63
REACTOME_CLASS_I_MHC_MEDIATED_ANTIGEN_PROCESSING_PRESENTATION	PID_NFAT_3PATHWAY	0.78311	0	672	131	10	121
REACTOME_CLASS_I_MHC_MEDIATED_ANTIGEN_PROCESSING_PRESENTATION	REACTOME_SIGNALLING_BY_NGF	0.601815	0	672	394	40	354
REACTOME_CLEAVAGE_OF_GROWING_TRANSCRIPT_IN_THE_TERMINATION_REGION_	KEGG_OOCYTE_MEIOSIS	0.703488	0	687	37	2	35
REACTOME_COLLAGEN_FORMATION	BIOCARTA_ALK_PATHWAY	0.675801	0	1407	1	0	1
REACTOME_COLLAGEN_FORMATION	KEGG_COLORECTAL_CANCER	0.657878	0	1407	2	0	2
REACTOME_CONVERSION_FROM_APC_C_CDC20_TO_APC_C_CDH1_IN_LATE_ANAPHASE	KEGG_OOCYTE_MEIOSIS	0.604616	0	1205	10	2	8
REACTOME_CONVERSION_FROM_APC_C_CDC20_TO_APC_C_CDH1_IN_LATE_ANAPHASE	PID_NFAT_3PATHWAY	0.65233	0	1205	7	2	5
REACTOME_CREB_PHOSPHORYLATION_THROUGH_THE_ACTIVATION_OF_RAS	PID_TRKRPATHWAY	0.633779	0	1005	35	9	26
REACTOME_CREB_PHOSPHORYLATION_THROUGH_THE_ACTIVATION_OF_RAS	REACTOME_PLATELET_ACTIVATION_SIGNALING_AND_AGGREGATION	0.620606	0	1005	32	3	29
REACTOME_CREB_PHOSPHORYLATION_THROUGH_THE_ACTIVATION_OF_RAS	REACTOME_TRANS_GOLGI_NETWORK_VESICLE_BUDDING	0.717811	0	1005	28	6	22
REACTOME_CRMPS_IN_SEMA3A_SIGNALING	REACTOME_REGULATION_OF_KIT_SIGNALING	0.904474	0	1395	5	1	4
REACTOME_CRMPS_IN_SEMA3A_SIGNALING	REACTOME_SIGNALING_BY_SCF_KIT	0.648904	0	1395	9	3	6
REACTOME_CYCLIN_A_B1_ASSOCIATED_EVENTS_DURING_G2_M_TRANSITION	REACTOME_OPIOID_SIGNALLING	0.657594	0	999	4	1	3
REACTOME_CYTOSOLIC_TRNA_AMINOACYLATION	KEGG_T_CELL_RECEPTOR_SIGNALING_PATHWAY	0.720586	0	881	12	0	12
REACTOME_CYTOSOLIC_TRNA_AMINOACYLATION	KEGG_WNT_SIGNALING_PATHWAY	0.609743	0	881	19	1	18
REACTOME_CYTOSOLIC_TRNA_AMINOACYLATION	PID_AP1_PATHWAY	0.822199	0	881	10	0	10
REACTOME_CYTOSOLIC_TRNA_AMINOACYLATION	REACTOME_SIGNALING_BY_RHO_GTPASES	0.613797	0	881	10	0	10
REACTOME_DAG_AND_IP3_SIGNALING	KEGG_UBIQUITIN_MEDIATED_PROTEOLYSIS	0.684842	0	643	58	8	50
REACTOME_DCC_MEDIATED_ATTRACTIVE_SIGNALING	KEGG_UBIQUITIN_MEDIATED_PROTEOLYSIS	0.628371	0	657	38	5	33
REACTOME_DEADENYLATION_DEPENDENT_MRNA_DECAY	KEGG_LONG_TERM_DEPRESSION	0.81324	0	769	46	4	42
REACTOME_DEADENYLATION_OF_MRNA	KEGG_FOCAL_ADHESION	0.641708	0	799	33	1	32
REACTOME_DEADENYLATION_OF_MRNA	KEGG_OOCYTE_MEIOSIS	0.656627	0	799	26	2	24
REACTOME_DEADENYLATION_OF_MRNA	REACTOME_OPIOID_SIGNALLING	0.675938	0	799	11	3	8
REACTOME_DEPOSITION_OF_NEW_CENPA_CONTAINING_NUCLEOSOMES_AT_THE_CENTROMERE	KEGG_GLIOMA	0.751146	0	872	11	1	10
REACTOME_DEPOSITION_OF_NEW_CENPA_CONTAINING_NUCLEOSOMES_AT_THE_CENTROMERE	PID_MTOR_4PATHWAY	0.634758	0	872	15	2	13
REACTOME_DEPOSITION_OF_NEW_CENPA_CONTAINING_NUCLEOSOMES_AT_THE_CENTROMERE	REACTOME_SIGNALING_BY_RHO_GTPASES	0.647719	0	872	14	2	12
REACTOME_DESTABILIZATION_OF_MRNA_BY_AUF1_HNRNP_D0	BIOCARTA_AT1R_PATHWAY	0.739053	0	1572	4	1	3
REACTOME_DESTABILIZATION_OF_MRNA_BY_AUF1_HNRNP_D0	BIOCARTA_TCR_PATHWAY	0.688823	0	1572	3	1	2
REACTOME_DESTABILIZATION_OF_MRNA_BY_AUF1_HNRNP_D0	PID_ERBB1_INTERNALIZATION_PATHWAY	0.632228	0	1572	2	1	1
REACTOME_DESTABILIZATION_OF_MRNA_BY_AUF1_HNRNP_D0	REACTOME_CIRCADIAN_CLOCK	0.659916	0	1572	3	1	2
REACTOME_DESTABILIZATION_OF_MRNA_BY_KSRP	KEGG_UBIQUITIN_MEDIATED_PROTEOLYSIS	0.600329	0	604	23	6	17
REACTOME_DESTABILIZATION_OF_MRNA_BY_KSRP	PID_HIF1_TFPATHWAY	0.739699	0	604	6	0	6
REACTOME_DESTABILIZATION_OF_MRNA_BY_KSRP	PID_MTOR_4PATHWAY	0.790071	0	604	8	2	6
REACTOME_DESTABILIZATION_OF_MRNA_BY_TRISTETRAPROLIN_TTP	KEGG_UBIQUITIN_MEDIATED_PROTEOLYSIS	0.628742	0	663	77	28	49
REACTOME_DEVELOPMENTAL_BIOLOGY	KEGG_UBIQUITIN_MEDIATED_PROTEOLYSIS	0.728802	0	528	568	61	507
REACTOME_DNA_REPAIR	KEGG_ENDOCYTOSIS	0.632651	0	737	60	7	53
REACTOME_DNA_REPAIR	PID_PDGFRBPATHWAY	0.612034	0	737	65	4	61
REACTOME_DNA_REPLICATION	KEGG_PATHWAYS_IN_CANCER	0.60342	0	610	255	33	222
REACTOME_DNA_REPLICATION	PID_LKB1_PATHWAY	0.866303	0	610	71	9	62
REACTOME_DNA_REPLICATION	PID_MTOR_4PATHWAY	0.817266	0	610	117	15	102
REACTOME_DOUBLE_STRAND_BREAK_REPAIR	PID_PDGFRBPATHWAY	0.611871	0	687	24	2	22
REACTOME_DOWNREGULATION_OF_ERBB2_ERBB3_SIGNALING	REACTOME_DOWNSTREAM_SIGNAL_TRANSDUCTION	0.625834	0	1060	13	2	11
REACTOME_DOWNREGULATION_OF_ERBB2_ERBB3_SIGNALING	REACTOME_SIGNALING_BY_FGFR_IN_DISEASE	0.646805	0	1060	22	2	20
REACTOME_DOWNREGULATION_OF_SMAD2_3_SMAD4_TRANSCRIPTIONAL_ACTIVITY	KEGG_ENDOCYTOSIS	0.784605	0	619	97	9	88
REACTOME_DOWNREGULATION_OF_SMAD2_3_SMAD4_TRANSCRIPTIONAL_ACTIVITY	PID_TGFBRPATHWAY	0.817009	0	619	48	9	39
REACTOME_DOWNSTREAM_SIGNALING_EVENTS_OF_B_CELL_RECEPTOR_BCR	KEGG_UBIQUITIN_MEDIATED_PROTEOLYSIS	0.663351	0	688	132	31	101
REACTOME_DOWNSTREAM_SIGNALING_OF_ACTIVATED_FGFR	KEGG_UBIQUITIN_MEDIATED_PROTEOLYSIS	0.6898	0	570	187	40	147
REACTOME_DOWNSTREAM_SIGNALING_OF_ACTIVATED_FGFR	REACTOME_SIGNALING_BY_TGF_BETA_RECEPTOR_COMPLEX	0.868998	0	570	114	15	99
REACTOME_DOWNSTREAM_SIGNAL_TRANSDUCTION	KEGG_UBIQUITIN_MEDIATED_PROTEOLYSIS	0.649589	0	568	214	42	172
REACTOME_DOWNSTREAM_TCR_SIGNALING	KEGG_WNT_SIGNALING_PATHWAY	0.855466	0	629	54	1	53
REACTOME_DOWNSTREAM_TCR_SIGNALING	PID_PDGFRBPATHWAY	0.629223	0	629	61	2	59
REACTOME_DOWNSTREAM_TCR_SIGNALING	PID_RET_PATHWAY	0.76295	0	629	21	1	20
REACTOME_DOWNSTREAM_TCR_SIGNALING	REACTOME_NGF_SIGNALLING_VIA_TRKA_FROM_THE_PLASMA_MEMBRANE	0.638366	0	629	43	2	41
REACTOME_DOWNSTREAM_TCR_SIGNALING	REACTOME_SIGNALLING_BY_NGF	0.61191	0	629	67	2	65
REACTOME_DSCAM_INTERACTIONS	PID_KITPATHWAY	0.664232	0	1284	0	0	0
REACTOME_DSCAM_INTERACTIONS	PID_PI3KCIAKTPATHWAY	0.647442	0	1284	0	0	0
REACTOME_E2F_ENABLED_INHIBITION_OF_PRE_REPLICATION_COMPLEX_FORMATION	PID_ERBB1_INTERNALIZATION_PATHWAY	0.621034	0	740	0	0	0
REACTOME_E2F_MEDIATED_REGULATION_OF_DNA_REPLICATION	KEGG_MELANOGENESIS	0.717401	0	1017	8	0	8
REACTOME_E2F_MEDIATED_REGULATION_OF_DNA_REPLICATION	REACTOME_TRANSMISSION_ACROSS_CHEMICAL_SYNAPSES	0.639485	0	1017	6	0	6
REACTOME_EARLY_PHASE_OF_HIV_LIFE_CYCLE	PID_CMYB_PATHWAY	0.795109	0	586	1	0	1
REACTOME_ELEVATION_OF_CYTOSOLIC_CA2_LEVELS	PID_MET_PATHWAY	0.766675	0	361	4	0	4
REACTOME_ELONGATION_ARREST_AND_RECOVERY	KEGG_OOCYTE_MEIOSIS	0.670573	0	841	22	1	21
REACTOME_ELONGATION_ARREST_AND_RECOVERY	REACTOME_DOWNSTREAM_SIGNALING_OF_ACTIVATED_FGFR	0.752653	0	841	23	0	23
REACTOME_ELONGATION_ARREST_AND_RECOVERY	REACTOME_DOWNSTREAM_SIGNAL_TRANSDUCTION	0.73578	0	841	30	0	30
REACTOME_ELONGATION_ARREST_AND_RECOVERY	REACTOME_NGF_SIGNALLING_VIA_TRKA_FROM_THE_PLASMA_MEMBRANE	0.639421	0	841	27	0	27
REACTOME_ELONGATION_ARREST_AND_RECOVERY	REACTOME_OPIOID_SIGNALLING	0.880669	0	841	12	0	12
REACTOME_ELONGATION_ARREST_AND_RECOVERY	REACTOME_SIGNALING_BY_EGFR_IN_CANCER	0.681776	0	841	31	1	30
REACTOME_ELONGATION_ARREST_AND_RECOVERY	REACTOME_SIGNALING_BY_ERBB2	0.698192	0	841	29	0	29
REACTOME_ELONGATION_ARREST_AND_RECOVERY	REACTOME_SIGNALING_BY_PDGF	0.713671	0	841	30	0	30
REACTOME_ELONGATION_ARREST_AND_RECOVERY	REACTOME_SIGNALLING_BY_NGF	0.637848	0	841	44	0	44
REACTOME_ENDOSOMAL_SORTING_COMPLEX_REQUIRED_FOR_TRANSPORT_ESCRT	KEGG_AXON_GUIDANCE	0.721097	0	533	36	1	35
REACTOME_ENDOSOMAL_SORTING_COMPLEX_REQUIRED_FOR_TRANSPORT_ESCRT	KEGG_WNT_SIGNALING_PATHWAY	0.789278	0	533	42	4	38
REACTOME_ENDOSOMAL_SORTING_COMPLEX_REQUIRED_FOR_TRANSPORT_ESCRT	PID_MTOR_4PATHWAY	0.838929	0	533	30	2	28
REACTOME_ENDOSOMAL_SORTING_COMPLEX_REQUIRED_FOR_TRANSPORT_ESCRT	PID_PDGFRBPATHWAY	0.683712	0	533	47	0	47
REACTOME_ENERGY_DEPENDENT_REGULATION_OF_MTOR_BY_LKB1_AMPK	KEGG_TGF_BETA_SIGNALING_PATHWAY	0.828943	0	1093	27	0	27
REACTOME_ENERGY_DEPENDENT_REGULATION_OF_MTOR_BY_LKB1_AMPK	PID_MTOR_4PATHWAY	0.672267	0	1093	27	1	26
REACTOME_ENERGY_DEPENDENT_REGULATION_OF_MTOR_BY_LKB1_AMPK	PID_NFAT_3PATHWAY	0.701235	0	1093	14	1	13
REACTOME_ENOS_ACTIVATION_AND_REGULATION	SIG_CHEMOTAXIS	0.73516	0	939	7	1	6
REACTOME_ENOS_ACTIVATION_AND_REGULATION	SIG_INSULIN_RECEPTOR_PATHWAY_IN_CARDIAC_MYOCYTES	0.700448	0	939	13	2	11
REACTOME_ER_PHAGOSOME_PATHWAY	BIOCARTA_AT1R_PATHWAY	0.849196	0	1109	8	1	7
REACTOME_ER_PHAGOSOME_PATHWAY	KEGG_OOCYTE_MEIOSIS	0.603342	0	1109	10	2	8
REACTOME_ER_PHAGOSOME_PATHWAY	PID_LKB1_PATHWAY	0.735346	0	1109	11	0	11
REACTOME_ER_PHAGOSOME_PATHWAY	PID_NFAT_3PATHWAY	0.77277	0	1109	8	2	6
REACTOME_ER_PHAGOSOME_PATHWAY	PID_RHOA_PATHWAY	0.663755	0	1109	11	0	11
REACTOME_FANCONI_ANEMIA_PATHWAY	KEGG_AXON_GUIDANCE	0.656284	0	535	14	2	12
REACTOME_FANCONI_ANEMIA_PATHWAY	KEGG_ENDOCYTOSIS	0.687304	0	535	18	2	16
REACTOME_FANCONI_ANEMIA_PATHWAY	KEGG_FOCAL_ADHESION	0.697911	0	535	17	1	16
REACTOME_FANCONI_ANEMIA_PATHWAY	KEGG_RENAL_CELL_CARCINOMA	0.788515	0	535	7	1	6
REACTOME_FANCONI_ANEMIA_PATHWAY	PID_INSULIN_PATHWAY	0.823115	0	535	3	1	2
REACTOME_FANCONI_ANEMIA_PATHWAY	PID_MET_PATHWAY	0.781286	0	535	17	1	16
REACTOME_FANCONI_ANEMIA_PATHWAY	PID_PDGFRBPATHWAY	0.67517	0	535	17	2	15
REACTOME_FANCONI_ANEMIA_PATHWAY	PID_VEGFR1_2_PATHWAY	0.877197	0	535	9	1	8
REACTOME_FANCONI_ANEMIA_PATHWAY	REACTOME_HEMOSTASIS	0.609656	0	535	30	5	25
REACTOME_FANCONI_ANEMIA_PATHWAY	REACTOME_PLATELET_ACTIVATION_SIGNALING_AND_AGGREGATION	0.652916	0	535	6	0	6
REACTOME_FANCONI_ANEMIA_PATHWAY	REACTOME_SIGNALING_BY_EGFR_IN_CANCER	0.660694	0	535	14	1	13
REACTOME_FANCONI_ANEMIA_PATHWAY	REACTOME_SIGNALING_BY_ERBB2	0.679812	0	535	15	2	13
REACTOME_FATTY_ACID_TRIACYLGLYCEROL_AND_KETONE_BODY_METABOLISM	KEGG_AXON_GUIDANCE	0.618063	0	687	178	17	161
REACTOME_FATTY_ACID_TRIACYLGLYCEROL_AND_KETONE_BODY_METABOLISM	KEGG_CHEMOKINE_SIGNALING_PATHWAY	0.78165	0	687	180	12	168
REACTOME_FATTY_ACID_TRIACYLGLYCEROL_AND_KETONE_BODY_METABOLISM	KEGG_INSULIN_SIGNALING_PATHWAY	0.64593	0	687	199	16	183
REACTOME_FATTY_ACID_TRIACYLGLYCEROL_AND_KETONE_BODY_METABOLISM	KEGG_NEUROTROPHIN_SIGNALING_PATHWAY	0.601176	0	687	178	18	160
REACTOME_FATTY_ACID_TRIACYLGLYCEROL_AND_KETONE_BODY_METABOLISM	KEGG_REGULATION_OF_ACTIN_CYTOSKELETON	0.685626	0	687	265	25	240
REACTOME_FATTY_ACID_TRIACYLGLYCEROL_AND_KETONE_BODY_METABOLISM	KEGG_RENAL_CELL_CARCINOMA	0.671377	0	687	128	16	112
REACTOME_FATTY_ACID_TRIACYLGLYCEROL_AND_KETONE_BODY_METABOLISM	KEGG_UBIQUITIN_MEDIATED_PROTEOLYSIS	0.726135	0	687	261	30	231
REACTOME_FATTY_ACID_TRIACYLGLYCEROL_AND_KETONE_BODY_METABOLISM	KEGG_WNT_SIGNALING_PATHWAY	0.802678	0	687	226	17	209
REACTOME_FATTY_ACID_TRIACYLGLYCEROL_AND_KETONE_BODY_METABOLISM	PID_FAK_PATHWAY	0.747005	0	687	151	8	143
REACTOME_FATTY_ACID_TRIACYLGLYCEROL_AND_KETONE_BODY_METABOLISM	PID_PDGFRBPATHWAY	0.656499	0	687	229	21	208
REACTOME_FATTY_ACID_TRIACYLGLYCEROL_AND_KETONE_BODY_METABOLISM	PID_TRKRPATHWAY	0.664486	0	687	133	13	120
REACTOME_FORMATION_OF_ATP_BY_CHEMIOSMOTIC_COUPLING	PID_MYC_ACTIVPATHWAY	0.653134	0	752	1	2	-1
REACTOME_FORMATION_OF_ATP_BY_CHEMIOSMOTIC_COUPLING	REACTOME_MRNA_PROCESSING	0.609859	0	752	0	0	0
REACTOME_FORMATION_OF_ATP_BY_CHEMIOSMOTIC_COUPLING	REACTOME_MRNA_SPLICING	0.663657	0	752	0	0	0
REACTOME_FORMATION_OF_ATP_BY_CHEMIOSMOTIC_COUPLING	REACTOME_PROCESSING_OF_CAPPED_INTRON_CONTAINING_PRE_MRNA	0.625708	0	752	0	0	0
REACTOME_FORMATION_OF_RNA_POL_II_ELONGATION_COMPLEX_	KEGG_OOCYTE_MEIOSIS	0.644121	0	827	23	1	22
REACTOME_FORMATION_OF_RNA_POL_II_ELONGATION_COMPLEX_	REACTOME_SIGNALING_BY_EGFR_IN_CANCER	0.650076	0	827	31	1	30
REACTOME_FORMATION_OF_THE_HIV1_EARLY_ELONGATION_COMPLEX	KEGG_ENDOCYTOSIS	0.644061	0	904	10	0	10
REACTOME_FORMATION_OF_THE_TERNARY_COMPLEX_AND_SUBSEQUENTLY_THE_43S_COMPLEX	KEGG_AXON_GUIDANCE	0.642939	0	1002	7	1	6
REACTOME_FORMATION_OF_THE_TERNARY_COMPLEX_AND_SUBSEQUENTLY_THE_43S_COMPLEX	PID_CXCR4_PATHWAY	0.721539	0	1002	5	1	4
REACTOME_FORMATION_OF_THE_TERNARY_COMPLEX_AND_SUBSEQUENTLY_THE_43S_COMPLEX	PID_MET_PATHWAY	0.634434	0	1002	5	0	5
REACTOME_FORMATION_OF_THE_TERNARY_COMPLEX_AND_SUBSEQUENTLY_THE_43S_COMPLEX	PID_PDGFRBPATHWAY	0.631693	0	1002	8	0	8
REACTOME_FORMATION_OF_THE_TERNARY_COMPLEX_AND_SUBSEQUENTLY_THE_43S_COMPLEX	PID_RHOA_PATHWAY	0.692524	0	1002	1	0	1
REACTOME_FORMATION_OF_THE_TERNARY_COMPLEX_AND_SUBSEQUENTLY_THE_43S_COMPLEX	PID_THROMBIN_PAR1_PATHWAY	0.879694	0	1002	2	1	1
REACTOME_FORMATION_OF_TRANSCRIPTION_COUPLED_NER_TC_NER_REPAIR_COMPLEX	KEGG_WNT_SIGNALING_PATHWAY	0.688624	0	744	4	0	4
REACTOME_FORMATION_OF_TUBULIN_FOLDING_INTERMEDIATES_BY_CCT_TRIC	KEGG_GLIOMA	0.629404	0	877	2	0	2
REACTOME_FORMATION_OF_TUBULIN_FOLDING_INTERMEDIATES_BY_CCT_TRIC	PID_BETACATENIN_NUC_PATHWAY	0.677844	0	877	5	1	4
REACTOME_FORMATION_OF_TUBULIN_FOLDING_INTERMEDIATES_BY_CCT_TRIC	PID_ERBB1_DOWNSTREAM_PATHWAY	0.667911	0	877	5	0	5
REACTOME_FORMATION_OF_TUBULIN_FOLDING_INTERMEDIATES_BY_CCT_TRIC	PID_FAK_PATHWAY	0.626467	0	877	2	1	1
REACTOME_FORMATION_OF_TUBULIN_FOLDING_INTERMEDIATES_BY_CCT_TRIC	PID_MTOR_4PATHWAY	0.73091	0	877	5	0	5
REACTOME_FORMATION_OF_TUBULIN_FOLDING_INTERMEDIATES_BY_CCT_TRIC	PID_P53REGULATIONPATHWAY	0.797629	0	877	7	1	6
REACTOME_FORMATION_OF_TUBULIN_FOLDING_INTERMEDIATES_BY_CCT_TRIC	PID_PDGFRBPATHWAY	0.630839	0	877	7	1	6
REACTOME_FRS2_MEDIATED_CASCADE	KEGG_UBIQUITIN_MEDIATED_PROTEOLYSIS	0.742237	0	571	71	17	54
REACTOME_FRS2_MEDIATED_CASCADE	PID_ERBB1_INTERNALIZATION_PATHWAY	0.892919	0	571	21	5	16
REACTOME_G0_AND_EARLY_G1	KEGG_AXON_GUIDANCE	0.606049	0	676	33	3	30
REACTOME_G0_AND_EARLY_G1	KEGG_T_CELL_RECEPTOR_SIGNALING_PATHWAY	0.794643	0	676	29	3	26
REACTOME_G0_AND_EARLY_G1	PID_FAK_PATHWAY	0.641187	0	676	28	1	27
REACTOME_G0_AND_EARLY_G1	PID_MET_PATHWAY	0.700246	0	676	56	4	52
REACTOME_G0_AND_EARLY_G1	PID_PDGFRBPATHWAY	0.60407	0	676	51	2	49
REACTOME_G0_AND_EARLY_G1	PID_VEGFR1_2_PATHWAY	0.765074	0	676	30	1	29
REACTOME_G2_M_DNA_DAMAGE_CHECKPOINT	PID_ERBB1_DOWNSTREAM_PATHWAY	0.606779	0	882	14	2	12
REACTOME_GAB1_SIGNALOSOME	PID_CMYB_PATHWAY	0.79341	0	665	61	9	52
REACTOME_GABA_B_RECEPTOR_ACTIVATION	KEGG_UBIQUITIN_MEDIATED_PROTEOLYSIS	0.634884	0	940	18	1	17
REACTOME_GABA_B_RECEPTOR_ACTIVATION	PID_AR_PATHWAY	0.771146	0	940	10	0	10
REACTOME_GABA_RECEPTOR_ACTIVATION	BIOCARTA_ALK_PATHWAY	0.938914	0	940	7	0	7
REACTOME_GABA_RECEPTOR_ACTIVATION	BIOCARTA_MAPK_PATHWAY	0.626848	0	940	16	1	15
REACTOME_GABA_RECEPTOR_ACTIVATION	KEGG_UBIQUITIN_MEDIATED_PROTEOLYSIS	0.634884	0	940	18	1	17
REACTOME_GABA_RECEPTOR_ACTIVATION	PID_AR_PATHWAY	0.771146	0	940	10	0	10
REACTOME_GABA_RECEPTOR_ACTIVATION	PID_ERBB1_DOWNSTREAM_PATHWAY	0.652519	0	940	23	2	21
REACTOME_GAP_JUNCTION_TRAFFICKING	REACTOME_CIRCADIAN_CLOCK	0.793312	0	977	6	0	6
REACTOME_GENERIC_TRANSCRIPTION_PATHWAY	PID_PDGFRBPATHWAY	0.633882	0	593	312	21	291
REACTOME_GLUCAGON_SIGNALING_IN_METABOLIC_REGULATION	KEGG_UBIQUITIN_MEDIATED_PROTEOLYSIS	0.716693	0	521	26	1	25
REACTOME_GLUCAGON_TYPE_LIGAND_RECEPTORS	KEGG_MAPK_SIGNALING_PATHWAY	0.674976	0	569	18	0	18
REACTOME_GLUCONEOGENESIS	PID_PI3KCIAKTPATHWAY	0.724185	0	1366	3	0	3
REACTOME_GLUCONEOGENESIS	PID_PI3KPLCTRKPATHWAY	0.780767	0	1366	1	0	1
REACTOME_GLUCOSE_TRANSPORT	PID_PDGFRBPATHWAY	0.639197	0	667	72	12	60
REACTOME_GLUTAMATE_NEUROTRANSMITTER_RELEASE_CYCLE	REACTOME_GOLGI_ASSOCIATED_VESICLE_BIOGENESIS	0.846732	0	548	9	0	9
REACTOME_GLUTAMATE_NEUROTRANSMITTER_RELEASE_CYCLE	REACTOME_SIGNALLING_BY_NGF	0.644001	0	548	18	0	18
REACTOME_GLYCEROPHOSPHOLIPID_BIOSYNTHESIS	KEGG_UBIQUITIN_MEDIATED_PROTEOLYSIS	0.786658	0	667	92	7	85
REACTOME_GLYCEROPHOSPHOLIPID_BIOSYNTHESIS	KEGG_WNT_SIGNALING_PATHWAY	0.714267	0	667	73	6	67
REACTOME_GLYCEROPHOSPHOLIPID_BIOSYNTHESIS	PID_FAK_PATHWAY	0.631374	0	667	49	3	46
REACTOME_GLYCEROPHOSPHOLIPID_BIOSYNTHESIS	PID_PDGFRBPATHWAY	0.681688	0	667	79	8	71
REACTOME_GLYCEROPHOSPHOLIPID_BIOSYNTHESIS	REACTOME_SIGNALING_BY_RHO_GTPASES	0.670736	0	667	49	4	45
REACTOME_GLYCOGEN_BREAKDOWN_GLYCOGENOLYSIS	PID_PLK1_PATHWAY	0.697905	0	1972	3	1	2
REACTOME_GLYCOSAMINOGLYCAN_METABOLISM	KEGG_UBIQUITIN_MEDIATED_PROTEOLYSIS	0.633017	0	579	62	6	56
REACTOME_GLYCOSPHINGOLIPID_METABOLISM	PID_TGFBRPATHWAY	0.654138	0	1233	0	0	0
REACTOME_GOLGI_ASSOCIATED_VESICLE_BIOGENESIS	KEGG_UBIQUITIN_MEDIATED_PROTEOLYSIS	0.657294	0	752	166	36	130
REACTOME_GPCR_DOWNSTREAM_SIGNALING	KEGG_UBIQUITIN_MEDIATED_PROTEOLYSIS	0.784639	0	586	185	25	160
REACTOME_GROWTH_HORMONE_RECEPTOR_SIGNALING	KEGG_ENDOCYTOSIS	0.727989	0	554	41	4	37
REACTOME_GROWTH_HORMONE_RECEPTOR_SIGNALING	KEGG_REGULATION_OF_ACTIN_CYTOSKELETON	0.75962	0	554	45	4	41
REACTOME_G_ALPHA1213_SIGNALLING_EVENTS	KEGG_MAPK_SIGNALING_PATHWAY	0.805476	0	739	135	17	118
REACTOME_G_ALPHA1213_SIGNALLING_EVENTS	KEGG_UBIQUITIN_MEDIATED_PROTEOLYSIS	0.706595	0	739	105	19	86
REACTOME_G_ALPHA_I_SIGNALLING_EVENTS	BIOCARTA_ALK_PATHWAY	0.960017	0	739	12	2	10
REACTOME_G_ALPHA_I_SIGNALLING_EVENTS	REACTOME_MYOGENESIS	0.869078	0	739	8	1	7
REACTOME_G_ALPHA_S_SIGNALLING_EVENTS	KEGG_UBIQUITIN_MEDIATED_PROTEOLYSIS	0.719649	0	672	35	1	34
REACTOME_G_ALPHA_S_SIGNALLING_EVENTS	REACTOME_SIGNALLING_BY_NGF	0.606935	0	672	48	2	46
REACTOME_G_ALPHA_Z_SIGNALLING_EVENTS	KEGG_PATHWAYS_IN_CANCER	0.772215	0	568	65	2	63
REACTOME_G_ALPHA_Z_SIGNALLING_EVENTS	KEGG_UBIQUITIN_MEDIATED_PROTEOLYSIS	0.723913	0	568	39	1	38
REACTOME_G_ALPHA_Z_SIGNALLING_EVENTS	REACTOME_NGF_SIGNALLING_VIA_TRKA_FROM_THE_PLASMA_MEMBRANE	0.749034	0	568	39	2	37
REACTOME_G_ALPHA_Z_SIGNALLING_EVENTS	REACTOME_SIGNALLING_BY_NGF	0.708659	0	568	60	2	58
REACTOME_G_PROTEIN_ACTIVATION	KEGG_MAPK_SIGNALING_PATHWAY	0.657356	0	613	33	2	31
REACTOME_G_PROTEIN_ACTIVATION	KEGG_REGULATION_OF_ACTIN_CYTOSKELETON	0.66673	0	613	34	2	32
REACTOME_G_PROTEIN_ACTIVATION	KEGG_UBIQUITIN_MEDIATED_PROTEOLYSIS	0.678546	0	613	25	1	24
REACTOME_G_PROTEIN_ACTIVATION	REACTOME_SIGNALING_BY_BMP	0.992792	0	613	9	2	7
REACTOME_G_PROTEIN_BETA_GAMMA_SIGNALLING	KEGG_UBIQUITIN_MEDIATED_PROTEOLYSIS	0.812024	0	752	43	5	38
REACTOME_HEMOSTASIS	KEGG_UBIQUITIN_MEDIATED_PROTEOLYSIS	0.713636	0	545	459	52	407
REACTOME_HEPARAN_SULFATE_HEPARIN_HS_GAG_METABOLISM	KEGG_INSULIN_SIGNALING_PATHWAY	0.738966	0	577	34	0	34
REACTOME_HEPARAN_SULFATE_HEPARIN_HS_GAG_METABOLISM	KEGG_MAPK_SIGNALING_PATHWAY	0.619961	0	577	41	3	38
REACTOME_HEPARAN_SULFATE_HEPARIN_HS_GAG_METABOLISM	REACTOME_NGF_SIGNALLING_VIA_TRKA_FROM_THE_PLASMA_MEMBRANE	0.70668	0	577	31	3	28
REACTOME_HEPARAN_SULFATE_HEPARIN_HS_GAG_METABOLISM	SIG_CHEMOTAXIS	0.827349	0	577	8	0	8
REACTOME_HIV_INFECTION	KEGG_OOCYTE_MEIOSIS	0.666527	0	666	129	13	116
REACTOME_HIV_LIFE_CYCLE	KEGG_RENAL_CELL_CARCINOMA	0.729618	0	650	86	13	73
REACTOME_HIV_LIFE_CYCLE	PID_PDGFRBPATHWAY	0.603975	0	650	169	18	151
REACTOME_HOMOLOGOUS_RECOMBINATION_REPAIR_OF_REPLICATION_INDEPENDENT_DOUBLE_STRAND_BREAKS	KEGG_NEUROTROPHIN_SIGNALING_PATHWAY	0.670123	0	654	12	1	11
REACTOME_HOMOLOGOUS_RECOMBINATION_REPAIR_OF_REPLICATION_INDEPENDENT_DOUBLE_STRAND_BREAKS	PID_MET_PATHWAY	0.660326	0	654	16	1	15
REACTOME_HOMOLOGOUS_RECOMBINATION_REPAIR_OF_REPLICATION_INDEPENDENT_DOUBLE_STRAND_BREAKS	PID_PDGFRBPATHWAY	0.670836	0	654	22	2	20
REACTOME_HORMONE_SENSITIVE_LIPASE_HSL_MEDIATED_TRIACYLGLYCEROL_HYDROLYSIS	PID_LIS1PATHWAY	0.769677	0	1069	2	0	2
REACTOME_HOST_INTERACTIONS_OF_HIV_FACTORS	PID_LKB1_PATHWAY	0.801636	0	784	63	6	57
REACTOME_IL1_SIGNALING	KEGG_ENDOCYTOSIS	0.602994	0	658	50	2	48
REACTOME_IL_2_SIGNALING	KEGG_ENDOCYTOSIS	0.768373	0	611	81	9	72
REACTOME_IL_3_5_AND_GM_CSF_SIGNALING	KEGG_UBIQUITIN_MEDIATED_PROTEOLYSIS	0.749785	0	621	73	14	59
REACTOME_IL_3_5_AND_GM_CSF_SIGNALING	PID_SMAD2_3NUCLEARPATHWAY	0.699334	0	621	54	9	45
REACTOME_IL_6_SIGNALING	REACTOME_CIRCADIAN_CLOCK	0.821082	0	838	21	2	19
REACTOME_INCRETIN_SYNTHESIS_SECRETION_AND_INACTIVATION	KEGG_MELANOGENESIS	0.742115	0	1003	4	0	4
REACTOME_INCRETIN_SYNTHESIS_SECRETION_AND_INACTIVATION	PID_ERBB1_DOWNSTREAM_PATHWAY	0.621872	0	1003	6	0	6
REACTOME_INCRETIN_SYNTHESIS_SECRETION_AND_INACTIVATION	REACTOME_DOWNSTREAM_SIGNAL_TRANSDUCTION	0.638442	0	1003	2	0	2
REACTOME_INFLUENZA_LIFE_CYCLE	KEGG_OOCYTE_MEIOSIS	0.715029	0	617	88	11	77
REACTOME_INHIBITION_OF_INSULIN_SECRETION_BY_ADRENALINE_NORADRENALINE	BIOCARTA_ALK_PATHWAY	0.894984	0	1052	7	0	7
REACTOME_INHIBITION_OF_INSULIN_SECRETION_BY_ADRENALINE_NORADRENALINE	KEGG_UBIQUITIN_MEDIATED_PROTEOLYSIS	0.626682	0	1052	15	0	15
REACTOME_INHIBITION_OF_REPLICATION_INITIATION_OF_DAMAGED_DNA_BY_RB1_E2F1	KEGG_FC_GAMMA_R_MEDIATED_PHAGOCYTOSIS	0.629967	0	1085	9	0	9
REACTOME_INHIBITION_OF_THE_PROTEOLYTIC_ACTIVITY_OF_APC_C_REQUIRED_FOR_THE_ONSET_OF_ANAPHASE_BY_MITOTIC_SPINDLE_CHECKPOINT_COMPONENTS	KEGG_OOCYTE_MEIOSIS	0.604616	0	1205	10	2	8
REACTOME_INHIBITION_OF_THE_PROTEOLYTIC_ACTIVITY_OF_APC_C_REQUIRED_FOR_THE_ONSET_OF_ANAPHASE_BY_MITOTIC_SPINDLE_CHECKPOINT_COMPONENTS	PID_NFAT_3PATHWAY	0.65233	0	1205	7	2	5
REACTOME_INNATE_IMMUNE_SYSTEM	KEGG_ENDOCYTOSIS	0.680911	0	598	276	22	254
REACTOME_INNATE_IMMUNE_SYSTEM	PID_MTOR_4PATHWAY	0.813834	0	598	163	21	142
REACTOME_INSULIN_SYNTHESIS_AND_PROCESSING	KEGG_MAPK_SIGNALING_PATHWAY	0.60078	0	882	58	12	46
REACTOME_INSULIN_SYNTHESIS_AND_PROCESSING	KEGG_UBIQUITIN_MEDIATED_PROTEOLYSIS	0.645511	0	882	44	18	26
REACTOME_INSULIN_SYNTHESIS_AND_PROCESSING	KEGG_WNT_SIGNALING_PATHWAY	0.67185	0	882	34	7	27
REACTOME_INSULIN_SYNTHESIS_AND_PROCESSING	PID_CMYB_PATHWAY	0.754456	0	882	17	1	16
REACTOME_INSULIN_SYNTHESIS_AND_PROCESSING	PID_TGFBRPATHWAY	0.691354	0	882	32	10	22
REACTOME_INTEGRATION_OF_ENERGY_METABOLISM	KEGG_MAPK_SIGNALING_PATHWAY	0.626693	0	718	102	1	101
REACTOME_INTEGRATION_OF_ENERGY_METABOLISM	KEGG_UBIQUITIN_MEDIATED_PROTEOLYSIS	0.633598	0	718	80	3	77
REACTOME_INTEGRATION_OF_PROVIRUS	PID_CMYB_PATHWAY	0.795109	0	586	1	0	1
REACTOME_INTERFERON_ALPHA_BETA_SIGNALING	PID_SMAD2_3NUCLEARPATHWAY	0.694706	0	784	23	1	22
REACTOME_INTERFERON_ALPHA_BETA_SIGNALING	REACTOME_NGF_SIGNALLING_VIA_TRKA_FROM_THE_PLASMA_MEMBRANE	0.605959	0	784	24	2	22
REACTOME_INTRINSIC_PATHWAY_FOR_APOPTOSIS	KEGG_UBIQUITIN_MEDIATED_PROTEOLYSIS	0.761461	0	701	64	19	45
REACTOME_ION_CHANNEL_TRANSPORT	BIOCARTA_PYK2_PATHWAY	0.777392	0	901	15	2	13
REACTOME_ION_CHANNEL_TRANSPORT	KEGG_NEUROTROPHIN_SIGNALING_PATHWAY	0.63284	0	901	32	3	29
REACTOME_ION_CHANNEL_TRANSPORT	PID_P38_MKK3_6PATHWAY	0.902749	0	901	9	0	9
REACTOME_ION_CHANNEL_TRANSPORT	REACTOME_NGF_SIGNALLING_VIA_TRKA_FROM_THE_PLASMA_MEMBRANE	0.619741	0	901	41	3	38
REACTOME_ION_CHANNEL_TRANSPORT	REACTOME_SIGNALING_BY_EGFR_IN_CANCER	0.64657	0	901	49	4	45
REACTOME_ION_TRANSPORT_BY_P_TYPE_ATPASES	BIOCARTA_TCR_PATHWAY	0.76075	0	901	13	3	10
REACTOME_ION_TRANSPORT_BY_P_TYPE_ATPASES	KEGG_NEUROTROPHIN_SIGNALING_PATHWAY	0.63284	0	901	32	3	29
REACTOME_ION_TRANSPORT_BY_P_TYPE_ATPASES	KEGG_OOCYTE_MEIOSIS	0.620445	0	901	27	4	23
REACTOME_ION_TRANSPORT_BY_P_TYPE_ATPASES	PID_P38_MKK3_6PATHWAY	0.902749	0	901	9	0	9
REACTOME_ION_TRANSPORT_BY_P_TYPE_ATPASES	REACTOME_DOWNSTREAM_SIGNALING_OF_ACTIVATED_FGFR	0.661582	0	901	36	3	33
REACTOME_ION_TRANSPORT_BY_P_TYPE_ATPASES	REACTOME_NGF_SIGNALLING_VIA_TRKA_FROM_THE_PLASMA_MEMBRANE	0.619741	0	901	41	3	38
REACTOME_ION_TRANSPORT_BY_P_TYPE_ATPASES	REACTOME_SIGNALING_BY_EGFR_IN_CANCER	0.64657	0	901	49	4	45
REACTOME_ION_TRANSPORT_BY_P_TYPE_ATPASES	REACTOME_SIGNALING_BY_RHO_GTPASES	0.711299	0	901	36	3	33
REACTOME_IRAK1_RECRUITS_IKK_COMPLEX	REACTOME_NGF_SIGNALLING_VIA_TRKA_FROM_THE_PLASMA_MEMBRANE	0.698525	0	666	1	0	1
REACTOME_IRAK1_RECRUITS_IKK_COMPLEX	REACTOME_SIGNALING_BY_INSULIN_RECEPTOR	0.699493	0	666	1	0	1
REACTOME_IRAK2_MEDIATED_ACTIVATION_OF_TAK1_COMPLEX_UPON_TLR7_8_OR_9_STIMULATION	KEGG_FC_GAMMA_R_MEDIATED_PHAGOCYTOSIS	0.724802	0	538	20	0	20
REACTOME_IRAK2_MEDIATED_ACTIVATION_OF_TAK1_COMPLEX_UPON_TLR7_8_OR_9_STIMULATION	KEGG_REGULATION_OF_ACTIN_CYTOSKELETON	0.679964	0	538	40	1	39
REACTOME_IRAK2_MEDIATED_ACTIVATION_OF_TAK1_COMPLEX_UPON_TLR7_8_OR_9_STIMULATION	PID_MET_PATHWAY	0.723424	0	538	34	2	32
REACTOME_IRAK2_MEDIATED_ACTIVATION_OF_TAK1_COMPLEX_UPON_TLR7_8_OR_9_STIMULATION	PID_MTOR_4PATHWAY	0.756421	0	538	23	3	20
REACTOME_IRAK2_MEDIATED_ACTIVATION_OF_TAK1_COMPLEX_UPON_TLR7_8_OR_9_STIMULATION	PID_PDGFRBPATHWAY	0.623765	0	538	41	1	40
REACTOME_IRON_UPTAKE_AND_TRANSPORT	BIOCARTA_MAPK_PATHWAY	0.7081	0	787	17	2	15
REACTOME_IRON_UPTAKE_AND_TRANSPORT	KEGG_MAPK_SIGNALING_PATHWAY	0.602433	0	787	26	2	24
REACTOME_IRON_UPTAKE_AND_TRANSPORT	KEGG_T_CELL_RECEPTOR_SIGNALING_PATHWAY	0.76773	0	787	13	1	12
REACTOME_IRON_UPTAKE_AND_TRANSPORT	KEGG_UBIQUITIN_MEDIATED_PROTEOLYSIS	0.681655	0	787	24	2	22
REACTOME_IRON_UPTAKE_AND_TRANSPORT	PID_ERBB1_DOWNSTREAM_PATHWAY	0.697789	0	787	21	1	20
REACTOME_IRON_UPTAKE_AND_TRANSPORT	PID_P38_MKK3_6PATHWAY	0.896704	0	787	5	0	5
REACTOME_IRON_UPTAKE_AND_TRANSPORT	PID_RAC1_PATHWAY	0.881171	0	787	10	1	9
REACTOME_JNK_C_JUN_KINASES_PHOSPHORYLATION_AND_ACTIVATION_MEDIATED_BY_ACTIVATED_HUMAN_TAK1	KEGG_NEUROTROPHIN_SIGNALING_PATHWAY	0.601575	0	548	33	0	33
REACTOME_JNK_C_JUN_KINASES_PHOSPHORYLATION_AND_ACTIVATION_MEDIATED_BY_ACTIVATED_HUMAN_TAK1	PID_PDGFRBPATHWAY	0.625779	0	548	56	1	55
REACTOME_KERATAN_SULFATE_BIOSYNTHESIS	REACTOME_SIGNALING_BY_RHO_GTPASES	0.66528	0	828	4	1	3
REACTOME_KERATAN_SULFATE_KERATIN_METABOLISM	REACTOME_CIRCADIAN_CLOCK	0.732283	0	1180	9	0	9
REACTOME_L1CAM_INTERACTIONS	PID_MYC_ACTIVPATHWAY	0.679243	0	942	43	2	41
REACTOME_LATENT_INFECTION_OF_HOMO_SAPIENS_WITH_MYCOBACTERIUM_TUBERCULOSIS	PID_VEGFR1_2_PATHWAY	0.646621	0	960	10	2	8
REACTOME_LATE_PHASE_OF_HIV_LIFE_CYCLE	KEGG_NEUROTROPHIN_SIGNALING_PATHWAY	0.611815	0	657	106	11	95
REACTOME_LATE_PHASE_OF_HIV_LIFE_CYCLE	PID_MTOR_4PATHWAY	0.695435	0	657	95	8	87
REACTOME_LIPID_DIGESTION_MOBILIZATION_AND_TRANSPORT	BIOCARTA_ECM_PATHWAY	0.771032	0	1373	12	0	12
REACTOME_LIPID_DIGESTION_MOBILIZATION_AND_TRANSPORT	KEGG_TGF_BETA_SIGNALING_PATHWAY	0.619834	0	1373	11	0	11
REACTOME_LIPID_DIGESTION_MOBILIZATION_AND_TRANSPORT	PID_FOXOPATHWAY	0.618193	0	1373	7	2	5
REACTOME_LOSS_OF_NLP_FROM_MITOTIC_CENTROSOMES	BIOCARTA_MET_PATHWAY	0.753923	0	1062	25	7	18
REACTOME_LOSS_OF_NLP_FROM_MITOTIC_CENTROSOMES	KEGG_INSULIN_SIGNALING_PATHWAY	0.650357	0	1062	41	7	34
REACTOME_LOSS_OF_NLP_FROM_MITOTIC_CENTROSOMES	KEGG_NEUROTROPHIN_SIGNALING_PATHWAY	0.606505	0	1062	50	9	41
REACTOME_LOSS_OF_NLP_FROM_MITOTIC_CENTROSOMES	KEGG_RENAL_CELL_CARCINOMA	0.762622	0	1062	34	8	26
REACTOME_LOSS_OF_NLP_FROM_MITOTIC_CENTROSOMES	PID_CXCR4_PATHWAY	0.603947	0	1062	40	8	32
REACTOME_LYSOSOME_VESICLE_BIOGENESIS	PID_NFAT_3PATHWAY	0.640597	0	1074	8	1	7
REACTOME_MAP_KINASE_ACTIVATION_IN_TLR_CASCADE	KEGG_ENDOCYTOSIS	0.661536	0	737	111	15	96
REACTOME_MAP_KINASE_ACTIVATION_IN_TLR_CASCADE	REACTOME_SIGNALING_BY_ERBB2	0.653808	0	737	82	12	70
REACTOME_MEIOSIS	KEGG_NEUROTROPHIN_SIGNALING_PATHWAY	0.606096	0	803	44	5	39
REACTOME_MEIOSIS	PID_MET_PATHWAY	0.621403	0	803	62	7	55
REACTOME_MEIOSIS	PID_PDGFRBPATHWAY	0.630277	0	803	73	6	67
REACTOME_MEIOSIS	PID_RET_PATHWAY	0.86734	0	803	28	6	22
REACTOME_MEIOTIC_RECOMBINATION	BIOCARTA_PYK2_PATHWAY	0.841287	0	882	9	0	9
REACTOME_MEIOTIC_RECOMBINATION	PID_MTOR_4PATHWAY	0.64698	0	882	16	1	15
REACTOME_MEIOTIC_RECOMBINATION	PID_RET_PATHWAY	0.785345	0	882	12	1	11
REACTOME_MEMBRANE_BINDING_AND_TARGETTING_OF_GAG_PROTEINS	KEGG_OOCYTE_MEIOSIS	0.603727	0	1064	5	0	5
REACTOME_METABOLISM_OF_AMINO_ACIDS_AND_DERIVATIVES	PID_HIF1_TFPATHWAY	0.716335	0	816	29	2	27
REACTOME_METABOLISM_OF_AMINO_ACIDS_AND_DERIVATIVES	PID_MTOR_4PATHWAY	0.766564	0	816	45	5	40
REACTOME_METABOLISM_OF_AMINO_ACIDS_AND_DERIVATIVES	PID_NFAT_3PATHWAY	0.914912	0	816	32	3	29
REACTOME_METABOLISM_OF_AMINO_ACIDS_AND_DERIVATIVES	REACTOME_MYOGENESIS	0.984029	0	816	9	0	9
REACTOME_METABOLISM_OF_AMINO_ACIDS_AND_DERIVATIVES	REACTOME_SIGNALING_BY_RHO_GTPASES	0.61185	0	816	35	3	32
REACTOME_METABOLISM_OF_CARBOHYDRATES	PID_NFAT_3PATHWAY	0.818211	0	770	65	8	57
REACTOME_METABOLISM_OF_LIPIDS_AND_LIPOPROTEINS	KEGG_ADHERENS_JUNCTION	0.887161	0	575	384	17	367
REACTOME_METABOLISM_OF_LIPIDS_AND_LIPOPROTEINS	KEGG_AXON_GUIDANCE	0.665844	0	575	390	39	351
REACTOME_METABOLISM_OF_LIPIDS_AND_LIPOPROTEINS	KEGG_MAPK_SIGNALING_PATHWAY	0.635926	0	575	576	71	505
REACTOME_METABOLISM_OF_LIPIDS_AND_LIPOPROTEINS	KEGG_PATHWAYS_IN_CANCER	0.614467	0	575	767	73	694
REACTOME_METABOLISM_OF_LIPIDS_AND_LIPOPROTEINS	KEGG_UBIQUITIN_MEDIATED_PROTEOLYSIS	0.759229	0	575	531	78	453
REACTOME_METABOLISM_OF_NUCLEOTIDES	KEGG_NEUROTROPHIN_SIGNALING_PATHWAY	0.608326	0	753	13	1	12
REACTOME_METABOLISM_OF_NUCLEOTIDES	KEGG_OOCYTE_MEIOSIS	0.646363	0	753	12	0	12
REACTOME_METABOLISM_OF_NUCLEOTIDES	KEGG_REGULATION_OF_ACTIN_CYTOSKELETON	0.687168	0	753	35	1	34
REACTOME_METABOLISM_OF_NUCLEOTIDES	PID_MTOR_4PATHWAY	0.682267	0	753	15	1	14
REACTOME_METABOLISM_OF_PROTEINS	PID_MTOR_4PATHWAY	0.773339	0	635	199	17	182
REACTOME_METABOLISM_OF_VITAMINS_AND_COFACTORS	REACTOME_SIGNALLING_BY_NGF	0.642799	0	573	48	3	45
REACTOME_METAL_ION_SLC_TRANSPORTERS	KEGG_OOCYTE_MEIOSIS	0.69094	0	557	20	5	15
REACTOME_MITOCHONDRIAL_PROTEIN_IMPORT	BIOCARTA_CHREBP2_PATHWAY	0.641673	0	1663	5	4	1
REACTOME_MITOCHONDRIAL_PROTEIN_IMPORT	PID_FOXOPATHWAY	0.630051	0	1663	7	3	4
REACTOME_MITOCHONDRIAL_PROTEIN_IMPORT	PID_MTOR_4PATHWAY	0.631794	0	1663	10	5	5
REACTOME_MITOCHONDRIAL_PROTEIN_IMPORT	PID_NCADHERINPATHWAY	0.700391	0	1663	1	0	1
REACTOME_MITOCHONDRIAL_PROTEIN_IMPORT	PID_PLK1_PATHWAY	0.608188	0	1663	4	5	-1
REACTOME_MITOCHONDRIAL_PROTEIN_IMPORT	PID_RHOA_PATHWAY	0.620929	0	1663	4	0	4
REACTOME_MITOCHONDRIAL_TRNA_AMINOACYLATION	KEGG_OOCYTE_MEIOSIS	0.782094	0	415	3	0	3
REACTOME_MITOTIC_G1_G1_S_PHASES	REACTOME_SIGNALING_BY_RHO_GTPASES	0.670285	0	742	49	5	44
REACTOME_MITOTIC_G2_G2_M_PHASES	KEGG_INSULIN_SIGNALING_PATHWAY	0.611127	0	918	54	7	47
REACTOME_MITOTIC_G2_G2_M_PHASES	KEGG_T_CELL_RECEPTOR_SIGNALING_PATHWAY	0.705139	0	918	50	7	43
REACTOME_MITOTIC_G2_G2_M_PHASES	REACTOME_SIGNALING_BY_ERBB2	0.623926	0	918	63	9	54
REACTOME_MITOTIC_G2_G2_M_PHASES	REACTOME_SIGNALING_BY_RHO_GTPASES	0.606194	0	918	45	8	37
REACTOME_MITOTIC_M_M_G1_PHASES	KEGG_ENDOCYTOSIS	0.625047	0	631	164	29	135
REACTOME_MITOTIC_M_M_G1_PHASES	KEGG_NEUROTROPHIN_SIGNALING_PATHWAY	0.608972	0	631	119	17	102
REACTOME_MITOTIC_M_M_G1_PHASES	PID_ERBB1_INTERNALIZATION_PATHWAY	0.769722	0	631	64	10	54
REACTOME_MITOTIC_M_M_G1_PHASES	PID_MTOR_4PATHWAY	0.829707	0	631	113	15	98
REACTOME_MITOTIC_M_M_G1_PHASES	REACTOME_NGF_SIGNALLING_VIA_TRKA_FROM_THE_PLASMA_MEMBRANE	0.60777	0	631	132	19	113
REACTOME_MITOTIC_PROMETAPHASE	PID_MTOR_4PATHWAY	0.733312	0	633	100	15	85
REACTOME_MRNA_3_END_PROCESSING	KEGG_OOCYTE_MEIOSIS	0.711949	0	650	34	2	32
REACTOME_MRNA_DECAY_BY_5_TO_3_EXORIBONUCLEASE	KEGG_WNT_SIGNALING_PATHWAY	0.681344	0	863	68	14	54
REACTOME_MRNA_PROCESSING	BIOCARTA_MET_PATHWAY	0.701814	0	748	84	14	70
REACTOME_MRNA_PROCESSING	KEGG_NEUROTROPHIN_SIGNALING_PATHWAY	0.614529	0	748	178	17	161
REACTOME_MRNA_PROCESSING	KEGG_OOCYTE_MEIOSIS	0.617228	0	748	159	12	147
REACTOME_MRNA_PROCESSING	PID_PDGFRBPATHWAY	0.611178	0	748	275	22	253
REACTOME_MRNA_SPLICING	PID_MTOR_4PATHWAY	0.701936	0	799	111	3	108
REACTOME_MRNA_SPLICING	PID_P38_MK2PATHWAY	0.977579	0	799	40	4	36
REACTOME_MRNA_SPLICING_MINOR_PATHWAY	REACTOME_SIGNALING_BY_RHO_GTPASES	0.666235	0	821	16	1	15
REACTOME_MTORC1_MEDIATED_SIGNALLING	KEGG_OOCYTE_MEIOSIS	0.84119	0	765	14	1	13
REACTOME_MTORC1_MEDIATED_SIGNALLING	REACTOME_OPIOID_SIGNALLING	0.771875	0	765	7	3	4
REACTOME_M_G1_TRANSITION	BIOCARTA_AT1R_PATHWAY	0.906634	0	1052	7	1	6
REACTOME_M_G1_TRANSITION	BIOCARTA_HER2_PATHWAY	0.931309	0	1052	5	1	4
REACTOME_M_G1_TRANSITION	BIOCARTA_TCR_PATHWAY	0.83865	0	1052	7	1	6
REACTOME_M_G1_TRANSITION	REACTOME_SIGNALING_BY_EGFR_IN_CANCER	0.630971	0	1052	15	1	14
REACTOME_NA_CL_DEPENDENT_NEUROTRANSMITTER_TRANSPORTERS	KEGG_AXON_GUIDANCE	0.620746	0	569	1	0	1
REACTOME_NCAM1_INTERACTIONS	PID_FOXOPATHWAY	0.62483	0	1044	0	0	0
REACTOME_NCAM1_INTERACTIONS	PID_INSULIN_PATHWAY	0.769612	0	1044	0	0	0
REACTOME_NEF_MEDIATES_DOWN_MODULATION_OF_CELL_SURFACE_RECEPTORS_BY_RECRUITING_THEM_TO_CLATHRIN_ADAPTERS	PID_NFAT_3PATHWAY	0.6755	0	1079	13	1	12
REACTOME_NEF_MEDIATES_DOWN_MODULATION_OF_CELL_SURFACE_RECEPTORS_BY_RECRUITING_THEM_TO_CLATHRIN_ADAPTERS	REACTOME_SIGNALING_BY_RHO_GTPASES	0.656896	0	1079	22	0	22
REACTOME_NEGATIVE_REGULATORS_OF_RIG_I_MDA5_SIGNALING	KEGG_T_CELL_RECEPTOR_SIGNALING_PATHWAY	0.676324	0	867	19	1	18
REACTOME_NEGATIVE_REGULATORS_OF_RIG_I_MDA5_SIGNALING	PID_MTOR_4PATHWAY	0.739559	0	867	29	3	26
REACTOME_NEGATIVE_REGULATORS_OF_RIG_I_MDA5_SIGNALING	PID_NFAT_3PATHWAY	0.836131	0	867	15	2	13
REACTOME_NEGATIVE_REGULATORS_OF_RIG_I_MDA5_SIGNALING	REACTOME_NGF_SIGNALLING_VIA_TRKA_FROM_THE_PLASMA_MEMBRANE	0.637204	0	867	28	2	26
REACTOME_NEGATIVE_REGULATORS_OF_RIG_I_MDA5_SIGNALING	REACTOME_SIGNALING_BY_ERBB2	0.664972	0	867	29	2	27
REACTOME_NEPHRIN_INTERACTIONS	PID_SMAD2_3NUCLEARPATHWAY	0.719767	0	708	42	5	37
REACTOME_NEURONAL_SYSTEM	KEGG_UBIQUITIN_MEDIATED_PROTEOLYSIS	0.783093	0	552	185	26	159
REACTOME_NEUROTRANSMITTER_RELEASE_CYCLE	KEGG_WNT_SIGNALING_PATHWAY	0.649825	0	930	19	1	18
REACTOME_NITRIC_OXIDE_STIMULATES_GUANYLATE_CYCLASE	KEGG_TGF_BETA_SIGNALING_PATHWAY	0.769442	0	542	8	0	8
REACTOME_NITRIC_OXIDE_STIMULATES_GUANYLATE_CYCLASE	PID_LKB1_PATHWAY	0.908671	0	542	7	0	7
REACTOME_NONSENSE_MEDIATED_DECAY_ENHANCED_BY_THE_EXON_JUNCTION_COMPLEX	KEGG_OOCYTE_MEIOSIS	0.647042	0	774	16	6	10
REACTOME_NONSENSE_MEDIATED_DECAY_ENHANCED_BY_THE_EXON_JUNCTION_COMPLEX	PID_MTOR_4PATHWAY	0.705557	0	774	37	11	26
REACTOME_NOTCH1_INTRACELLULAR_DOMAIN_REGULATES_TRANSCRIPTION	KEGG_OOCYTE_MEIOSIS	0.689867	0	647	29	1	28
REACTOME_NOTCH1_INTRACELLULAR_DOMAIN_REGULATES_TRANSCRIPTION	PID_PDGFRBPATHWAY	0.601219	0	647	51	2	49
REACTOME_NOTCH_HLH_TRANSCRIPTION_PATHWAY	KEGG_UBIQUITIN_MEDIATED_PROTEOLYSIS	0.660878	0	674	25	0	25
REACTOME_NRAGE_SIGNALS_DEATH_THROUGH_JNK	PID_FAK_PATHWAY	0.701595	0	762	54	3	51
REACTOME_NRAGE_SIGNALS_DEATH_THROUGH_JNK	REACTOME_SIGNALING_BY_TGF_BETA_RECEPTOR_COMPLEX	0.84434	0	762	45	6	39
REACTOME_NUCLEAR_EVENTS_KINASE_AND_TRANSCRIPTION_FACTOR_ACTIVATION	REACTOME_SEMAPHORIN_INTERACTIONS	0.60104	0	910	18	4	14
REACTOME_NUCLEAR_RECEPTOR_TRANSCRIPTION_PATHWAY	PID_PI3KCIPATHWAY	0.868757	0	657	7	0	7
REACTOME_NUCLEAR_SIGNALING_BY_ERBB4	PID_HIF1_TFPATHWAY	0.697743	0	679	13	0	13
REACTOME_NUCLEOTIDE_EXCISION_REPAIR	KEGG_LONG_TERM_POTENTIATION	0.664533	0	1078	6	0	6
REACTOME_NUCLEOTIDE_EXCISION_REPAIR	KEGG_OOCYTE_MEIOSIS	0.640813	0	1078	9	0	9
REACTOME_NUCLEOTIDE_EXCISION_REPAIR	KEGG_WNT_SIGNALING_PATHWAY	0.698108	0	1078	8	0	8
REACTOME_N_GLYCAN_ANTENNAE_ELONGATION_IN_THE_MEDIAL_TRANS_GOLGI	PID_LKB1_PATHWAY	0.876096	0	536	8	0	8
REACTOME_OLFACTORY_SIGNALING_PATHWAY	KEGG_UBIQUITIN_MEDIATED_PROTEOLYSIS	0.725096	0	319	0	0	0
REACTOME_OPIOID_SIGNALLING	KEGG_UBIQUITIN_MEDIATED_PROTEOLYSIS	0.697944	0	721	113	22	91
REACTOME_OPIOID_SIGNALLING	PID_CMYB_PATHWAY	0.746644	0	721	59	7	52
REACTOME_OTHER_SEMAPHORIN_INTERACTIONS	KEGG_TIGHT_JUNCTION	0.62244	0	961	16	0	16
REACTOME_OXYGEN_DEPENDENT_PROLINE_HYDROXYLATION_OF_HYPOXIA_INDUCIBLE_FACTOR_ALPHA	PID_ER_NONGENOMIC_PATHWAY	0.683751	0	1754	6	3	3
REACTOME_OXYGEN_DEPENDENT_PROLINE_HYDROXYLATION_OF_HYPOXIA_INDUCIBLE_FACTOR_ALPHA	SIG_CHEMOTAXIS	0.666405	0	1754	5	1	4
REACTOME_OXYGEN_DEPENDENT_PROLINE_HYDROXYLATION_OF_HYPOXIA_INDUCIBLE_FACTOR_ALPHA	SIG_INSULIN_RECEPTOR_PATHWAY_IN_CARDIAC_MYOCYTES	0.614985	0	1754	4	3	1
REACTOME_OXYGEN_DEPENDENT_PROLINE_HYDROXYLATION_OF_HYPOXIA_INDUCIBLE_FACTOR_ALPHA	ST_PHOSPHOINOSITIDE_3_KINASE_PATHWAY	0.735144	0	1754	1	3	-2
REACTOME_O_LINKED_GLYCOSYLATION_OF_MUCINS	REACTOME_SIGNALING_BY_RHO_GTPASES	0.618924	0	614	16	1	15
REACTOME_P53_DEPENDENT_G1_DNA_DAMAGE_RESPONSE	PID_NFAT_3PATHWAY	0.862845	0	1050	11	2	9
REACTOME_P75_NTR_RECEPTOR_MEDIATED_SIGNALLING	KEGG_ENDOCYTOSIS	0.676544	0	852	151	14	137
REACTOME_P75_NTR_RECEPTOR_MEDIATED_SIGNALLING	KEGG_OOCYTE_MEIOSIS	0.626622	0	852	62	5	57
REACTOME_P75_NTR_RECEPTOR_MEDIATED_SIGNALLING	KEGG_REGULATION_OF_ACTIN_CYTOSKELETON	0.669804	0	852	149	16	133
REACTOME_P75_NTR_RECEPTOR_MEDIATED_SIGNALLING	KEGG_RENAL_CELL_CARCINOMA	0.678435	0	852	52	2	50
REACTOME_P75_NTR_RECEPTOR_MEDIATED_SIGNALLING	KEGG_UBIQUITIN_MEDIATED_PROTEOLYSIS	0.601095	0	852	111	17	94
REACTOME_P75_NTR_RECEPTOR_MEDIATED_SIGNALLING	PID_ERBB1_INTERNALIZATION_PATHWAY	0.758281	0	852	45	7	38
REACTOME_P75_NTR_RECEPTOR_MEDIATED_SIGNALLING	REACTOME_OPIOID_SIGNALLING	0.71688	0	852	50	5	45
REACTOME_PACKAGING_OF_TELOMERE_ENDS	KEGG_OOCYTE_MEIOSIS	0.61929	0	1067	1	0	1
REACTOME_PACKAGING_OF_TELOMERE_ENDS	ST_JNK_MAPK_PATHWAY	0.725032	0	1067	0	0	0
REACTOME_PECAM1_INTERACTIONS	KEGG_UBIQUITIN_MEDIATED_PROTEOLYSIS	0.729342	0	552	29	0	29
REACTOME_PECAM1_INTERACTIONS	PID_ERBB1_INTERNALIZATION_PATHWAY	0.840396	0	552	10	1	9
REACTOME_PECAM1_INTERACTIONS	REACTOME_ADAPTIVE_IMMUNE_SYSTEM	0.601871	0	552	73	3	70
REACTOME_PECAM1_INTERACTIONS	REACTOME_SIGNALING_BY_RHO_GTPASES	0.647799	0	552	21	1	20
REACTOME_PEPTIDE_CHAIN_ELONGATION	PID_GLYPICAN_1PATHWAY	0.843891	0	951	5	0	5
REACTOME_PEPTIDE_CHAIN_ELONGATION	PID_NETRIN_PATHWAY	0.824379	0	951	0	0	0
REACTOME_PEPTIDE_CHAIN_ELONGATION	REACTOME_MEMBRANE_TRAFFICKING	0.61058	0	951	0	0	0
REACTOME_PEPTIDE_CHAIN_ELONGATION	REACTOME_TRANS_GOLGI_NETWORK_VESICLE_BUDDING	0.68281	0	951	0	0	0
REACTOME_PERK_REGULATED_GENE_EXPRESSION	KEGG_UBIQUITIN_MEDIATED_PROTEOLYSIS	0.649449	0	623	37	5	32
REACTOME_PHOSPHOLIPASE_C_MEDIATED_CASCADE	KEGG_UBIQUITIN_MEDIATED_PROTEOLYSIS	0.761474	0	606	60	8	52
REACTOME_PHOSPHOLIPID_METABOLISM	KEGG_UBIQUITIN_MEDIATED_PROTEOLYSIS	0.750165	0	551	244	48	196
REACTOME_PHOSPHORYLATION_OF_THE_APC_C	KEGG_AXON_GUIDANCE	0.619795	0	1118	8	1	7
REACTOME_PHOSPHORYLATION_OF_THE_APC_C	KEGG_OOCYTE_MEIOSIS	0.600591	0	1118	10	2	8
REACTOME_PHOSPHORYLATION_OF_THE_APC_C	PID_NFAT_3PATHWAY	0.682096	0	1118	8	3	5
REACTOME_PHOSPHORYLATION_OF_THE_APC_C	REACTOME_SIGNALING_BY_RHO_GTPASES	0.629111	0	1118	13	2	11
REACTOME_PHOSPHORYLATION_OF_THE_APC_C	REACTOME_TRANS_GOLGI_NETWORK_VESICLE_BUDDING	0.640007	0	1118	15	2	13
REACTOME_PI3K_AKT_ACTIVATION	KEGG_OOCYTE_MEIOSIS	0.656254	0	836	39	8	31
REACTOME_PI3K_AKT_ACTIVATION	KEGG_UBIQUITIN_MEDIATED_PROTEOLYSIS	0.641812	0	836	74	21	53
REACTOME_PI3K_AKT_ACTIVATION	PID_CMYB_PATHWAY	0.76312	0	836	57	9	48
REACTOME_PI3K_AKT_ACTIVATION	PID_ERBB1_DOWNSTREAM_PATHWAY	0.655774	0	836	66	14	52
REACTOME_PI3K_AKT_ACTIVATION	PID_SMAD2_3NUCLEARPATHWAY	0.610865	0	836	57	13	44
REACTOME_PI3K_EVENTS_IN_ERBB2_SIGNALING	PID_CMYB_PATHWAY	0.857654	0	670	65	9	56
REACTOME_PI3K_EVENTS_IN_ERBB4_SIGNALING	KEGG_LONG_TERM_DEPRESSION	0.940696	0	776	28	3	25
REACTOME_PI3K_EVENTS_IN_ERBB4_SIGNALING	PID_ERBB1_DOWNSTREAM_PATHWAY	0.642431	0	776	62	14	48
REACTOME_PI3K_EVENTS_IN_ERBB4_SIGNALING	PID_SMAD2_3NUCLEARPATHWAY	0.703269	0	776	48	13	35
REACTOME_PIP3_ACTIVATES_AKT_SIGNALING	PID_CMYB_PATHWAY	0.736692	0	859	43	9	34
REACTOME_PIP3_ACTIVATES_AKT_SIGNALING	PID_ERBB1_DOWNSTREAM_PATHWAY	0.639003	0	859	56	14	42
REACTOME_PI_METABOLISM	KEGG_UBIQUITIN_MEDIATED_PROTEOLYSIS	0.744309	0	584	134	36	98
REACTOME_PKA_MEDIATED_PHOSPHORYLATION_OF_CREB	KEGG_UBIQUITIN_MEDIATED_PROTEOLYSIS	0.754791	0	544	42	8	34
REACTOME_PKB_MEDIATED_EVENTS	PID_AR_TF_PATHWAY	0.872996	0	817	34	3	31
REACTOME_PKB_MEDIATED_EVENTS	PID_HIF1_TFPATHWAY	0.821729	0	817	28	2	26
REACTOME_PKB_MEDIATED_EVENTS	PID_PI3KCIPATHWAY	0.719966	0	817	18	0	18
REACTOME_PKB_MEDIATED_EVENTS	REACTOME_NGF_SIGNALLING_VIA_TRKA_FROM_THE_PLASMA_MEMBRANE	0.654789	0	817	48	8	40
REACTOME_PKB_MEDIATED_EVENTS	REACTOME_OPIOID_SIGNALLING	0.717005	0	817	21	5	16
REACTOME_PLATELET_ACTIVATION_SIGNALING_AND_AGGREGATION	KEGG_UBIQUITIN_MEDIATED_PROTEOLYSIS	0.77869	0	671	171	25	146
REACTOME_PLATELET_CALCIUM_HOMEOSTASIS	PID_NCADHERINPATHWAY	0.639663	0	1637	3	1	2
REACTOME_PLATELET_HOMEOSTASIS	PID_ERBB1_INTERNALIZATION_PATHWAY	0.789366	0	760	20	0	20
REACTOME_PLATELET_HOMEOSTASIS	PID_MTOR_4PATHWAY	0.721154	0	760	32	2	30
REACTOME_PLC_BETA_MEDIATED_EVENTS	KEGG_UBIQUITIN_MEDIATED_PROTEOLYSIS	0.721611	0	628	91	18	73
REACTOME_POST_TRANSLATIONAL_MODIFICATION_SYNTHESIS_OF_GPI_ANCHORED_PROTEINS	REACTOME_OPIOID_SIGNALLING	0.75901	0	556	4	0	4
REACTOME_POST_TRANSLATIONAL_PROTEIN_MODIFICATION	PID_MYC_ACTIVPATHWAY	0.726941	0	535	59	0	59
REACTOME_POST_TRANSLATIONAL_PROTEIN_MODIFICATION	REACTOME_SIGNALLING_BY_NGF	0.622138	0	535	195	5	190
REACTOME_PPARA_ACTIVATES_GENE_EXPRESSION	KEGG_FOCAL_ADHESION	0.605759	0	650	167	25	142
REACTOME_PPARA_ACTIVATES_GENE_EXPRESSION	KEGG_NEUROTROPHIN_SIGNALING_PATHWAY	0.605506	0	650	135	16	119
REACTOME_PPARA_ACTIVATES_GENE_EXPRESSION	KEGG_UBIQUITIN_MEDIATED_PROTEOLYSIS	0.66202	0	650	201	27	174
REACTOME_PPARA_ACTIVATES_GENE_EXPRESSION	PID_CMYB_PATHWAY	0.747876	0	650	106	5	101
REACTOME_PPARA_ACTIVATES_GENE_EXPRESSION	PID_ECADHERIN_NASCENTAJ_PATHWAY	0.861059	0	650	51	0	51
REACTOME_PPARA_ACTIVATES_GENE_EXPRESSION	PID_ERBB1_INTERNALIZATION_PATHWAY	0.831435	0	650	72	6	66
REACTOME_PPARA_ACTIVATES_GENE_EXPRESSION	PID_FAK_PATHWAY	0.701698	0	650	113	6	107
REACTOME_PPARA_ACTIVATES_GENE_EXPRESSION	PID_PDGFRBPATHWAY	0.62862	0	650	175	18	157
REACTOME_PPARA_ACTIVATES_GENE_EXPRESSION	PID_TGFBRPATHWAY	0.825768	0	650	135	10	125
REACTOME_PREFOLDIN_MEDIATED_TRANSFER_OF_SUBSTRATE_TO_CCT_TRIC	BIOCARTA_GCR_PATHWAY	0.981223	0	913	1	0	1
REACTOME_PREFOLDIN_MEDIATED_TRANSFER_OF_SUBSTRATE_TO_CCT_TRIC	KEGG_NEUROTROPHIN_SIGNALING_PATHWAY	0.603035	0	913	6	2	4
REACTOME_PREFOLDIN_MEDIATED_TRANSFER_OF_SUBSTRATE_TO_CCT_TRIC	PID_CXCR4_PATHWAY	0.643414	0	913	5	1	4
REACTOME_PREFOLDIN_MEDIATED_TRANSFER_OF_SUBSTRATE_TO_CCT_TRIC	PID_ERBB1_DOWNSTREAM_PATHWAY	0.656301	0	913	6	0	6
REACTOME_PREFOLDIN_MEDIATED_TRANSFER_OF_SUBSTRATE_TO_CCT_TRIC	PID_MTOR_4PATHWAY	0.735318	0	913	6	0	6
REACTOME_PREFOLDIN_MEDIATED_TRANSFER_OF_SUBSTRATE_TO_CCT_TRIC	PID_P38_MK2PATHWAY	0.906127	0	913	3	0	3
REACTOME_PREFOLDIN_MEDIATED_TRANSFER_OF_SUBSTRATE_TO_CCT_TRIC	PID_PDGFRBPATHWAY	0.624968	0	913	9	1	8
REACTOME_PREFOLDIN_MEDIATED_TRANSFER_OF_SUBSTRATE_TO_CCT_TRIC	PID_PI3KCIAKTPATHWAY	0.687749	0	913	5	0	5
REACTOME_PREFOLDIN_MEDIATED_TRANSFER_OF_SUBSTRATE_TO_CCT_TRIC	ST_PHOSPHOINOSITIDE_3_KINASE_PATHWAY	0.651107	0	913	3	0	3
REACTOME_PRE_NOTCH_EXPRESSION_AND_PROCESSING	KEGG_UBIQUITIN_MEDIATED_PROTEOLYSIS	0.664883	0	594	100	7	93
REACTOME_PRE_NOTCH_EXPRESSION_AND_PROCESSING	PID_PDGFRBPATHWAY	0.611699	0	594	100	5	95
REACTOME_PRE_NOTCH_PROCESSING_IN_GOLGI	KEGG_TIGHT_JUNCTION	0.638531	0	1202	16	0	16
REACTOME_PRE_NOTCH_TRANSCRIPTION_AND_TRANSLATION	PID_PDGFRBPATHWAY	0.636324	0	568	82	4	78
REACTOME_PROCESSING_OF_CAPPED_INTRON_CONTAINING_PRE_MRNA	KEGG_NEUROTROPHIN_SIGNALING_PATHWAY	0.607623	0	769	152	16	136
REACTOME_PROCESSING_OF_CAPPED_INTRON_CONTAINING_PRE_MRNA	PID_INSULIN_PATHWAY	0.67013	0	769	66	13	53
REACTOME_PROLONGED_ERK_ACTIVATION_EVENTS	KEGG_UBIQUITIN_MEDIATED_PROTEOLYSIS	0.640539	0	626	68	14	54
REACTOME_PROLONGED_ERK_ACTIVATION_EVENTS	PID_ERBB1_INTERNALIZATION_PATHWAY	0.853092	0	626	16	3	13
REACTOME_PROSTACYCLIN_SIGNALLING_THROUGH_PROSTACYCLIN_RECEPTOR	KEGG_MAPK_SIGNALING_PATHWAY	0.674976	0	569	18	0	18
REACTOME_PROTEIN_FOLDING	KEGG_NEUROTROPHIN_SIGNALING_PATHWAY	0.638338	0	641	36	6	30
REACTOME_PROTEIN_FOLDING	KEGG_REGULATION_OF_ACTIN_CYTOSKELETON	0.621377	0	641	58	5	53
REACTOME_PROTEIN_FOLDING	KEGG_UBIQUITIN_MEDIATED_PROTEOLYSIS	0.649631	0	641	54	6	48
REACTOME_PROTEIN_FOLDING	KEGG_WNT_SIGNALING_PATHWAY	0.740059	0	641	52	4	48
REACTOME_PROTEIN_FOLDING	PID_MET_PATHWAY	0.700123	0	641	54	4	50
REACTOME_PURINE_METABOLISM	KEGG_REGULATION_OF_ACTIN_CYTOSKELETON	0.602265	0	720	16	0	16
REACTOME_PURINE_RIBONUCLEOSIDE_MONOPHOSPHATE_BIOSYNTHESIS	REACTOME_SIGNALING_BY_ERBB2	0.605626	0	548	5	0	5
REACTOME_PURINE_SALVAGE	KEGG_OOCYTE_MEIOSIS	0.694615	0	602	2	0	2
REACTOME_PYRIMIDINE_METABOLISM	KEGG_OOCYTE_MEIOSIS	0.667572	0	615	2	0	2
REACTOME_PYRIMIDINE_METABOLISM	PID_MTOR_4PATHWAY	0.713069	0	615	7	0	7
REACTOME_RAF_MAP_KINASE_CASCADE	KEGG_ENDOCYTOSIS	0.77324	0	585	55	5	50
REACTOME_RAF_MAP_KINASE_CASCADE	REACTOME_SIGNALLING_BY_NGF	0.604683	0	585	41	3	38
REACTOME_RAP1_SIGNALLING	PID_MYC_ACTIVPATHWAY	0.602107	0	1190	1	1	0
REACTOME_RECRUITMENT_OF_MITOTIC_CENTROSOME_PROTEINS_AND_COMPLEXES	BIOCARTA_PYK2_PATHWAY	0.85574	0	1016	18	4	14
REACTOME_RECRUITMENT_OF_MITOTIC_CENTROSOME_PROTEINS_AND_COMPLEXES	KEGG_GLIOMA	0.687323	0	1016	24	3	21
REACTOME_RECRUITMENT_OF_MITOTIC_CENTROSOME_PROTEINS_AND_COMPLEXES	KEGG_INSULIN_SIGNALING_PATHWAY	0.646099	0	1016	41	7	34
REACTOME_RECRUITMENT_OF_MITOTIC_CENTROSOME_PROTEINS_AND_COMPLEXES	KEGG_RENAL_CELL_CARCINOMA	0.725515	0	1016	34	8	26
REACTOME_RECRUITMENT_OF_MITOTIC_CENTROSOME_PROTEINS_AND_COMPLEXES	KEGG_TIGHT_JUNCTION	0.74201	0	1016	51	2	49
REACTOME_RECRUITMENT_OF_MITOTIC_CENTROSOME_PROTEINS_AND_COMPLEXES	PID_PDGFRBPATHWAY	0.603044	0	1016	63	13	50
REACTOME_RECRUITMENT_OF_MITOTIC_CENTROSOME_PROTEINS_AND_COMPLEXES	REACTOME_OPIOID_SIGNALLING	0.810427	0	1016	21	4	17
REACTOME_RECRUITMENT_OF_MITOTIC_CENTROSOME_PROTEINS_AND_COMPLEXES	REACTOME_SIGNALING_BY_RHO_GTPASES	0.617281	0	1016	38	7	31
REACTOME_RECRUITMENT_OF_NUMA_TO_MITOTIC_CENTROSOMES	KEGG_OOCYTE_MEIOSIS	0.6113	0	986	9	0	9
REACTOME_REGULATION_OF_AMPK_ACTIVITY_VIA_LKB1	PID_MTOR_4PATHWAY	0.646987	0	987	19	1	18
REACTOME_REGULATION_OF_AMPK_ACTIVITY_VIA_LKB1	PID_PI3KCIPATHWAY	0.689698	0	987	8	0	8
REACTOME_REGULATION_OF_AMPK_ACTIVITY_VIA_LKB1	PID_RET_PATHWAY	0.796474	0	987	9	2	7
REACTOME_REGULATION_OF_APOPTOSIS	KEGG_AXON_GUIDANCE	0.649827	0	943	28	6	22
REACTOME_REGULATION_OF_APOPTOSIS	REACTOME_SIGNALING_BY_RHO_GTPASES	0.609538	0	943	20	4	16
REACTOME_REGULATION_OF_BETA_CELL_DEVELOPMENT	KEGG_CHRONIC_MYELOID_LEUKEMIA	0.73217	0	1259	9	2	7
REACTOME_REGULATION_OF_BETA_CELL_DEVELOPMENT	PID_RB_1PATHWAY	0.647925	0	1259	1	2	-1
REACTOME_REGULATION_OF_GLUCOKINASE_BY_GLUCOKINASE_REGULATORY_PROTEIN	KEGG_FOCAL_ADHESION	0.603436	0	658	54	13	41
REACTOME_REGULATION_OF_GLUCOKINASE_BY_GLUCOKINASE_REGULATORY_PROTEIN	KEGG_NEUROTROPHIN_SIGNALING_PATHWAY	0.623304	0	658	47	9	38
REACTOME_REGULATION_OF_GLUCOKINASE_BY_GLUCOKINASE_REGULATORY_PROTEIN	PID_MET_PATHWAY	0.670398	0	658	77	15	62
REACTOME_REGULATION_OF_GLUCOKINASE_BY_GLUCOKINASE_REGULATORY_PROTEIN	PID_PDGFRBPATHWAY	0.631186	0	658	72	12	60
REACTOME_REGULATION_OF_HYPOXIA_INDUCIBLE_FACTOR_HIF_BY_OXYGEN	BIOCARTA_PYK2_PATHWAY	0.669737	0	1553	7	3	4
REACTOME_REGULATION_OF_HYPOXIA_INDUCIBLE_FACTOR_HIF_BY_OXYGEN	KEGG_T_CELL_RECEPTOR_SIGNALING_PATHWAY	0.609583	0	1553	17	3	14
REACTOME_REGULATION_OF_HYPOXIA_INDUCIBLE_FACTOR_HIF_BY_OXYGEN	PID_ER_NONGENOMIC_PATHWAY	0.676379	0	1553	11	3	8
REACTOME_REGULATION_OF_HYPOXIA_INDUCIBLE_FACTOR_HIF_BY_OXYGEN	PID_KITPATHWAY	0.627955	0	1553	16	4	12
REACTOME_REGULATION_OF_HYPOXIA_INDUCIBLE_FACTOR_HIF_BY_OXYGEN	PID_RET_PATHWAY	0.634876	0	1553	7	4	3
REACTOME_REGULATION_OF_HYPOXIA_INDUCIBLE_FACTOR_HIF_BY_OXYGEN	PID_RHOA_PATHWAY	0.683769	0	1553	4	3	1
REACTOME_REGULATION_OF_HYPOXIA_INDUCIBLE_FACTOR_HIF_BY_OXYGEN	REACTOME_SIGNALING_BY_FGFR_IN_DISEASE	0.603458	0	1553	20	5	15
REACTOME_REGULATION_OF_HYPOXIA_INDUCIBLE_FACTOR_HIF_BY_OXYGEN	REACTOME_SIGNALING_BY_RHO_GTPASES	0.620221	0	1553	12	1	11
REACTOME_REGULATION_OF_HYPOXIA_INDUCIBLE_FACTOR_HIF_BY_OXYGEN	SIG_CHEMOTAXIS	0.722106	0	1553	6	1	5
REACTOME_REGULATION_OF_HYPOXIA_INDUCIBLE_FACTOR_HIF_BY_OXYGEN	SIG_INSULIN_RECEPTOR_PATHWAY_IN_CARDIAC_MYOCYTES	0.62771	0	1553	9	4	5
REACTOME_REGULATION_OF_IFNG_SIGNALING	KEGG_REGULATION_OF_ACTIN_CYTOSKELETON	0.626862	0	909	22	0	22
REACTOME_REGULATION_OF_IFNG_SIGNALING	PID_MYC_ACTIVPATHWAY	0.624429	0	909	6	0	6
REACTOME_REGULATION_OF_IFNG_SIGNALING	PID_P53DOWNSTREAMPATHWAY	0.60046	0	909	11	0	11
REACTOME_REGULATION_OF_INSULIN_LIKE_GROWTH_FACTOR_IGF_ACTIVITY_BY_INSULIN_LIKE_GROWTH_FACTOR_BINDING_PROTEINS_IGFBPS	PID_ERBB1_RECEPTOR_PROXIMAL_PATHWAY	0.687373	0	990	0	0	0
REACTOME_REGULATION_OF_INSULIN_SECRETION	KEGG_REGULATION_OF_ACTIN_CYTOSKELETON	0.687211	0	570	103	1	102
REACTOME_REGULATION_OF_INSULIN_SECRETION_BY_ACETYLCHOLINE	KEGG_PATHWAYS_IN_CANCER	0.614231	0	633	28	0	28
REACTOME_REGULATION_OF_INSULIN_SECRETION_BY_ACETYLCHOLINE	PID_TGFBRPATHWAY	0.72312	0	633	20	0	20
REACTOME_REGULATION_OF_INSULIN_SECRETION_BY_GLUCAGON_LIKE_PEPTIDE1	KEGG_MAPK_SIGNALING_PATHWAY	0.625162	0	856	48	1	47
REACTOME_REGULATION_OF_INSULIN_SECRETION_BY_GLUCAGON_LIKE_PEPTIDE1	KEGG_UBIQUITIN_MEDIATED_PROTEOLYSIS	0.613791	0	856	34	1	33
REACTOME_REGULATION_OF_MITOTIC_CELL_CYCLE	KEGG_T_CELL_RECEPTOR_SIGNALING_PATHWAY	0.656316	0	1340	17	3	14
REACTOME_REGULATION_OF_MITOTIC_CELL_CYCLE	PID_INSULIN_PATHWAY	0.715684	0	1340	6	2	4
REACTOME_REGULATION_OF_MITOTIC_CELL_CYCLE	PID_MYC_REPRESSPATHWAY	0.728737	0	1340	8	0	8
REACTOME_REGULATION_OF_MITOTIC_CELL_CYCLE	PID_NFAT_3PATHWAY	0.679241	0	1340	14	5	9
REACTOME_REGULATION_OF_MITOTIC_CELL_CYCLE	REACTOME_SIGNALING_BY_RHO_GTPASES	0.631361	0	1340	15	3	12
REACTOME_REGULATION_OF_MITOTIC_CELL_CYCLE	REACTOME_SIGNALING_BY_ROBO_RECEPTOR	0.70131	0	1340	4	2	2
REACTOME_REGULATION_OF_MRNA_STABILITY_BY_PROTEINS_THAT_BIND_AU_RICH_ELEMENTS	PID_HIF1_TFPATHWAY	0.64315	0	760	29	5	24
REACTOME_REGULATION_OF_ORNITHINE_DECARBOXYLASE_ODC	PID_MYC_REPRESSPATHWAY	0.602809	0	966	3	0	3
REACTOME_REGULATION_OF_ORNITHINE_DECARBOXYLASE_ODC	PID_NFAT_3PATHWAY	0.728637	0	966	9	3	6
REACTOME_REGULATION_OF_PYRUVATE_DEHYDROGENASE_PDH_COMPLEX	PID_NETRIN_PATHWAY	0.800029	0	1088	3	0	3
REACTOME_REGULATION_OF_PYRUVATE_DEHYDROGENASE_PDH_COMPLEX	REACTOME_L1CAM_INTERACTIONS	0.657958	0	1088	7	0	7
REACTOME_REGULATION_OF_RHEB_GTPASE_ACTIVITY_BY_AMPK	PID_NFAT_3PATHWAY	0.620048	0	1127	10	0	10
REACTOME_REGULATION_OF_SIGNALING_BY_CBL	PID_CMYB_PATHWAY	0.75017	0	608	40	3	37
REACTOME_REGULATION_OF_THE_FANCONI_ANEMIA_PATHWAY	BIOCARTA_INTEGRIN_PATHWAY	0.733743	0	458	3	0	3
REACTOME_REGULATION_OF_THE_FANCONI_ANEMIA_PATHWAY	KEGG_FOCAL_ADHESION	0.714086	0	458	14	1	13
REACTOME_REGULATION_OF_THE_FANCONI_ANEMIA_PATHWAY	PID_INSULIN_PATHWAY	0.742188	0	458	2	0	2
REACTOME_REGULATION_OF_THE_FANCONI_ANEMIA_PATHWAY	PID_MET_PATHWAY	0.723586	0	458	15	0	15
REACTOME_REGULATION_OF_THE_FANCONI_ANEMIA_PATHWAY	REACTOME_NGF_SIGNALLING_VIA_TRKA_FROM_THE_PLASMA_MEMBRANE	0.609084	0	458	7	1	6
REACTOME_REGULATION_OF_THE_FANCONI_ANEMIA_PATHWAY	REACTOME_PLATELET_ACTIVATION_SIGNALING_AND_AGGREGATION	0.666073	0	458	6	0	6
REACTOME_REGULATION_OF_THE_FANCONI_ANEMIA_PATHWAY	REACTOME_SIGNALLING_BY_NGF	0.612031	0	458	13	3	10
REACTOME_REGULATION_OF_WATER_BALANCE_BY_RENAL_AQUAPORINS	KEGG_MAPK_SIGNALING_PATHWAY	0.728184	0	419	56	2	54
REACTOME_REGULATION_OF_WATER_BALANCE_BY_RENAL_AQUAPORINS	KEGG_UBIQUITIN_MEDIATED_PROTEOLYSIS	0.827182	0	419	46	4	42
REACTOME_REGULATION_OF_WATER_BALANCE_BY_RENAL_AQUAPORINS	REACTOME_SIGNALLING_BY_NGF	0.610024	0	419	57	4	53
REACTOME_RESOLUTION_OF_AP_SITES_VIA_THE_MULTIPLE_NUCLEOTIDE_PATCH_REPLACEMENT_PATHWAY	KEGG_NEUROTROPHIN_SIGNALING_PATHWAY	0.603153	0	585	7	2	5
REACTOME_RESOLUTION_OF_AP_SITES_VIA_THE_SINGLE_NUCLEOTIDE_REPLACEMENT_PATHWAY	PID_PDGFRBPATHWAY	0.660354	0	585	13	1	12
REACTOME_RESPIRATORY_ELECTRON_TRANSPORT	PID_BMPPATHWAY	0.607202	0	1750	0	0	0
REACTOME_RESPIRATORY_ELECTRON_TRANSPORT	PID_LKB1_PATHWAY	0.609607	0	1750	0	0	0
REACTOME_RESPIRATORY_ELECTRON_TRANSPORT_ATP_SYNTHESIS_BY_CHEMIOSMOTIC_COUPLING_AND_HEAT_PRODUCTION_BY_UNCOUPLING_PROTEINS_	PID_HIF1_TFPATHWAY	0.610121	0	1869	2	0	2
REACTOME_RESPIRATORY_ELECTRON_TRANSPORT_ATP_SYNTHESIS_BY_CHEMIOSMOTIC_COUPLING_AND_HEAT_PRODUCTION_BY_UNCOUPLING_PROTEINS_	PID_HNF3APATHWAY	0.697249	0	1869	0	0	0
REACTOME_RESPONSE_TO_ELEVATED_PLATELET_CYTOSOLIC_CA2_	PID_HIF1_TFPATHWAY	0.625243	0	969	15	3	12
REACTOME_RIG_I_MDA5_MEDIATED_INDUCTION_OF_IFN_ALPHA_BETA_PATHWAYS	PID_MTOR_4PATHWAY	0.830958	0	694	55	5	50
REACTOME_RIP_MEDIATED_NFKB_ACTIVATION_VIA_DAI	PID_BETACATENIN_NUC_PATHWAY	0.77437	0	604	6	0	6
REACTOME_RNA_POL_III_CHAIN_ELONGATION	REACTOME_SIGNALING_BY_ROBO_RECEPTOR	0.79661	0	773	0	0	0
REACTOME_RNA_POL_III_TRANSCRIPTION_INITIATION_FROM_TYPE_2_PROMOTER	BIOCARTA_MET_PATHWAY	0.738147	0	856	0	0	0
REACTOME_RNA_POL_III_TRANSCRIPTION_INITIATION_FROM_TYPE_2_PROMOTER	KEGG_LONG_TERM_POTENTIATION	0.76925	0	856	1	0	1
REACTOME_RNA_POL_III_TRANSCRIPTION_INITIATION_FROM_TYPE_2_PROMOTER	KEGG_WNT_SIGNALING_PATHWAY	0.646237	0	856	2	0	2
REACTOME_RNA_POL_III_TRANSCRIPTION_INITIATION_FROM_TYPE_2_PROMOTER	REACTOME_SEMAPHORIN_INTERACTIONS	0.662531	0	856	1	0	1
REACTOME_RNA_POL_III_TRANSCRIPTION_INITIATION_FROM_TYPE_3_PROMOTER	KEGG_CHEMOKINE_SIGNALING_PATHWAY	0.66696	0	832	4	0	4
REACTOME_RNA_POL_III_TRANSCRIPTION_INITIATION_FROM_TYPE_3_PROMOTER	PID_MET_PATHWAY	0.62389	0	832	3	0	3
REACTOME_RNA_POL_II_PRE_TRANSCRIPTION_EVENTS	KEGG_AXON_GUIDANCE	0.620191	0	788	23	1	22
REACTOME_RNA_POL_II_PRE_TRANSCRIPTION_EVENTS	KEGG_WNT_SIGNALING_PATHWAY	0.679716	0	788	46	3	43
REACTOME_RNA_POL_II_PRE_TRANSCRIPTION_EVENTS	PID_PDGFRBPATHWAY	0.61382	0	788	48	0	48
REACTOME_RNA_POL_II_PRE_TRANSCRIPTION_EVENTS	PID_RET_PATHWAY	0.871648	0	788	18	0	18
REACTOME_RNA_POL_II_PRE_TRANSCRIPTION_EVENTS	REACTOME_NGF_SIGNALLING_VIA_TRKA_FROM_THE_PLASMA_MEMBRANE	0.602189	0	788	36	0	36
REACTOME_RNA_POL_II_PRE_TRANSCRIPTION_EVENTS	REACTOME_SIGNALING_BY_ERBB2	0.635281	0	788	36	0	36
REACTOME_RNA_POL_II_PRE_TRANSCRIPTION_EVENTS	REACTOME_TRANS_GOLGI_NETWORK_VESICLE_BUDDING	0.675159	0	788	24	0	24
REACTOME_RNA_POL_II_TRANSCRIPTION	PID_PDGFRBPATHWAY	0.628855	0	708	128	6	122
REACTOME_RNA_POL_II_TRANSCRIPTION	PID_RET_PATHWAY	0.837178	0	708	51	2	49
REACTOME_RNA_POL_II_TRANSCRIPTION_PRE_INITIATION_AND_PROMOTER_OPENING	KEGG_AXON_GUIDANCE	0.628438	0	754	7	1	6
REACTOME_RNA_POL_II_TRANSCRIPTION_PRE_INITIATION_AND_PROMOTER_OPENING	PID_MTOR_4PATHWAY	0.693697	0	754	11	0	11
REACTOME_RNA_POL_II_TRANSCRIPTION_PRE_INITIATION_AND_PROMOTER_OPENING	PID_PDGFRBPATHWAY	0.652127	0	754	18	0	18
REACTOME_RNA_POL_II_TRANSCRIPTION_PRE_INITIATION_AND_PROMOTER_OPENING	PID_VEGFR1_2_PATHWAY	0.66522	0	754	9	0	9
REACTOME_RNA_POL_I_PROMOTER_OPENING	KEGG_GLIOMA	0.623985	0	1176	1	0	1
REACTOME_RNA_POL_I_PROMOTER_OPENING	KEGG_LONG_TERM_POTENTIATION	0.627311	0	1176	3	0	3
REACTOME_RNA_POL_I_PROMOTER_OPENING	KEGG_OOCYTE_MEIOSIS	0.601717	0	1176	5	0	5
REACTOME_RNA_POL_I_PROMOTER_OPENING	PID_MTOR_4PATHWAY	0.668846	0	1176	5	0	5
REACTOME_RNA_POL_I_PROMOTER_OPENING	PID_SMAD2_3NUCLEARPATHWAY	0.657279	0	1176	7	0	7
REACTOME_RNA_POL_I_RNA_POL_III_AND_MITOCHONDRIAL_TRANSCRIPTION	KEGG_AXON_GUIDANCE	0.601491	0	753	20	0	20
REACTOME_RNA_POL_I_RNA_POL_III_AND_MITOCHONDRIAL_TRANSCRIPTION	KEGG_WNT_SIGNALING_PATHWAY	0.79566	0	753	28	1	27
REACTOME_RNA_POL_I_RNA_POL_III_AND_MITOCHONDRIAL_TRANSCRIPTION	PID_MTOR_4PATHWAY	0.700302	0	753	21	1	20
REACTOME_RNA_POL_I_TRANSCRIPTION	KEGG_AXON_GUIDANCE	0.677566	0	1026	12	0	12
REACTOME_RNA_POL_I_TRANSCRIPTION	KEGG_OOCYTE_MEIOSIS	0.638244	0	1026	9	1	8
REACTOME_RNA_POL_I_TRANSCRIPTION	KEGG_TIGHT_JUNCTION	0.741805	0	1026	12	1	11
REACTOME_RNA_POL_I_TRANSCRIPTION	KEGG_WNT_SIGNALING_PATHWAY	0.656432	0	1026	12	1	11
REACTOME_ROLE_OF_DCC_IN_REGULATING_APOPTOSIS	KEGG_REGULATION_OF_ACTIN_CYTOSKELETON	0.657027	0	646	25	5	20
REACTOME_ROLE_OF_DCC_IN_REGULATING_APOPTOSIS	KEGG_UBIQUITIN_MEDIATED_PROTEOLYSIS	0.671761	0	646	23	9	14
REACTOME_RORA_ACTIVATES_CIRCADIAN_EXPRESSION	KEGG_NEUROTROPHIN_SIGNALING_PATHWAY	0.665973	0	572	69	13	56
REACTOME_RORA_ACTIVATES_CIRCADIAN_EXPRESSION	KEGG_REGULATION_OF_ACTIN_CYTOSKELETON	0.624477	0	572	110	19	91
REACTOME_RORA_ACTIVATES_CIRCADIAN_EXPRESSION	KEGG_UBIQUITIN_MEDIATED_PROTEOLYSIS	0.699398	0	572	116	20	96
REACTOME_RORA_ACTIVATES_CIRCADIAN_EXPRESSION	PID_ECADHERIN_NASCENTAJ_PATHWAY	0.820404	0	572	26	0	26
REACTOME_RORA_ACTIVATES_CIRCADIAN_EXPRESSION	PID_PDGFRBPATHWAY	0.695277	0	572	100	11	89
REACTOME_SEMA3A_PAK_DEPENDENT_AXON_REPULSION	REACTOME_SIGNALING_BY_BMP	0.839986	0	1188	7	1	6
REACTOME_SEMA4D_IN_SEMAPHORIN_SIGNALING	KEGG_UBIQUITIN_MEDIATED_PROTEOLYSIS	0.628231	0	1070	34	12	22
REACTOME_SHC_MEDIATED_CASCADE	KEGG_UBIQUITIN_MEDIATED_PROTEOLYSIS	0.75162	0	646	36	6	30
REACTOME_SHC_MEDIATED_CASCADE	PID_ERBB1_INTERNALIZATION_PATHWAY	0.744792	0	646	12	2	10
REACTOME_SIGNALING_BY_CONSTITUTIVELY_ACTIVE_EGFR	KEGG_UBIQUITIN_MEDIATED_PROTEOLYSIS	0.614018	0	569	67	13	54
REACTOME_SIGNALING_BY_CONSTITUTIVELY_ACTIVE_EGFR	PID_CMYB_PATHWAY	0.751976	0	569	43	1	42
REACTOME_SIGNALING_BY_CONSTITUTIVELY_ACTIVE_EGFR	REACTOME_NGF_SIGNALLING_VIA_TRKA_FROM_THE_PLASMA_MEMBRANE	0.674785	0	569	51	9	42
REACTOME_SIGNALING_BY_CONSTITUTIVELY_ACTIVE_EGFR	REACTOME_SIGNALLING_BY_NGF	0.652087	0	569	74	11	63
REACTOME_SIGNALING_BY_EGFR_IN_CANCER	KEGG_UBIQUITIN_MEDIATED_PROTEOLYSIS	0.648509	0	561	255	55	200
REACTOME_SIGNALING_BY_ERBB4	KEGG_UBIQUITIN_MEDIATED_PROTEOLYSIS	0.673195	0	597	169	40	129
REACTOME_SIGNALING_BY_FGFR	KEGG_UBIQUITIN_MEDIATED_PROTEOLYSIS	0.701352	0	572	206	48	158
REACTOME_SIGNALING_BY_FGFR1_FUSION_MUTANTS	REACTOME_SIGNALING_BY_RHO_GTPASES	0.674477	0	615	27	2	25
REACTOME_SIGNALING_BY_FGFR1_MUTANTS	REACTOME_SIGNALING_BY_RHO_GTPASES	0.674477	0	615	27	2	25
REACTOME_SIGNALING_BY_FGFR_IN_DISEASE	KEGG_UBIQUITIN_MEDIATED_PROTEOLYSIS	0.723181	0	570	236	48	188
REACTOME_SIGNALING_BY_FGFR_IN_DISEASE	KEGG_WNT_SIGNALING_PATHWAY	0.725734	0	570	204	29	175
REACTOME_SIGNALING_BY_FGFR_MUTANTS	PID_ERBB1_INTERNALIZATION_PATHWAY	0.865636	0	545	27	3	24
REACTOME_SIGNALING_BY_GPCR	KEGG_UBIQUITIN_MEDIATED_PROTEOLYSIS	0.764109	0	633	302	50	252
REACTOME_SIGNALING_BY_HIPPO	PID_CMYB_PATHWAY	0.762176	0	635	36	2	34
REACTOME_SIGNALING_BY_HIPPO	PID_ERBB1_DOWNSTREAM_PATHWAY	0.736305	0	635	64	11	53
REACTOME_SIGNALING_BY_INSULIN_RECEPTOR	PID_MET_PATHWAY	0.674213	0	600	154	18	136
REACTOME_SIGNALING_BY_NODAL	PID_CMYB_PATHWAY	0.685165	0	609	26	1	25
REACTOME_SIGNALING_BY_NOTCH	KEGG_UBIQUITIN_MEDIATED_PROTEOLYSIS	0.629831	0	569	186	13	173
REACTOME_SIGNALING_BY_PDGF	REACTOME_SIGNALING_BY_TGF_BETA_RECEPTOR_COMPLEX	0.853311	0	560	132	14	118
REACTOME_SIGNALING_BY_RHO_GTPASES	KEGG_MAPK_SIGNALING_PATHWAY	0.663794	0	914	203	22	181
REACTOME_SIGNALING_BY_RHO_GTPASES	KEGG_UBIQUITIN_MEDIATED_PROTEOLYSIS	0.702574	0	914	168	30	138
REACTOME_SIGNALING_BY_RHO_GTPASES	PID_ERBB1_INTERNALIZATION_PATHWAY	0.797986	0	914	82	9	73
REACTOME_SIGNALING_BY_TGF_BETA_RECEPTOR_COMPLEX	KEGG_UBIQUITIN_MEDIATED_PROTEOLYSIS	0.686996	0	594	235	24	211
REACTOME_SIGNALING_BY_THE_B_CELL_RECEPTOR_BCR	KEGG_UBIQUITIN_MEDIATED_PROTEOLYSIS	0.700424	0	785	163	41	122
REACTOME_SIGNALING_BY_WNT	KEGG_ACUTE_MYELOID_LEUKEMIA	0.880018	0	982	24	1	23
REACTOME_SIGNALING_BY_WNT	KEGG_INSULIN_SIGNALING_PATHWAY	0.644532	0	982	46	3	43
REACTOME_SIGNALING_BY_WNT	KEGG_PATHWAYS_IN_CANCER	0.604271	0	982	84	6	78
REACTOME_SIGNALING_BY_WNT	PID_MTOR_4PATHWAY	0.714143	0	982	33	3	30
REACTOME_SIGNALLING_TO_ERKS	KEGG_UBIQUITIN_MEDIATED_PROTEOLYSIS	0.618582	0	639	78	18	60
REACTOME_SIGNALLING_TO_P38_VIA_RIT_AND_RIN	KEGG_ENDOCYTOSIS	0.77324	0	585	55	5	50
REACTOME_SIGNALLING_TO_RAS	KEGG_ENDOCYTOSIS	0.706375	0	614	72	9	63
REACTOME_SIGNALLING_TO_RAS	KEGG_UBIQUITIN_MEDIATED_PROTEOLYSIS	0.651945	0	614	63	17	46
REACTOME_SIGNAL_AMPLIFICATION	KEGG_UBIQUITIN_MEDIATED_PROTEOLYSIS	0.666257	0	534	42	2	40
REACTOME_SMAD2_SMAD3_SMAD4_HETEROTRIMER_REGULATES_TRANSCRIPTION	PID_MTOR_4PATHWAY	0.875991	0	596	44	3	41
REACTOME_SOS_MEDIATED_SIGNALLING	KEGG_NEUROTROPHIN_SIGNALING_PATHWAY	0.623727	0	607	27	4	23
REACTOME_SOS_MEDIATED_SIGNALLING	KEGG_UBIQUITIN_MEDIATED_PROTEOLYSIS	0.659969	0	607	61	17	44
REACTOME_SPHINGOLIPID_METABOLISM	KEGG_UBIQUITIN_MEDIATED_PROTEOLYSIS	0.622749	0	711	30	5	25
REACTOME_SRP_DEPENDENT_COTRANSLATIONAL_PROTEIN_TARGETING_TO_MEMBRANE	KEGG_INSULIN_SIGNALING_PATHWAY	0.667726	0	703	23	0	23
REACTOME_SRP_DEPENDENT_COTRANSLATIONAL_PROTEIN_TARGETING_TO_MEMBRANE	PID_ERBB1_DOWNSTREAM_PATHWAY	0.691383	0	703	34	1	33
REACTOME_SRP_DEPENDENT_COTRANSLATIONAL_PROTEIN_TARGETING_TO_MEMBRANE	PID_P38_MK2PATHWAY	0.940183	0	703	6	0	6
REACTOME_SRP_DEPENDENT_COTRANSLATIONAL_PROTEIN_TARGETING_TO_MEMBRANE	REACTOME_SIGNALING_BY_FGFR	0.636913	0	703	18	0	18
REACTOME_SYNTHESIS_OF_DNA	BIOCARTA_TCR_PATHWAY	0.857129	0	1078	6	1	5
REACTOME_SYNTHESIS_OF_DNA	PID_LKB1_PATHWAY	0.908126	0	1078	10	0	10
REACTOME_SYNTHESIS_OF_DNA	PID_MTOR_4PATHWAY	0.671976	0	1078	10	0	10
REACTOME_SYNTHESIS_OF_DNA	ST_PHOSPHOINOSITIDE_3_KINASE_PATHWAY	0.756547	0	1078	4	1	3
REACTOME_SYNTHESIS_OF_PA	PID_ECADHERIN_NASCENTAJ_PATHWAY	0.68842	0	1169	7	1	6
REACTOME_SYNTHESIS_OF_PA	PID_EPHBFWDPATHWAY	0.661776	0	1169	7	0	7
REACTOME_SYNTHESIS_OF_PE	BIOCARTA_MET_PATHWAY	0.846306	0	614	11	2	9
REACTOME_SYNTHESIS_OF_PE	KEGG_FOCAL_ADHESION	0.609317	0	614	23	3	20
REACTOME_SYNTHESIS_OF_PE	KEGG_NEUROTROPHIN_SIGNALING_PATHWAY	0.672499	0	614	21	4	17
REACTOME_SYNTHESIS_OF_PE	KEGG_PATHWAYS_IN_CANCER	0.611691	0	614	44	4	40
REACTOME_SYNTHESIS_OF_PE	KEGG_RENAL_CELL_CARCINOMA	0.759972	0	614	16	2	14
REACTOME_SYNTHESIS_OF_PE	KEGG_T_CELL_RECEPTOR_SIGNALING_PATHWAY	0.779844	0	614	16	3	13
REACTOME_SYNTHESIS_OF_PE	PID_CXCR4_PATHWAY	0.657135	0	614	17	1	16
REACTOME_SYNTHESIS_OF_PE	PID_MET_PATHWAY	0.7801	0	614	29	3	26
REACTOME_SYNTHESIS_OF_PE	PID_PDGFRBPATHWAY	0.714618	0	614	28	4	24
REACTOME_SYNTHESIS_OF_PE	PID_RET_PATHWAY	0.819624	0	614	12	2	10
REACTOME_SYNTHESIS_OF_PE	REACTOME_NGF_SIGNALLING_VIA_TRKA_FROM_THE_PLASMA_MEMBRANE	0.606074	0	614	22	2	20
REACTOME_SYNTHESIS_OF_PIPS_AT_THE_EARLY_ENDOSOME_MEMBRANE	KEGG_ADHERENS_JUNCTION	0.851715	0	690	38	5	33
REACTOME_SYNTHESIS_OF_PIPS_AT_THE_EARLY_ENDOSOME_MEMBRANE	KEGG_MAPK_SIGNALING_PATHWAY	0.625883	0	690	52	9	43
REACTOME_SYNTHESIS_OF_PIPS_AT_THE_EARLY_ENDOSOME_MEMBRANE	KEGG_UBIQUITIN_MEDIATED_PROTEOLYSIS	0.73978	0	690	54	21	33
REACTOME_SYNTHESIS_OF_PIPS_AT_THE_EARLY_ENDOSOME_MEMBRANE	PID_PI3KCIPATHWAY	0.80188	0	690	20	2	18
REACTOME_SYNTHESIS_OF_PIPS_AT_THE_GOLGI_MEMBRANE	KEGG_UBIQUITIN_MEDIATED_PROTEOLYSIS	0.708349	0	618	70	33	37
REACTOME_SYNTHESIS_OF_PIPS_AT_THE_LATE_ENDOSOME_MEMBRANE	KEGG_MAPK_SIGNALING_PATHWAY	0.657344	0	711	47	9	38
REACTOME_SYNTHESIS_OF_PIPS_AT_THE_LATE_ENDOSOME_MEMBRANE	KEGG_UBIQUITIN_MEDIATED_PROTEOLYSIS	0.792324	0	711	48	21	27
REACTOME_SYNTHESIS_OF_PIPS_AT_THE_PLASMA_MEMBRANE	BIOCARTA_MAPK_PATHWAY	0.8079	0	673	44	7	37
REACTOME_SYNTHESIS_OF_PIPS_AT_THE_PLASMA_MEMBRANE	KEGG_MAPK_SIGNALING_PATHWAY	0.657644	0	673	69	8	61
REACTOME_SYNTHESIS_OF_PIPS_AT_THE_PLASMA_MEMBRANE	KEGG_UBIQUITIN_MEDIATED_PROTEOLYSIS	0.701999	0	673	60	15	45
REACTOME_SYNTHESIS_OF_PIPS_AT_THE_PLASMA_MEMBRANE	PID_ERBB1_DOWNSTREAM_PATHWAY	0.663387	0	673	56	9	47
REACTOME_SYNTHESIS_SECRETION_AND_INACTIVATION_OF_GLP1	KEGG_INSULIN_SIGNALING_PATHWAY	0.632132	0	1003	5	0	5
REACTOME_SYNTHESIS_SECRETION_AND_INACTIVATION_OF_GLP1	KEGG_MELANOGENESIS	0.742115	0	1003	4	0	4
REACTOME_SYNTHESIS_SECRETION_AND_INACTIVATION_OF_GLP1	PID_ERBB1_DOWNSTREAM_PATHWAY	0.621872	0	1003	6	0	6
REACTOME_S_PHASE	PID_IGF1_PATHWAY	0.799611	0	1113	3	1	2
REACTOME_TAK1_ACTIVATES_NFKB_BY_PHOSPHORYLATION_AND_ACTIVATION_OF_IKKS_COMPLEX	PID_LKB1_PATHWAY	0.920019	0	593	21	0	21
REACTOME_TCR_SIGNALING	KEGG_WNT_SIGNALING_PATHWAY	0.869471	0	554	76	2	74
REACTOME_TCR_SIGNALING	PID_MTOR_4PATHWAY	0.801623	0	554	58	4	54
REACTOME_TETRAHYDROBIOPTERIN_BH4_SYNTHESIS_RECYCLING_SALVAGE_AND_REGULATION	KEGG_CHRONIC_MYELOID_LEUKEMIA	0.653378	0	1415	5	1	4
REACTOME_TETRAHYDROBIOPTERIN_BH4_SYNTHESIS_RECYCLING_SALVAGE_AND_REGULATION	PID_ERBB1_INTERNALIZATION_PATHWAY	0.701028	0	1415	3	0	3
REACTOME_TETRAHYDROBIOPTERIN_BH4_SYNTHESIS_RECYCLING_SALVAGE_AND_REGULATION	PID_INSULIN_PATHWAY	0.62543	0	1415	3	1	2
REACTOME_TGF_BETA_RECEPTOR_SIGNALING_ACTIVATES_SMADS	KEGG_UBIQUITIN_MEDIATED_PROTEOLYSIS	0.675614	0	727	100	4	96
REACTOME_THE_NLRP3_INFLAMMASOME	REACTOME_SIGNALING_BY_RHO_GTPASES	0.655992	0	913	2	0	2
REACTOME_THE_NLRP3_INFLAMMASOME	REACTOME_SIGNALING_BY_SCF_KIT	0.668848	0	913	3	0	3
REACTOME_THROMBIN_SIGNALLING_THROUGH_PROTEINASE_ACTIVATED_RECEPTORS_PARS	KEGG_UBIQUITIN_MEDIATED_PROTEOLYSIS	0.735702	0	544	51	10	41
REACTOME_THROMBOXANE_SIGNALLING_THROUGH_TP_RECEPTOR	KEGG_UBIQUITIN_MEDIATED_PROTEOLYSIS	0.748093	0	495	27	1	26
REACTOME_TIE2_SIGNALING	KEGG_UBIQUITIN_MEDIATED_PROTEOLYSIS	0.632582	0	600	41	6	35
REACTOME_TIE2_SIGNALING	PID_ERBB1_INTERNALIZATION_PATHWAY	0.752375	0	600	12	2	10
REACTOME_TIE2_SIGNALING	PID_SMAD2_3NUCLEARPATHWAY	0.761649	0	600	33	2	31
REACTOME_TRAF3_DEPENDENT_IRF_ACTIVATION_PATHWAY	KEGG_NEUROTROPHIN_SIGNALING_PATHWAY	0.643901	0	598	15	3	12
REACTOME_TRAF3_DEPENDENT_IRF_ACTIVATION_PATHWAY	KEGG_RENAL_CELL_CARCINOMA	0.69478	0	598	10	3	7
REACTOME_TRAF3_DEPENDENT_IRF_ACTIVATION_PATHWAY	PID_MET_PATHWAY	0.675913	0	598	20	3	17
REACTOME_TRAF3_DEPENDENT_IRF_ACTIVATION_PATHWAY	PID_MTOR_4PATHWAY	0.657148	0	598	14	2	12
REACTOME_TRAF6_MEDIATED_INDUCTION_OF_TAK1_COMPLEX	KEGG_FC_GAMMA_R_MEDIATED_PHAGOCYTOSIS	0.724802	0	538	20	0	20
REACTOME_TRAF6_MEDIATED_INDUCTION_OF_TAK1_COMPLEX	KEGG_REGULATION_OF_ACTIN_CYTOSKELETON	0.679964	0	538	40	1	39
REACTOME_TRAF6_MEDIATED_INDUCTION_OF_TAK1_COMPLEX	KEGG_RENAL_CELL_CARCINOMA	0.725634	0	538	21	0	21
REACTOME_TRAF6_MEDIATED_INDUCTION_OF_TAK1_COMPLEX	PID_MET_PATHWAY	0.723424	0	538	34	2	32
REACTOME_TRAF6_MEDIATED_INDUCTION_OF_TAK1_COMPLEX	PID_PDGFRBPATHWAY	0.623765	0	538	41	1	40
REACTOME_TRAF6_MEDIATED_INDUCTION_OF_TAK1_COMPLEX	PID_RET_PATHWAY	0.872253	0	538	15	0	15
REACTOME_TRAF6_MEDIATED_IRF7_ACTIVATION_IN_TLR7_8_OR_9_SIGNALING	KEGG_OOCYTE_MEIOSIS	0.617423	0	666	2	0	2
REACTOME_TRAF6_MEDIATED_IRF7_ACTIVATION_IN_TLR7_8_OR_9_SIGNALING	REACTOME_SIGNALING_BY_FGFR	0.65254	0	666	1	0	1
REACTOME_TRAF6_MEDIATED_IRF7_ACTIVATION_IN_TLR7_8_OR_9_SIGNALING	REACTOME_SIGNALLING_BY_NGF	0.629252	0	666	2	0	2
REACTOME_TRAF6_MEDIATED_NFKB_ACTIVATION	PID_FAK_PATHWAY	0.60769	0	662	8	0	8
REACTOME_TRANSCRIPTION	KEGG_CHEMOKINE_SIGNALING_PATHWAY	0.607345	0	685	94	3	91
REACTOME_TRANSCRIPTIONAL_ACTIVITY_OF_SMAD2_SMAD3_SMAD4_HETEROTRIMER	PID_MTOR_4PATHWAY	0.752017	0	585	77	9	68
REACTOME_TRANSCRIPTIONAL_ACTIVITY_OF_SMAD2_SMAD3_SMAD4_HETEROTRIMER	PID_NFAT_3PATHWAY	0.747497	0	585	46	5	41
REACTOME_TRANSCRIPTIONAL_REGULATION_OF_WHITE_ADIPOCYTE_DIFFERENTIATION	KEGG_OOCYTE_MEIOSIS	0.664556	0	570	66	5	61
REACTOME_TRANSCRIPTIONAL_REGULATION_OF_WHITE_ADIPOCYTE_DIFFERENTIATION	PID_MET_PATHWAY	0.718142	0	570	129	7	122
REACTOME_TRANSCRIPTION_COUPLED_NER_TC_NER	BIOCARTA_CHREBP2_PATHWAY	0.70754	0	823	1	0	1
REACTOME_TRANSCRIPTION_COUPLED_NER_TC_NER	REACTOME_SIGNALING_BY_ERBB2	0.702181	0	823	6	0	6
REACTOME_TRANSCRIPTION_COUPLED_NER_TC_NER	REACTOME_SIGNALING_BY_FGFR	0.659197	0	823	7	0	7
REACTOME_TRANSFERRIN_ENDOCYTOSIS_AND_RECYCLING	KEGG_REGULATION_OF_ACTIN_CYTOSKELETON	0.640226	0	842	22	2	20
REACTOME_TRANSFERRIN_ENDOCYTOSIS_AND_RECYCLING	KEGG_UBIQUITIN_MEDIATED_PROTEOLYSIS	0.618271	0	842	20	2	18
REACTOME_TRANSFERRIN_ENDOCYTOSIS_AND_RECYCLING	PID_HIF1_TFPATHWAY	0.708448	0	842	5	0	5
REACTOME_TRANSFERRIN_ENDOCYTOSIS_AND_RECYCLING	PID_VEGFR1_2_PATHWAY	0.671736	0	842	11	3	8
REACTOME_TRANSLATION	PID_MTOR_4PATHWAY	0.813202	0	758	46	4	42
REACTOME_TRANSLATION	PID_P38_MK2PATHWAY	0.915114	0	758	8	1	7
REACTOME_TRANSLATION	PID_PI3KPLCTRKPATHWAY	0.760375	0	758	16	2	14
REACTOME_TRANSMEMBRANE_TRANSPORT_OF_SMALL_MOLECULES	PID_MTOR_4PATHWAY	0.747257	0	514	205	19	186
REACTOME_TRANSMEMBRANE_TRANSPORT_OF_SMALL_MOLECULES	PID_P38_MK2PATHWAY	0.966896	0	514	31	4	27
REACTOME_TRANSMISSION_ACROSS_CHEMICAL_SYNAPSES	KEGG_REGULATION_OF_ACTIN_CYTOSKELETON	0.735857	0	579	175	15	160
REACTOME_TRANSPORT_OF_GLUCOSE_AND_OTHER_SUGARS_BILE_SALTS_AND_ORGANIC_ACIDS_METAL_IONS_AND_AMINE_COMPOUNDS	KEGG_OOCYTE_MEIOSIS	0.665606	0	591	24	6	18
REACTOME_TRANSPORT_OF_GLUCOSE_AND_OTHER_SUGARS_BILE_SALTS_AND_ORGANIC_ACIDS_METAL_IONS_AND_AMINE_COMPOUNDS	REACTOME_SIGNALING_BY_RHO_GTPASES	0.692739	0	591	29	0	29
REACTOME_TRANSPORT_OF_INORGANIC_CATIONS_ANIONS_AND_AMINO_ACIDS_OLIGOPEPTIDES	PID_MTOR_4PATHWAY	0.730137	0	592	39	1	38
REACTOME_TRANSPORT_OF_INORGANIC_CATIONS_ANIONS_AND_AMINO_ACIDS_OLIGOPEPTIDES	REACTOME_SIGNALING_BY_RHO_GTPASES	0.649787	0	592	43	1	42
REACTOME_TRANSPORT_OF_MATURE_MRNA_DERIVED_FROM_AN_INTRONLESS_TRANSCRIPT	KEGG_NEUROTROPHIN_SIGNALING_PATHWAY	0.613641	0	694	54	10	44
REACTOME_TRANSPORT_OF_MATURE_MRNA_DERIVED_FROM_AN_INTRONLESS_TRANSCRIPT	KEGG_RENAL_CELL_CARCINOMA	0.727486	0	694	42	13	29
REACTOME_TRANSPORT_OF_MATURE_MRNA_DERIVED_FROM_AN_INTRONLESS_TRANSCRIPT	PID_PDGFRBPATHWAY	0.617072	0	694	78	14	64
REACTOME_TRANSPORT_OF_MATURE_TRANSCRIPT_TO_CYTOPLASM	KEGG_WNT_SIGNALING_PATHWAY	0.616869	0	691	87	4	83
REACTOME_TRANSPORT_OF_MATURE_TRANSCRIPT_TO_CYTOPLASM	PID_NFAT_3PATHWAY	0.785788	0	691	39	6	33
REACTOME_TRANSPORT_OF_RIBONUCLEOPROTEINS_INTO_THE_HOST_NUCLEUS	KEGG_FOCAL_ADHESION	0.60689	0	650	62	15	47
REACTOME_TRANSPORT_OF_RIBONUCLEOPROTEINS_INTO_THE_HOST_NUCLEUS	KEGG_NEUROTROPHIN_SIGNALING_PATHWAY	0.611218	0	650	53	10	43
REACTOME_TRANSPORT_OF_VITAMINS_NUCLEOSIDES_AND_RELATED_MOLECULES	KEGG_WNT_SIGNALING_PATHWAY	0.864776	0	545	17	0	17
REACTOME_TRANSPORT_OF_VITAMINS_NUCLEOSIDES_AND_RELATED_MOLECULES	PID_MTOR_4PATHWAY	0.844832	0	545	11	0	11
REACTOME_TRANSPORT_TO_THE_GOLGI_AND_SUBSEQUENT_MODIFICATION	KEGG_ENDOCYTOSIS	0.688833	0	561	62	1	61
REACTOME_TRANS_GOLGI_NETWORK_VESICLE_BUDDING	KEGG_MAPK_SIGNALING_PATHWAY	0.623876	0	796	186	17	169
REACTOME_TRANS_GOLGI_NETWORK_VESICLE_BUDDING	KEGG_UBIQUITIN_MEDIATED_PROTEOLYSIS	0.635735	0	796	177	36	141
REACTOME_TRNA_AMINOACYLATION	BIOCARTA_TCR_PATHWAY	0.889017	0	870	6	0	6
REACTOME_TRNA_AMINOACYLATION	KEGG_AXON_GUIDANCE	0.654245	0	870	13	0	13
REACTOME_TRNA_AMINOACYLATION	KEGG_REGULATION_OF_ACTIN_CYTOSKELETON	0.628359	0	870	28	0	28
REACTOME_TRNA_AMINOACYLATION	KEGG_T_CELL_RECEPTOR_SIGNALING_PATHWAY	0.769911	0	870	13	0	13
REACTOME_TRNA_AMINOACYLATION	PID_RHOA_PATHWAY	0.673836	0	870	9	0	9
REACTOME_VEGF_LIGAND_RECEPTOR_INTERACTIONS	KEGG_CHRONIC_MYELOID_LEUKEMIA	0.629689	0	1346	9	2	7
REACTOME_VEGF_LIGAND_RECEPTOR_INTERACTIONS	KEGG_T_CELL_RECEPTOR_SIGNALING_PATHWAY	0.624597	0	1346	5	0	5
REACTOME_VIF_MEDIATED_DEGRADATION_OF_APOBEC3G	PID_INSULIN_PATHWAY	0.672293	0	1700	2	3	-1
REACTOME_VIF_MEDIATED_DEGRADATION_OF_APOBEC3G	PID_KITPATHWAY	0.65797	0	1700	9	2	7
REACTOME_VIF_MEDIATED_DEGRADATION_OF_APOBEC3G	PID_P53REGULATIONPATHWAY	0.610324	0	1700	9	2	7
REACTOME_VIRAL_MESSENGER_RNA_SYNTHESIS	KEGG_WNT_SIGNALING_PATHWAY	0.688624	0	744	4	0	4
REACTOME_VITAMIN_B5_PANTOTHENATE_METABOLISM	REACTOME_GOLGI_ASSOCIATED_VESICLE_BIOGENESIS	0.774634	0	630	10	4	6
REACTOME_VITAMIN_B5_PANTOTHENATE_METABOLISM	REACTOME_MEMBRANE_TRAFFICKING	0.73141	0	630	19	4	15
REACTOME_VITAMIN_B5_PANTOTHENATE_METABOLISM	REACTOME_TRANS_GOLGI_NETWORK_VESICLE_BUDDING	0.744796	0	630	10	4	6
REACTOME_YAP1_AND_WWTR1_TAZ_STIMULATED_GENE_EXPRESSION	KEGG_FC_GAMMA_R_MEDIATED_PHAGOCYTOSIS	0.844382	0	632	52	3	49
REACTOME_YAP1_AND_WWTR1_TAZ_STIMULATED_GENE_EXPRESSION	KEGG_REGULATION_OF_ACTIN_CYTOSKELETON	0.710686	0	632	106	8	98
REACTOME_YAP1_AND_WWTR1_TAZ_STIMULATED_GENE_EXPRESSION	KEGG_UBIQUITIN_MEDIATED_PROTEOLYSIS	0.679257	0	632	101	12	89
REACTOME_YAP1_AND_WWTR1_TAZ_STIMULATED_GENE_EXPRESSION	PID_CMYB_PATHWAY	0.796154	0	632	55	2	53
REACTOME_YAP1_AND_WWTR1_TAZ_STIMULATED_GENE_EXPRESSION	PID_PDGFRBPATHWAY	0.632346	0	632	97	7	90
REACTOME_YAP1_AND_WWTR1_TAZ_STIMULATED_GENE_EXPRESSION	PID_PI3KCIPATHWAY	0.867323	0	632	30	1	29
SA_B_CELL_RECEPTOR_COMPLEXES	KEGG_REGULATION_OF_ACTIN_CYTOSKELETON	0.634463	0	675	60	7	53
SA_B_CELL_RECEPTOR_COMPLEXES	KEGG_TGF_BETA_SIGNALING_PATHWAY	0.789477	0	675	31	4	27
SA_CASPASE_CASCADE	KEGG_OOCYTE_MEIOSIS	0.647944	0	646	20	7	13
SA_CASPASE_CASCADE	KEGG_UBIQUITIN_MEDIATED_PROTEOLYSIS	0.661506	0	646	46	13	33
SA_CASPASE_CASCADE	KEGG_WNT_SIGNALING_PATHWAY	0.634538	0	646	32	7	25
SA_G1_AND_S_PHASES	KEGG_PATHWAYS_IN_CANCER	0.607456	0	889	10	0	10
SA_G2_AND_M_PHASES	PID_NFAT_3PATHWAY	0.681903	0	1264	2	0	2
SA_PROGRAMMED_CELL_DEATH	KEGG_NEUROTROPHIN_SIGNALING_PATHWAY	0.650922	0	616	18	3	15
SA_PROGRAMMED_CELL_DEATH	KEGG_UBIQUITIN_MEDIATED_PROTEOLYSIS	0.685007	0	616	38	6	32
SA_PROGRAMMED_CELL_DEATH	PID_MET_PATHWAY	0.603005	0	616	31	3	28
SA_PROGRAMMED_CELL_DEATH	PID_NCADHERINPATHWAY	0.890899	0	616	7	2	5
SA_PROGRAMMED_CELL_DEATH	REACTOME_NGF_SIGNALLING_VIA_TRKA_FROM_THE_PLASMA_MEMBRANE	0.623979	0	616	26	4	22
SIG_BCR_SIGNALING_PATHWAY	KEGG_ENDOCYTOSIS	0.801843	0	580	100	9	91
SIG_BCR_SIGNALING_PATHWAY	KEGG_REGULATION_OF_ACTIN_CYTOSKELETON	0.644973	0	580	111	9	102
SIG_BCR_SIGNALING_PATHWAY	PID_SMAD2_3NUCLEARPATHWAY	0.827053	0	580	66	4	62
SIG_BCR_SIGNALING_PATHWAY	PID_TGFBRPATHWAY	0.917563	0	580	51	6	45
SIG_CD40PATHWAYMAP	KEGG_ENDOCYTOSIS	0.782652	0	549	40	4	36
SIG_CD40PATHWAYMAP	KEGG_TGF_BETA_SIGNALING_PATHWAY	0.756607	0	549	27	1	26
SIG_CD40PATHWAYMAP	PID_TGFBRPATHWAY	0.739918	0	549	25	2	23
SIG_CHEMOTAXIS	KEGG_OOCYTE_MEIOSIS	0.680797	0	757	41	7	34
SIG_CHEMOTAXIS	KEGG_UBIQUITIN_MEDIATED_PROTEOLYSIS	0.758877	0	757	73	13	60
SIG_IL4RECEPTOR_IN_B_LYPHOCYTES	KEGG_PATHWAYS_IN_CANCER	0.729284	0	671	97	10	87
SIG_IL4RECEPTOR_IN_B_LYPHOCYTES	PID_CMYB_PATHWAY	0.728918	0	671	45	1	44
SIG_INSULIN_RECEPTOR_PATHWAY_IN_CARDIAC_MYOCYTES	KEGG_UBIQUITIN_MEDIATED_PROTEOLYSIS	0.71838	0	717	112	25	87
SIG_INSULIN_RECEPTOR_PATHWAY_IN_CARDIAC_MYOCYTES	PID_CMYB_PATHWAY	0.782115	0	717	71	3	68
SIG_PIP3_SIGNALING_IN_B_LYMPHOCYTES	PID_CMYB_PATHWAY	0.71093	0	754	28	0	28
SIG_PIP3_SIGNALING_IN_B_LYMPHOCYTES	PID_SMAD2_3NUCLEARPATHWAY	0.752309	0	754	39	1	38
SIG_PIP3_SIGNALING_IN_CARDIAC_MYOCTES	KEGG_UBIQUITIN_MEDIATED_PROTEOLYSIS	0.764659	0	687	117	19	98
SIG_PIP3_SIGNALING_IN_CARDIAC_MYOCTES	PID_CMYB_PATHWAY	0.769586	0	687	70	3	67
SIG_PIP3_SIGNALING_IN_CARDIAC_MYOCTES	PID_ERBB1_INTERNALIZATION_PATHWAY	0.908188	0	687	63	6	57
SIG_REGULATION_OF_THE_ACTIN_CYTOSKELETON_BY_RHO_GTPASES	KEGG_NEUROTROPHIN_SIGNALING_PATHWAY	0.621394	0	885	43	4	39
SIG_REGULATION_OF_THE_ACTIN_CYTOSKELETON_BY_RHO_GTPASES	KEGG_T_CELL_RECEPTOR_SIGNALING_PATHWAY	0.696663	0	885	36	9	27
SIG_REGULATION_OF_THE_ACTIN_CYTOSKELETON_BY_RHO_GTPASES	PID_FAK_PATHWAY	0.717372	0	885	41	4	37
SIG_REGULATION_OF_THE_ACTIN_CYTOSKELETON_BY_RHO_GTPASES	PID_TGFBRPATHWAY	0.765483	0	885	40	8	32
ST_ADRENERGIC	KEGG_ENDOCYTOSIS	0.720936	0	599	80	11	69
ST_DIFFERENTIATION_PATHWAY_IN_PC12_CELLS	PID_ECADHERIN_NASCENTAJ_PATHWAY	0.866291	0	614	38	2	36
ST_DIFFERENTIATION_PATHWAY_IN_PC12_CELLS	PID_MET_PATHWAY	0.771399	0	614	97	22	75
ST_DIFFERENTIATION_PATHWAY_IN_PC12_CELLS	PID_PDGFRBPATHWAY	0.616895	0	614	108	17	91
ST_FAS_SIGNALING_PATHWAY	KEGG_OOCYTE_MEIOSIS	0.624161	0	611	54	8	46
ST_FAS_SIGNALING_PATHWAY	KEGG_UBIQUITIN_MEDIATED_PROTEOLYSIS	0.730069	0	611	107	21	86
ST_GA12_PATHWAY	PID_PDGFRBPATHWAY	0.643642	0	702	35	4	31
ST_GA13_PATHWAY	KEGG_AXON_GUIDANCE	0.630695	0	698	49	6	43
ST_GRANULE_CELL_SURVIVAL_PATHWAY	PID_PDGFRBPATHWAY	0.620703	0	566	87	12	75
ST_G_ALPHA_I_PATHWAY	KEGG_ENDOCYTOSIS	0.798976	0	629	89	8	81
ST_G_ALPHA_I_PATHWAY	KEGG_UBIQUITIN_MEDIATED_PROTEOLYSIS	0.680654	0	629	64	13	51
ST_G_ALPHA_S_PATHWAY	PID_EPHBFWDPATHWAY	0.86918	0	622	21	3	18
ST_JNK_MAPK_PATHWAY	KEGG_RENAL_CELL_CARCINOMA	0.642003	0	738	51	12	39
ST_JNK_MAPK_PATHWAY	PID_MTOR_4PATHWAY	0.618705	0	738	78	14	64
ST_JNK_MAPK_PATHWAY	PID_PI3KCIPATHWAY	0.6682	0	738	37	2	35
ST_JNK_MAPK_PATHWAY	PID_TRKRPATHWAY	0.75118	0	738	63	10	53
ST_PHOSPHOINOSITIDE_3_KINASE_PATHWAY	PID_CMYB_PATHWAY	0.66151	0	1079	38	1	37
ST_TUMOR_NECROSIS_FACTOR_PATHWAY	KEGG_REGULATION_OF_ACTIN_CYTOSKELETON	0.640339	0	682	64	10	54
ST_TUMOR_NECROSIS_FACTOR_PATHWAY	KEGG_UBIQUITIN_MEDIATED_PROTEOLYSIS	0.766996	0	682	45	6	39
ST_T_CELL_SIGNAL_TRANSDUCTION	KEGG_UBIQUITIN_MEDIATED_PROTEOLYSIS	0.631924	0	675	85	21	64
ST_WNT_BETA_CATENIN_PATHWAY	KEGG_LONG_TERM_DEPRESSION	0.790626	0	621	17	1	16
ST_WNT_BETA_CATENIN_PATHWAY	KEGG_UBIQUITIN_MEDIATED_PROTEOLYSIS	0.793005	0	621	52	5	47
WNT_SIGNALING	KEGG_NEUROTROPHIN_SIGNALING_PATHWAY	0.608857	0	556	97	9	88
WNT_SIGNALING	REACTOME_SIGNALLING_BY_NGF	0.694464	0	556	151	20	131

## Sheet: Lost cePathways
P	Q	ES	P value	len(list)	numCeRNA_normal	numCeRNA_tumor	ceRNA number difference (normal vs. tumor)
BIOCARTA_ACTINY_PATHWAY	PID_ER_NONGENOMIC_PATHWAY	0.700094	0	1923	26	3	23
BIOCARTA_AGPCR_PATHWAY	PID_NETRIN_PATHWAY	0.6165	0	2183	7	0	7
BIOCARTA_ARENRF2_PATHWAY	PID_NCADHERINPATHWAY	0.644915	0	1785	10	5	5
BIOCARTA_BARRESTIN_SRC_PATHWAY	PID_NCADHERINPATHWAY	0.656527	0	1981	13	2	11
BIOCARTA_CACAM_PATHWAY	KEGG_ADHERENS_JUNCTION	0.70328	0	1204	19	4	15
BIOCARTA_CACAM_PATHWAY	REACTOME_SIGNALING_BY_HIPPO	0.700654	0	1204	9	2	7
BIOCARTA_CACAM_PATHWAY	REACTOME_SIGNALING_BY_TGF_BETA_RECEPTOR_COMPLEX	0.625349	0	1204	23	4	19
BIOCARTA_CALCINEURIN_PATHWAY	PID_EPHBFWDPATHWAY	0.601763	0	1916	27	1	26
BIOCARTA_CALCINEURIN_PATHWAY	PID_KITPATHWAY	0.615989	0	1916	34	3	31
BIOCARTA_CARM1_PATHWAY	BIOCARTA_PTDINS_PATHWAY	0.621276	0	2153	23	4	19
BIOCARTA_CARM_ER_PATHWAY	BIOCARTA_PTDINS_PATHWAY	0.655432	0	2018	17	1	16
BIOCARTA_CARM_ER_PATHWAY	PID_NCADHERINPATHWAY	0.770851	0	2018	16	3	13
BIOCARTA_CARM_ER_PATHWAY	PID_TRKRPATHWAY	0.606369	0	2018	32	5	27
BIOCARTA_CARM_ER_PATHWAY	REACTOME_NETRIN1_SIGNALING	0.622742	0	2018	19	2	17
BIOCARTA_CASPASE_PATHWAY	PID_VEGFR1_PATHWAY	0.762564	0	1983	21	8	13
BIOCARTA_CDK5_PATHWAY	BIOCARTA_PGC1A_PATHWAY	0.820092	0	1709	4	0	4
BIOCARTA_CDK5_PATHWAY	KEGG_MELANOGENESIS	0.687133	0	1709	13	2	11
BIOCARTA_CDK5_PATHWAY	KEGG_OOCYTE_MEIOSIS	0.661096	0	1709	12	1	11
BIOCARTA_CHREBP2_PATHWAY	BIOCARTA_TGFB_PATHWAY	0.730481	0	1943	21	1	20
BIOCARTA_CHREBP2_PATHWAY	REACTOME_MYOGENESIS	0.765737	0	1943	19	0	19
BIOCARTA_CREB_PATHWAY	REACTOME_CTLA4_INHIBITORY_SIGNALING	0.662557	0	2141	16	1	15
BIOCARTA_CREB_PATHWAY	REACTOME_SIGNALING_BY_BMP	0.645951	0	2141	21	4	17
BIOCARTA_CSK_PATHWAY	PID_BMPPATHWAY	0.604683	0	2195	14	1	13
BIOCARTA_CSK_PATHWAY	PID_NETRIN_PATHWAY	0.668729	0	2195	7	0	7
BIOCARTA_CTL_PATHWAY	PID_PDGFRBPATHWAY	0.728421	0	394	0	0	0
BIOCARTA_CXCR4_PATHWAY	KEGG_MELANOGENESIS	0.670255	0	2081	28	2	26
BIOCARTA_DNAFRAGMENT_PATHWAY	PID_ERBB1_RECEPTOR_PROXIMAL_PATHWAY	0.622758	0	1405	8	0	8
BIOCARTA_DREAM_PATHWAY	BIOCARTA_PTDINS_PATHWAY	0.671212	0	2158	14	2	12
BIOCARTA_DREAM_PATHWAY	PID_VEGFR1_PATHWAY	0.611381	0	2158	16	4	12
BIOCARTA_EIF2_PATHWAY	KEGG_MELANOGENESIS	0.630357	0	1916	15	1	14
BIOCARTA_EIF4_PATHWAY	KEGG_MELANOGENESIS	0.610921	0	2027	43	5	38
BIOCARTA_EIF_PATHWAY	KEGG_ADHERENS_JUNCTION	0.604617	0	1574	23	1	22
BIOCARTA_EIF_PATHWAY	KEGG_GNRH_SIGNALING_PATHWAY	0.633392	0	1574	17	3	14
BIOCARTA_EIF_PATHWAY	KEGG_LONG_TERM_POTENTIATION	0.695776	0	1574	15	1	14
BIOCARTA_EIF_PATHWAY	KEGG_MELANOGENESIS	0.655384	0	1574	15	3	12
BIOCARTA_EIF_PATHWAY	PID_BETACATENIN_NUC_PATHWAY	0.624799	0	1574	12	2	10
BIOCARTA_EIF_PATHWAY	PID_CMYB_PATHWAY	0.664619	0	1574	11	0	11
BIOCARTA_EPHA4_PATHWAY	PID_PI3KCIAKTPATHWAY	0.768649	0	857	3	1	2
BIOCARTA_EPHA4_PATHWAY	PID_VEGFR1_PATHWAY	0.789708	0	857	9	0	9
BIOCARTA_EPHA4_PATHWAY	REACTOME_DOWNSTREAM_SIGNALING_OF_ACTIVATED_FGFR	0.609971	0	857	5	2	3
BIOCARTA_ERK5_PATHWAY	PID_CDC42_PATHWAY	0.663489	0	2067	43	7	36
BIOCARTA_GATA3_PATHWAY	PID_GLYPICAN_1PATHWAY	0.68075	0	1933	7	1	6
BIOCARTA_GLEEVEC_PATHWAY	BIOCARTA_PTDINS_PATHWAY	0.770639	0	2028	15	0	15
BIOCARTA_GPCR_PATHWAY	BIOCARTA_TGFB_PATHWAY	0.624784	0	2007	24	2	22
BIOCARTA_GPCR_PATHWAY	KEGG_COLORECTAL_CANCER	0.6011	0	2007	36	4	32
BIOCARTA_GPCR_PATHWAY	REACTOME_CTLA4_INHIBITORY_SIGNALING	0.708437	0	2007	15	1	14
BIOCARTA_IGF1MTOR_PATHWAY	BIOCARTA_PYK2_PATHWAY	0.639552	0	2100	24	1	23
BIOCARTA_IGF1R_PATHWAY	BIOCARTA_PTDINS_PATHWAY	0.742084	0	2179	17	2	15
BIOCARTA_IGF1R_PATHWAY	REACTOME_CTLA4_INHIBITORY_SIGNALING	0.679933	0	2179	16	1	15
BIOCARTA_IGF1_PATHWAY	KEGG_LONG_TERM_POTENTIATION	0.600094	0	2108	31	6	25
BIOCARTA_IGF1_PATHWAY	KEGG_MELANOGENESIS	0.630265	0	2108	33	3	30
BIOCARTA_IL22BP_PATHWAY	BIOCARTA_GCR_PATHWAY	0.799325	0	1296	2	0	2
BIOCARTA_IL2RB_PATHWAY	KEGG_MELANOGENESIS	0.66465	0	2035	56	7	49
BIOCARTA_IL3_PATHWAY	KEGG_LONG_TERM_DEPRESSION	0.675032	0	1367	2	0	2
BIOCARTA_IL3_PATHWAY	PID_TGFBRPATHWAY	0.645847	0	1367	6	3	3
BIOCARTA_IL3_PATHWAY	REACTOME_DOWNREGULATION_OF_TGF_BETA_RECEPTOR_SIGNALING	0.756728	0	1367	2	2	0
BIOCARTA_IL3_PATHWAY	REACTOME_OPIOID_SIGNALLING	0.742607	0	1367	5	1	4
BIOCARTA_IL3_PATHWAY	REACTOME_PLC_BETA_MEDIATED_EVENTS	0.847888	0	1367	2	0	2
BIOCARTA_IL4_PATHWAY	KEGG_GLIOMA	0.620531	0	1908	8	0	8
BIOCARTA_IL4_PATHWAY	KEGG_LONG_TERM_DEPRESSION	0.635619	0	1908	7	0	7
BIOCARTA_IL4_PATHWAY	PID_VEGFR1_PATHWAY	0.651827	0	1908	5	0	5
BIOCARTA_IL4_PATHWAY	REACTOME_PLC_BETA_MEDIATED_EVENTS	0.614936	0	1908	5	1	4
BIOCARTA_IL7_PATHWAY	PID_IGF1_PATHWAY	0.621373	0	1879	11	2	9
BIOCARTA_IL7_PATHWAY	REACTOME_CTLA4_INHIBITORY_SIGNALING	0.832113	0	1879	9	0	9
BIOCARTA_IL7_PATHWAY	REACTOME_DOWNREGULATION_OF_TGF_BETA_RECEPTOR_SIGNALING	0.681677	0	1879	9	1	8
BIOCARTA_IL7_PATHWAY	REACTOME_TGF_BETA_RECEPTOR_SIGNALING_ACTIVATES_SMADS	0.675954	0	1879	9	1	8
BIOCARTA_INSULIN_PATHWAY	KEGG_MELANOGENESIS	0.611339	0	1981	26	3	23
BIOCARTA_INTEGRIN_PATHWAY	PID_CMYB_PATHWAY	0.673562	0	1188	42	4	38
BIOCARTA_MCALPAIN_PATHWAY	PID_NCADHERINPATHWAY	0.628023	0	1927	16	2	14
BIOCARTA_MCALPAIN_PATHWAY	PID_P38_MKK3_6PATHWAY	0.745003	0	1927	10	0	10
BIOCARTA_MCM_PATHWAY	PID_PI3KCIPATHWAY	0.665905	0	1809	2	0	2
BIOCARTA_MEF2D_PATHWAY	KEGG_OOCYTE_MEIOSIS	0.600754	0	1122	12	1	11
BIOCARTA_MEF2D_PATHWAY	KEGG_WNT_SIGNALING_PATHWAY	0.623298	0	1122	20	0	20
BIOCARTA_MEF2D_PATHWAY	PID_INSULIN_PATHWAY	0.636295	0	1122	10	2	8
BIOCARTA_MEF2D_PATHWAY	PID_MYC_ACTIVPATHWAY	0.696903	0	1122	7	0	7
BIOCARTA_MEF2D_PATHWAY	PID_VEGFR1_PATHWAY	0.754077	0	1122	14	2	12
BIOCARTA_MEF2D_PATHWAY	REACTOME_GOLGI_ASSOCIATED_VESICLE_BIOGENESIS	0.701098	0	1122	9	0	9
BIOCARTA_MEF2D_PATHWAY	REACTOME_TRANS_GOLGI_NETWORK_VESICLE_BUDDING	0.635047	0	1122	10	0	10
BIOCARTA_MITOCHONDRIA_PATHWAY	PID_ER_NONGENOMIC_PATHWAY	0.678242	0	2055	22	3	19
BIOCARTA_MPR_PATHWAY	BIOCARTA_TCR_PATHWAY	0.63717	0	2130	8	1	7
BIOCARTA_MTA3_PATHWAY	KEGG_LONG_TERM_POTENTIATION	0.673512	0	1033	2	0	2
BIOCARTA_MTA3_PATHWAY	KEGG_OOCYTE_MEIOSIS	0.680378	0	1033	2	0	2
BIOCARTA_MTA3_PATHWAY	KEGG_UBIQUITIN_MEDIATED_PROTEOLYSIS	0.607099	0	1033	3	0	3
BIOCARTA_MYOSIN_PATHWAY	REACTOME_CTLA4_INHIBITORY_SIGNALING	0.749736	0	2101	18	1	17
BIOCARTA_NDKDYNAMIN_PATHWAY	PID_AJDISS_2PATHWAY	0.605698	0	1183	10	0	10
BIOCARTA_NDKDYNAMIN_PATHWAY	PID_CMYB_PATHWAY	0.618871	0	1183	14	0	14
BIOCARTA_NDKDYNAMIN_PATHWAY	PID_MTOR_4PATHWAY	0.68756	0	1183	17	2	15
BIOCARTA_NDKDYNAMIN_PATHWAY	PID_P53REGULATIONPATHWAY	0.854774	0	1183	13	1	12
BIOCARTA_NDKDYNAMIN_PATHWAY	REACTOME_SIGNALING_BY_HIPPO	0.73926	0	1183	9	1	8
BIOCARTA_NKCELLS_PATHWAY	PID_CMYB_PATHWAY	0.657358	0	1211	9	0	9
BIOCARTA_NKT_PATHWAY	PID_NCADHERINPATHWAY	0.642065	0	1061	1	0	1
BIOCARTA_NKT_PATHWAY	REACTOME_CTLA4_INHIBITORY_SIGNALING	0.80774	0	1061	1	0	1
BIOCARTA_NKT_PATHWAY	SIG_PIP3_SIGNALING_IN_CARDIAC_MYOCTES	0.660514	0	1061	0	0	0
BIOCARTA_NO1_PATHWAY	REACTOME_GOLGI_ASSOCIATED_VESICLE_BIOGENESIS	0.609895	0	1865	20	1	19
BIOCARTA_PAR1_PATHWAY	REACTOME_CIRCADIAN_CLOCK	0.611528	0	2009	41	3	38
BIOCARTA_PARKIN_PATHWAY	KEGG_MELANOGENESIS	0.764414	0	909	5	1	4
BIOCARTA_PARKIN_PATHWAY	REACTOME_DOWNSTREAM_SIGNALING_OF_ACTIVATED_FGFR	0.609064	0	909	3	1	2
BIOCARTA_PARKIN_PATHWAY	REACTOME_SIGNALING_BY_FGFR_IN_DISEASE	0.623721	0	909	3	1	2
BIOCARTA_PARKIN_PATHWAY	REACTOME_TRANSMISSION_ACROSS_CHEMICAL_SYNAPSES	0.728212	0	909	5	1	4
BIOCARTA_PGC1A_PATHWAY	PID_PI3KCIAKTPATHWAY	0.635904	0	1310	9	3	6
BIOCARTA_PGC1A_PATHWAY	REACTOME_SIGNALING_BY_INSULIN_RECEPTOR	0.61133	0	1310	20	1	19
BIOCARTA_PML_PATHWAY	PID_RB_1PATHWAY	0.614169	0	1715	8	0	8
BIOCARTA_PPARA_PATHWAY	BIOCARTA_PTDINS_PATHWAY	0.634139	0	2143	37	5	32
BIOCARTA_PPARA_PATHWAY	KEGG_MELANOGENESIS	0.608786	0	2143	75	9	66
BIOCARTA_PROTEASOME_PATHWAY	KEGG_CHRONIC_MYELOID_LEUKEMIA	0.664659	0	804	6	0	6
BIOCARTA_PROTEASOME_PATHWAY	KEGG_NEUROTROPHIN_SIGNALING_PATHWAY	0.632811	0	804	10	0	10
BIOCARTA_PROTEASOME_PATHWAY	PID_CDC42_PATHWAY	0.823845	0	804	11	0	11
BIOCARTA_PROTEASOME_PATHWAY	PID_ERBB1_DOWNSTREAM_PATHWAY	0.690532	0	804	11	0	11
BIOCARTA_PROTEASOME_PATHWAY	PID_PDGFRBPATHWAY	0.669187	0	804	8	0	8
BIOCARTA_PS1_PATHWAY	BIOCARTA_CHREBP2_PATHWAY	0.711572	0	2002	10	2	8
BIOCARTA_PS1_PATHWAY	REACTOME_NETRIN1_SIGNALING	0.702636	0	2002	10	1	9
BIOCARTA_PYK2_PATHWAY	SIG_INSULIN_RECEPTOR_PATHWAY_IN_CARDIAC_MYOCYTES	0.620427	0	1971	36	4	32
BIOCARTA_RAB_PATHWAY	BIOCARTA_CHREBP2_PATHWAY	0.636563	0	1854	9	0	9
BIOCARTA_RAB_PATHWAY	REACTOME_CD28_CO_STIMULATION	0.630763	0	1854	9	0	9
BIOCARTA_RAB_PATHWAY	REACTOME_OPIOID_SIGNALLING	0.623133	0	1854	19	1	18
BIOCARTA_RANMS_PATHWAY	BIOCARTA_MET_PATHWAY	0.750734	0	1605	1	0	1
BIOCARTA_RANMS_PATHWAY	PID_ER_NONGENOMIC_PATHWAY	0.658677	0	1605	3	0	3
BIOCARTA_RB_PATHWAY	PID_AR_TF_PATHWAY	0.709528	0	1623	10	0	10
BIOCARTA_RHO_PATHWAY	KEGG_VASOPRESSIN_REGULATED_WATER_REABSORPTION	0.625934	0	1778	22	2	20
BIOCARTA_RHO_PATHWAY	PID_AJDISS_2PATHWAY	0.604107	0	1778	27	0	27
BIOCARTA_RHO_PATHWAY	PID_PDGFRAPATHWAY	0.888652	0	1778	13	1	12
BIOCARTA_SARS_PATHWAY	REACTOME_NEUROTRANSMITTER_RECEPTOR_BINDING_AND_DOWNSTREAM_TRANSMISSION_IN_THE_POSTSYNAPTIC_CELL	0.646222	0	908	7	2	5
BIOCARTA_SET_PATHWAY	PID_AJDISS_2PATHWAY	0.680862	0	1421	8	0	8
BIOCARTA_SKP2E2F_PATHWAY	PID_HNF3APATHWAY	0.725212	0	1225	3	0	3
BIOCARTA_SODD_PATHWAY	REACTOME_DOWNREGULATION_OF_TGF_BETA_RECEPTOR_SIGNALING	0.701731	0	1750	1	0	1
BIOCARTA_SODD_PATHWAY	REACTOME_TGF_BETA_RECEPTOR_SIGNALING_ACTIVATES_SMADS	0.727428	0	1750	1	0	1
BIOCARTA_SPPA_PATHWAY	PID_IGF1_PATHWAY	0.620195	0	1984	17	2	15
BIOCARTA_SPPA_PATHWAY	SIG_INSULIN_RECEPTOR_PATHWAY_IN_CARDIAC_MYOCYTES	0.654754	0	1984	16	1	15
BIOCARTA_SPRY_PATHWAY	KEGG_MELANOGENESIS	0.602668	0	2006	36	4	32
BIOCARTA_SPRY_PATHWAY	PID_PI3KCIPATHWAY	0.672205	0	2006	18	2	16
BIOCARTA_SRCRPTP_PATHWAY	PID_ECADHERIN_NASCENTAJ_PATHWAY	0.617088	0	1733	4	0	4
BIOCARTA_SRCRPTP_PATHWAY	PID_NOTCH_PATHWAY	0.620656	0	1733	4	0	4
BIOCARTA_STATHMIN_PATHWAY	REACTOME_DOWNREGULATION_OF_SMAD2_3_SMAD4_TRANSCRIPTIONAL_ACTIVITY	0.622191	0	2099	7	0	7
BIOCARTA_TGFB_PATHWAY	KEGG_MELANOGENESIS	0.610277	0	2002	52	3	49
BIOCARTA_TH1TH2_PATHWAY	KEGG_NEUROTROPHIN_SIGNALING_PATHWAY	0.605433	0	317	2	0	2
BIOCARTA_TH1TH2_PATHWAY	PID_PDGFRBPATHWAY	0.705891	0	317	3	0	3
BIOCARTA_TNFR1_PATHWAY	BIOCARTA_PTDINS_PATHWAY	0.627006	0	2096	20	1	19
BIOCARTA_TNFR1_PATHWAY	PID_VEGFR1_PATHWAY	0.671975	0	2096	34	0	34
BIOCARTA_TPO_PATHWAY	KEGG_MELANOGENESIS	0.644166	0	2099	32	0	32
BIOCARTA_UCALPAIN_PATHWAY	KEGG_CHRONIC_MYELOID_LEUKEMIA	0.669475	0	920	9	0	9
BIOCARTA_UCALPAIN_PATHWAY	KEGG_ENDOMETRIAL_CANCER	0.707867	0	920	2	0	2
BIOCARTA_UCALPAIN_PATHWAY	PID_CDC42_PATHWAY	0.751451	0	920	11	0	11
BIOCARTA_UCALPAIN_PATHWAY	PID_HIF1_TFPATHWAY	0.75923	0	920	6	0	6
BIOCARTA_UCALPAIN_PATHWAY	PID_RAC1_PATHWAY	0.807601	0	920	6	0	6
BIOCARTA_VDR_PATHWAY	BIOCARTA_PTDINS_PATHWAY	0.669961	0	2078	26	4	22
BIOCARTA_VEGF_PATHWAY	KEGG_LONG_TERM_POTENTIATION	0.624578	0	1958	14	0	14
BIOCARTA_WNT_PATHWAY	BIOCARTA_TCR_PATHWAY	0.60598	0	2068	22	0	22
BIOCARTA_WNT_PATHWAY	PID_ECADHERIN_NASCENTAJ_PATHWAY	0.616013	0	2068	27	0	27
KEGG_ABC_TRANSPORTERS	KEGG_TIGHT_JUNCTION	0.709995	0	1016	8	0	8
KEGG_ADIPOCYTOKINE_SIGNALING_PATHWAY	PID_AR_PATHWAY	0.668847	0	1506	27	2	25
KEGG_ADIPOCYTOKINE_SIGNALING_PATHWAY	REACTOME_SEMA3A_PAK_DEPENDENT_AXON_REPULSION	0.729846	0	1506	10	0	10
KEGG_ALANINE_ASPARTATE_AND_GLUTAMATE_METABOLISM	KEGG_MELANOGENESIS	0.627238	0	1806	9	0	9
KEGG_ALZHEIMERS_DISEASE	KEGG_VASOPRESSIN_REGULATED_WATER_REABSORPTION	0.620764	0	1650	47	2	45
KEGG_ALZHEIMERS_DISEASE	PID_CDC42_PATHWAY	0.698453	0	1650	94	7	87
KEGG_AMINO_SUGAR_AND_NUCLEOTIDE_SUGAR_METABOLISM	BIOCARTA_PTDINS_PATHWAY	0.709539	0	1596	2	0	2
KEGG_AMINO_SUGAR_AND_NUCLEOTIDE_SUGAR_METABOLISM	KEGG_LONG_TERM_DEPRESSION	0.692311	0	1596	5	0	5
KEGG_AMINO_SUGAR_AND_NUCLEOTIDE_SUGAR_METABOLISM	KEGG_MELANOGENESIS	0.633667	0	1596	5	0	5
KEGG_AMINO_SUGAR_AND_NUCLEOTIDE_SUGAR_METABOLISM	PID_ERBB1_RECEPTOR_PROXIMAL_PATHWAY	0.65618	0	1596	6	1	5
KEGG_AMINO_SUGAR_AND_NUCLEOTIDE_SUGAR_METABOLISM	PID_ER_NONGENOMIC_PATHWAY	0.667954	0	1596	5	1	4
KEGG_AMINO_SUGAR_AND_NUCLEOTIDE_SUGAR_METABOLISM	PID_IGF1_PATHWAY	0.693223	0	1596	2	0	2
KEGG_AMINO_SUGAR_AND_NUCLEOTIDE_SUGAR_METABOLISM	PID_IL2_1PATHWAY	0.601557	0	1596	5	0	5
KEGG_AMINO_SUGAR_AND_NUCLEOTIDE_SUGAR_METABOLISM	PID_IL6_7PATHWAY	0.637578	0	1596	6	0	6
KEGG_AMINO_SUGAR_AND_NUCLEOTIDE_SUGAR_METABOLISM	PID_INSULIN_PATHWAY	0.70768	0	1596	4	0	4
KEGG_AMINO_SUGAR_AND_NUCLEOTIDE_SUGAR_METABOLISM	PID_KITPATHWAY	0.725222	0	1596	5	0	5
KEGG_AMINO_SUGAR_AND_NUCLEOTIDE_SUGAR_METABOLISM	PID_PI3KCIPATHWAY	0.64541	0	1596	2	0	2
KEGG_AMINO_SUGAR_AND_NUCLEOTIDE_SUGAR_METABOLISM	PID_THROMBIN_PAR1_PATHWAY	0.645704	0	1596	5	0	5
KEGG_AMINO_SUGAR_AND_NUCLEOTIDE_SUGAR_METABOLISM	REACTOME_TRANSMISSION_ACROSS_CHEMICAL_SYNAPSES	0.60451	0	1596	4	0	4
KEGG_AMINO_SUGAR_AND_NUCLEOTIDE_SUGAR_METABOLISM	SIG_IL4RECEPTOR_IN_B_LYPHOCYTES	0.676801	0	1596	2	0	2
KEGG_AMYOTROPHIC_LATERAL_SCLEROSIS_ALS	REACTOME_DOWNREGULATION_OF_SMAD2_3_SMAD4_TRANSCRIPTIONAL_ACTIVITY	0.677419	0	1732	14	3	11
KEGG_ANTIGEN_PROCESSING_AND_PRESENTATION	BIOCARTA_ECM_PATHWAY	0.695895	0	1915	17	2	15
KEGG_ANTIGEN_PROCESSING_AND_PRESENTATION	PID_CDC42_PATHWAY	0.611414	0	1915	42	5	37
KEGG_ARRHYTHMOGENIC_RIGHT_VENTRICULAR_CARDIOMYOPATHY_ARVC	PID_AJDISS_2PATHWAY	0.736777	0	1674	15	0	15
KEGG_BASAL_TRANSCRIPTION_FACTORS	BIOCARTA_TCR_PATHWAY	0.672845	0	1721	3	0	3
KEGG_BUTANOATE_METABOLISM	KEGG_RENAL_CELL_CARCINOMA	0.724499	0	794	1	0	1
KEGG_CALCIUM_SIGNALING_PATHWAY	KEGG_FC_GAMMA_R_MEDIATED_PHAGOCYTOSIS	0.669091	0	1789	46	3	43
KEGG_CALCIUM_SIGNALING_PATHWAY	PID_IGF1_PATHWAY	0.658798	0	1789	30	3	27
KEGG_CALCIUM_SIGNALING_PATHWAY	PID_KITPATHWAY	0.645498	0	1789	44	3	41
KEGG_CALCIUM_SIGNALING_PATHWAY	SIG_INSULIN_RECEPTOR_PATHWAY_IN_CARDIAC_MYOCYTES	0.608934	0	1789	41	5	36
KEGG_CARDIAC_MUSCLE_CONTRACTION	KEGG_MELANOGENESIS	0.636872	0	863	5	0	5
KEGG_CELL_ADHESION_MOLECULES_CAMS	PID_KITPATHWAY	0.607191	0	2032	18	0	18
KEGG_CELL_ADHESION_MOLECULES_CAMS	PID_SMAD2_3PATHWAY	0.676498	0	2032	16	0	16
KEGG_CIRCADIAN_RHYTHM_MAMMAL	PID_ECADHERIN_NASCENTAJ_PATHWAY	0.612269	0	1838	14	0	14
KEGG_CYSTEINE_AND_METHIONINE_METABOLISM	KEGG_ADHERENS_JUNCTION	0.603207	0	1697	31	0	31
KEGG_CYSTEINE_AND_METHIONINE_METABOLISM	PID_NETRIN_PATHWAY	0.649866	0	1697	8	0	8
KEGG_DILATED_CARDIOMYOPATHY	KEGG_FC_GAMMA_R_MEDIATED_PHAGOCYTOSIS	0.601413	0	1348	20	0	20
KEGG_DILATED_CARDIOMYOPATHY	KEGG_INSULIN_SIGNALING_PATHWAY	0.701274	0	1348	30	2	28
KEGG_ECM_RECEPTOR_INTERACTION	PID_IGF1_PATHWAY	0.698081	0	1568	8	0	8
KEGG_ECM_RECEPTOR_INTERACTION	PID_INSULIN_PATHWAY	0.679957	0	1568	15	0	15
KEGG_ENDOCYTOSIS	KEGG_MELANOGENESIS	0.673984	0	2124	199	13	186
KEGG_ETHER_LIPID_METABOLISM	KEGG_COLORECTAL_CANCER	0.602295	0	1759	20	3	17
KEGG_FATTY_ACID_METABOLISM	PID_CMYB_PATHWAY	0.667063	0	1093	7	0	7
KEGG_GLUTATHIONE_METABOLISM	PID_AR_TF_PATHWAY	0.751899	0	1299	2	1	1
KEGG_GLUTATHIONE_METABOLISM	PID_BETACATENIN_NUC_PATHWAY	0.636804	0	1299	2	1	1
KEGG_GLUTATHIONE_METABOLISM	REACTOME_SIGNALING_BY_BMP	0.728327	0	1299	1	1	0
KEGG_GLUTATHIONE_METABOLISM	SIG_CHEMOTAXIS	0.683701	0	1299	4	0	4
KEGG_GLYCEROLIPID_METABOLISM	PID_ERBB1_RECEPTOR_PROXIMAL_PATHWAY	0.652398	0	1329	8	1	7
KEGG_GLYCEROLIPID_METABOLISM	PID_IGF1_PATHWAY	0.766309	0	1329	4	1	3
KEGG_GLYCEROLIPID_METABOLISM	PID_INSULIN_PATHWAY	0.760619	0	1329	6	2	4
KEGG_GLYCEROLIPID_METABOLISM	SIG_INSULIN_RECEPTOR_PATHWAY_IN_CARDIAC_MYOCYTES	0.726983	0	1329	7	2	5
KEGG_GLYCEROLIPID_METABOLISM	SIG_PIP3_SIGNALING_IN_CARDIAC_MYOCTES	0.72098	0	1329	6	1	5
KEGG_GLYCEROLIPID_METABOLISM	ST_PHOSPHOINOSITIDE_3_KINASE_PATHWAY	0.665003	0	1329	8	2	6
KEGG_GLYCEROPHOSPHOLIPID_METABOLISM	KEGG_MELANOGENESIS	0.673623	0	1958	44	1	43
KEGG_GLYCOLYSIS_GLUCONEOGENESIS	KEGG_AXON_GUIDANCE	0.663809	0	596	10	0	10
KEGG_GLYCOSAMINOGLYCAN_BIOSYNTHESIS_HEPARAN_SULFATE	REACTOME_DOWNREGULATION_OF_TGF_BETA_RECEPTOR_SIGNALING	0.659178	0	2024	6	0	6
KEGG_GLYCOSAMINOGLYCAN_BIOSYNTHESIS_HEPARAN_SULFATE	REACTOME_PLC_BETA_MEDIATED_EVENTS	0.709835	0	2024	7	1	6
KEGG_GLYCOSAMINOGLYCAN_BIOSYNTHESIS_HEPARAN_SULFATE	REACTOME_TGF_BETA_RECEPTOR_SIGNALING_ACTIVATES_SMADS	0.63227	0	2024	10	0	10
KEGG_GLYCOSPHINGOLIPID_BIOSYNTHESIS_GLOBO_SERIES	PID_HIF1_TFPATHWAY	0.674422	0	652	1	1	0
KEGG_GLYCOSPHINGOLIPID_BIOSYNTHESIS_GLOBO_SERIES	REACTOME_SIGNALING_BY_RHO_GTPASES	0.722497	0	652	1	1	0
KEGG_GLYCOSPHINGOLIPID_BIOSYNTHESIS_GLOBO_SERIES	REACTOME_SIGNALLING_BY_NGF	0.618884	0	652	2	1	1
KEGG_GLYCOSYLPHOSPHATIDYLINOSITOL_GPI_ANCHOR_BIOSYNTHESIS	PID_ERBB1_RECEPTOR_PROXIMAL_PATHWAY	0.609769	0	1430	8	0	8
KEGG_GLYOXYLATE_AND_DICARBOXYLATE_METABOLISM	PID_TRKRPATHWAY	0.799969	0	749	1	0	1
KEGG_GNRH_SIGNALING_PATHWAY	BIOCARTA_PTDINS_PATHWAY	0.652151	0	2089	46	5	41
KEGG_HEDGEHOG_SIGNALING_PATHWAY	BIOCARTA_PTDINS_PATHWAY	0.741457	0	2097	22	3	19
KEGG_HYPERTROPHIC_CARDIOMYOPATHY_HCM	BIOCARTA_AT1R_PATHWAY	0.770381	0	1155	18	0	18
KEGG_HYPERTROPHIC_CARDIOMYOPATHY_HCM	BIOCARTA_MAPK_PATHWAY	0.602801	0	1155	33	0	33
KEGG_HYPERTROPHIC_CARDIOMYOPATHY_HCM	KEGG_GNRH_SIGNALING_PATHWAY	0.641805	0	1155	26	0	26
KEGG_HYPERTROPHIC_CARDIOMYOPATHY_HCM	REACTOME_MYOGENESIS	0.895501	0	1155	17	1	16
KEGG_LONG_TERM_POTENTIATION	PID_CDC42_PATHWAY	0.608674	0	1851	104	11	93
KEGG_LONG_TERM_POTENTIATION	REACTOME_CTLA4_INHIBITORY_SIGNALING	0.735925	0	1851	35	2	33
KEGG_MELANOGENESIS	REACTOME_DOWNREGULATION_OF_TGF_BETA_RECEPTOR_SIGNALING	0.618092	0	2118	50	2	48
KEGG_NICOTINATE_AND_NICOTINAMIDE_METABOLISM	KEGG_ACUTE_MYELOID_LEUKEMIA	0.778742	0	776	0	0	0
KEGG_NICOTINATE_AND_NICOTINAMIDE_METABOLISM	KEGG_ERBB_SIGNALING_PATHWAY	0.65372	0	776	0	0	0
KEGG_NICOTINATE_AND_NICOTINAMIDE_METABOLISM	PID_ERBB1_DOWNSTREAM_PATHWAY	0.644601	0	776	3	0	3
KEGG_NICOTINATE_AND_NICOTINAMIDE_METABOLISM	REACTOME_PLATELET_ACTIVATION_SIGNALING_AND_AGGREGATION	0.601273	0	776	0	0	0
KEGG_NOTCH_SIGNALING_PATHWAY	BIOCARTA_PTDINS_PATHWAY	0.626934	0	2091	20	0	20
KEGG_NUCLEOTIDE_EXCISION_REPAIR	REACTOME_CIRCADIAN_CLOCK	0.668045	0	1444	7	0	7
KEGG_OLFACTORY_TRANSDUCTION	REACTOME_SIGNALING_BY_TGF_BETA_RECEPTOR_COMPLEX	0.613747	0	1125	6	0	6
KEGG_OLFACTORY_TRANSDUCTION	REACTOME_TRANSCRIPTIONAL_ACTIVITY_OF_SMAD2_SMAD3_SMAD4_HETEROTRIMER	0.742083	0	1125	3	0	3
KEGG_ONE_CARBON_POOL_BY_FOLATE	BIOCARTA_PYK2_PATHWAY	0.72327	0	1791	5	0	5
KEGG_ONE_CARBON_POOL_BY_FOLATE	KEGG_ADHERENS_JUNCTION	0.662151	0	1791	16	0	16
KEGG_ONE_CARBON_POOL_BY_FOLATE	KEGG_MELANOGENESIS	0.643699	0	1791	11	0	11
KEGG_PARKINSONS_DISEASE	KEGG_MELANOGENESIS	0.806787	0	719	18	3	15
KEGG_PARKINSONS_DISEASE	REACTOME_NGF_SIGNALLING_VIA_TRKA_FROM_THE_PLASMA_MEMBRANE	0.646928	0	719	15	6	9
KEGG_PEROXISOME	PID_BMPPATHWAY	0.603334	0	1577	13	0	13
KEGG_PORPHYRIN_AND_CHLOROPHYLL_METABOLISM	BIOCARTA_AT1R_PATHWAY	0.730569	0	1060	4	0	4
KEGG_PORPHYRIN_AND_CHLOROPHYLL_METABOLISM	BIOCARTA_PGC1A_PATHWAY	0.830065	0	1060	2	0	2
KEGG_PORPHYRIN_AND_CHLOROPHYLL_METABOLISM	KEGG_REGULATION_OF_ACTIN_CYTOSKELETON	0.645694	0	1060	11	0	11
KEGG_PORPHYRIN_AND_CHLOROPHYLL_METABOLISM	PID_RB_1PATHWAY	0.600781	0	1060	5	0	5
KEGG_PROGESTERONE_MEDIATED_OOCYTE_MATURATION	BIOCARTA_TGFB_PATHWAY	0.602675	0	2174	30	2	28
KEGG_PROTEASOME	KEGG_ADHERENS_JUNCTION	0.643031	0	1013	9	1	8
KEGG_PROTEASOME	PID_ECADHERIN_NASCENTAJ_PATHWAY	0.722703	0	1013	6	0	6
KEGG_PYRUVATE_METABOLISM	PID_SMAD2_3NUCLEARPATHWAY	0.660553	0	859	1	1	0
KEGG_RNA_DEGRADATION	BIOCARTA_CHREBP2_PATHWAY	0.665705	0	1967	37	3	34
KEGG_RNA_DEGRADATION	REACTOME_REGULATION_OF_KIT_SIGNALING	0.744362	0	1967	37	8	29
KEGG_SELENOAMINO_ACID_METABOLISM	PID_NETRIN_PATHWAY	0.624517	0	1952	6	0	6
KEGG_SMALL_CELL_LUNG_CANCER	BIOCARTA_ALK_PATHWAY	0.608395	0	2078	38	5	33
KEGG_SNARE_INTERACTIONS_IN_VESICULAR_TRANSPORT	BIOCARTA_GPCR_PATHWAY	0.727764	0	1919	10	0	10
KEGG_SPHINGOLIPID_METABOLISM	REACTOME_TGF_BETA_RECEPTOR_SIGNALING_ACTIVATES_SMADS	0.662402	0	1953	6	0	6
KEGG_STARCH_AND_SUCROSE_METABOLISM	BIOCARTA_AT1R_PATHWAY	0.628558	0	1596	2	0	2
KEGG_TASTE_TRANSDUCTION	PID_CDC42_PATHWAY	0.60127	0	2001	9	0	9
KEGG_TASTE_TRANSDUCTION	PID_ERBB1_RECEPTOR_PROXIMAL_PATHWAY	0.656902	0	2001	7	0	7
KEGG_TERPENOID_BACKBONE_BIOSYNTHESIS	KEGG_RENAL_CELL_CARCINOMA	0.672219	0	962	1	0	1
KEGG_TERPENOID_BACKBONE_BIOSYNTHESIS	PID_HIF1_TFPATHWAY	0.880443	0	962	1	0	1
KEGG_TERPENOID_BACKBONE_BIOSYNTHESIS	PID_SMAD2_3NUCLEARPATHWAY	0.629749	0	962	0	0	0
KEGG_TGF_BETA_SIGNALING_PATHWAY	KEGG_MELANOGENESIS	0.6845	0	2068	131	13	118
KEGG_TGF_BETA_SIGNALING_PATHWAY	PID_AJDISS_2PATHWAY	0.602123	0	2068	47	5	42
KEGG_THYROID_CANCER	PID_CDC42_PATHWAY	0.611825	0	2030	49	5	44
KEGG_TIGHT_JUNCTION	PID_IGF1_PATHWAY	0.655729	0	2008	69	3	66
KEGG_TYPE_II_DIABETES_MELLITUS	KEGG_MELANOGENESIS	0.601909	0	2121	24	2	22
KEGG_UBIQUITIN_MEDIATED_PROTEOLYSIS	PID_KITPATHWAY	0.645751	0	1944	158	28	130
KEGG_VALINE_LEUCINE_AND_ISOLEUCINE_BIOSYNTHESIS	PID_AR_PATHWAY	0.606157	0	1308	8	0	8
KEGG_VALINE_LEUCINE_AND_ISOLEUCINE_DEGRADATION	KEGG_ENDOCYTOSIS	0.610005	0	1487	16	2	14
KEGG_VALINE_LEUCINE_AND_ISOLEUCINE_DEGRADATION	PID_HIF1_TFPATHWAY	0.648394	0	1487	10	0	10
KEGG_VASOPRESSIN_REGULATED_WATER_REABSORPTION	PID_NETRIN_PATHWAY	0.658555	0	2123	31	2	29
KEGG_VIBRIO_CHOLERAE_INFECTION	BIOCARTA_TCR_PATHWAY	0.632872	0	2167	12	0	12
PID_ALK2PATHWAY	BIOCARTA_CHREBP2_PATHWAY	0.749276	0	1946	9	1	8
PID_ALK2PATHWAY	KEGG_LONG_TERM_DEPRESSION	0.646201	0	1946	20	3	17
PID_ALK2PATHWAY	KEGG_MELANOGENESIS	0.642438	0	1946	31	5	26
PID_AMB2_NEUTROPHILS_PATHWAY	KEGG_ACUTE_MYELOID_LEUKEMIA	0.624529	0	1056	15	1	14
PID_AMB2_NEUTROPHILS_PATHWAY	KEGG_MTOR_SIGNALING_PATHWAY	0.702125	0	1056	12	1	11
PID_AMB2_NEUTROPHILS_PATHWAY	KEGG_OOCYTE_MEIOSIS	0.661201	0	1056	26	1	25
PID_AMB2_NEUTROPHILS_PATHWAY	PID_HIF1_TFPATHWAY	0.730364	0	1056	14	4	10
PID_AMB2_NEUTROPHILS_PATHWAY	REACTOME_DOWNREGULATION_OF_SMAD2_3_SMAD4_TRANSCRIPTIONAL_ACTIVITY	0.828228	0	1056	11	1	10
PID_AMB2_NEUTROPHILS_PATHWAY	REACTOME_DOWNSTREAM_SIGNALING_OF_ACTIVATED_FGFR	0.633449	0	1056	23	5	18
PID_AMB2_NEUTROPHILS_PATHWAY	REACTOME_SIGNALING_BY_FGFR	0.652097	0	1056	26	6	20
PID_AMB2_NEUTROPHILS_PATHWAY	REACTOME_SIGNALING_BY_FGFR_IN_DISEASE	0.666069	0	1056	31	6	25
PID_AMB2_NEUTROPHILS_PATHWAY	REACTOME_SIGNALING_BY_TGF_BETA_RECEPTOR_COMPLEX	0.674678	0	1056	33	4	29
PID_AMB2_NEUTROPHILS_PATHWAY	REACTOME_TRANSCRIPTIONAL_ACTIVITY_OF_SMAD2_SMAD3_SMAD4_HETEROTRIMER	0.770166	0	1056	13	2	11
PID_AMB2_NEUTROPHILS_PATHWAY	SIG_PIP3_SIGNALING_IN_CARDIAC_MYOCTES	0.627347	0	1056	19	2	17
PID_AMB2_NEUTROPHILS_PATHWAY	ST_PHOSPHOINOSITIDE_3_KINASE_PATHWAY	0.728408	0	1056	11	2	9
PID_ANGIOPOIETINRECEPTOR_PATHWAY	REACTOME_SIGNALING_BY_ROBO_RECEPTOR	0.623812	0	2023	25	3	22
PID_ANTHRAXPATHWAY	BIOCARTA_PTDINS_PATHWAY	0.744053	0	1720	11	1	10
PID_ANTHRAXPATHWAY	PID_PI3KCIAKTPATHWAY	0.626264	0	1720	10	2	8
PID_AP1_PATHWAY	BIOCARTA_PTDINS_PATHWAY	0.620565	0	1997	29	3	26
PID_AP1_PATHWAY	PID_TRKRPATHWAY	0.626838	0	1997	59	9	50
PID_ARF6_PATHWAY	PID_INSULIN_PATHWAY	0.605492	0	1974	13	2	11
PID_ARF6_PATHWAY	PID_NCADHERINPATHWAY	0.606268	0	1974	8	0	8
PID_ARF6_TRAFFICKINGPATHWAY	PID_ER_NONGENOMIC_PATHWAY	0.629132	0	2018	36	2	34
PID_ARF_3PATHWAY	PID_AJDISS_2PATHWAY	0.667197	0	1530	6	0	6
PID_AR_PATHWAY	BIOCARTA_PTDINS_PATHWAY	0.612836	0	2100	39	4	35
PID_AR_PATHWAY	REACTOME_CTLA4_INHIBITORY_SIGNALING	0.667404	0	2100	32	2	30
PID_ATR_PATHWAY	PID_GLYPICAN_1PATHWAY	0.644054	0	1862	4	0	4
PID_AURORA_A_PATHWAY	BIOCARTA_ALK_PATHWAY	0.629836	0	1947	21	0	21
PID_AURORA_B_PATHWAY	PID_GLYPICAN_1PATHWAY	0.758023	0	1947	18	0	18
PID_BARD1PATHWAY	PID_AR_TF_PATHWAY	0.651836	0	1784	9	0	9
PID_BETACATENIN_DEG_PATHWAY	BIOCARTA_PYK2_PATHWAY	0.624871	0	1970	17	0	17
PID_BMPPATHWAY	PID_NCADHERINPATHWAY	0.625432	0	2108	34	11	23
PID_CD8TCRDOWNSTREAMPATHWAY	PID_KITPATHWAY	0.627254	0	1859	42	6	36
PID_CIRCADIANPATHWAY	PID_ECADHERIN_NASCENTAJ_PATHWAY	0.618457	0	1835	15	0	15
PID_CMYB_PATHWAY	PID_NCADHERINPATHWAY	0.616427	0	2094	38	3	35
PID_CXCR4_PATHWAY	PID_PI3KPLCTRKPATHWAY	0.610627	0	1977	86	15	71
PID_DNAPK_PATHWAY	REACTOME_MRNA_SPLICING	0.60893	0	1183	23	0	23
PID_ECADHERIN_NASCENTAJ_PATHWAY	REACTOME_DOWNREGULATION_OF_TGF_BETA_RECEPTOR_SIGNALING	0.670492	0	2017	38	1	37
PID_ECADHERIN_NASCENTAJ_PATHWAY	REACTOME_TGF_BETA_RECEPTOR_SIGNALING_ACTIVATES_SMADS	0.634204	0	2017	43	1	42
PID_ECADHERIN_STABILIZATION_PATHWAY	BIOCARTA_TCR_PATHWAY	0.693679	0	2143	30	2	28
PID_ECADHERIN_STABILIZATION_PATHWAY	PID_ERBB1_RECEPTOR_PROXIMAL_PATHWAY	0.657325	0	2143	62	5	57
PID_ECADHERIN_STABILIZATION_PATHWAY	PID_INSULIN_PATHWAY	0.6588	0	2143	35	7	28
PID_EPOPATHWAY	BIOCARTA_ALK_PATHWAY	0.624482	0	1784	38	6	32
PID_ERA_GENOMIC_PATHWAY	BIOCARTA_PTDINS_PATHWAY	0.654581	0	2115	35	4	31
PID_ERA_GENOMIC_PATHWAY	REACTOME_CTLA4_INHIBITORY_SIGNALING	0.681557	0	2115	28	1	27
PID_ERBB2ERBB3PATHWAY	REACTOME_TGF_BETA_RECEPTOR_SIGNALING_ACTIVATES_SMADS	0.620446	0	2044	32	3	29
PID_ERBB4_PATHWAY	KEGG_ADHERENS_JUNCTION	0.635351	0	2130	49	4	45
PID_ERBB4_PATHWAY	PID_CDC42_PATHWAY	0.603271	0	2130	46	6	40
PID_ERBB4_PATHWAY	REACTOME_TGF_BETA_RECEPTOR_SIGNALING_ACTIVATES_SMADS	0.659287	0	2130	29	2	27
PID_FRA_PATHWAY	KEGG_MELANOGENESIS	0.600246	0	2031	28	5	23
PID_HDAC_CLASSIII_PATHWAY	PID_KITPATHWAY	0.611821	0	1819	22	3	19
PID_HDAC_CLASSIII_PATHWAY	PID_PI3KCIPATHWAY	0.650633	0	1819	14	1	13
PID_HIF1APATHWAY	REACTOME_NEUROTRANSMITTER_RECEPTOR_BINDING_AND_DOWNSTREAM_TRANSMISSION_IN_THE_POSTSYNAPTIC_CELL	0.665833	0	1426	5	1	4
PID_HIF1_TFPATHWAY	REACTOME_NETRIN1_SIGNALING	0.613922	0	1828	29	3	26
PID_HIF2PATHWAY	KEGG_ADHERENS_JUNCTION	0.613053	0	1674	49	6	43
PID_HNF3BPATHWAY	BIOCARTA_AT1R_PATHWAY	0.678456	0	1835	19	1	18
PID_HNF3BPATHWAY	BIOCARTA_PYK2_PATHWAY	0.673682	0	1835	20	2	18
PID_HNF3BPATHWAY	REACTOME_MYOGENESIS	0.797463	0	1835	14	2	12
PID_IFNGPATHWAY	KEGG_MELANOGENESIS	0.623392	0	1865	67	13	54
PID_IL12_2PATHWAY	PID_NOTCH_PATHWAY	0.694542	0	1328	11	0	11
PID_IL23PATHWAY	PID_ECADHERIN_NASCENTAJ_PATHWAY	0.601639	0	1839	7	0	7
PID_IL27PATHWAY	KEGG_ADHERENS_JUNCTION	0.644006	0	1863	17	0	17
PID_IL27PATHWAY	PID_ECADHERIN_NASCENTAJ_PATHWAY	0.667869	0	1863	7	0	7
PID_IL27PATHWAY	PID_FGF_PATHWAY	0.621307	0	1863	8	0	8
PID_IL27PATHWAY	REACTOME_PLC_BETA_MEDIATED_EVENTS	0.633273	0	1863	7	0	7
PID_IL27PATHWAY	SIG_PIP3_SIGNALING_IN_CARDIAC_MYOCTES	0.611525	0	1863	8	0	8
PID_IL2_STAT5PATHWAY	BIOCARTA_PTDINS_PATHWAY	0.640649	0	2041	18	4	14
PID_IL3_PATHWAY	PID_ILK_PATHWAY	0.679244	0	1460	12	4	8
PID_IL3_PATHWAY	REACTOME_DOWNREGULATION_OF_TGF_BETA_RECEPTOR_SIGNALING	0.727146	0	1460	9	1	8
PID_IL3_PATHWAY	REACTOME_SIGNALING_BY_HIPPO	0.712307	0	1460	4	2	2
PID_IL3_PATHWAY	REACTOME_SIGNALING_BY_TGF_BETA_RECEPTOR_COMPLEX	0.636335	0	1460	14	4	10
PID_IL3_PATHWAY	REACTOME_TGF_BETA_RECEPTOR_SIGNALING_ACTIVATES_SMADS	0.73961	0	1460	9	1	8
PID_IL5_PATHWAY	PID_AR_PATHWAY	0.650558	0	1321	12	2	10
PID_IL6_7PATHWAY	REACTOME_DOWNREGULATION_OF_SMAD2_3_SMAD4_TRANSCRIPTIONAL_ACTIVITY	0.697899	0	1908	13	3	10
PID_IL8CXCR1_PATHWAY	ST_PHOSPHOINOSITIDE_3_KINASE_PATHWAY	0.660934	0	2107	15	1	14
PID_IL8CXCR2_PATHWAY	PID_IGF1_PATHWAY	0.677153	0	2007	17	4	13
PID_IL8CXCR2_PATHWAY	ST_PHOSPHOINOSITIDE_3_KINASE_PATHWAY	0.676474	0	2007	15	1	14
PID_INSULIN_GLUCOSE_PATHWAY	REACTOME_SEMA3A_PAK_DEPENDENT_AXON_REPULSION	0.963573	0	1256	10	0	10
PID_INSULIN_GLUCOSE_PATHWAY	REACTOME_TGF_BETA_RECEPTOR_SIGNALING_ACTIVATES_SMADS	0.714216	0	1256	13	2	11
PID_INTEGRIN1_PATHWAY	PID_FGF_PATHWAY	0.621563	0	1443	9	0	9
PID_INTEGRIN1_PATHWAY	PID_KITPATHWAY	0.659347	0	1443	11	0	11
PID_INTEGRIN_A9B1_PATHWAY	PID_ECADHERIN_NASCENTAJ_PATHWAY	0.659999	0	1485	6	0	6
PID_INTEGRIN_A9B1_PATHWAY	REACTOME_GOLGI_ASSOCIATED_VESICLE_BIOGENESIS	0.607791	0	1485	3	0	3
PID_INTEGRIN_A9B1_PATHWAY	REACTOME_TRANS_GOLGI_NETWORK_VESICLE_BUDDING	0.654907	0	1485	5	0	5
PID_KITPATHWAY	REACTOME_SIGNALING_BY_BMP	0.661179	0	2037	51	8	43
PID_LIS1PATHWAY	KEGG_ACUTE_MYELOID_LEUKEMIA	0.604864	0	1518	19	2	17
PID_LIS1PATHWAY	KEGG_PROSTATE_CANCER	0.628032	0	1518	32	3	29
PID_LIS1PATHWAY	PID_CMYB_PATHWAY	0.627586	0	1518	29	0	29
PID_LIS1PATHWAY	PID_PI3KPLCTRKPATHWAY	0.646809	0	1518	19	1	18
PID_LIS1PATHWAY	REACTOME_DOWNREGULATION_OF_SMAD2_3_SMAD4_TRANSCRIPTIONAL_ACTIVITY	0.698441	0	1518	14	0	14
PID_LIS1PATHWAY	REACTOME_TRANSCRIPTIONAL_ACTIVITY_OF_SMAD2_SMAD3_SMAD4_HETEROTRIMER	0.726331	0	1518	20	0	20
PID_LYMPHANGIOGENESIS_PATHWAY	KEGG_MELANOGENESIS	0.642196	0	1971	41	5	36
PID_MAPKTRKPATHWAY	KEGG_OOCYTE_MEIOSIS	0.649399	0	1654	43	12	31
PID_MYC_ACTIVPATHWAY	PID_CMYB_PATHWAY	0.601827	0	1931	71	3	68
PID_MYC_REPRESSPATHWAY	BIOCARTA_TCR_PATHWAY	0.615638	0	2052	39	1	38
PID_NOTCH_PATHWAY	REACTOME_NETRIN1_SIGNALING	0.630394	0	2120	46	2	44
PID_P38ALPHABETADOWNSTREAMPATHWAY	KEGG_MELANOGENESIS	0.604254	0	1977	40	5	35
PID_P38ALPHABETADOWNSTREAMPATHWAY	PID_CDC42_PATHWAY	0.617039	0	1977	52	7	45
PID_P38ALPHABETAPATHWAY	PID_ECADHERIN_NASCENTAJ_PATHWAY	0.607951	0	2003	21	0	21
PID_P38ALPHABETAPATHWAY	PID_IGF1_PATHWAY	0.721202	0	2003	21	1	20
PID_P38ALPHABETAPATHWAY	PID_INSULIN_PATHWAY	0.67634	0	2003	25	2	23
PID_P38ALPHABETAPATHWAY	PID_VEGFR1_PATHWAY	0.68627	0	2003	22	0	22
PID_P38ALPHABETAPATHWAY	SIG_INSULIN_RECEPTOR_PATHWAY_IN_CARDIAC_MYOCYTES	0.674575	0	2003	22	2	20
PID_P38GAMMADELTAPATHWAY	REACTOME_CIRCADIAN_CLOCK	0.772092	0	882	1	0	1
PID_PDGFRAPATHWAY	PID_PI3KPLCTRKPATHWAY	0.662905	0	1929	21	1	20
PID_PLK1_PATHWAY	KEGG_VASOPRESSIN_REGULATED_WATER_REABSORPTION	0.660507	0	1646	24	9	15
PID_PLK1_PATHWAY	PID_KITPATHWAY	0.697965	0	1646	45	15	30
PID_PRLSIGNALINGEVENTSPATHWAY	BIOCARTA_RAB_PATHWAY	0.752029	0	1109	7	1	6
PID_PRLSIGNALINGEVENTSPATHWAY	PID_AJDISS_2PATHWAY	0.609396	0	1109	13	0	13
PID_PTP1BPATHWAY	BIOCARTA_RAB_PATHWAY	0.790123	0	1946	4	0	4
PID_RANBP2PATHWAY	KEGG_P53_SIGNALING_PATHWAY	0.638396	0	1813	9	3	6
PID_RANBP2PATHWAY	REACTOME_OPIOID_SIGNALLING	0.660075	0	1813	11	4	7
PID_REELINPATHWAY	PID_NOTCH_PATHWAY	0.636791	0	1675	44	8	36
PID_RETINOIC_ACID_PATHWAY	BIOCARTA_PTDINS_PATHWAY	0.643782	0	2094	28	5	23
PID_RHOA_PATHWAY	BIOCARTA_CALCINEURIN_PATHWAY	0.785466	0	1837	21	3	18
PID_RHOA_PATHWAY	PID_AJDISS_2PATHWAY	0.605354	0	1837	32	3	29
PID_RHOA_PATHWAY	PID_IGF1_PATHWAY	0.630638	0	1837	35	4	31
PID_RHOA_PATHWAY	PID_INSULIN_PATHWAY	0.602432	0	1837	47	7	40
PID_S1P_META_PATHWAY	PID_EPHA_FWDPATHWAY	0.707654	0	1943	8	1	7
PID_S1P_META_PATHWAY	PID_EPHBFWDPATHWAY	0.614447	0	1943	23	1	22
PID_S1P_META_PATHWAY	PID_ERBB1_RECEPTOR_PROXIMAL_PATHWAY	0.614413	0	1943	26	0	26
PID_S1P_S1P1_PATHWAY	SIG_INSULIN_RECEPTOR_PATHWAY_IN_CARDIAC_MYOCYTES	0.663322	0	1514	15	3	12
PID_S1P_S1P1_PATHWAY	SIG_PIP3_SIGNALING_IN_CARDIAC_MYOCTES	0.66595	0	1514	19	3	16
PID_S1P_S1P2_PATHWAY	PID_INSULIN_PATHWAY	0.609338	0	1888	13	3	10
PID_S1P_S1P4_PATHWAY	PID_IGF1_PATHWAY	0.611914	0	1800	7	2	5
PID_SMAD2_3PATHWAY	BIOCARTA_PTDINS_PATHWAY	0.658149	0	2070	27	2	25
PID_SYNDECAN_1_PATHWAY	PID_INSULIN_PATHWAY	0.634625	0	1840	10	4	6
PID_SYNDECAN_2_PATHWAY	PID_KITPATHWAY	0.601209	0	1922	44	5	39
PID_SYNDECAN_2_PATHWAY	REACTOME_REGULATION_OF_KIT_SIGNALING	0.765343	0	1922	19	1	18
PID_SYNDECAN_3_PATHWAY	PID_AJDISS_2PATHWAY	0.651545	0	1935	19	0	19
PID_SYNDECAN_4_PATHWAY	KEGG_ACUTE_MYELOID_LEUKEMIA	0.703716	0	944	5	0	5
PID_SYNDECAN_4_PATHWAY	KEGG_INSULIN_SIGNALING_PATHWAY	0.634553	0	944	6	1	5
PID_SYNDECAN_4_PATHWAY	KEGG_OOCYTE_MEIOSIS	0.609214	0	944	9	0	9
PID_SYNDECAN_4_PATHWAY	PID_BETACATENIN_NUC_PATHWAY	0.722637	0	944	5	1	4
PID_SYNDECAN_4_PATHWAY	REACTOME_OPIOID_SIGNALLING	0.675621	0	944	7	0	7
PID_TCRJNKPATHWAY	REACTOME_TGF_BETA_RECEPTOR_SIGNALING_ACTIVATES_SMADS	0.694934	0	1996	19	0	19
PID_TCRRASPATHWAY	KEGG_VASOPRESSIN_REGULATED_WATER_REABSORPTION	0.672487	0	2010	14	2	12
PID_TGFBRPATHWAY	KEGG_MELANOGENESIS	0.647636	0	2038	128	8	120
PID_THROMBIN_PAR1_PATHWAY	PID_IGF1_PATHWAY	0.624858	0	1743	24	2	22
PID_THROMBIN_PAR4_PATHWAY	BIOCARTA_PTDINS_PATHWAY	0.691302	0	1532	11	0	11
PID_TOLL_ENDOGENOUS_PATHWAY	PID_CDC42_PATHWAY	0.792427	0	542	1	0	1
PID_TOLL_ENDOGENOUS_PATHWAY	REACTOME_SEMA3A_PAK_DEPENDENT_AXON_REPULSION	0.993631	0	542	2	0	2
PID_TOLL_ENDOGENOUS_PATHWAY	REACTOME_SEMAPHORIN_INTERACTIONS	0.608384	0	542	4	0	4
PID_TXA2PATHWAY	PID_IGF1_PATHWAY	0.635309	0	1862	24	2	22
PID_UPA_UPAR_PATHWAY	KEGG_PROSTATE_CANCER	0.623648	0	1432	13	0	13
PID_UPA_UPAR_PATHWAY	PID_AJDISS_2PATHWAY	0.651558	0	1432	7	0	7
PID_UPA_UPAR_PATHWAY	PID_AR_PATHWAY	0.611407	0	1432	16	0	16
PID_UPA_UPAR_PATHWAY	PID_ECADHERIN_NASCENTAJ_PATHWAY	0.760714	0	1432	14	0	14
PID_UPA_UPAR_PATHWAY	PID_INSULIN_PATHWAY	0.619792	0	1432	20	0	20
PID_UPA_UPAR_PATHWAY	PID_MET_PATHWAY	0.674883	0	1432	26	0	26
PID_UPA_UPAR_PATHWAY	PID_TRKRPATHWAY	0.676212	0	1432	17	0	17
PID_UPA_UPAR_PATHWAY	PID_VEGFR1_2_PATHWAY	0.63275	0	1432	22	0	22
PID_VEGF_VEGFR_PATHWAY	PID_EPHBFWDPATHWAY	0.624409	0	1105	9	1	8
PID_VEGF_VEGFR_PATHWAY	REACTOME_INSULIN_RECEPTOR_SIGNALLING_CASCADE	0.616792	0	1105	4	0	4
PID_WNT_NONCANONICAL_PATHWAY	PID_INSULIN_PATHWAY	0.664755	0	1997	23	3	20
REACTOME_3_UTR_MEDIATED_TRANSLATIONAL_REGULATION	PID_RET_PATHWAY	0.625188	0	1760	3	2	1
REACTOME_ABCA_TRANSPORTERS_IN_LIPID_HOMEOSTASIS	KEGG_AXON_GUIDANCE	0.648419	0	605	3	0	3
REACTOME_ABCA_TRANSPORTERS_IN_LIPID_HOMEOSTASIS	KEGG_TIGHT_JUNCTION	0.662091	0	605	2	0	2
REACTOME_ACETYLCHOLINE_NEUROTRANSMITTER_RELEASE_CYCLE	PID_EPHBFWDPATHWAY	0.729023	0	1002	0	0	0
REACTOME_ACETYLCHOLINE_NEUROTRANSMITTER_RELEASE_CYCLE	PID_FAK_PATHWAY	0.623444	0	1002	0	0	0
REACTOME_ACETYLCHOLINE_NEUROTRANSMITTER_RELEASE_CYCLE	PID_PDGFRBPATHWAY	0.694622	0	1002	1	0	1
REACTOME_ACTIVATED_AMPK_STIMULATES_FATTY_ACID_OXIDATION_IN_MUSCLE	KEGG_ERBB_SIGNALING_PATHWAY	0.628673	0	1056	12	1	11
REACTOME_ACTIVATED_AMPK_STIMULATES_FATTY_ACID_OXIDATION_IN_MUSCLE	KEGG_FC_GAMMA_R_MEDIATED_PHAGOCYTOSIS	0.613533	0	1056	11	0	11
REACTOME_ACTIVATED_AMPK_STIMULATES_FATTY_ACID_OXIDATION_IN_MUSCLE	KEGG_GNRH_SIGNALING_PATHWAY	0.705367	0	1056	14	2	12
REACTOME_ACTIVATED_AMPK_STIMULATES_FATTY_ACID_OXIDATION_IN_MUSCLE	KEGG_MELANOGENESIS	0.600883	0	1056	16	1	15
REACTOME_ACTIVATED_AMPK_STIMULATES_FATTY_ACID_OXIDATION_IN_MUSCLE	PID_MTOR_4PATHWAY	0.600554	0	1056	12	1	11
REACTOME_ACTIVATED_AMPK_STIMULATES_FATTY_ACID_OXIDATION_IN_MUSCLE	REACTOME_SIGNALING_BY_ILS	0.625343	0	1056	12	2	10
REACTOME_ACTIVATED_NOTCH1_TRANSMITS_SIGNAL_TO_THE_NUCLEUS	REACTOME_NETRIN1_SIGNALING	0.630639	0	1983	11	0	11
REACTOME_ACTIVATED_TAK1_MEDIATES_P38_MAPK_ACTIVATION	KEGG_ACUTE_MYELOID_LEUKEMIA	0.602254	0	1906	14	0	14
REACTOME_ACTIVATED_TAK1_MEDIATES_P38_MAPK_ACTIVATION	PID_VEGFR1_PATHWAY	0.659891	0	1906	18	2	16
REACTOME_ACTIVATION_OF_BH3_ONLY_PROTEINS	REACTOME_OPIOID_SIGNALLING	0.60301	0	1733	10	4	6
REACTOME_ACTIVATION_OF_CHAPERONE_GENES_BY_XBP1S	PID_LKB1_PATHWAY	0.608504	0	2060	33	1	32
REACTOME_ACTIVATION_OF_KAINATE_RECEPTORS_UPON_GLUTAMATE_BINDING	BIOCARTA_RAB_PATHWAY	0.748706	0	1747	8	0	8
REACTOME_ACTIVATION_OF_KAINATE_RECEPTORS_UPON_GLUTAMATE_BINDING	PID_IGF1_PATHWAY	0.627859	0	1747	11	0	11
REACTOME_ACTIVATION_OF_KAINATE_RECEPTORS_UPON_GLUTAMATE_BINDING	PID_PI3KCIAKTPATHWAY	0.645874	0	1747	7	1	6
REACTOME_ACTIVATION_OF_NF_KAPPAB_IN_B_CELLS	PID_ECADHERIN_NASCENTAJ_PATHWAY	0.618634	0	1707	16	0	16
REACTOME_ACTIVATION_OF_NF_KAPPAB_IN_B_CELLS	PID_VEGFR1_PATHWAY	0.679193	0	1707	18	3	15
REACTOME_ACTIVATION_OF_RAC	REACTOME_DOWNREGULATION_OF_TGF_BETA_RECEPTOR_SIGNALING	0.719234	0	1324	6	2	4
REACTOME_ACTIVATION_OF_RAC	REACTOME_SIGNALING_BY_TGF_BETA_RECEPTOR_COMPLEX	0.664377	0	1324	10	4	6
REACTOME_ACTIVATION_OF_RAC	REACTOME_TGF_BETA_RECEPTOR_SIGNALING_ACTIVATES_SMADS	0.722927	0	1324	6	2	4
REACTOME_ACYL_CHAIN_REMODELLING_OF_PC	REACTOME_PLC_BETA_MEDIATED_EVENTS	0.672783	0	1137	2	0	2
REACTOME_ADENYLATE_CYCLASE_ACTIVATING_PATHWAY	BIOCARTA_AT1R_PATHWAY	0.673581	0	1374	3	0	3
REACTOME_ADENYLATE_CYCLASE_ACTIVATING_PATHWAY	BIOCARTA_MAPK_PATHWAY	0.712686	0	1374	4	1	3
REACTOME_ADENYLATE_CYCLASE_ACTIVATING_PATHWAY	PID_NETRIN_PATHWAY	0.708218	0	1374	0	0	0
REACTOME_ADENYLATE_CYCLASE_ACTIVATING_PATHWAY	PID_SMAD2_3NUCLEARPATHWAY	0.614271	0	1374	3	1	2
REACTOME_ADENYLATE_CYCLASE_ACTIVATING_PATHWAY	PID_VEGFR1_PATHWAY	0.770914	0	1374	2	1	1
REACTOME_ADENYLATE_CYCLASE_ACTIVATING_PATHWAY	REACTOME_NETRIN1_SIGNALING	0.70234	0	1374	0	0	0
REACTOME_ADENYLATE_CYCLASE_ACTIVATING_PATHWAY	REACTOME_TGF_BETA_RECEPTOR_SIGNALING_ACTIVATES_SMADS	0.626361	0	1374	3	0	3
REACTOME_ADENYLATE_CYCLASE_INHIBITORY_PATHWAY	PID_E2F_PATHWAY	0.600348	0	1527	7	1	6
REACTOME_ADENYLATE_CYCLASE_INHIBITORY_PATHWAY	PID_IGF1_PATHWAY	0.734711	0	1527	5	1	4
REACTOME_ADENYLATE_CYCLASE_INHIBITORY_PATHWAY	PID_INSULIN_PATHWAY	0.672096	0	1527	5	1	4
REACTOME_ADENYLATE_CYCLASE_INHIBITORY_PATHWAY	PID_NOTCH_PATHWAY	0.645642	0	1527	8	0	8
REACTOME_ADENYLATE_CYCLASE_INHIBITORY_PATHWAY	PID_RB_1PATHWAY	0.600479	0	1527	6	0	6
REACTOME_ADENYLATE_CYCLASE_INHIBITORY_PATHWAY	SIG_INSULIN_RECEPTOR_PATHWAY_IN_CARDIAC_MYOCYTES	0.616145	0	1527	9	1	8
REACTOME_ADENYLATE_CYCLASE_INHIBITORY_PATHWAY	ST_G_ALPHA_I_PATHWAY	0.619807	0	1527	5	0	5
REACTOME_ADP_SIGNALLING_THROUGH_P2RY1	PID_KITPATHWAY	0.600929	0	2061	13	0	13
REACTOME_AKT_PHOSPHORYLATES_TARGETS_IN_THE_CYTOSOL	PID_NOTCH_PATHWAY	0.650663	0	1463	4	0	4
REACTOME_AMYLOIDS	PID_BETACATENIN_NUC_PATHWAY	0.631525	0	1587	6	0	6
REACTOME_ANTIGEN_PRESENTATION_FOLDING_ASSEMBLY_AND_PEPTIDE_LOADING_OF_CLASS_I_MHC	PID_AP1_PATHWAY	0.649928	0	1649	20	0	20
REACTOME_ANTIGEN_PRESENTATION_FOLDING_ASSEMBLY_AND_PEPTIDE_LOADING_OF_CLASS_I_MHC	PID_RB_1PATHWAY	0.665804	0	1649	13	0	13
REACTOME_ANTIGEN_PRESENTATION_FOLDING_ASSEMBLY_AND_PEPTIDE_LOADING_OF_CLASS_I_MHC	REACTOME_G1_PHASE	0.758706	0	1649	6	0	6
REACTOME_ANTIGEN_PROCESSING_CROSS_PRESENTATION	PID_ECADHERIN_NASCENTAJ_PATHWAY	0.664767	0	1633	9	0	9
REACTOME_ANTIGEN_PROCESSING_UBIQUITINATION_PROTEASOME_DEGRADATION	BIOCARTA_CHREBP2_PATHWAY	0.675167	0	1910	85	6	79
REACTOME_ANTIGEN_PROCESSING_UBIQUITINATION_PROTEASOME_DEGRADATION	PID_KITPATHWAY	0.624969	0	1910	158	12	146
REACTOME_ANTIGEN_PROCESSING_UBIQUITINATION_PROTEASOME_DEGRADATION	PID_NFAT_3PATHWAY	0.635031	0	1910	111	10	101
REACTOME_ANTIVIRAL_MECHANISM_BY_IFN_STIMULATED_GENES	BIOCARTA_TCR_PATHWAY	0.744713	0	1814	35	3	32
REACTOME_ANTIVIRAL_MECHANISM_BY_IFN_STIMULATED_GENES	KEGG_LONG_TERM_POTENTIATION	0.623799	0	1814	63	13	50
REACTOME_ANTIVIRAL_MECHANISM_BY_IFN_STIMULATED_GENES	PID_CDC42_PATHWAY	0.600649	0	1814	95	16	79
REACTOME_APC_C_CDH1_MEDIATED_DEGRADATION_OF_CDC20_AND_OTHER_APC_C_CDH1_TARGETED_PROTEINS_IN_LATE_MITOSIS_EARLY_G1	PID_NFAT_3PATHWAY	0.740984	0	1207	12	4	8
REACTOME_APOPTOSIS_INDUCED_DNA_FRAGMENTATION	KEGG_MELANOGENESIS	0.622283	0	1678	10	1	9
REACTOME_APOPTOSIS_INDUCED_DNA_FRAGMENTATION	KEGG_VASOPRESSIN_REGULATED_WATER_REABSORPTION	0.652641	0	1678	6	0	6
REACTOME_APOPTOSIS_INDUCED_DNA_FRAGMENTATION	PID_ER_NONGENOMIC_PATHWAY	0.679609	0	1678	6	2	4
REACTOME_APOPTOSIS_INDUCED_DNA_FRAGMENTATION	PID_TRKRPATHWAY	0.634302	0	1678	5	0	5
REACTOME_APOPTOSIS_INDUCED_DNA_FRAGMENTATION	REACTOME_OPIOID_SIGNALLING	0.725391	0	1678	3	1	2
REACTOME_APOPTOTIC_CLEAVAGE_OF_CELLULAR_PROTEINS	KEGG_LONG_TERM_DEPRESSION	0.670449	0	2035	23	1	22
REACTOME_APOPTOTIC_CLEAVAGE_OF_CELLULAR_PROTEINS	KEGG_MELANOGENESIS	0.630313	0	2035	36	3	33
REACTOME_ARMS_MEDIATED_ACTIVATION	PID_AJDISS_2PATHWAY	0.626076	0	1750	18	0	18
REACTOME_ASPARAGINE_N_LINKED_GLYCOSYLATION	BIOCARTA_PTDINS_PATHWAY	0.651793	0	2142	34	1	33
REACTOME_ASSEMBLY_OF_THE_PRE_REPLICATIVE_COMPLEX	SIG_INSULIN_RECEPTOR_PATHWAY_IN_CARDIAC_MYOCYTES	0.616259	0	1481	6	1	5
REACTOME_ASSOCIATION_OF_TRIC_CCT_WITH_TARGET_PROTEINS_DURING_BIOSYNTHESIS	BIOCARTA_TCR_PATHWAY	0.600376	0	2020	10	0	10
REACTOME_AUTODEGRADATION_OF_CDH1_BY_CDH1_APC_C	PID_BETACATENIN_NUC_PATHWAY	0.749997	0	1070	9	2	7
REACTOME_AUTODEGRADATION_OF_CDH1_BY_CDH1_APC_C	PID_CDC42_PATHWAY	0.65107	0	1070	18	2	16
REACTOME_AUTODEGRADATION_OF_CDH1_BY_CDH1_APC_C	PID_PDGFRBPATHWAY	0.606183	0	1070	22	3	19
REACTOME_AUTODEGRADATION_OF_CDH1_BY_CDH1_APC_C	REACTOME_PI_METABOLISM	0.725414	0	1070	9	2	7
REACTOME_AUTODEGRADATION_OF_CDH1_BY_CDH1_APC_C	SIG_PIP3_SIGNALING_IN_CARDIAC_MYOCTES	0.758709	0	1070	7	2	5
REACTOME_AUTODEGRADATION_OF_THE_E3_UBIQUITIN_LIGASE_COP1	BIOCARTA_AT1R_PATHWAY	0.726161	0	1158	8	1	7
REACTOME_A_TETRASACCHARIDE_LINKER_SEQUENCE_IS_REQUIRED_FOR_GAG_SYNTHESIS	PID_CMYB_PATHWAY	0.615259	0	1275	6	0	6
REACTOME_A_TETRASACCHARIDE_LINKER_SEQUENCE_IS_REQUIRED_FOR_GAG_SYNTHESIS	PID_ILK_PATHWAY	0.868745	0	1275	7	3	4
REACTOME_BIOSYNTHESIS_OF_THE_N_GLYCAN_PRECURSOR_DOLICHOL_LIPID_LINKED_OLIGOSACCHARIDE_LLO_AND_TRANSFER_TO_A_NASCENT_PROTEIN	PID_ECADHERIN_KERATINOCYTE_PATHWAY	0.670003	0	1854	3	0	3
REACTOME_BIOSYNTHESIS_OF_THE_N_GLYCAN_PRECURSOR_DOLICHOL_LIPID_LINKED_OLIGOSACCHARIDE_LLO_AND_TRANSFER_TO_A_NASCENT_PROTEIN	REACTOME_REGULATION_OF_KIT_SIGNALING	0.762751	0	1854	5	0	5
REACTOME_BMAL1_CLOCK_NPAS2_ACTIVATES_CIRCADIAN_EXPRESSION	BIOCARTA_PTDINS_PATHWAY	0.646418	0	2029	35	6	29
REACTOME_BMAL1_CLOCK_NPAS2_ACTIVATES_CIRCADIAN_EXPRESSION	BIOCARTA_TCR_PATHWAY	0.626395	0	2029	32	1	31
REACTOME_BMAL1_CLOCK_NPAS2_ACTIVATES_CIRCADIAN_EXPRESSION	PID_KITPATHWAY	0.616179	0	2029	73	11	62
REACTOME_BOTULINUM_NEUROTOXICITY	BIOCARTA_GPCR_PATHWAY	0.70613	0	2069	7	0	7
REACTOME_CALNEXIN_CALRETICULIN_CYCLE	KEGG_ADHERENS_JUNCTION	0.648282	0	2107	30	0	30
REACTOME_CALNEXIN_CALRETICULIN_CYCLE	PID_NETRIN_PATHWAY	0.720594	0	2107	13	0	13
REACTOME_CASPASE_MEDIATED_CLEAVAGE_OF_CYTOSKELETAL_PROTEINS	PID_ERBB1_INTERNALIZATION_PATHWAY	0.628109	0	1351	5	1	4
REACTOME_CASPASE_MEDIATED_CLEAVAGE_OF_CYTOSKELETAL_PROTEINS	SIG_INSULIN_RECEPTOR_PATHWAY_IN_CARDIAC_MYOCYTES	0.61825	0	1351	2	0	2
REACTOME_CASPASE_MEDIATED_CLEAVAGE_OF_CYTOSKELETAL_PROTEINS	SIG_PIP3_SIGNALING_IN_CARDIAC_MYOCTES	0.610582	0	1351	3	0	3
REACTOME_CD28_DEPENDENT_VAV1_PATHWAY	BIOCARTA_RAB_PATHWAY	0.800165	0	1545	4	0	4
REACTOME_CD28_DEPENDENT_VAV1_PATHWAY	PID_NOTCH_PATHWAY	0.624752	0	1545	6	0	6
REACTOME_CD28_DEPENDENT_VAV1_PATHWAY	PID_PI3KPLCTRKPATHWAY	0.626315	0	1545	8	0	8
REACTOME_CD28_DEPENDENT_VAV1_PATHWAY	PID_TRKRPATHWAY	0.638496	0	1545	13	1	12
REACTOME_CDK_MEDIATED_PHOSPHORYLATION_AND_REMOVAL_OF_CDC6	PID_ECADHERIN_NASCENTAJ_PATHWAY	0.613689	0	802	3	0	3
REACTOME_CDK_MEDIATED_PHOSPHORYLATION_AND_REMOVAL_OF_CDC6	SIG_INSULIN_RECEPTOR_PATHWAY_IN_CARDIAC_MYOCYTES	0.763918	0	802	3	1	2
REACTOME_CELL_CELL_JUNCTION_ORGANIZATION	BIOCARTA_ECM_PATHWAY	0.699104	0	2029	12	0	12
REACTOME_CELL_CELL_JUNCTION_ORGANIZATION	PID_SMAD2_3PATHWAY	0.707724	0	2029	21	1	20
REACTOME_CELL_DEATH_SIGNALLING_VIA_NRAGE_NRIF_AND_NADE	PID_INSULIN_PATHWAY	0.622253	0	1956	42	3	39
REACTOME_CELL_JUNCTION_ORGANIZATION	BIOCARTA_PTDINS_PATHWAY	0.666161	0	2086	15	1	14
REACTOME_CELL_JUNCTION_ORGANIZATION	PID_CDC42_PATHWAY	0.608107	0	2086	42	0	42
REACTOME_CELL_JUNCTION_ORGANIZATION	PID_IGF1_PATHWAY	0.65959	0	2086	28	1	27
REACTOME_CHOLESTEROL_BIOSYNTHESIS	PID_VEGFR1_PATHWAY	0.779563	0	1220	4	0	4
REACTOME_CHONDROITIN_SULFATE_BIOSYNTHESIS	PID_NETRIN_PATHWAY	0.625149	0	1708	6	0	6
REACTOME_CHONDROITIN_SULFATE_DERMATAN_SULFATE_METABOLISM	KEGG_MELANOGENESIS	0.606812	0	1934	20	1	19
REACTOME_CHYLOMICRON_MEDIATED_LIPID_TRANSPORT	BIOCARTA_MAPK_PATHWAY	0.651125	0	1223	0	0	0
REACTOME_CHYLOMICRON_MEDIATED_LIPID_TRANSPORT	BIOCARTA_TGFB_PATHWAY	0.707254	0	1223	0	0	0
REACTOME_CHYLOMICRON_MEDIATED_LIPID_TRANSPORT	PID_GLYPICAN_1PATHWAY	0.775466	0	1223	0	0	0
REACTOME_CHYLOMICRON_MEDIATED_LIPID_TRANSPORT	PID_HIF1_TFPATHWAY	0.665462	0	1223	2	0	2
REACTOME_CHYLOMICRON_MEDIATED_LIPID_TRANSPORT	PID_RB_1PATHWAY	0.648627	0	1223	0	0	0
REACTOME_CIRCADIAN_CLOCK	BIOCARTA_PTDINS_PATHWAY	0.748795	0	2033	44	7	37
REACTOME_CIRCADIAN_CLOCK	KEGG_MELANOGENESIS	0.61187	0	2033	87	12	75
REACTOME_CLASS_I_MHC_MEDIATED_ANTIGEN_PROCESSING_PRESENTATION	BIOCARTA_CHREBP2_PATHWAY	0.678871	0	1944	103	6	97
REACTOME_CLASS_I_MHC_MEDIATED_ANTIGEN_PROCESSING_PRESENTATION	PID_CDC42_PATHWAY	0.602627	0	1944	265	23	242
REACTOME_CLASS_I_MHC_MEDIATED_ANTIGEN_PROCESSING_PRESENTATION	PID_KITPATHWAY	0.618617	0	1944	179	12	167
REACTOME_CLASS_I_MHC_MEDIATED_ANTIGEN_PROCESSING_PRESENTATION	REACTOME_REGULATION_OF_KIT_SIGNALING	0.693453	0	1944	71	7	64
REACTOME_CLEAVAGE_OF_GROWING_TRANSCRIPT_IN_THE_TERMINATION_REGION_	SIG_CHEMOTAXIS	0.668635	0	1963	14	2	12
REACTOME_COLLAGEN_FORMATION	PID_LKB1_PATHWAY	0.886977	0	837	2	0	2
REACTOME_CONVERSION_FROM_APC_C_CDC20_TO_APC_C_CDH1_IN_LATE_ANAPHASE	KEGG_LONG_TERM_POTENTIATION	0.615211	0	1309	12	1	11
REACTOME_COPI_MEDIATED_TRANSPORT	BIOCARTA_PYK2_PATHWAY	0.743767	0	1818	5	0	5
REACTOME_COPI_MEDIATED_TRANSPORT	BIOCARTA_TCR_PATHWAY	0.648782	0	1818	2	0	2
REACTOME_COPI_MEDIATED_TRANSPORT	PID_ERBB1_RECEPTOR_PROXIMAL_PATHWAY	0.614668	0	1818	11	0	11
REACTOME_COPI_MEDIATED_TRANSPORT	PID_NCADHERINPATHWAY	0.693238	0	1818	7	0	7
REACTOME_COPI_MEDIATED_TRANSPORT	REACTOME_NETRIN1_SIGNALING	0.634884	0	1818	6	0	6
REACTOME_COPI_MEDIATED_TRANSPORT	REACTOME_TRANSCRIPTIONAL_ACTIVITY_OF_SMAD2_SMAD3_SMAD4_HETEROTRIMER	0.619272	0	1818	8	1	7
REACTOME_CREB_PHOSPHORYLATION_THROUGH_THE_ACTIVATION_OF_CAMKII	KEGG_TGF_BETA_SIGNALING_PATHWAY	0.62542	0	1227	19	6	13
REACTOME_CREB_PHOSPHORYLATION_THROUGH_THE_ACTIVATION_OF_CAMKII	REACTOME_DOWNREGULATION_OF_SMAD2_3_SMAD4_TRANSCRIPTIONAL_ACTIVITY	0.779831	0	1227	8	1	7
REACTOME_CREB_PHOSPHORYLATION_THROUGH_THE_ACTIVATION_OF_CAMKII	REACTOME_TRANSCRIPTIONAL_ACTIVITY_OF_SMAD2_SMAD3_SMAD4_HETEROTRIMER	0.713119	0	1227	12	2	10
REACTOME_CREB_PHOSPHORYLATION_THROUGH_THE_ACTIVATION_OF_RAS	REACTOME_DOWNREGULATION_OF_TGF_BETA_RECEPTOR_SIGNALING	0.614639	0	1666	18	0	18
REACTOME_CRMPS_IN_SEMA3A_SIGNALING	REACTOME_DOWNSTREAM_SIGNAL_TRANSDUCTION	0.607774	0	1171	10	2	8
REACTOME_CRMPS_IN_SEMA3A_SIGNALING	REACTOME_SIGNALING_BY_ERBB2	0.604495	0	1171	11	2	9
REACTOME_CROSS_PRESENTATION_OF_SOLUBLE_EXOGENOUS_ANTIGENS_ENDOSOMES	PID_PDGFRBPATHWAY	0.614149	0	802	10	3	7
REACTOME_CROSS_PRESENTATION_OF_SOLUBLE_EXOGENOUS_ANTIGENS_ENDOSOMES	SIG_INSULIN_RECEPTOR_PATHWAY_IN_CARDIAC_MYOCYTES	0.763918	0	802	3	1	2
REACTOME_CTNNB1_PHOSPHORYLATION_CASCADE	KEGG_ADHERENS_JUNCTION	0.60724	0	1848	37	0	37
REACTOME_CTNNB1_PHOSPHORYLATION_CASCADE	KEGG_LONG_TERM_POTENTIATION	0.604785	0	1848	28	1	27
REACTOME_CTNNB1_PHOSPHORYLATION_CASCADE	PID_GLYPICAN_1PATHWAY	0.768398	0	1848	8	0	8
REACTOME_CYCLIN_E_ASSOCIATED_EVENTS_DURING_G1_S_TRANSITION_	KEGG_ACUTE_MYELOID_LEUKEMIA	0.600422	0	1300	3	0	3
REACTOME_CYCLIN_E_ASSOCIATED_EVENTS_DURING_G1_S_TRANSITION_	PID_P53DOWNSTREAMPATHWAY	0.604151	0	1300	8	0	8
REACTOME_CYCLIN_E_ASSOCIATED_EVENTS_DURING_G1_S_TRANSITION_	PID_RB_1PATHWAY	0.66751	0	1300	4	0	4
REACTOME_DAG_AND_IP3_SIGNALING	PID_ER_NONGENOMIC_PATHWAY	0.62968	0	2019	21	2	19
REACTOME_DEGRADATION_OF_THE_EXTRACELLULAR_MATRIX	PID_INSULIN_PATHWAY	0.602347	0	1001	2	0	2
REACTOME_DEGRADATION_OF_THE_EXTRACELLULAR_MATRIX	PID_TRKRPATHWAY	0.61428	0	1001	6	0	6
REACTOME_DESTABILIZATION_OF_MRNA_BY_AUF1_HNRNP_D0	PID_MTOR_4PATHWAY	0.679746	0	1084	7	0	7
REACTOME_DESTABILIZATION_OF_MRNA_BY_AUF1_HNRNP_D0	REACTOME_SIGNALING_BY_SCF_KIT	0.633323	0	1084	8	2	6
REACTOME_DIABETES_PATHWAYS	BIOCARTA_AT1R_PATHWAY	0.63455	0	2108	39	3	36
REACTOME_DNA_REPLICATION	BIOCARTA_TCR_PATHWAY	0.626348	0	2043	51	2	49
REACTOME_DOPAMINE_NEUROTRANSMITTER_RELEASE_CYCLE	PID_EPHBFWDPATHWAY	0.729023	0	1002	0	0	0
REACTOME_DOPAMINE_NEUROTRANSMITTER_RELEASE_CYCLE	PID_FAK_PATHWAY	0.623444	0	1002	0	0	0
REACTOME_DOPAMINE_NEUROTRANSMITTER_RELEASE_CYCLE	PID_PDGFRBPATHWAY	0.694622	0	1002	1	0	1
REACTOME_DOUBLE_STRAND_BREAK_REPAIR	REACTOME_REGULATION_OF_KIT_SIGNALING	0.790073	0	1783	3	0	3
REACTOME_DOWNREGULATION_OF_ERBB2_ERBB3_SIGNALING	PID_AP1_PATHWAY	0.612943	0	1398	10	2	8
REACTOME_DOWNREGULATION_OF_ERBB2_ERBB3_SIGNALING	PID_BETACATENIN_NUC_PATHWAY	0.619481	0	1398	11	1	10
REACTOME_DOWNREGULATION_OF_ERBB2_ERBB3_SIGNALING	PID_GLYPICAN_1PATHWAY	0.745889	0	1398	4	0	4
REACTOME_DOWNREGULATION_OF_ERBB2_ERBB3_SIGNALING	REACTOME_MYOGENESIS	0.873829	0	1398	4	0	4
REACTOME_DOWNSTREAM_SIGNALING_EVENTS_OF_B_CELL_RECEPTOR_BCR	KEGG_MELANOGENESIS	0.612384	0	1975	82	11	71
REACTOME_DOWNSTREAM_SIGNALING_EVENTS_OF_B_CELL_RECEPTOR_BCR	PID_ERBB1_RECEPTOR_PROXIMAL_PATHWAY	0.613516	0	1975	67	12	55
REACTOME_E2F_MEDIATED_REGULATION_OF_DNA_REPLICATION	PID_FOXOPATHWAY	0.617956	0	1576	6	1	5
REACTOME_EARLY_PHASE_OF_HIV_LIFE_CYCLE	REACTOME_MYOGENESIS	0.69375	0	1687	2	0	2
REACTOME_EGFR_DOWNREGULATION	REACTOME_DOWNREGULATION_OF_TGF_BETA_RECEPTOR_SIGNALING	0.65563	0	1907	18	1	17
REACTOME_EGFR_DOWNREGULATION	REACTOME_TGF_BETA_RECEPTOR_SIGNALING_ACTIVATES_SMADS	0.641568	0	1907	22	1	21
REACTOME_ENDOSOMAL_SORTING_COMPLEX_REQUIRED_FOR_TRANSPORT_ESCRT	PID_NETRIN_PATHWAY	0.625589	0	2046	18	0	18
REACTOME_ENDOSOMAL_VACUOLAR_PATHWAY	PID_PDGFRBPATHWAY	0.728421	0	394	0	0	0
REACTOME_ENERGY_DEPENDENT_REGULATION_OF_MTOR_BY_LKB1_AMPK	BIOCARTA_AT1R_PATHWAY	0.732875	0	1525	16	1	15
REACTOME_ENERGY_DEPENDENT_REGULATION_OF_MTOR_BY_LKB1_AMPK	BIOCARTA_PGC1A_PATHWAY	0.857611	0	1525	10	0	10
REACTOME_ENERGY_DEPENDENT_REGULATION_OF_MTOR_BY_LKB1_AMPK	KEGG_OOCYTE_MEIOSIS	0.629374	0	1525	20	2	18
REACTOME_ENERGY_DEPENDENT_REGULATION_OF_MTOR_BY_LKB1_AMPK	KEGG_VASOPRESSIN_REGULATED_WATER_REABSORPTION	0.666649	0	1525	14	2	12
REACTOME_ENERGY_DEPENDENT_REGULATION_OF_MTOR_BY_LKB1_AMPK	PID_MYC_REPRESSPATHWAY	0.687787	0	1525	12	1	11
REACTOME_ENERGY_DEPENDENT_REGULATION_OF_MTOR_BY_LKB1_AMPK	REACTOME_MYOGENESIS	0.730342	0	1525	11	0	11
REACTOME_ERKS_ARE_INACTIVATED	REACTOME_DOWNREGULATION_OF_SMAD2_3_SMAD4_TRANSCRIPTIONAL_ACTIVITY	0.678457	0	1543	7	1	6
REACTOME_ERKS_ARE_INACTIVATED	REACTOME_SIGNALLING_BY_NGF	0.614312	0	1543	23	2	21
REACTOME_ERKS_ARE_INACTIVATED	REACTOME_TRANSCRIPTIONAL_ACTIVITY_OF_SMAD2_SMAD3_SMAD4_HETEROTRIMER	0.643841	0	1543	12	1	11
REACTOME_ER_PHAGOSOME_PATHWAY	PID_ECADHERIN_NASCENTAJ_PATHWAY	0.69821	0	1513	7	0	7
REACTOME_FACTORS_INVOLVED_IN_MEGAKARYOCYTE_DEVELOPMENT_AND_PLATELET_PRODUCTION	KEGG_LONG_TERM_DEPRESSION	0.608916	0	2081	76	5	71
REACTOME_FATTY_ACYL_COA_BIOSYNTHESIS	KEGG_GLIOMA	0.821385	0	954	7	0	7
REACTOME_FATTY_ACYL_COA_BIOSYNTHESIS	REACTOME_SIGNALING_BY_ERBB2	0.625177	0	954	12	0	12
REACTOME_FORMATION_OF_INCISION_COMPLEX_IN_GG_NER	PID_ERBB1_INTERNALIZATION_PATHWAY	0.812686	0	960	4	0	4
REACTOME_FORMATION_OF_THE_TERNARY_COMPLEX_AND_SUBSEQUENTLY_THE_43S_COMPLEX	KEGG_MELANOGENESIS	0.625414	0	1525	7	1	6
REACTOME_FORMATION_OF_THE_TERNARY_COMPLEX_AND_SUBSEQUENTLY_THE_43S_COMPLEX	KEGG_PROSTATE_CANCER	0.649413	0	1525	7	0	7
REACTOME_FORMATION_OF_THE_TERNARY_COMPLEX_AND_SUBSEQUENTLY_THE_43S_COMPLEX	PID_KITPATHWAY	0.648188	0	1525	4	0	4
REACTOME_FORMATION_OF_THE_TERNARY_COMPLEX_AND_SUBSEQUENTLY_THE_43S_COMPLEX	PID_NFAT_3PATHWAY	0.660416	0	1525	4	0	4
REACTOME_FORMATION_OF_THE_TERNARY_COMPLEX_AND_SUBSEQUENTLY_THE_43S_COMPLEX	REACTOME_OPIOID_SIGNALLING	0.655162	0	1525	4	1	3
REACTOME_FORMATION_OF_TRANSCRIPTION_COUPLED_NER_TC_NER_REPAIR_COMPLEX	KEGG_TGF_BETA_SIGNALING_PATHWAY	0.646453	0	1359	5	0	5
REACTOME_FORMATION_OF_TRANSCRIPTION_COUPLED_NER_TC_NER_REPAIR_COMPLEX	REACTOME_NETRIN1_SIGNALING	0.699691	0	1359	5	0	5
REACTOME_FRS2_MEDIATED_CASCADE	BIOCARTA_PTDINS_PATHWAY	0.70801	0	2092	17	3	14
REACTOME_G1_S_TRANSITION	PID_FOXOPATHWAY	0.666538	0	1466	9	1	8
REACTOME_GABA_B_RECEPTOR_ACTIVATION	BIOCARTA_MAPK_PATHWAY	0.616646	0	1656	16	1	15
REACTOME_GABA_B_RECEPTOR_ACTIVATION	PID_IGF1_PATHWAY	0.638311	0	1656	7	1	6
REACTOME_GABA_B_RECEPTOR_ACTIVATION	PID_PI3KPLCTRKPATHWAY	0.617427	0	1656	10	2	8
REACTOME_GABA_B_RECEPTOR_ACTIVATION	REACTOME_SIGNALING_BY_ROBO_RECEPTOR	0.745087	0	1656	6	0	6
REACTOME_GABA_RECEPTOR_ACTIVATION	BIOCARTA_MAPK_PATHWAY	0.616646	0	1656	16	1	15
REACTOME_GABA_RECEPTOR_ACTIVATION	PID_IGF1_PATHWAY	0.638311	0	1656	7	1	6
REACTOME_GABA_RECEPTOR_ACTIVATION	PID_PI3KPLCTRKPATHWAY	0.617427	0	1656	10	2	8
REACTOME_GABA_RECEPTOR_ACTIVATION	REACTOME_SIGNALING_BY_ROBO_RECEPTOR	0.745087	0	1656	6	0	6
REACTOME_GABA_SYNTHESIS_RELEASE_REUPTAKE_AND_DEGRADATION	KEGG_TIGHT_JUNCTION	0.722687	0	908	1	0	1
REACTOME_GABA_SYNTHESIS_RELEASE_REUPTAKE_AND_DEGRADATION	PID_PDGFRBPATHWAY	0.612972	0	908	1	0	1
REACTOME_GAMMA_CARBOXYLATION_TRANSPORT_AND_AMINO_TERMINAL_CLEAVAGE_OF_PROTEINS	KEGG_AXON_GUIDANCE	0.625347	0	955	5	0	5
REACTOME_GAP_JUNCTION_ASSEMBLY	PID_PI3KCIAKTPATHWAY	0.862842	0	665	3	0	3
REACTOME_GAP_JUNCTION_DEGRADATION	REACTOME_MYOGENESIS	0.753735	0	1951	3	0	3
REACTOME_GLOBAL_GENOMIC_NER_GG_NER	PID_ERBB1_INTERNALIZATION_PATHWAY	0.812686	0	960	4	0	4
REACTOME_GLUCAGON_SIGNALING_IN_METABOLIC_REGULATION	BIOCARTA_ALK_PATHWAY	0.643399	0	2125	14	0	14
REACTOME_GLUCAGON_SIGNALING_IN_METABOLIC_REGULATION	PID_BMPPATHWAY	0.627172	0	2125	21	1	20
REACTOME_GLUCAGON_SIGNALING_IN_METABOLIC_REGULATION	PID_CDC42_PATHWAY	0.62042	0	2125	30	2	28
REACTOME_GLUCAGON_SIGNALING_IN_METABOLIC_REGULATION	PID_NETRIN_PATHWAY	0.713068	0	2125	12	1	11
REACTOME_GLUCAGON_SIGNALING_IN_METABOLIC_REGULATION	REACTOME_SIGNALING_BY_ROBO_RECEPTOR	0.644334	0	2125	12	0	12
REACTOME_GLUCOSE_TRANSPORT	BIOCARTA_TCR_PATHWAY	0.644289	0	2002	23	1	22
REACTOME_GLYCEROPHOSPHOLIPID_BIOSYNTHESIS	BIOCARTA_TCR_PATHWAY	0.661605	0	1990	30	2	28
REACTOME_GLYCEROPHOSPHOLIPID_BIOSYNTHESIS	KEGG_ACUTE_MYELOID_LEUKEMIA	0.626817	0	1990	27	3	24
REACTOME_GLYCEROPHOSPHOLIPID_BIOSYNTHESIS	PID_EPHBFWDPATHWAY	0.664725	0	1990	36	1	35
REACTOME_GLYCEROPHOSPHOLIPID_BIOSYNTHESIS	PID_NETRIN_PATHWAY	0.69258	0	1990	28	1	27
REACTOME_GLYCOSAMINOGLYCAN_METABOLISM	BIOCARTA_CHREBP2_PATHWAY	0.619759	0	2076	15	0	15
REACTOME_GLYCOSAMINOGLYCAN_METABOLISM	PID_NETRIN_PATHWAY	0.739008	0	2076	29	1	28
REACTOME_GLYCOSAMINOGLYCAN_METABOLISM	REACTOME_CTLA4_INHIBITORY_SIGNALING	0.677147	0	2076	17	1	16
REACTOME_GLYCOSPHINGOLIPID_METABOLISM	REACTOME_TGF_BETA_RECEPTOR_SIGNALING_ACTIVATES_SMADS	0.676712	0	798	1	0	1
REACTOME_GOLGI_ASSOCIATED_VESICLE_BIOGENESIS	BIOCARTA_ALK_PATHWAY	0.620083	0	1909	63	11	52
REACTOME_GPCR_DOWNSTREAM_SIGNALING	REACTOME_DOWNREGULATION_OF_TGF_BETA_RECEPTOR_SIGNALING	0.61233	0	2058	53	7	46
REACTOME_GPVI_MEDIATED_ACTIVATION_CASCADE	BIOCARTA_RAB_PATHWAY	0.765908	0	1646	6	0	6
REACTOME_GPVI_MEDIATED_ACTIVATION_CASCADE	PID_PI3KPLCTRKPATHWAY	0.606199	0	1646	23	0	23
REACTOME_GPVI_MEDIATED_ACTIVATION_CASCADE	REACTOME_DOWNREGULATION_OF_SMAD2_3_SMAD4_TRANSCRIPTIONAL_ACTIVITY	0.717476	0	1646	3	1	2
REACTOME_GRB2_EVENTS_IN_ERBB2_SIGNALING	KEGG_VASOPRESSIN_REGULATED_WATER_REABSORPTION	0.600799	0	1960	17	2	15
REACTOME_GRB2_SOS_PROVIDES_LINKAGE_TO_MAPK_SIGNALING_FOR_INTERGRINS_	PID_TGFBRPATHWAY	0.671888	0	992	20	3	17
REACTOME_GRB2_SOS_PROVIDES_LINKAGE_TO_MAPK_SIGNALING_FOR_INTERGRINS_	REACTOME_NEUROTRANSMITTER_RECEPTOR_BINDING_AND_DOWNSTREAM_TRANSMISSION_IN_THE_POSTSYNAPTIC_CELL	0.609469	0	992	8	1	7
REACTOME_GRB2_SOS_PROVIDES_LINKAGE_TO_MAPK_SIGNALING_FOR_INTERGRINS_	REACTOME_OPIOID_SIGNALLING	0.668208	0	992	12	2	10
REACTOME_GRB2_SOS_PROVIDES_LINKAGE_TO_MAPK_SIGNALING_FOR_INTERGRINS_	REACTOME_SIGNALING_BY_TGF_BETA_RECEPTOR_COMPLEX	0.705404	0	992	15	4	11
REACTOME_GRB2_SOS_PROVIDES_LINKAGE_TO_MAPK_SIGNALING_FOR_INTERGRINS_	REACTOME_TGF_BETA_RECEPTOR_SIGNALING_ACTIVATES_SMADS	0.775252	0	992	9	2	7
REACTOME_G_ALPHA_I_SIGNALLING_EVENTS	BIOCARTA_PTDINS_PATHWAY	0.608965	0	1921	8	1	7
REACTOME_G_ALPHA_I_SIGNALLING_EVENTS	BIOCARTA_RAB_PATHWAY	0.757334	0	1921	9	0	9
REACTOME_G_ALPHA_I_SIGNALLING_EVENTS	PID_NFAT_3PATHWAY	0.600118	0	1921	14	2	12
REACTOME_G_ALPHA_I_SIGNALLING_EVENTS	PID_PI3KPLCTRKPATHWAY	0.600819	0	1921	17	2	15
REACTOME_G_ALPHA_I_SIGNALLING_EVENTS	ST_PHOSPHOINOSITIDE_3_KINASE_PATHWAY	0.737628	0	1921	11	2	9
REACTOME_G_ALPHA_S_SIGNALLING_EVENTS	BIOCARTA_CHREBP2_PATHWAY	0.737322	0	1977	10	2	8
REACTOME_G_ALPHA_S_SIGNALLING_EVENTS	BIOCARTA_PTDINS_PATHWAY	0.696412	0	1977	7	1	6
REACTOME_G_ALPHA_Z_SIGNALLING_EVENTS	ST_PHOSPHOINOSITIDE_3_KINASE_PATHWAY	0.697144	0	2078	12	1	11
REACTOME_G_BETA_GAMMA_SIGNALLING_THROUGH_PI3KGAMMA	REACTOME_REGULATION_OF_KIT_SIGNALING	0.745455	0	1602	11	2	9
REACTOME_G_PROTEIN_ACTIVATION	BIOCARTA_PTDINS_PATHWAY	0.642723	0	1911	6	0	6
REACTOME_HDL_MEDIATED_LIPID_TRANSPORT	KEGG_WNT_SIGNALING_PATHWAY	0.637225	0	643	4	1	3
REACTOME_HDL_MEDIATED_LIPID_TRANSPORT	PID_HIF1_TFPATHWAY	0.724541	0	643	3	0	3
REACTOME_HEPARAN_SULFATE_HEPARIN_HS_GAG_METABOLISM	KEGG_MELANOGENESIS	0.648464	0	2011	28	2	26
REACTOME_HEPARAN_SULFATE_HEPARIN_HS_GAG_METABOLISM	PID_KITPATHWAY	0.608277	0	2011	21	1	20
REACTOME_HEPARAN_SULFATE_HEPARIN_HS_GAG_METABOLISM	REACTOME_CIRCADIAN_CLOCK	0.614882	0	2011	24	3	21
REACTOME_HEPARAN_SULFATE_HEPARIN_HS_GAG_METABOLISM	REACTOME_DOWNREGULATION_OF_TGF_BETA_RECEPTOR_SIGNALING	0.610631	0	2011	11	1	10
REACTOME_HOMOLOGOUS_RECOMBINATION_REPAIR_OF_REPLICATION_INDEPENDENT_DOUBLE_STRAND_BREAKS	REACTOME_REGULATION_OF_KIT_SIGNALING	0.787706	0	1745	3	0	3
REACTOME_HOST_INTERACTIONS_OF_HIV_FACTORS	PID_ECADHERIN_NASCENTAJ_PATHWAY	0.607441	0	1871	53	1	52
REACTOME_HS_GAG_BIOSYNTHESIS	BIOCARTA_GPCR_PATHWAY	0.607972	0	1910	5	0	5
REACTOME_HS_GAG_DEGRADATION	PID_HIF1_TFPATHWAY	0.684348	0	908	4	0	4
REACTOME_IL1_SIGNALING	BIOCARTA_CCR3_PATHWAY	0.699472	0	2011	14	0	14
REACTOME_IL1_SIGNALING	BIOCARTA_PTDINS_PATHWAY	0.671783	0	2011	20	1	19
REACTOME_IL1_SIGNALING	PID_NCADHERINPATHWAY	0.645513	0	2011	15	0	15
REACTOME_IL_2_SIGNALING	REACTOME_TGF_BETA_RECEPTOR_SIGNALING_ACTIVATES_SMADS	0.660331	0	2052	19	2	17
REACTOME_IL_6_SIGNALING	PID_CDC42_PATHWAY	0.607152	0	1797	23	2	21
REACTOME_IL_6_SIGNALING	PID_ECADHERIN_NASCENTAJ_PATHWAY	0.672554	0	1797	8	1	7
REACTOME_IL_6_SIGNALING	ST_PHOSPHOINOSITIDE_3_KINASE_PATHWAY	0.648576	0	1797	8	2	6
REACTOME_IL_7_SIGNALING	PID_EPHA_FWDPATHWAY	0.779928	0	1835	1	0	1
REACTOME_IL_RECEPTOR_SHC_SIGNALING	KEGG_LONG_TERM_DEPRESSION	0.607389	0	1833	5	0	5
REACTOME_IMMUNOREGULATORY_INTERACTIONS_BETWEEN_A_LYMPHOID_AND_A_NON_LYMPHOID_CELL	PID_RHOA_PATHWAY	0.660119	0	1218	6	0	6
REACTOME_INFLAMMASOMES	ST_PHOSPHOINOSITIDE_3_KINASE_PATHWAY	0.674933	0	1922	4	0	4
REACTOME_INFLUENZA_LIFE_CYCLE	BIOCARTA_TCR_PATHWAY	0.672638	0	2041	45	1	44
REACTOME_INHIBITION_OF_INSULIN_SECRETION_BY_ADRENALINE_NORADRENALINE	PID_IGF1_PATHWAY	0.623456	0	1482	7	1	6
REACTOME_INHIBITION_OF_INSULIN_SECRETION_BY_ADRENALINE_NORADRENALINE	REACTOME_SIGNALING_BY_ROBO_RECEPTOR	0.701028	0	1482	9	0	9
REACTOME_INHIBITION_OF_REPLICATION_INITIATION_OF_DAMAGED_DNA_BY_RB1_E2F1	PID_BETACATENIN_NUC_PATHWAY	0.680211	0	1394	5	1	4
REACTOME_INHIBITION_OF_REPLICATION_INITIATION_OF_DAMAGED_DNA_BY_RB1_E2F1	REACTOME_DOWNREGULATION_OF_SMAD2_3_SMAD4_TRANSCRIPTIONAL_ACTIVITY	0.710639	0	1394	6	0	6
REACTOME_INHIBITION_OF_REPLICATION_INITIATION_OF_DAMAGED_DNA_BY_RB1_E2F1	REACTOME_TRANSCRIPTIONAL_ACTIVITY_OF_SMAD2_SMAD3_SMAD4_HETEROTRIMER	0.696908	0	1394	10	1	9
REACTOME_INNATE_IMMUNE_SYSTEM	KEGG_MELANOGENESIS	0.606051	0	2041	152	11	141
REACTOME_INSULIN_SYNTHESIS_AND_PROCESSING	KEGG_LONG_TERM_DEPRESSION	0.678828	0	1777	18	3	15
REACTOME_INSULIN_SYNTHESIS_AND_PROCESSING	PID_AJDISS_2PATHWAY	0.66338	0	1777	6	2	4
REACTOME_INTEGRATION_OF_ENERGY_METABOLISM	BIOCARTA_PYK2_PATHWAY	0.640099	0	1939	26	0	26
REACTOME_INTEGRATION_OF_ENERGY_METABOLISM	BIOCARTA_RAB_PATHWAY	0.763716	0	1939	12	1	11
REACTOME_INTEGRATION_OF_ENERGY_METABOLISM	PID_CDC42_PATHWAY	0.67229	0	1939	65	3	62
REACTOME_INTEGRATION_OF_ENERGY_METABOLISM	SIG_INSULIN_RECEPTOR_PATHWAY_IN_CARDIAC_MYOCYTES	0.60933	0	1939	34	1	33
REACTOME_INTEGRATION_OF_PROVIRUS	REACTOME_MYOGENESIS	0.69375	0	1687	2	0	2
REACTOME_INTEGRIN_ALPHAIIB_BETA3_SIGNALING	PID_TGFBRPATHWAY	0.664546	0	1379	33	5	28
REACTOME_INTEGRIN_ALPHAIIB_BETA3_SIGNALING	REACTOME_OPIOID_SIGNALLING	0.660847	0	1379	23	3	20
REACTOME_INTEGRIN_ALPHAIIB_BETA3_SIGNALING	REACTOME_SIGNALING_BY_TGF_BETA_RECEPTOR_COMPLEX	0.636362	0	1379	31	6	25
REACTOME_INTEGRIN_ALPHAIIB_BETA3_SIGNALING	REACTOME_TGF_BETA_RECEPTOR_SIGNALING_ACTIVATES_SMADS	0.739262	0	1379	16	2	14
REACTOME_INTEGRIN_ALPHAIIB_BETA3_SIGNALING	REACTOME_TRANSCRIPTIONAL_ACTIVITY_OF_SMAD2_SMAD3_SMAD4_HETEROTRIMER	0.658469	0	1379	14	4	10
REACTOME_INTEGRIN_CELL_SURFACE_INTERACTIONS	PID_AR_PATHWAY	0.633948	0	1331	35	2	33
REACTOME_INTEGRIN_CELL_SURFACE_INTERACTIONS	REACTOME_TGF_BETA_RECEPTOR_SIGNALING_ACTIVATES_SMADS	0.657425	0	1331	22	2	20
REACTOME_INTERACTIONS_OF_VPR_WITH_HOST_CELLULAR_PROTEINS	BIOCARTA_TCR_PATHWAY	0.705653	0	2012	23	1	22
REACTOME_INTERFERON_ALPHA_BETA_SIGNALING	KEGG_GLIOMA	0.601688	0	1862	11	0	11
REACTOME_IONOTROPIC_ACTIVITY_OF_KAINATE_RECEPTORS	REACTOME_SIGNALING_BY_TGF_BETA_RECEPTOR_COMPLEX	0.818193	0	668	3	0	3
REACTOME_ION_CHANNEL_TRANSPORT	KEGG_GNRH_SIGNALING_PATHWAY	0.634768	0	1669	29	4	25
REACTOME_ION_CHANNEL_TRANSPORT	PID_EPHBFWDPATHWAY	0.62789	0	1669	21	0	21
REACTOME_ION_TRANSPORT_BY_P_TYPE_ATPASES	KEGG_GNRH_SIGNALING_PATHWAY	0.634768	0	1669	29	4	25
REACTOME_ION_TRANSPORT_BY_P_TYPE_ATPASES	REACTOME_MYOGENESIS	0.720359	0	1669	16	0	16
REACTOME_IRAK1_RECRUITS_IKK_COMPLEX	PID_BETACATENIN_NUC_PATHWAY	0.634185	0	920	1	0	1
REACTOME_IRAK2_MEDIATED_ACTIVATION_OF_TAK1_COMPLEX_UPON_TLR7_8_OR_9_STIMULATION	PID_AR_TF_PATHWAY	0.602138	0	1968	19	0	19
REACTOME_IRAK2_MEDIATED_ACTIVATION_OF_TAK1_COMPLEX_UPON_TLR7_8_OR_9_STIMULATION	PID_NCADHERINPATHWAY	0.653345	0	1968	8	0	8
REACTOME_IRAK2_MEDIATED_ACTIVATION_OF_TAK1_COMPLEX_UPON_TLR7_8_OR_9_STIMULATION	PID_NEPHRIN_NEPH1_PATHWAY	0.762229	0	1968	11	0	11
REACTOME_IRON_UPTAKE_AND_TRANSPORT	KEGG_ADHERENS_JUNCTION	0.604689	0	1836	22	1	21
REACTOME_IRON_UPTAKE_AND_TRANSPORT	KEGG_COLORECTAL_CANCER	0.614445	0	1836	13	0	13
REACTOME_IRON_UPTAKE_AND_TRANSPORT	KEGG_WNT_SIGNALING_PATHWAY	0.606072	0	1836	20	1	19
REACTOME_IRON_UPTAKE_AND_TRANSPORT	PID_MYC_REPRESSPATHWAY	0.639894	0	1836	10	0	10
REACTOME_IRON_UPTAKE_AND_TRANSPORT	REACTOME_OPIOID_SIGNALLING	0.662651	0	1836	11	0	11
REACTOME_JNK_C_JUN_KINASES_PHOSPHORYLATION_AND_ACTIVATION_MEDIATED_BY_ACTIVATED_HUMAN_TAK1	PID_NETRIN_PATHWAY	0.653784	0	2027	17	0	17
REACTOME_KERATAN_SULFATE_BIOSYNTHESIS	BIOCARTA_PTDINS_PATHWAY	0.630812	0	1553	4	0	4
REACTOME_KERATAN_SULFATE_KERATIN_METABOLISM	PID_INSULIN_PATHWAY	0.76318	0	1337	7	0	7
REACTOME_KERATAN_SULFATE_KERATIN_METABOLISM	REACTOME_TGF_BETA_RECEPTOR_SIGNALING_ACTIVATES_SMADS	0.654995	0	1337	6	1	5
REACTOME_KINESINS	KEGG_P53_SIGNALING_PATHWAY	0.63421	0	1834	7	2	5
REACTOME_L1CAM_INTERACTIONS	REACTOME_DOWNSTREAM_SIGNAL_TRANSDUCTION	0.636909	0	1720	86	6	80
REACTOME_LIPOPROTEIN_METABOLISM	BIOCARTA_HIF_PATHWAY	0.954456	0	849	1	0	1
REACTOME_LIPOPROTEIN_METABOLISM	KEGG_INSULIN_SIGNALING_PATHWAY	0.600681	0	849	6	1	5
REACTOME_LIPOPROTEIN_METABOLISM	PID_HIF1_TFPATHWAY	0.677802	0	849	5	0	5
REACTOME_LYSOSOME_VESICLE_BIOGENESIS	PID_ERBB1_RECEPTOR_PROXIMAL_PATHWAY	0.602913	0	1596	21	0	21
REACTOME_LYSOSOME_VESICLE_BIOGENESIS	PID_ER_NONGENOMIC_PATHWAY	0.703879	0	1596	18	2	16
REACTOME_LYSOSOME_VESICLE_BIOGENESIS	PID_FGF_PATHWAY	0.64969	0	1596	15	0	15
REACTOME_MAP_KINASE_ACTIVATION_IN_TLR_CASCADE	BIOCARTA_PTDINS_PATHWAY	0.71303	0	1929	38	4	34
REACTOME_MEMBRANE_TRAFFICKING	PID_ER_NONGENOMIC_PATHWAY	0.651199	0	2035	110	6	104
REACTOME_METABOLISM_OF_AMINO_ACIDS_AND_DERIVATIVES	BIOCARTA_CHREBP2_PATHWAY	0.684994	0	1849	21	3	18
REACTOME_METABOLISM_OF_CARBOHYDRATES	PID_AR_TF_PATHWAY	0.63332	0	1877	87	3	84
REACTOME_METABOLISM_OF_CARBOHYDRATES	PID_CDC42_PATHWAY	0.600541	0	1877	125	13	112
REACTOME_METABOLISM_OF_CARBOHYDRATES	PID_GLYPICAN_1PATHWAY	0.783305	0	1877	30	2	28
REACTOME_METABOLISM_OF_NON_CODING_RNA	SIG_CHEMOTAXIS	0.6585	0	1986	18	7	11
REACTOME_METABOLISM_OF_PROTEINS	BIOCARTA_TCR_PATHWAY	0.623734	0	1971	62	2	60
REACTOME_METABOLISM_OF_PROTEINS	PID_CDC42_PATHWAY	0.643359	0	1971	213	7	206
REACTOME_MITOCHONDRIAL_PROTEIN_IMPORT	KEGG_MELANOGENESIS	0.676353	0	968	6	1	5
REACTOME_MITOCHONDRIAL_PROTEIN_IMPORT	KEGG_UBIQUITIN_MEDIATED_PROTEOLYSIS	0.702301	0	968	11	4	7
REACTOME_MITOTIC_G2_G2_M_PHASES	KEGG_P53_SIGNALING_PATHWAY	0.612021	0	1749	25	3	22
REACTOME_MITOTIC_M_M_G1_PHASES	BIOCARTA_TCR_PATHWAY	0.636978	0	2025	48	2	46
REACTOME_MRNA_DECAY_BY_5_TO_3_EXORIBONUCLEASE	KEGG_ACUTE_MYELOID_LEUKEMIA	0.624964	0	1799	21	3	18
REACTOME_MRNA_DECAY_BY_5_TO_3_EXORIBONUCLEASE	PID_AR_TF_PATHWAY	0.605843	0	1799	36	6	30
REACTOME_MTORC1_MEDIATED_SIGNALLING	BIOCARTA_TCR_PATHWAY	0.703748	0	1803	5	0	5
REACTOME_MUSCLE_CONTRACTION	PID_CMYB_PATHWAY	0.6661	0	997	9	0	9
REACTOME_MUSCLE_CONTRACTION	REACTOME_DOWNSTREAM_SIGNALING_OF_ACTIVATED_FGFR	0.610754	0	997	6	1	5
REACTOME_MUSCLE_CONTRACTION	REACTOME_SIGNALING_BY_TGF_BETA_RECEPTOR_COMPLEX	0.642924	0	997	14	2	12
REACTOME_MYOGENESIS	REACTOME_GOLGI_ASSOCIATED_VESICLE_BIOGENESIS	0.617828	0	2018	24	2	22
REACTOME_M_G1_TRANSITION	PID_ECADHERIN_NASCENTAJ_PATHWAY	0.645044	0	1538	6	0	6
REACTOME_NEF_MEDIATED_DOWNREGULATION_OF_MHC_CLASS_I_COMPLEX_CELL_SURFACE_EXPRESSION	PID_MYC_ACTIVPATHWAY	0.648605	0	1117	8	2	6
REACTOME_NEF_MEDIATES_DOWN_MODULATION_OF_CELL_SURFACE_RECEPTORS_BY_RECRUITING_THEM_TO_CLATHRIN_ADAPTERS	PID_AJDISS_2PATHWAY	0.639194	0	1560	12	1	11
REACTOME_NEP_NS2_INTERACTS_WITH_THE_CELLULAR_EXPORT_MACHINERY	BIOCARTA_TCR_PATHWAY	0.650877	0	1998	25	1	24
REACTOME_NETRIN1_SIGNALING	PID_AR_TF_PATHWAY	0.627255	0	2077	42	2	40
REACTOME_NFKB_ACTIVATION_THROUGH_FADD_RIP1_PATHWAY_MEDIATED_BY_CASPASE_8_AND10	REACTOME_SIGNALING_BY_ROBO_RECEPTOR	0.698549	0	1423	0	0	0
REACTOME_NOREPINEPHRINE_NEUROTRANSMITTER_RELEASE_CYCLE	PID_FAK_PATHWAY	0.623444	0	1002	0	0	0
REACTOME_NOREPINEPHRINE_NEUROTRANSMITTER_RELEASE_CYCLE	PID_PDGFRBPATHWAY	0.694622	0	1002	1	0	1
REACTOME_NOTCH_HLH_TRANSCRIPTION_PATHWAY	PID_AP1_PATHWAY	0.612522	0	1941	12	0	12
REACTOME_NRAGE_SIGNALS_DEATH_THROUGH_JNK	KEGG_INSULIN_SIGNALING_PATHWAY	0.606903	0	1898	57	4	53
REACTOME_NRAGE_SIGNALS_DEATH_THROUGH_JNK	PID_IGF1_PATHWAY	0.636654	0	1898	30	0	30
REACTOME_NRAGE_SIGNALS_DEATH_THROUGH_JNK	PID_INSULIN_PATHWAY	0.687278	0	1898	34	3	31
REACTOME_NUCLEAR_RECEPTOR_TRANSCRIPTION_PATHWAY	BIOCARTA_PTDINS_PATHWAY	0.661385	0	2006	9	0	9
REACTOME_NUCLEAR_RECEPTOR_TRANSCRIPTION_PATHWAY	BIOCARTA_TCR_PATHWAY	0.703423	0	2006	10	0	10
REACTOME_NUCLEAR_RECEPTOR_TRANSCRIPTION_PATHWAY	BIOCARTA_TOB1_PATHWAY	0.802049	0	2006	5	1	4
REACTOME_NUCLEAR_RECEPTOR_TRANSCRIPTION_PATHWAY	PID_KITPATHWAY	0.635116	0	2006	19	1	18
REACTOME_NUCLEAR_SIGNALING_BY_ERBB4	PID_NETRIN_PATHWAY	0.681186	0	1929	15	0	15
REACTOME_NUCLEOTIDE_BINDING_DOMAIN_LEUCINE_RICH_REPEAT_CONTAINING_RECEPTOR_NLR_SIGNALING_PATHWAYS	KEGG_MELANOGENESIS	0.619475	0	2153	50	0	50
REACTOME_NUCLEOTIDE_EXCISION_REPAIR	KEGG_ADHERENS_JUNCTION	0.640065	0	1498	8	0	8
REACTOME_N_GLYCAN_ANTENNAE_ELONGATION_IN_THE_MEDIAL_TRANS_GOLGI	BIOCARTA_TGFB_PATHWAY	0.610055	0	1907	9	0	9
REACTOME_N_GLYCAN_TRIMMING_IN_THE_ER_AND_CALNEXIN_CALRETICULIN_CYCLE	BIOCARTA_MET_PATHWAY	0.641115	0	2146	18	1	17
REACTOME_N_GLYCAN_TRIMMING_IN_THE_ER_AND_CALNEXIN_CALRETICULIN_CYCLE	BIOCARTA_PTDINS_PATHWAY	0.606015	0	2146	15	1	14
REACTOME_N_GLYCAN_TRIMMING_IN_THE_ER_AND_CALNEXIN_CALRETICULIN_CYCLE	KEGG_ADHERENS_JUNCTION	0.696687	0	2146	30	0	30
REACTOME_N_GLYCAN_TRIMMING_IN_THE_ER_AND_CALNEXIN_CALRETICULIN_CYCLE	KEGG_MELANOGENESIS	0.608227	0	2146	30	0	30
REACTOME_N_GLYCAN_TRIMMING_IN_THE_ER_AND_CALNEXIN_CALRETICULIN_CYCLE	PID_ERBB1_RECEPTOR_PROXIMAL_PATHWAY	0.605308	0	2146	24	0	24
REACTOME_N_GLYCAN_TRIMMING_IN_THE_ER_AND_CALNEXIN_CALRETICULIN_CYCLE	PID_NETRIN_PATHWAY	0.718557	0	2146	13	0	13
REACTOME_OPIOID_SIGNALLING	BIOCARTA_PTDINS_PATHWAY	0.722181	0	1943	32	4	28
REACTOME_OPIOID_SIGNALLING	PID_CDC42_PATHWAY	0.609601	0	1943	94	11	83
REACTOME_ORC1_REMOVAL_FROM_CHROMATIN	KEGG_ADHERENS_JUNCTION	0.687887	0	1500	10	1	9
REACTOME_ORC1_REMOVAL_FROM_CHROMATIN	PID_HIF1_TFPATHWAY	0.629671	0	1500	6	0	6
REACTOME_ORC1_REMOVAL_FROM_CHROMATIN	PID_IL6_7PATHWAY	0.627329	0	1500	6	1	5
REACTOME_ORC1_REMOVAL_FROM_CHROMATIN	PID_PI3KCIPATHWAY	0.634763	0	1500	5	1	4
REACTOME_ORC1_REMOVAL_FROM_CHROMATIN	REACTOME_CTLA4_INHIBITORY_SIGNALING	0.825172	0	1500	5	1	4
REACTOME_ORC1_REMOVAL_FROM_CHROMATIN	SIG_PIP3_SIGNALING_IN_CARDIAC_MYOCTES	0.604132	0	1500	6	1	5
REACTOME_OTHER_SEMAPHORIN_INTERACTIONS	REACTOME_PI3K_CASCADE	0.724118	0	1498	5	0	5
REACTOME_OXYGEN_DEPENDENT_PROLINE_HYDROXYLATION_OF_HYPOXIA_INDUCIBLE_FACTOR_ALPHA	REACTOME_MYOGENESIS	0.808146	0	890	5	0	5
REACTOME_O_LINKED_GLYCOSYLATION_OF_MUCINS	PID_SMAD2_3PATHWAY	0.662172	0	1984	15	0	15
REACTOME_P130CAS_LINKAGE_TO_MAPK_SIGNALING_FOR_INTEGRINS	KEGG_ADHERENS_JUNCTION	0.661873	0	922	22	0	22
REACTOME_P130CAS_LINKAGE_TO_MAPK_SIGNALING_FOR_INTEGRINS	REACTOME_DOWNSTREAM_SIGNAL_TRANSDUCTION	0.639807	0	922	8	0	8
REACTOME_P130CAS_LINKAGE_TO_MAPK_SIGNALING_FOR_INTEGRINS	REACTOME_NGF_SIGNALLING_VIA_TRKA_FROM_THE_PLASMA_MEMBRANE	0.606201	0	922	18	1	17
REACTOME_P130CAS_LINKAGE_TO_MAPK_SIGNALING_FOR_INTEGRINS	REACTOME_SIGNALING_BY_EGFR_IN_CANCER	0.614237	0	922	12	0	12
REACTOME_P130CAS_LINKAGE_TO_MAPK_SIGNALING_FOR_INTEGRINS	REACTOME_SIGNALING_BY_ERBB2	0.610272	0	922	11	0	11
REACTOME_P130CAS_LINKAGE_TO_MAPK_SIGNALING_FOR_INTEGRINS	REACTOME_SIGNALING_BY_FGFR	0.628267	0	922	9	1	8
REACTOME_P130CAS_LINKAGE_TO_MAPK_SIGNALING_FOR_INTEGRINS	REACTOME_SIGNALING_BY_FGFR_IN_DISEASE	0.65879	0	922	11	1	10
REACTOME_P53_DEPENDENT_G1_DNA_DAMAGE_RESPONSE	PID_VEGFR1_PATHWAY	0.721324	0	1569	6	0	6
REACTOME_P53_INDEPENDENT_G1_S_DNA_DAMAGE_CHECKPOINT	BIOCARTA_AT1R_PATHWAY	0.726161	0	1158	8	1	7
REACTOME_P75_NTR_RECEPTOR_MEDIATED_SIGNALLING	KEGG_WNT_SIGNALING_PATHWAY	0.648711	0	1808	95	10	85
REACTOME_PECAM1_INTERACTIONS	SIG_CHEMOTAXIS	0.612629	0	2007	8	0	8
REACTOME_PERK_REGULATED_GENE_EXPRESSION	PID_VEGFR1_PATHWAY	0.683498	0	2020	13	1	12
REACTOME_PEROXISOMAL_LIPID_METABOLISM	PID_BETACATENIN_NUC_PATHWAY	0.653422	0	1645	6	0	6
REACTOME_PEROXISOMAL_LIPID_METABOLISM	REACTOME_TGF_BETA_RECEPTOR_SIGNALING_ACTIVATES_SMADS	0.685242	0	1645	7	1	6
REACTOME_PHOSPHOLIPASE_C_MEDIATED_CASCADE	BIOCARTA_CCR3_PATHWAY	0.780085	0	2057	11	1	10
REACTOME_PHOSPHOLIPASE_C_MEDIATED_CASCADE	PID_ER_NONGENOMIC_PATHWAY	0.635089	0	2057	25	2	23
REACTOME_PHOSPHOLIPID_METABOLISM	BIOCARTA_PYK2_PATHWAY	0.613696	0	2088	81	9	72
REACTOME_PHOSPHOLIPID_METABOLISM	BIOCARTA_TCR_PATHWAY	0.658522	0	2088	70	2	68
REACTOME_PHOSPHOLIPID_METABOLISM	KEGG_MELANOGENESIS	0.638761	0	2088	162	16	146
REACTOME_PHOSPHOLIPID_METABOLISM	PID_ER_NONGENOMIC_PATHWAY	0.655643	0	2088	121	12	109
REACTOME_PI3K_AKT_ACTIVATION	KEGG_ADHERENS_JUNCTION	0.620794	0	1830	49	7	42
REACTOME_PI3K_CASCADE	KEGG_MELANOGENESIS	0.661359	0	2057	67	7	60
REACTOME_PI3K_CASCADE	REACTOME_OPIOID_SIGNALLING	0.617981	0	2057	36	8	28
REACTOME_PIP3_ACTIVATES_AKT_SIGNALING	PID_CDC42_PATHWAY	0.609329	0	1809	49	8	41
REACTOME_PI_METABOLISM	KEGG_ADHERENS_JUNCTION	0.641489	0	2078	102	10	92
REACTOME_PI_METABOLISM	KEGG_MELANOGENESIS	0.620885	0	2078	79	12	67
REACTOME_PKA_MEDIATED_PHOSPHORYLATION_OF_CREB	REACTOME_DOWNREGULATION_OF_SMAD2_3_SMAD4_TRANSCRIPTIONAL_ACTIVITY	0.648293	0	2084	8	1	7
REACTOME_PKA_MEDIATED_PHOSPHORYLATION_OF_CREB	REACTOME_GOLGI_ASSOCIATED_VESICLE_BIOGENESIS	0.62392	0	2084	24	4	20
REACTOME_PLATELET_ADHESION_TO_EXPOSED_COLLAGEN	PID_INSULIN_GLUCOSE_PATHWAY	0.80654	0	861	4	0	4
REACTOME_PLATELET_ADHESION_TO_EXPOSED_COLLAGEN	PID_PI3KCIAKTPATHWAY	0.760951	0	861	2	1	1
REACTOME_PLATELET_ADHESION_TO_EXPOSED_COLLAGEN	REACTOME_SIGNALING_BY_TGF_BETA_RECEPTOR_COMPLEX	0.678115	0	861	5	1	4
REACTOME_PLATELET_AGGREGATION_PLUG_FORMATION	PID_TGFBRPATHWAY	0.664546	0	1379	33	5	28
REACTOME_PLATELET_AGGREGATION_PLUG_FORMATION	REACTOME_DOWNREGULATION_OF_TGF_BETA_RECEPTOR_SIGNALING	0.706378	0	1379	14	2	12
REACTOME_PLATELET_AGGREGATION_PLUG_FORMATION	REACTOME_OPIOID_SIGNALLING	0.660847	0	1379	23	3	20
REACTOME_PLATELET_AGGREGATION_PLUG_FORMATION	REACTOME_SIGNALING_BY_TGF_BETA_RECEPTOR_COMPLEX	0.636362	0	1379	31	6	25
REACTOME_PLATELET_AGGREGATION_PLUG_FORMATION	REACTOME_TGF_BETA_RECEPTOR_SIGNALING_ACTIVATES_SMADS	0.739262	0	1379	16	2	14
REACTOME_PLATELET_AGGREGATION_PLUG_FORMATION	REACTOME_TRANSCRIPTIONAL_ACTIVITY_OF_SMAD2_SMAD3_SMAD4_HETEROTRIMER	0.658469	0	1379	14	4	10
REACTOME_PLATELET_SENSITIZATION_BY_LDL	KEGG_ADHERENS_JUNCTION	0.674948	0	1701	23	0	23
REACTOME_PLATELET_SENSITIZATION_BY_LDL	REACTOME_DOWNREGULATION_OF_SMAD2_3_SMAD4_TRANSCRIPTIONAL_ACTIVITY	0.65566	0	1701	12	0	12
REACTOME_POST_TRANSLATIONAL_PROTEIN_MODIFICATION	BIOCARTA_PTDINS_PATHWAY	0.616927	0	2122	44	1	43
REACTOME_POST_TRANSLATIONAL_PROTEIN_MODIFICATION	PID_NETRIN_PATHWAY	0.61361	0	2122	53	1	52
REACTOME_PPARA_ACTIVATES_GENE_EXPRESSION	REACTOME_DOWNSTREAM_SIGNALING_OF_ACTIVATED_FGFR	0.612831	0	2008	123	16	107
REACTOME_PROTEOLYTIC_CLEAVAGE_OF_SNARE_COMPLEX_PROTEINS	BIOCARTA_GPCR_PATHWAY	0.70613	0	2069	7	0	7
REACTOME_PTM_GAMMA_CARBOXYLATION_HYPUSINE_FORMATION_AND_ARYLSULFATASE_ACTIVATION	KEGG_AXON_GUIDANCE	0.625347	0	955	5	0	5
REACTOME_PYRUVATE_METABOLISM_AND_CITRIC_ACID_TCA_CYCLE	PID_SMAD2_3NUCLEARPATHWAY	0.772083	0	863	15	1	14
REACTOME_PYRUVATE_METABOLISM_AND_CITRIC_ACID_TCA_CYCLE	REACTOME_SIGNALING_BY_ERBB2	0.620161	0	863	16	3	13
REACTOME_PYRUVATE_METABOLISM_AND_CITRIC_ACID_TCA_CYCLE	REACTOME_SIGNALING_BY_FGFR_IN_DISEASE	0.632682	0	863	15	1	14
REACTOME_RAF_MAP_KINASE_CASCADE	KEGG_VASOPRESSIN_REGULATED_WATER_REABSORPTION	0.61784	0	2022	15	2	13
REACTOME_RAF_MAP_KINASE_CASCADE	REACTOME_OPIOID_SIGNALLING	0.660579	0	2022	16	4	12
REACTOME_RAF_MAP_KINASE_CASCADE	REACTOME_TGF_BETA_RECEPTOR_SIGNALING_ACTIVATES_SMADS	0.621949	0	2022	13	0	13
REACTOME_RAP1_SIGNALLING	PID_TGFBRPATHWAY	0.61701	0	1420	10	1	9
REACTOME_RAS_ACTIVATION_UOPN_CA2_INFUX_THROUGH_NMDA_RECEPTOR	REACTOME_GOLGI_ASSOCIATED_VESICLE_BIOGENESIS	0.600182	0	894	3	0	3
REACTOME_REGULATION_OF_AMPK_ACTIVITY_VIA_LKB1	BIOCARTA_AT1R_PATHWAY	0.756617	0	1584	13	1	12
REACTOME_REGULATION_OF_AMPK_ACTIVITY_VIA_LKB1	BIOCARTA_PGC1A_PATHWAY	0.851011	0	1584	8	0	8
REACTOME_REGULATION_OF_AMPK_ACTIVITY_VIA_LKB1	KEGG_VASOPRESSIN_REGULATED_WATER_REABSORPTION	0.643025	0	1584	11	2	9
REACTOME_REGULATION_OF_AMPK_ACTIVITY_VIA_LKB1	REACTOME_TGF_BETA_RECEPTOR_SIGNALING_ACTIVATES_SMADS	0.664015	0	1584	5	0	5
REACTOME_REGULATION_OF_APOPTOSIS	KEGG_GLIOMA	0.695016	0	1664	17	2	15
REACTOME_REGULATION_OF_APOPTOSIS	KEGG_LONG_TERM_POTENTIATION	0.664148	0	1664	19	6	13
REACTOME_REGULATION_OF_APOPTOSIS	PID_EPHBFWDPATHWAY	0.63077	0	1664	20	1	19
REACTOME_REGULATION_OF_BETA_CELL_DEVELOPMENT	BIOCARTA_MET_PATHWAY	0.648612	0	1279	6	0	6
REACTOME_REGULATION_OF_BETA_CELL_DEVELOPMENT	PID_RET_PATHWAY	0.646011	0	1279	6	0	6
REACTOME_REGULATION_OF_GLUCOKINASE_BY_GLUCOKINASE_REGULATORY_PROTEIN	BIOCARTA_TCR_PATHWAY	0.668365	0	2003	22	1	21
REACTOME_REGULATION_OF_GLUCOKINASE_BY_GLUCOKINASE_REGULATORY_PROTEIN	SIG_CHEMOTAXIS	0.638242	0	2003	16	7	9
REACTOME_REGULATION_OF_HYPOXIA_INDUCIBLE_FACTOR_HIF_BY_OXYGEN	BIOCARTA_AT1R_PATHWAY	0.825721	0	1116	10	2	8
REACTOME_REGULATION_OF_HYPOXIA_INDUCIBLE_FACTOR_HIF_BY_OXYGEN	BIOCARTA_MAPK_PATHWAY	0.654914	0	1116	23	5	18
REACTOME_REGULATION_OF_HYPOXIA_INDUCIBLE_FACTOR_HIF_BY_OXYGEN	KEGG_OOCYTE_MEIOSIS	0.637819	0	1116	19	5	14
REACTOME_REGULATION_OF_HYPOXIA_INDUCIBLE_FACTOR_HIF_BY_OXYGEN	PID_P53DOWNSTREAMPATHWAY	0.616242	0	1116	20	3	17
REACTOME_REGULATION_OF_HYPOXIA_INDUCIBLE_FACTOR_HIF_BY_OXYGEN	REACTOME_MYOGENESIS	0.82139	0	1116	10	1	9
REACTOME_REGULATION_OF_HYPOXIA_INDUCIBLE_FACTOR_HIF_BY_OXYGEN	SIG_PIP3_SIGNALING_IN_CARDIAC_MYOCTES	0.802717	0	1116	7	4	3
REACTOME_REGULATION_OF_HYPOXIA_INDUCIBLE_FACTOR_HIF_BY_OXYGEN	ST_PHOSPHOINOSITIDE_3_KINASE_PATHWAY	0.853436	0	1116	4	3	1
REACTOME_REGULATION_OF_IFNA_SIGNALING	REACTOME_SIGNALING_BY_ROBO_RECEPTOR	0.680804	0	1478	5	0	5
REACTOME_REGULATION_OF_INSULIN_LIKE_GROWTH_FACTOR_IGF_ACTIVITY_BY_INSULIN_LIKE_GROWTH_FACTOR_BINDING_PROTEINS_IGFBPS	BIOCARTA_PYK2_PATHWAY	0.878705	0	830	0	0	0
REACTOME_REGULATION_OF_INSULIN_LIKE_GROWTH_FACTOR_IGF_ACTIVITY_BY_INSULIN_LIKE_GROWTH_FACTOR_BINDING_PROTEINS_IGFBPS	KEGG_COLORECTAL_CANCER	0.65224	0	830	0	0	0
REACTOME_REGULATION_OF_INSULIN_LIKE_GROWTH_FACTOR_IGF_ACTIVITY_BY_INSULIN_LIKE_GROWTH_FACTOR_BINDING_PROTEINS_IGFBPS	PID_FAK_PATHWAY	0.604682	0	830	0	0	0
REACTOME_REGULATION_OF_INSULIN_SECRETION	PID_IGF1_PATHWAY	0.606305	0	2089	23	2	21
REACTOME_REGULATION_OF_INSULIN_SECRETION_BY_GLUCAGON_LIKE_PEPTIDE1	REACTOME_SIGNALING_BY_HIPPO	0.695784	0	1791	9	0	9
REACTOME_REGULATION_OF_ORNITHINE_DECARBOXYLASE_ODC	KEGG_MTOR_SIGNALING_PATHWAY	0.602181	0	1349	8	0	8
REACTOME_REGULATION_OF_ORNITHINE_DECARBOXYLASE_ODC	PID_CDC42_PATHWAY	0.610167	0	1349	17	2	15
REACTOME_REGULATION_OF_ORNITHINE_DECARBOXYLASE_ODC	PID_NFAT_3PATHWAY	0.602705	0	1349	9	3	6
REACTOME_REGULATION_OF_ORNITHINE_DECARBOXYLASE_ODC	REACTOME_REGULATION_OF_KIT_SIGNALING	0.83974	0	1349	3	2	1
REACTOME_REGULATION_OF_PYRUVATE_DEHYDROGENASE_PDH_COMPLEX	KEGG_P53_SIGNALING_PATHWAY	0.643046	0	1374	4	0	4
REACTOME_REGULATION_OF_RHEB_GTPASE_ACTIVITY_BY_AMPK	KEGG_VASOPRESSIN_REGULATED_WATER_REABSORPTION	0.679914	0	1439	10	0	10
REACTOME_REGULATION_OF_WATER_BALANCE_BY_RENAL_AQUAPORINS	PID_NETRIN_PATHWAY	0.616759	0	2239	19	2	17
REACTOME_RESPONSE_TO_ELEVATED_PLATELET_CYTOSOLIC_CA2_	PID_AJDISS_2PATHWAY	0.70124	0	1694	29	0	29
REACTOME_RESPONSE_TO_ELEVATED_PLATELET_CYTOSOLIC_CA2_	PID_ECADHERIN_NASCENTAJ_PATHWAY	0.670126	0	1694	34	0	34
REACTOME_RESPONSE_TO_ELEVATED_PLATELET_CYTOSOLIC_CA2_	PID_FGF_PATHWAY	0.694125	0	1694	22	0	22
REACTOME_RESPONSE_TO_ELEVATED_PLATELET_CYTOSOLIC_CA2_	PID_IGF1_PATHWAY	0.637191	0	1694	22	1	21
REACTOME_RESPONSE_TO_ELEVATED_PLATELET_CYTOSOLIC_CA2_	PID_NCADHERINPATHWAY	0.73416	0	1694	26	0	26
REACTOME_RETROGRADE_NEUROTROPHIN_SIGNALLING	BIOCARTA_HER2_PATHWAY	0.63706	0	2110	6	1	5
REACTOME_RETROGRADE_NEUROTROPHIN_SIGNALLING	PID_LIS1PATHWAY	0.700425	0	2110	5	0	5
REACTOME_RETROGRADE_NEUROTROPHIN_SIGNALLING	PID_RET_PATHWAY	0.605578	0	2110	9	0	9
REACTOME_RNA_POL_III_CHAIN_ELONGATION	KEGG_TGF_BETA_SIGNALING_PATHWAY	0.688738	0	1166	2	0	2
REACTOME_RNA_POL_III_CHAIN_ELONGATION	REACTOME_G_ALPHA1213_SIGNALLING_EVENTS	0.64922	0	1166	3	0	3
REACTOME_RNA_POL_III_TRANSCRIPTION	BIOCARTA_TCR_PATHWAY	0.684932	0	1977	7	0	7
REACTOME_RNA_POL_III_TRANSCRIPTION_INITIATION_FROM_TYPE_2_PROMOTER	PID_AVB3_INTEGRIN_PATHWAY	0.64406	0	1395	1	0	1
REACTOME_RNA_POL_III_TRANSCRIPTION_INITIATION_FROM_TYPE_2_PROMOTER	PID_ECADHERIN_KERATINOCYTE_PATHWAY	0.703567	0	1395	1	0	1
REACTOME_RNA_POL_III_TRANSCRIPTION_INITIATION_FROM_TYPE_3_PROMOTER	BIOCARTA_RACCYCD_PATHWAY	0.619996	0	1823	1	0	1
REACTOME_RNA_POL_III_TRANSCRIPTION_INITIATION_FROM_TYPE_3_PROMOTER	PID_NCADHERINPATHWAY	0.641687	0	1823	0	0	0
REACTOME_RNA_POL_III_TRANSCRIPTION_INITIATION_FROM_TYPE_3_PROMOTER	REACTOME_G_ALPHA1213_SIGNALLING_EVENTS	0.652299	0	1823	6	0	6
REACTOME_RNA_POL_I_PROMOTER_OPENING	KEGG_NEUROTROPHIN_SIGNALING_PATHWAY	0.603087	0	1439	7	0	7
REACTOME_RNA_POL_I_PROMOTER_OPENING	KEGG_RENAL_CELL_CARCINOMA	0.781139	0	1439	3	0	3
REACTOME_RNA_POL_I_PROMOTER_OPENING	KEGG_WNT_SIGNALING_PATHWAY	0.639716	0	1439	5	0	5
REACTOME_RNA_POL_I_PROMOTER_OPENING	PID_TRKRPATHWAY	0.708145	0	1439	3	0	3
REACTOME_RNA_POL_I_PROMOTER_OPENING	REACTOME_G_ALPHA1213_SIGNALLING_EVENTS	0.733214	0	1439	2	0	2
REACTOME_RNA_POL_I_RNA_POL_III_AND_MITOCHONDRIAL_TRANSCRIPTION	PID_RAC1_PATHWAY	0.659795	0	1919	18	0	18
REACTOME_ROLE_OF_SECOND_MESSENGERS_IN_NETRIN1_SIGNALING	PID_IGF1_PATHWAY	0.706714	0	1697	3	0	3
REACTOME_SCF_BETA_TRCP_MEDIATED_DEGRADATION_OF_EMI1	KEGG_RENAL_CELL_CARCINOMA	0.600221	0	988	7	1	6
REACTOME_SCF_BETA_TRCP_MEDIATED_DEGRADATION_OF_EMI1	REACTOME_SIGNALING_BY_SCF_KIT	0.674151	0	988	10	2	8
REACTOME_SEMA3A_PAK_DEPENDENT_AXON_REPULSION	PID_ECADHERIN_NASCENTAJ_PATHWAY	0.6114	0	1476	18	0	18
REACTOME_SEMA3A_PAK_DEPENDENT_AXON_REPULSION	PID_INSULIN_PATHWAY	0.670075	0	1476	20	1	19
REACTOME_SEMA3A_PLEXIN_REPULSION_SIGNALING_BY_INHIBITING_INTEGRIN_ADHESION	BIOCARTA_RAB_PATHWAY	0.84681	0	1062	1	0	1
REACTOME_SEMA3A_PLEXIN_REPULSION_SIGNALING_BY_INHIBITING_INTEGRIN_ADHESION	KEGG_INSULIN_SIGNALING_PATHWAY	0.623372	0	1062	15	3	12
REACTOME_SEMA3A_PLEXIN_REPULSION_SIGNALING_BY_INHIBITING_INTEGRIN_ADHESION	KEGG_NEUROTROPHIN_SIGNALING_PATHWAY	0.608058	0	1062	28	2	26
REACTOME_SEMA3A_PLEXIN_REPULSION_SIGNALING_BY_INHIBITING_INTEGRIN_ADHESION	PID_CMYB_PATHWAY	0.721704	0	1062	14	2	12
REACTOME_SEMA3A_PLEXIN_REPULSION_SIGNALING_BY_INHIBITING_INTEGRIN_ADHESION	PID_FAK_PATHWAY	0.664191	0	1062	35	4	31
REACTOME_SEMA3A_PLEXIN_REPULSION_SIGNALING_BY_INHIBITING_INTEGRIN_ADHESION	PID_MET_PATHWAY	0.626074	0	1062	22	2	20
REACTOME_SEMA3A_PLEXIN_REPULSION_SIGNALING_BY_INHIBITING_INTEGRIN_ADHESION	PID_PDGFRBPATHWAY	0.601891	0	1062	27	3	24
REACTOME_SEMA3A_PLEXIN_REPULSION_SIGNALING_BY_INHIBITING_INTEGRIN_ADHESION	PID_VEGFR1_2_PATHWAY	0.604994	0	1062	16	1	15
REACTOME_SEMA3A_PLEXIN_REPULSION_SIGNALING_BY_INHIBITING_INTEGRIN_ADHESION	REACTOME_DOWNSTREAM_SIGNALING_OF_ACTIVATED_FGFR	0.7235	0	1062	11	2	9
REACTOME_SEMA3A_PLEXIN_REPULSION_SIGNALING_BY_INHIBITING_INTEGRIN_ADHESION	REACTOME_DOWNSTREAM_SIGNAL_TRANSDUCTION	0.674432	0	1062	11	2	9
REACTOME_SEMA3A_PLEXIN_REPULSION_SIGNALING_BY_INHIBITING_INTEGRIN_ADHESION	REACTOME_NGF_SIGNALLING_VIA_TRKA_FROM_THE_PLASMA_MEMBRANE	0.61243	0	1062	18	4	14
REACTOME_SEMA3A_PLEXIN_REPULSION_SIGNALING_BY_INHIBITING_INTEGRIN_ADHESION	REACTOME_SIGNALING_BY_EGFR_IN_CANCER	0.661904	0	1062	16	3	13
REACTOME_SEMA3A_PLEXIN_REPULSION_SIGNALING_BY_INHIBITING_INTEGRIN_ADHESION	REACTOME_SIGNALING_BY_ERBB2	0.735537	0	1062	15	2	13
REACTOME_SEMA3A_PLEXIN_REPULSION_SIGNALING_BY_INHIBITING_INTEGRIN_ADHESION	REACTOME_SIGNALING_BY_FGFR	0.712949	0	1062	11	2	9
REACTOME_SEMA3A_PLEXIN_REPULSION_SIGNALING_BY_INHIBITING_INTEGRIN_ADHESION	REACTOME_SIGNALING_BY_FGFR_IN_DISEASE	0.726297	0	1062	12	2	10
REACTOME_SEMA3A_PLEXIN_REPULSION_SIGNALING_BY_INHIBITING_INTEGRIN_ADHESION	REACTOME_SIGNALING_BY_PDGF	0.703271	0	1062	15	2	13
REACTOME_SEMA3A_PLEXIN_REPULSION_SIGNALING_BY_INHIBITING_INTEGRIN_ADHESION	SIG_INSULIN_RECEPTOR_PATHWAY_IN_CARDIAC_MYOCYTES	0.719776	0	1062	12	2	10
REACTOME_SEMA4D_INDUCED_CELL_MIGRATION_AND_GROWTH_CONE_COLLAPSE	BIOCARTA_RAB_PATHWAY	0.76125	0	1422	9	0	9
REACTOME_SEMA4D_INDUCED_CELL_MIGRATION_AND_GROWTH_CONE_COLLAPSE	KEGG_VASOPRESSIN_REGULATED_WATER_REABSORPTION	0.62151	0	1422	17	2	15
REACTOME_SEMA4D_INDUCED_CELL_MIGRATION_AND_GROWTH_CONE_COLLAPSE	PID_FGF_PATHWAY	0.837001	0	1422	25	8	17
REACTOME_SEMA4D_INDUCED_CELL_MIGRATION_AND_GROWTH_CONE_COLLAPSE	SIG_INSULIN_RECEPTOR_PATHWAY_IN_CARDIAC_MYOCYTES	0.621119	0	1422	19	4	15
REACTOME_SEMA4D_IN_SEMAPHORIN_SIGNALING	KEGG_VASOPRESSIN_REGULATED_WATER_REABSORPTION	0.667165	0	1592	17	2	15
REACTOME_SEMA4D_IN_SEMAPHORIN_SIGNALING	PID_IGF1_PATHWAY	0.7056	0	1592	16	3	13
REACTOME_SEMA4D_IN_SEMAPHORIN_SIGNALING	PID_KITPATHWAY	0.695925	0	1592	26	7	19
REACTOME_SEMA4D_IN_SEMAPHORIN_SIGNALING	SIG_INSULIN_RECEPTOR_PATHWAY_IN_CARDIAC_MYOCYTES	0.604409	0	1592	20	5	15
REACTOME_SEMAPHORIN_INTERACTIONS	PID_KITPATHWAY	0.644229	0	1621	47	9	38
REACTOME_SHC1_EVENTS_IN_EGFR_SIGNALING	KEGG_VASOPRESSIN_REGULATED_WATER_REABSORPTION	0.600799	0	1960	17	2	15
REACTOME_SHC1_EVENTS_IN_ERBB4_SIGNALING	KEGG_VASOPRESSIN_REGULATED_WATER_REABSORPTION	0.600799	0	1960	17	2	15
REACTOME_SHC_MEDIATED_CASCADE	BIOCARTA_PTDINS_PATHWAY	0.735916	0	1959	10	0	10
REACTOME_SHC_MEDIATED_CASCADE	KEGG_MELANOGENESIS	0.602276	0	1959	20	1	19
REACTOME_SHC_MEDIATED_CASCADE	PID_KITPATHWAY	0.647468	0	1959	21	1	20
REACTOME_SHC_MEDIATED_CASCADE	PID_RET_PATHWAY	0.616671	0	1959	10	1	9
REACTOME_SHC_MEDIATED_SIGNALLING	KEGG_VASOPRESSIN_REGULATED_WATER_REABSORPTION	0.600799	0	1960	17	2	15
REACTOME_SHC_RELATED_EVENTS	KEGG_VASOPRESSIN_REGULATED_WATER_REABSORPTION	0.600799	0	1960	17	2	15
REACTOME_SIGNALING_BY_BMP	PID_AJDISS_2PATHWAY	0.611892	0	2012	22	3	19
REACTOME_SIGNALING_BY_FGFR_MUTANTS	KEGG_MELANOGENESIS	0.60148	0	2120	59	3	56
REACTOME_SIGNALING_BY_HIPPO	PID_IGF1_PATHWAY	0.602234	0	2023	24	2	22
REACTOME_SIGNALING_BY_RHO_GTPASES	REACTOME_DOWNREGULATION_OF_TGF_BETA_RECEPTOR_SIGNALING	0.697306	0	1737	44	6	38
REACTOME_SIGNALING_BY_RHO_GTPASES	REACTOME_TGF_BETA_RECEPTOR_SIGNALING_ACTIVATES_SMADS	0.692706	0	1737	57	6	51
REACTOME_SIGNALING_BY_ROBO_RECEPTOR	PID_PI3KPLCTRKPATHWAY	0.612389	0	1859	31	3	28
REACTOME_SIGNALING_BY_TGF_BETA_RECEPTOR_COMPLEX	BIOCARTA_AT1R_PATHWAY	0.638641	0	2060	63	6	57
REACTOME_SIGNALING_BY_WNT	PID_ECADHERIN_NASCENTAJ_PATHWAY	0.650355	0	1681	22	0	22
REACTOME_SIGNALLING_TO_P38_VIA_RIT_AND_RIN	KEGG_VASOPRESSIN_REGULATED_WATER_REABSORPTION	0.61784	0	2022	15	2	13
REACTOME_SIGNALLING_TO_P38_VIA_RIT_AND_RIN	REACTOME_OPIOID_SIGNALLING	0.660579	0	2022	16	4	12
REACTOME_SIGNALLING_TO_P38_VIA_RIT_AND_RIN	REACTOME_TGF_BETA_RECEPTOR_SIGNALING_ACTIVATES_SMADS	0.621949	0	2022	13	0	13
REACTOME_SIGNAL_AMPLIFICATION	BIOCARTA_PTDINS_PATHWAY	0.647917	0	2100	11	0	11
REACTOME_SIGNAL_AMPLIFICATION	PID_ERBB1_RECEPTOR_PROXIMAL_PATHWAY	0.603201	0	2100	29	0	29
REACTOME_SIGNAL_AMPLIFICATION	REACTOME_REGULATION_OF_KIT_SIGNALING	0.715845	0	2100	9	1	8
REACTOME_SIGNAL_ATTENUATION	REACTOME_SIGNALING_BY_HIPPO	0.667093	0	1722	9	0	9
REACTOME_SIGNAL_ATTENUATION	REACTOME_SIGNALING_BY_TGF_BETA_RECEPTOR_COMPLEX	0.68225	0	1722	12	4	8
REACTOME_SIGNAL_ATTENUATION	REACTOME_TGF_BETA_RECEPTOR_SIGNALING_ACTIVATES_SMADS	0.660916	0	1722	6	2	4
REACTOME_SIGNAL_ATTENUATION	REACTOME_TRANSCRIPTIONAL_ACTIVITY_OF_SMAD2_SMAD3_SMAD4_HETEROTRIMER	0.682901	0	1722	8	2	6
REACTOME_SIGNAL_REGULATORY_PROTEIN_SIRP_FAMILY_INTERACTIONS	PID_AJDISS_2PATHWAY	0.610075	0	1723	8	0	8
REACTOME_SLC_MEDIATED_TRANSMEMBRANE_TRANSPORT	BIOCARTA_TCR_PATHWAY	0.614347	0	2066	60	2	58
REACTOME_SLC_MEDIATED_TRANSMEMBRANE_TRANSPORT	PID_NETRIN_PATHWAY	0.627638	0	2066	78	5	73
REACTOME_SMOOTH_MUSCLE_CONTRACTION	PID_NOTCH_PATHWAY	0.808837	0	1070	5	0	5
REACTOME_SPHINGOLIPID_DE_NOVO_BIOSYNTHESIS	KEGG_ADHERENS_JUNCTION	0.603063	0	2042	35	0	35
REACTOME_SPHINGOLIPID_DE_NOVO_BIOSYNTHESIS	PID_GLYPICAN_1PATHWAY	0.626549	0	2042	11	0	11
REACTOME_SPHINGOLIPID_METABOLISM	BIOCARTA_CHREBP2_PATHWAY	0.699842	0	1955	16	1	15
REACTOME_SPHINGOLIPID_METABOLISM	KEGG_ADHERENS_JUNCTION	0.606897	0	1955	35	0	35
REACTOME_SPHINGOLIPID_METABOLISM	REACTOME_TGF_BETA_RECEPTOR_SIGNALING_ACTIVATES_SMADS	0.602167	0	1955	11	0	11
REACTOME_SYNTHESIS_AND_INTERCONVERSION_OF_NUCLEOTIDE_DI_AND_TRIPHOSPHATES	PID_BETACATENIN_NUC_PATHWAY	0.644426	0	1697	1	1	0
REACTOME_SYNTHESIS_AND_INTERCONVERSION_OF_NUCLEOTIDE_DI_AND_TRIPHOSPHATES	PID_RB_1PATHWAY	0.603945	0	1697	0	0	0
REACTOME_SYNTHESIS_OF_DNA	PID_NETRIN_PATHWAY	0.669117	0	1529	6	1	5
REACTOME_SYNTHESIS_OF_PE	BIOCARTA_TCR_PATHWAY	0.775887	0	1920	8	1	7
REACTOME_SYNTHESIS_OF_PE	PID_ECADHERIN_KERATINOCYTE_PATHWAY	0.751992	0	1920	6	0	6
REACTOME_SYNTHESIS_OF_PIPS_AT_THE_GOLGI_MEMBRANE	BIOCARTA_CHREBP2_PATHWAY	0.712383	0	2028	18	0	18
REACTOME_SYNTHESIS_OF_PIPS_AT_THE_GOLGI_MEMBRANE	BIOCARTA_ECM_PATHWAY	0.693328	0	2028	13	5	8
REACTOME_SYNTHESIS_OF_PIPS_AT_THE_GOLGI_MEMBRANE	KEGG_ADHERENS_JUNCTION	0.669353	0	2028	53	7	46
REACTOME_SYNTHESIS_OF_PIPS_AT_THE_GOLGI_MEMBRANE	PID_AJDISS_2PATHWAY	0.61566	0	2028	23	0	23
REACTOME_SYNTHESIS_OF_PIPS_AT_THE_GOLGI_MEMBRANE	PID_ER_NONGENOMIC_PATHWAY	0.601817	0	2028	37	7	30
REACTOME_SYNTHESIS_OF_PIPS_AT_THE_GOLGI_MEMBRANE	REACTOME_CTLA4_INHIBITORY_SIGNALING	0.689532	0	2028	19	2	17
REACTOME_SYNTHESIS_OF_PIPS_AT_THE_GOLGI_MEMBRANE	REACTOME_DOWNREGULATION_OF_SMAD2_3_SMAD4_TRANSCRIPTIONAL_ACTIVITY	0.721242	0	2028	22	5	17
REACTOME_SYNTHESIS_OF_PIPS_AT_THE_GOLGI_MEMBRANE	REACTOME_NETRIN1_SIGNALING	0.633074	0	2028	16	2	14
REACTOME_SYNTHESIS_OF_VERY_LONG_CHAIN_FATTY_ACYL_COAS	PID_INSULIN_PATHWAY	0.639069	0	1000	8	0	8
REACTOME_SYNTHESIS_OF_VERY_LONG_CHAIN_FATTY_ACYL_COAS	SIG_INSULIN_RECEPTOR_PATHWAY_IN_CARDIAC_MYOCYTES	0.639509	0	1000	6	0	6
REACTOME_SYNTHESIS_OF_VERY_LONG_CHAIN_FATTY_ACYL_COAS	SIG_PIP3_SIGNALING_IN_CARDIAC_MYOCTES	0.648597	0	1000	5	0	5
REACTOME_SYNTHESIS_SECRETION_AND_DEACYLATION_OF_GHRELIN	BIOCARTA_RAB_PATHWAY	0.782841	0	991	0	0	0
REACTOME_SYNTHESIS_SECRETION_AND_DEACYLATION_OF_GHRELIN	PID_ECADHERIN_KERATINOCYTE_PATHWAY	0.803906	0	991	1	0	1
REACTOME_TERMINATION_OF_O_GLYCAN_BIOSYNTHESIS	BIOCARTA_PTDINS_PATHWAY	0.762892	0	652	1	0	1
REACTOME_TERMINATION_OF_O_GLYCAN_BIOSYNTHESIS	PID_INSULIN_GLUCOSE_PATHWAY	0.725415	0	652	0	0	0
REACTOME_TERMINATION_OF_O_GLYCAN_BIOSYNTHESIS	REACTOME_SIGNALING_BY_RHO_GTPASES	0.722497	0	652	1	1	0
REACTOME_TERMINATION_OF_O_GLYCAN_BIOSYNTHESIS	REACTOME_SIGNALLING_BY_NGF	0.618884	0	652	2	1	1
REACTOME_TETRAHYDROBIOPTERIN_BH4_SYNTHESIS_RECYCLING_SALVAGE_AND_REGULATION	PID_ECADHERIN_NASCENTAJ_PATHWAY	0.633702	0	1213	9	0	9
REACTOME_TGF_BETA_RECEPTOR_SIGNALING_IN_EMT_EPITHELIAL_TO_MESENCHYMAL_TRANSITION	PID_AJDISS_2PATHWAY	0.612849	0	1509	12	1	11
REACTOME_TGF_BETA_RECEPTOR_SIGNALING_IN_EMT_EPITHELIAL_TO_MESENCHYMAL_TRANSITION	PID_IGF1_PATHWAY	0.736816	0	1509	10	1	9
REACTOME_THE_ROLE_OF_NEF_IN_HIV1_REPLICATION_AND_DISEASE_PATHOGENESIS	KEGG_AXON_GUIDANCE	0.620648	0	1446	38	4	34
REACTOME_THE_ROLE_OF_NEF_IN_HIV1_REPLICATION_AND_DISEASE_PATHOGENESIS	PID_AJDISS_2PATHWAY	0.650355	0	1446	13	2	11
REACTOME_THE_ROLE_OF_NEF_IN_HIV1_REPLICATION_AND_DISEASE_PATHOGENESIS	PID_FGF_PATHWAY	0.8175	0	1446	21	1	20
REACTOME_TOLL_RECEPTOR_CASCADES	KEGG_VASOPRESSIN_REGULATED_WATER_REABSORPTION	0.600139	0	2058	45	6	39
REACTOME_TRAF3_DEPENDENT_IRF_ACTIVATION_PATHWAY	BIOCARTA_CHREBP2_PATHWAY	0.692453	0	1900	8	0	8
REACTOME_TRAF6_MEDIATED_INDUCTION_OF_TAK1_COMPLEX	PID_AR_TF_PATHWAY	0.602138	0	1968	19	0	19
REACTOME_TRAF6_MEDIATED_INDUCTION_OF_TAK1_COMPLEX	PID_NCADHERINPATHWAY	0.653345	0	1968	8	0	8
REACTOME_TRAF6_MEDIATED_INDUCTION_OF_TAK1_COMPLEX	PID_NEPHRIN_NEPH1_PATHWAY	0.762229	0	1968	11	0	11
REACTOME_TRAF6_MEDIATED_IRF7_ACTIVATION_IN_TLR7_8_OR_9_SIGNALING	PID_BETACATENIN_NUC_PATHWAY	0.634185	0	920	1	0	1
REACTOME_TRAFFICKING_OF_AMPA_RECEPTORS	REACTOME_DOWNREGULATION_OF_SMAD2_3_SMAD4_TRANSCRIPTIONAL_ACTIVITY	0.759848	0	1880	7	0	7
REACTOME_TRANSFERRIN_ENDOCYTOSIS_AND_RECYCLING	BIOCARTA_TCR_PATHWAY	0.652142	0	1730	5	0	5
REACTOME_TRANSFERRIN_ENDOCYTOSIS_AND_RECYCLING	KEGG_COLORECTAL_CANCER	0.633095	0	1730	10	0	10
REACTOME_TRANSFERRIN_ENDOCYTOSIS_AND_RECYCLING	PID_ECADHERIN_NASCENTAJ_PATHWAY	0.610606	0	1730	7	0	7
REACTOME_TRANSFERRIN_ENDOCYTOSIS_AND_RECYCLING	PID_INSULIN_PATHWAY	0.630909	0	1730	6	0	6
REACTOME_TRANSFERRIN_ENDOCYTOSIS_AND_RECYCLING	REACTOME_DOWNREGULATION_OF_SMAD2_3_SMAD4_TRANSCRIPTIONAL_ACTIVITY	0.629802	0	1730	4	0	4
REACTOME_TRANSMEMBRANE_TRANSPORT_OF_SMALL_MOLECULES	BIOCARTA_PTDINS_PATHWAY	0.649175	0	2109	85	7	78
REACTOME_TRANSPORT_OF_INORGANIC_CATIONS_ANIONS_AND_AMINO_ACIDS_OLIGOPEPTIDES	BIOCARTA_PTDINS_PATHWAY	0.635505	0	2076	13	0	13
REACTOME_TRANSPORT_OF_MATURE_MRNA_DERIVED_FROM_AN_INTRONLESS_TRANSCRIPT	BIOCARTA_TCR_PATHWAY	0.6804	0	1972	24	1	23
REACTOME_TRANSPORT_OF_MATURE_TRANSCRIPT_TO_CYTOPLASM	BIOCARTA_TCR_PATHWAY	0.681624	0	1975	29	1	28
REACTOME_TRANSPORT_OF_RIBONUCLEOPROTEINS_INTO_THE_HOST_NUCLEUS	BIOCARTA_TCR_PATHWAY	0.675033	0	2024	25	1	24
REACTOME_TRANS_GOLGI_NETWORK_VESICLE_BUDDING	BIOCARTA_ALK_PATHWAY	0.625412	0	1862	66	11	55
REACTOME_TRANS_GOLGI_NETWORK_VESICLE_BUDDING	REACTOME_REGULATION_OF_KIT_SIGNALING	0.661024	0	1862	32	2	30
REACTOME_TRIGLYCERIDE_BIOSYNTHESIS	PID_NOTCH_PATHWAY	0.816491	0	1111	12	1	11
REACTOME_VEGF_LIGAND_RECEPTOR_INTERACTIONS	REACTOME_INSULIN_RECEPTOR_SIGNALLING_CASCADE	0.616792	0	1105	4	0	4
REACTOME_YAP1_AND_WWTR1_TAZ_STIMULATED_GENE_EXPRESSION	REACTOME_SIGNALING_BY_BMP	0.64834	0	2014	36	5	31
SA_G1_AND_S_PHASES	REACTOME_NETRIN1_SIGNALING	0.608896	0	1770	7	0	7
SA_G1_AND_S_PHASES	REACTOME_SIGNALING_BY_ROBO_RECEPTOR	0.744393	0	1770	7	1	6
SA_PTEN_PATHWAY	PID_AR_TF_PATHWAY	0.733594	0	1373	23	3	20
SIG_IL4RECEPTOR_IN_B_LYPHOCYTES	BIOCARTA_ALK_PATHWAY	0.659915	0	1991	34	0	34
SIG_IL4RECEPTOR_IN_B_LYPHOCYTES	PID_BETACATENIN_NUC_PATHWAY	0.619806	0	1991	30	2	28
SIG_PIP3_SIGNALING_IN_B_LYMPHOCYTES	KEGG_COLORECTAL_CANCER	0.651456	0	1894	27	1	26
ST_ADRENERGIC	KEGG_MELANOGENESIS	0.648609	0	2046	36	3	33
ST_DIFFERENTIATION_PATHWAY_IN_PC12_CELLS	BIOCARTA_PTDINS_PATHWAY	0.704902	0	2055	32	5	27
ST_ERK1_ERK2_MAPK_PATHWAY	KEGG_VASOPRESSIN_REGULATED_WATER_REABSORPTION	0.687619	0	1724	15	3	12
ST_FAS_SIGNALING_PATHWAY	BIOCARTA_PTDINS_PATHWAY	0.800583	0	2056	36	4	32
ST_GAQ_PATHWAY	BIOCARTA_PTDINS_PATHWAY	0.773444	0	1945	7	0	7
ST_GAQ_PATHWAY	PID_NCADHERINPATHWAY	0.683588	0	1945	12	0	12
ST_G_ALPHA_S_PATHWAY	KEGG_MELANOGENESIS	0.639062	0	2015	30	6	24
ST_G_ALPHA_S_PATHWAY	PID_CDC42_PATHWAY	0.608686	0	2015	38	6	32
ST_G_ALPHA_S_PATHWAY	PID_FAK_PATHWAY	0.61081	0	2015	27	2	25
ST_G_ALPHA_S_PATHWAY	PID_NCADHERINPATHWAY	0.645929	0	2015	15	5	10
ST_G_ALPHA_S_PATHWAY	SIG_CHEMOTAXIS	0.658811	0	2015	15	3	12
ST_G_ALPHA_S_PATHWAY	SIG_INSULIN_RECEPTOR_PATHWAY_IN_CARDIAC_MYOCYTES	0.644534	0	2015	20	3	17
ST_JNK_MAPK_PATHWAY	BIOCARTA_PTDINS_PATHWAY	0.76252	0	1931	40	4	36
ST_P38_MAPK_PATHWAY	KEGG_ADHERENS_JUNCTION	0.634016	0	1976	87	7	80
ST_PHOSPHOINOSITIDE_3_KINASE_PATHWAY	PID_EPHBFWDPATHWAY	0.612138	0	1585	30	0	30
ST_PHOSPHOINOSITIDE_3_KINASE_PATHWAY	REACTOME_TGF_BETA_RECEPTOR_SIGNALING_ACTIVATES_SMADS	0.663253	0	1585	22	6	16
ST_WNT_CA2_CYCLIC_GMP_PATHWAY	PID_SMAD2_3PATHWAY	0.656666	0	1997	14	0	14

## Sheet: connection of Gained cePathways
pathway	degree	norm_degree
KEGG_UBIQUITIN_MEDIATED_PROTEOLYSIS	200	0.252207
PID_PDGFRBPATHWAY	80	0.100883
PID_MTOR_4PATHWAY	75	0.0945776
KEGG_ENDOCYTOSIS	64	0.0807062
KEGG_OOCYTE_MEIOSIS	62	0.0781841
KEGG_NEUROTROPHIN_SIGNALING_PATHWAY	56	0.0706179
REACTOME_NGF_SIGNALLING_VIA_TRKA_FROM_THE_PLASMA_MEMBRANE	48	0.0605296
REACTOME_SIGNALLING_BY_NGF	46	0.0580076
KEGG_REGULATION_OF_ACTIN_CYTOSKELETON	45	0.0567465
REACTOME_SIGNALING_BY_RHO_GTPASES	45	0.0567465
PID_CMYB_PATHWAY	43	0.0542245
PID_HIF1_TFPATHWAY	39	0.0491803
KEGG_WNT_SIGNALING_PATHWAY	39	0.0491803
PID_MET_PATHWAY	34	0.0428752
PID_ERBB1_INTERNALIZATION_PATHWAY	34	0.0428752
KEGG_AXON_GUIDANCE	32	0.0403531
PID_NFAT_3PATHWAY	32	0.0403531
KEGG_PATHWAYS_IN_CANCER	30	0.037831
KEGG_MAPK_SIGNALING_PATHWAY	29	0.03657
PID_TGFBRPATHWAY	22	0.0277427
PID_SMAD2_3NUCLEARPATHWAY	21	0.0264817
PID_ERBB1_DOWNSTREAM_PATHWAY	19	0.0239596
KEGG_TIGHT_JUNCTION	19	0.0239596
PID_LKB1_PATHWAY	18	0.0226986
PID_FAK_PATHWAY	17	0.0214376
PID_HIF2PATHWAY	17	0.0214376
PID_ECADHERIN_NASCENTAJ_PATHWAY	17	0.0214376
KEGG_T_CELL_RECEPTOR_SIGNALING_PATHWAY	17	0.0214376
KEGG_RENAL_CELL_CARCINOMA	16	0.0201765
REACTOME_OPIOID_SIGNALLING	16	0.0201765
KEGG_FOCAL_ADHESION	15	0.0189155
PID_RET_PATHWAY	15	0.0189155
KEGG_TGF_BETA_SIGNALING_PATHWAY	14	0.0176545
PID_PI3KCIPATHWAY	14	0.0176545
PID_RB_1PATHWAY	14	0.0176545
REACTOME_SIGNALING_BY_ERBB2	13	0.0163934
KEGG_MELANOGENESIS	13	0.0163934
REACTOME_FANCONI_ANEMIA_PATHWAY	12	0.0151324
KEGG_INSULIN_SIGNALING_PATHWAY	12	0.0151324
REACTOME_SIGNALING_BY_TGF_BETA_RECEPTOR_COMPLEX	12	0.0151324
PID_HIF1APATHWAY	12	0.0151324
REACTOME_TRANS_GOLGI_NETWORK_VESICLE_BUDDING	12	0.0151324
BIOCARTA_MET_PATHWAY	12	0.0151324
PID_VEGFR1_2_PATHWAY	11	0.0138714
REACTOME_SYNTHESIS_OF_PE	11	0.0138714
PID_TRKRPATHWAY	11	0.0138714
REACTOME_CIRCADIAN_CLOCK	11	0.0138714
REACTOME_PLATELET_ACTIVATION_SIGNALING_AND_AGGREGATION	11	0.0138714
PID_RHOA_PATHWAY	11	0.0138714
PID_INSULIN_PATHWAY	11	0.0138714
PID_NCADHERINPATHWAY	11	0.0138714
REACTOME_FATTY_ACID_TRIACYLGLYCEROL_AND_KETONE_BODY_METABOLISM	11	0.0138714
KEGG_BASAL_TRANSCRIPTION_FACTORS	11	0.0138714
ST_PHOSPHOINOSITIDE_3_KINASE_PATHWAY	10	0.0126103
REACTOME_DOWNSTREAM_SIGNAL_TRANSDUCTION	10	0.0126103
REACTOME_SIGNALING_BY_EGFR_IN_CANCER	10	0.0126103
REACTOME_REGULATION_OF_HYPOXIA_INDUCIBLE_FACTOR_HIF_BY_OXYGEN	10	0.0126103
KEGG_FC_GAMMA_R_MEDIATED_PHAGOCYTOSIS	10	0.0126103
PID_MYC_ACTIVPATHWAY	10	0.0126103
BIOCARTA_ALK_PATHWAY	9	0.0113493
PID_FOXOPATHWAY	9	0.0113493
REACTOME_ELONGATION_ARREST_AND_RECOVERY	9	0.0113493
PID_ATR_PATHWAY	9	0.0113493
PID_PI3KCIAKTPATHWAY	9	0.0113493
REACTOME_PPARA_ACTIVATES_GENE_EXPRESSION	9	0.0113493
PID_CXCR4_PATHWAY	9	0.0113493
SIG_CHEMOTAXIS	9	0.0113493
REACTOME_PREFOLDIN_MEDIATED_TRANSFER_OF_SUBSTRATE_TO_CCT_TRIC	9	0.0113493
KEGG_GLYCEROLIPID_METABOLISM	9	0.0113493
PID_EPHBFWDPATHWAY	9	0.0113493
BIOCARTA_CHREBP2_PATHWAY	8	0.0100883
KEGG_PRION_DISEASES	8	0.0100883
BIOCARTA_MAPK_PATHWAY	8	0.0100883
REACTOME_3_UTR_MEDIATED_TRANSLATIONAL_REGULATION	8	0.0100883
REACTOME_ION_TRANSPORT_BY_P_TYPE_ATPASES	8	0.0100883
REACTOME_ANTIGEN_PROCESSING_CROSS_PRESENTATION	8	0.0100883
BIOCARTA_HIF_PATHWAY	8	0.0100883
PID_KITPATHWAY	8	0.0100883
SIG_INSULIN_RECEPTOR_PATHWAY_IN_CARDIAC_MYOCYTES	8	0.0100883
REACTOME_RECRUITMENT_OF_MITOTIC_CENTROSOME_PROTEINS_AND_COMPLEXES	8	0.0100883
KEGG_PORPHYRIN_AND_CHLOROPHYLL_METABOLISM	8	0.0100883
PID_P38_MK2PATHWAY	8	0.0100883
PID_PI3KPLCTRKPATHWAY	8	0.0100883
KEGG_DILATED_CARDIOMYOPATHY	7	0.00882724
REACTOME_IRON_UPTAKE_AND_TRANSPORT	7	0.00882724
REACTOME_RNA_POL_II_PRE_TRANSCRIPTION_EVENTS	7	0.00882724
REACTOME_GOLGI_ASSOCIATED_VESICLE_BIOGENESIS	7	0.00882724
BIOCARTA_CARM_ER_PATHWAY	7	0.00882724
REACTOME_SIGNALING_BY_FGFR_IN_DISEASE	7	0.00882724
REACTOME_FORMATION_OF_TUBULIN_FOLDING_INTERMEDIATES_BY_CCT_TRIC	7	0.00882724
KEGG_HYPERTROPHIC_CARDIOMYOPATHY_HCM	7	0.00882724
REACTOME_APC_C_CDC20_MEDIATED_DEGRADATION_OF_CYCLIN_B	7	0.00882724
REACTOME_REGULATION_OF_THE_FANCONI_ANEMIA_PATHWAY	7	0.00882724
KEGG_LONG_TERM_POTENTIATION	7	0.00882724
KEGG_PURINE_METABOLISM	7	0.00882724
KEGG_GLIOMA	7	0.00882724
BIOCARTA_AT1R_PATHWAY	7	0.00882724
REACTOME_P75_NTR_RECEPTOR_MEDIATED_SIGNALLING	7	0.00882724
PID_P38_MKK3_6PATHWAY	7	0.00882724
REACTOME_ADENYLATE_CYCLASE_INHIBITORY_PATHWAY	6	0.0075662
KEGG_ADHERENS_JUNCTION	6	0.0075662
REACTOME_TRAF6_MEDIATED_INDUCTION_OF_TAK1_COMPLEX	6	0.0075662
PID_RANBP2PATHWAY	6	0.0075662
PID_FANCONI_PATHWAY	6	0.0075662
BIOCARTA_PYK2_PATHWAY	6	0.0075662
PID_ARF6_TRAFFICKINGPATHWAY	6	0.0075662
BIOCARTA_TCR_PATHWAY	6	0.0075662
REACTOME_YAP1_AND_WWTR1_TAZ_STIMULATED_GENE_EXPRESSION	6	0.0075662
REACTOME_CELL_CYCLE_CHECKPOINTS	6	0.0075662
REACTOME_REGULATION_OF_MITOTIC_CELL_CYCLE	6	0.0075662
REACTOME_CHROMOSOME_MAINTENANCE	6	0.0075662
REACTOME_MITOCHONDRIAL_PROTEIN_IMPORT	6	0.0075662
BIOCARTA_P53_PATHWAY	6	0.0075662
PID_CDC42_PATHWAY	6	0.0075662
REACTOME_FORMATION_OF_THE_TERNARY_COMPLEX_AND_SUBSEQUENTLY_THE_43S_COMPLEX	6	0.0075662
ST_JNK_MAPK_PATHWAY	6	0.0075662
REACTOME_G0_AND_EARLY_G1	6	0.0075662
BIOCARTA_BCELLSURVIVAL_PATHWAY	5	0.00630517
REACTOME_ACTIVATION_OF_THE_MRNA_UPON_BINDING_OF_THE_CAP_BINDING_COMPLEX_AND_EIFS_AND_SUBSEQUENT_BINDING_TO_43S	5	0.00630517
BIOCARTA_DNAFRAGMENT_PATHWAY	5	0.00630517
REACTOME_ION_CHANNEL_TRANSPORT	5	0.00630517
PID_IGF1_PATHWAY	5	0.00630517
REACTOME_LOSS_OF_NLP_FROM_MITOTIC_CENTROSOMES	5	0.00630517
REACTOME_MITOTIC_M_M_G1_PHASES	5	0.00630517
REACTOME_TRNA_AMINOACYLATION	5	0.00630517
KEGG_LONG_TERM_DEPRESSION	5	0.00630517
PID_VEGFR1_PATHWAY	5	0.00630517
REACTOME_NEGATIVE_REGULATORS_OF_RIG_I_MDA5_SIGNALING	5	0.00630517
REACTOME_MRNA_PROCESSING	5	0.00630517
BIOCARTA_RHO_PATHWAY	5	0.00630517
REACTOME_GLYCEROPHOSPHOLIPID_BIOSYNTHESIS	5	0.00630517
REACTOME_ADAPTIVE_IMMUNE_SYSTEM	5	0.00630517
SIG_PIP3_SIGNALING_IN_CARDIAC_MYOCTES	5	0.00630517
REACTOME_PHOSPHORYLATION_OF_THE_APC_C	5	0.00630517
KEGG_PYRIMIDINE_METABOLISM	5	0.00630517
PID_LPA4_PATHWAY	5	0.00630517
KEGG_APOPTOSIS	5	0.00630517
REACTOME_GABA_RECEPTOR_ACTIVATION	5	0.00630517
REACTOME_INSULIN_SYNTHESIS_AND_PROCESSING	5	0.00630517
PID_IL12_2PATHWAY	5	0.00630517
REACTOME_METABOLISM_OF_AMINO_ACIDS_AND_DERIVATIVES	5	0.00630517
REACTOME_IRAK2_MEDIATED_ACTIVATION_OF_TAK1_COMPLEX_UPON_TLR7_8_OR_9_STIMULATION	5	0.00630517
REACTOME_PKB_MEDIATED_EVENTS	5	0.00630517
SA_PROGRAMMED_CELL_DEATH	5	0.00630517
BIOCARTA_ECM_PATHWAY	5	0.00630517
PID_PLK1_PATHWAY	5	0.00630517
PID_RAS_PATHWAY	5	0.00630517
REACTOME_DOWNSTREAM_SIGNALING_OF_ACTIVATED_FGFR	5	0.00630517
REACTOME_DOWNSTREAM_TCR_SIGNALING	5	0.00630517
REACTOME_METABOLISM_OF_LIPIDS_AND_LIPOPROTEINS	5	0.00630517
REACTOME_TRANSCRIPTIONAL_ACTIVITY_OF_SMAD2_SMAD3_SMAD4_HETEROTRIMER	5	0.00630517
REACTOME_AMINO_ACID_AND_OLIGOPEPTIDE_SLC_TRANSPORTERS	5	0.00630517
REACTOME_ER_PHAGOSOME_PATHWAY	5	0.00630517
BIOCARTA_RANMS_PATHWAY	5	0.00630517
REACTOME_RNA_POL_I_PROMOTER_OPENING	5	0.00630517
REACTOME_CELL_DEATH_SIGNALLING_VIA_NRAGE_NRIF_AND_NADE	5	0.00630517
REACTOME_RORA_ACTIVATES_CIRCADIAN_EXPRESSION	5	0.00630517
KEGG_P53_SIGNALING_PATHWAY	5	0.00630517
REACTOME_PROTEIN_FOLDING	5	0.00630517
PID_ERB_GENOMIC_PATHWAY	5	0.00630517
REACTOME_PI3K_AKT_ACTIVATION	5	0.00630517
PID_EPHA_FWDPATHWAY	5	0.00630517
REACTOME_SIGNALING_BY_FGFR	5	0.00630517
PID_IL2_STAT5PATHWAY	4	0.00504414
REACTOME_ASSOCIATION_OF_TRIC_CCT_WITH_TARGET_PROTEINS_DURING_BIOSYNTHESIS	4	0.00504414
KEGG_COLORECTAL_CANCER	4	0.00504414
REACTOME_ACTIVATION_OF_NF_KAPPAB_IN_B_CELLS	4	0.00504414
PID_ALK1PATHWAY	4	0.00504414
REACTOME_RNA_POL_II_TRANSCRIPTION_PRE_INITIATION_AND_PROMOTER_OPENING	4	0.00504414
KEGG_CHEMOKINE_SIGNALING_PATHWAY	4	0.00504414
REACTOME_SIGNALING_BY_CONSTITUTIVELY_ACTIVE_EGFR	4	0.00504414
REACTOME_TRANSMISSION_ACROSS_CHEMICAL_SYNAPSES	4	0.00504414
REACTOME_M_G1_TRANSITION	4	0.00504414
BIOCARTA_RACCYCD_PATHWAY	4	0.00504414
REACTOME_SIGNALING_BY_PDGF	4	0.00504414
PID_ER_NONGENOMIC_PATHWAY	4	0.00504414
BIOCARTA_RARRXR_PATHWAY	4	0.00504414
REACTOME_CASPASE_MEDIATED_CLEAVAGE_OF_CYTOSKELETAL_PROTEINS	4	0.00504414
SIG_BCR_SIGNALING_PATHWAY	4	0.00504414
PID_CERAMIDE_PATHWAY	4	0.00504414
REACTOME_SIGNALING_BY_SCF_KIT	4	0.00504414
REACTOME_BMAL1_CLOCK_NPAS2_ACTIVATES_CIRCADIAN_EXPRESSION	4	0.00504414
PID_IL12_STAT4PATHWAY	4	0.00504414
REACTOME_SYNTHESIS_OF_PIPS_AT_THE_PLASMA_MEMBRANE	4	0.00504414
PID_RAC1_PATHWAY	4	0.00504414
REACTOME_DESTABILIZATION_OF_MRNA_BY_AUF1_HNRNP_D0	4	0.00504414
REACTOME_CELL_JUNCTION_ORGANIZATION	4	0.00504414
PID_INSULIN_GLUCOSE_PATHWAY	4	0.00504414
REACTOME_MEIOSIS	4	0.00504414
PID_BETACATENIN_NUC_PATHWAY	4	0.00504414
REACTOME_ADP_SIGNALLING_THROUGH_P2RY12	4	0.00504414
KEGG_CHRONIC_MYELOID_LEUKEMIA	4	0.00504414
KEGG_LYSINE_DEGRADATION	4	0.00504414
REACTOME_TRANSFERRIN_ENDOCYTOSIS_AND_RECYCLING	4	0.00504414
KEGG_REGULATION_OF_AUTOPHAGY	4	0.00504414
REACTOME_PEPTIDE_CHAIN_ELONGATION	4	0.00504414
PID_MYC_REPRESSPATHWAY	4	0.00504414
REACTOME_MEMBRANE_TRAFFICKING	4	0.00504414
PID_FGF_PATHWAY	4	0.00504414
REACTOME_G_ALPHA_Z_SIGNALLING_EVENTS	4	0.00504414
REACTOME_MYOGENESIS	4	0.00504414
REACTOME_PECAM1_INTERACTIONS	4	0.00504414
REACTOME_HEPARAN_SULFATE_HEPARIN_HS_GAG_METABOLISM	4	0.00504414
REACTOME_SRP_DEPENDENT_COTRANSLATIONAL_PROTEIN_TARGETING_TO_MEMBRANE	4	0.00504414
KEGG_BASE_EXCISION_REPAIR	4	0.00504414
KEGG_CELL_CYCLE	4	0.00504414
SIG_REGULATION_OF_THE_ACTIN_CYTOSKELETON_BY_RHO_GTPASES	4	0.00504414
REACTOME_CELL_CELL_COMMUNICATION	4	0.00504414
REACTOME_SYNTHESIS_OF_PIPS_AT_THE_EARLY_ENDOSOME_MEMBRANE	4	0.00504414
REACTOME_RNA_POL_I_TRANSCRIPTION	4	0.00504414
BIOCARTA_ETS_PATHWAY	4	0.00504414
REACTOME_MITOTIC_G2_G2_M_PHASES	4	0.00504414
REACTOME_RNA_POL_III_TRANSCRIPTION_INITIATION_FROM_TYPE_2_PROMOTER	4	0.00504414
PID_HDAC_CLASSIII_PATHWAY	4	0.00504414
REACTOME_ENDOSOMAL_SORTING_COMPLEX_REQUIRED_FOR_TRANSPORT_ESCRT	4	0.00504414
REACTOME_OXYGEN_DEPENDENT_PROLINE_HYDROXYLATION_OF_HYPOXIA_INDUCIBLE_FACTOR_ALPHA	4	0.00504414
REACTOME_G_PROTEIN_ACTIVATION	4	0.00504414
PID_P53REGULATIONPATHWAY	4	0.00504414
BIOCARTA_SALMONELLA_PATHWAY	4	0.00504414
REACTOME_TRAF3_DEPENDENT_IRF_ACTIVATION_PATHWAY	4	0.00504414
REACTOME_REGULATION_OF_GLUCOKINASE_BY_GLUCOKINASE_REGULATORY_PROTEIN	4	0.00504414
REACTOME_SIGNALING_BY_WNT	4	0.00504414
KEGG_GNRH_SIGNALING_PATHWAY	4	0.00504414
REACTOME_FORMATION_OF_ATP_BY_CHEMIOSMOTIC_COUPLING	4	0.00504414
PID_NETRIN_PATHWAY	4	0.00504414
REACTOME_METABOLISM_OF_NUCLEOTIDES	4	0.00504414
REACTOME_CYTOSOLIC_TRNA_AMINOACYLATION	4	0.00504414
REACTOME_SYNTHESIS_OF_DNA	4	0.00504414
REACTOME_ACTIVATION_OF_GENES_BY_ATF4	4	0.00504414
BIOCARTA_SODD_PATHWAY	4	0.00504414
REACTOME_APC_C_CDC20_MEDIATED_DEGRADATION_OF_MITOTIC_PROTEINS	3	0.0037831
REACTOME_LIPID_DIGESTION_MOBILIZATION_AND_TRANSPORT	3	0.0037831
PID_AR_PATHWAY	3	0.0037831
BIOCARTA_RNA_PATHWAY	3	0.0037831
PID_LIS1PATHWAY	3	0.0037831
REACTOME_SIGNALING_BY_BMP	3	0.0037831
BIOCARTA_CTCF_PATHWAY	3	0.0037831
KEGG_FATTY_ACID_METABOLISM	3	0.0037831
PID_ECADHERIN_KERATINOCYTE_PATHWAY	3	0.0037831
PID_SMAD2_3PATHWAY	3	0.0037831
PID_TAP63PATHWAY	3	0.0037831
REACTOME_DESTABILIZATION_OF_MRNA_BY_KSRP	3	0.0037831
PID_REG_GR_PATHWAY	3	0.0037831
BIOCARTA_CDC42RAC_PATHWAY	3	0.0037831
REACTOME_TRANSPORT_OF_MATURE_MRNA_DERIVED_FROM_AN_INTRONLESS_TRANSCRIPT	3	0.0037831
REACTOME_DEPOSITION_OF_NEW_CENPA_CONTAINING_NUCLEOSOMES_AT_THE_CENTROMERE	3	0.0037831
REACTOME_BASE_EXCISION_REPAIR	3	0.0037831
REACTOME_AMYLOIDS	3	0.0037831
KEGG_TERPENOID_BACKBONE_BIOSYNTHESIS	3	0.0037831
KEGG_CYSTEINE_AND_METHIONINE_METABOLISM	3	0.0037831
REACTOME_DOWNREGULATION_OF_SMAD2_3_SMAD4_TRANSCRIPTIONAL_ACTIVITY	3	0.0037831
REACTOME_DEADENYLATION_OF_MRNA	3	0.0037831
REACTOME_CYTOKINE_SIGNALING_IN_IMMUNE_SYSTEM	3	0.0037831
REACTOME_PI3K_EVENTS_IN_ERBB4_SIGNALING	3	0.0037831
REACTOME_INCRETIN_SYNTHESIS_SECRETION_AND_INACTIVATION	3	0.0037831
KEGG_CYTOSOLIC_DNA_SENSING_PATHWAY	3	0.0037831
REACTOME_CIRCADIAN_REPRESSION_OF_EXPRESSION_BY_REV_ERBA	3	0.0037831
REACTOME_NUCLEOTIDE_EXCISION_REPAIR	3	0.0037831
REACTOME_MRNA_SPLICING	3	0.0037831
REACTOME_ENERGY_DEPENDENT_REGULATION_OF_MTOR_BY_LKB1_AMPK	3	0.0037831
PID_TCRRASPATHWAY	3	0.0037831
REACTOME_TRANSCRIPTION_COUPLED_NER_TC_NER	3	0.0037831
PID_TCRJNKPATHWAY	3	0.0037831
KEGG_SMALL_CELL_LUNG_CANCER	3	0.0037831
KEGG_SNARE_INTERACTIONS_IN_VESICULAR_TRANSPORT	3	0.0037831
REACTOME_TRANSLATION	3	0.0037831
SIG_CD40PATHWAYMAP	3	0.0037831
KEGG_VASOPRESSIN_REGULATED_WATER_REABSORPTION	3	0.0037831
PID_LYMPHANGIOGENESIS_PATHWAY	3	0.0037831
PID_REELINPATHWAY	3	0.0037831
REACTOME_CREB_PHOSPHORYLATION_THROUGH_THE_ACTIVATION_OF_RAS	3	0.0037831
REACTOME_MEIOTIC_RECOMBINATION	3	0.0037831
PID_THROMBIN_PAR1_PATHWAY	3	0.0037831
KEGG_MTOR_SIGNALING_PATHWAY	3	0.0037831
REACTOME_HEMOSTASIS	3	0.0037831
REACTOME_APOPTOTIC_CLEAVAGE_OF_CELLULAR_PROTEINS	3	0.0037831
BIOCARTA_MAL_PATHWAY	3	0.0037831
BIOCARTA_HER2_PATHWAY	3	0.0037831
PID_P53DOWNSTREAMPATHWAY	3	0.0037831
PID_AP1_PATHWAY	3	0.0037831
BIOCARTA_STATHMIN_PATHWAY	3	0.0037831
REACTOME_DNA_REPLICATION	3	0.0037831
BIOCARTA_LEPTIN_PATHWAY	3	0.0037831
REACTOME_REGULATION_OF_WATER_BALANCE_BY_RENAL_AQUAPORINS	3	0.0037831
REACTOME_APOBEC3G_MEDIATED_RESISTANCE_TO_HIV1_INFECTION	3	0.0037831
BIOCARTA_ERK_PATHWAY	3	0.0037831
REACTOME_REGULATION_OF_AMPK_ACTIVITY_VIA_LKB1	3	0.0037831
SA_CASPASE_CASCADE	3	0.0037831
BIOCARTA_ACTINY_PATHWAY	3	0.0037831
BIOCARTA_MITOCHONDRIA_PATHWAY	3	0.0037831
REACTOME_SIGNALING_BY_INSULIN_RECEPTOR	3	0.0037831
ST_DIFFERENTIATION_PATHWAY_IN_PC12_CELLS	3	0.0037831
PID_RETINOIC_ACID_PATHWAY	3	0.0037831
REACTOME_REGULATION_OF_IFNG_SIGNALING	3	0.0037831
REACTOME_PROCESSING_OF_CAPPED_INTRON_CONTAINING_PRE_MRNA	3	0.0037831
REACTOME_SYNTHESIS_SECRETION_AND_INACTIVATION_OF_GLP1	3	0.0037831
BIOCARTA_P53HYPOXIA_PATHWAY	3	0.0037831
REACTOME_VIF_MEDIATED_DEGRADATION_OF_APOBEC3G	3	0.0037831
BIOCARTA_MYOSIN_PATHWAY	3	0.0037831
REACTOME_VITAMIN_B5_PANTOTHENATE_METABOLISM	3	0.0037831
PID_RAC1_REG_PATHWAY	3	0.0037831
REACTOME_TRAF6_MEDIATED_IRF7_ACTIVATION_IN_TLR7_8_OR_9_SIGNALING	3	0.0037831
REACTOME_TETRAHYDROBIOPTERIN_BH4_SYNTHESIS_RECYCLING_SALVAGE_AND_REGULATION	3	0.0037831
REACTOME_HOMOLOGOUS_RECOMBINATION_REPAIR_OF_REPLICATION_INDEPENDENT_DOUBLE_STRAND_BREAKS	3	0.0037831
REACTOME_TIE2_SIGNALING	3	0.0037831
REACTOME_RNA_POL_I_RNA_POL_III_AND_MITOCHONDRIAL_TRANSCRIPTION	3	0.0037831
BIOCARTA_CARDIACEGF_PATHWAY	3	0.0037831
REACTOME_SIGNALING_BY_HIPPO	3	0.0037831
BIOCARTA_TNFR2_PATHWAY	3	0.0037831
PID_IL4_2PATHWAY	3	0.0037831
PID_ILK_PATHWAY	2	0.00252207
REACTOME_IRAK1_RECRUITS_IKK_COMPLEX	2	0.00252207
PID_P38ALPHABETADOWNSTREAMPATHWAY	2	0.00252207
BIOCARTA_ATRBRCA_PATHWAY	2	0.00252207
BIOCARTA_BARRESTIN_PATHWAY	2	0.00252207
REACTOME_GLUCONEOGENESIS	2	0.00252207
REACTOME_POST_TRANSLATIONAL_PROTEIN_MODIFICATION	2	0.00252207
REACTOME_REGULATION_OF_APOPTOSIS	2	0.00252207
ST_WNT_BETA_CATENIN_PATHWAY	2	0.00252207
REACTOME_CONVERSION_FROM_APC_C_CDC20_TO_APC_C_CDH1_IN_LATE_ANAPHASE	2	0.00252207
BIOCARTA_GCR_PATHWAY	2	0.00252207
BIOCARTA_PTDINS_PATHWAY	2	0.00252207
KEGG_ETHER_LIPID_METABOLISM	2	0.00252207
PID_ERBB1_RECEPTOR_PROXIMAL_PATHWAY	2	0.00252207
BIOCARTA_PTEN_PATHWAY	2	0.00252207
REACTOME_RESPIRATORY_ELECTRON_TRANSPORT	2	0.00252207
REACTOME_NCAM1_INTERACTIONS	2	0.00252207
REACTOME_PACKAGING_OF_TELOMERE_ENDS	2	0.00252207
REACTOME_LATE_PHASE_OF_HIV_LIFE_CYCLE	2	0.00252207
REACTOME_SIGNALING_BY_ROBO_RECEPTOR	2	0.00252207
REACTOME_SYNTHESIS_OF_PA	2	0.00252207
BIOCARTA_EIF_PATHWAY	2	0.00252207
KEGG_GLYCOSYLPHOSPHATIDYLINOSITOL_GPI_ANCHOR_BIOSYNTHESIS	2	0.00252207
REACTOME_L1CAM_INTERACTIONS	2	0.00252207
REACTOME_G_ALPHA_S_SIGNALLING_EVENTS	2	0.00252207
REACTOME_COLLAGEN_FORMATION	2	0.00252207
REACTOME_CD28_DEPENDENT_PI3K_AKT_SIGNALING	2	0.00252207
PID_INTEGRIN3_PATHWAY	2	0.00252207
REACTOME_SOS_MEDIATED_SIGNALLING	2	0.00252207
REACTOME_RNA_POL_III_TRANSCRIPTION_INITIATION_FROM_TYPE_3_PROMOTER	2	0.00252207
PID_IL5_PATHWAY	2	0.00252207
BIOCARTA_HSP27_PATHWAY	2	0.00252207
KEGG_RIBOSOME	2	0.00252207
REACTOME_PRE_NOTCH_EXPRESSION_AND_PROCESSING	2	0.00252207
PID_IL8CXCR2_PATHWAY	2	0.00252207
REACTOME_GABA_B_RECEPTOR_ACTIVATION	2	0.00252207
KEGG_VIRAL_MYOCARDITIS	2	0.00252207
KEGG_RIG_I_LIKE_RECEPTOR_SIGNALING_PATHWAY	2	0.00252207
REACTOME_NITRIC_OXIDE_STIMULATES_GUANYLATE_CYCLASE	2	0.00252207
REACTOME_NEUROTRANSMITTER_RECEPTOR_BINDING_AND_DOWNSTREAM_TRANSMISSION_IN_THE_POSTSYNAPTIC_CELL	2	0.00252207
KEGG_OXIDATIVE_PHOSPHORYLATION	2	0.00252207
REACTOME_TRANSPORT_OF_INORGANIC_CATIONS_ANIONS_AND_AMINO_ACIDS_OLIGOPEPTIDES	2	0.00252207
REACTOME_ACTIVATION_OF_THE_AP1_FAMILY_OF_TRANSCRIPTION_FACTORS	2	0.00252207
PID_INTEGRIN5_PATHWAY	2	0.00252207
BIOCARTA_EIF4_PATHWAY	2	0.00252207
KEGG_BASAL_CELL_CARCINOMA	2	0.00252207
PID_GLYPICAN_1PATHWAY	2	0.00252207
KEGG_INTESTINAL_IMMUNE_NETWORK_FOR_IGA_PRODUCTION	2	0.00252207
REACTOME_RESPIRATORY_ELECTRON_TRANSPORT_ATP_SYNTHESIS_BY_CHEMIOSMOTIC_COUPLING_AND_HEAT_PRODUCTION_BY_UNCOUPLING_PROTEINS_	2	0.00252207
PID_TCR_PATHWAY	2	0.00252207
REACTOME_G1_PHASE	2	0.00252207
PID_FCER1PATHWAY	2	0.00252207
PID_S1P_META_PATHWAY	2	0.00252207
REACTOME_VEGF_LIGAND_RECEPTOR_INTERACTIONS	2	0.00252207
PID_WNT_SIGNALING_PATHWAY	2	0.00252207
SIG_PIP3_SIGNALING_IN_B_LYMPHOCYTES	2	0.00252207
REACTOME_CELL_CYCLE	2	0.00252207
BIOCARTA_KERATINOCYTE_PATHWAY	2	0.00252207
WNT_SIGNALING	2	0.00252207
KEGG_GLUTATHIONE_METABOLISM	2	0.00252207
PID_TRAIL_PATHWAY	2	0.00252207
REACTOME_ROLE_OF_DCC_IN_REGULATING_APOPTOSIS	2	0.00252207
REACTOME_PYRIMIDINE_METABOLISM	2	0.00252207
SA_B_CELL_RECEPTOR_COMPLEXES	2	0.00252207
REACTOME_E2F_MEDIATED_REGULATION_OF_DNA_REPLICATION	2	0.00252207
REACTOME_G_ALPHA1213_SIGNALLING_EVENTS	2	0.00252207
REACTOME_INHIBITION_OF_INSULIN_SECRETION_BY_ADRENALINE_NORADRENALINE	2	0.00252207
REACTOME_SEMAPHORIN_INTERACTIONS	2	0.00252207
REACTOME_GLUTAMATE_NEUROTRANSMITTER_RELEASE_CYCLE	2	0.00252207
PID_HNF3BPATHWAY	2	0.00252207
REACTOME_TRANSPORT_OF_RIBONUCLEOPROTEINS_INTO_THE_HOST_NUCLEUS	2	0.00252207
BIOCARTA_CCR3_PATHWAY	2	0.00252207
REACTOME_APOPTOTIC_CLEAVAGE_OF_CELL_ADHESION_PROTEINS	2	0.00252207
KEGG_ALZHEIMERS_DISEASE	2	0.00252207
PID_TNFPATHWAY	2	0.00252207
REACTOME_APC_C_CDH1_MEDIATED_DEGRADATION_OF_CDC20_AND_OTHER_APC_C_CDH1_TARGETED_PROTEINS_IN_LATE_MITOSIS_EARLY_G1	2	0.00252207
KEGG_O_GLYCAN_BIOSYNTHESIS	2	0.00252207
PID_RHOA_REG_PATHWAY	2	0.00252207
REACTOME_CHOLESTEROL_BIOSYNTHESIS	2	0.00252207
PID_SYNDECAN_2_PATHWAY	2	0.00252207
REACTOME_DNA_REPAIR	2	0.00252207
REACTOME_GROWTH_HORMONE_RECEPTOR_SIGNALING	2	0.00252207
PID_IL23PATHWAY	2	0.00252207
REACTOME_RAF_MAP_KINASE_CASCADE	2	0.00252207
PID_HNF3APATHWAY	2	0.00252207
ST_TUMOR_NECROSIS_FACTOR_PATHWAY	2	0.00252207
BIOCARTA_AGPCR_PATHWAY	2	0.00252207
REACTOME_HIV_LIFE_CYCLE	2	0.00252207
REACTOME_DOWNREGULATION_OF_ERBB2_ERBB3_SIGNALING	2	0.00252207
PID_E2F_PATHWAY	2	0.00252207
KEGG_ONE_CARBON_POOL_BY_FOLATE	2	0.00252207
PID_MYC_PATHWAY	2	0.00252207
REACTOME_TRANSPORT_OF_GLUCOSE_AND_OTHER_SUGARS_BILE_SALTS_AND_ORGANIC_ACIDS_METAL_IONS_AND_AMINE_COMPOUNDS	2	0.00252207
REACTOME_G_ALPHA_I_SIGNALLING_EVENTS	2	0.00252207
REACTOME_INTERFERON_ALPHA_BETA_SIGNALING	2	0.00252207
KEGG_AMYOTROPHIC_LATERAL_SCLEROSIS_ALS	2	0.00252207
REACTOME_TRANSPORT_OF_VITAMINS_NUCLEOSIDES_AND_RELATED_MOLECULES	2	0.00252207
REACTOME_ASSEMBLY_OF_THE_PRE_REPLICATIVE_COMPLEX	2	0.00252207
KEGG_PROTEIN_EXPORT	2	0.00252207
REACTOME_NEF_MEDIATES_DOWN_MODULATION_OF_CELL_SURFACE_RECEPTORS_BY_RECRUITING_THEM_TO_CLATHRIN_ADAPTERS	2	0.00252207
REACTOME_SHC_MEDIATED_CASCADE	2	0.00252207
REACTOME_ADVANCED_GLYCOSYLATION_ENDPRODUCT_RECEPTOR_SIGNALING	2	0.00252207
BIOCARTA_NFAT_PATHWAY	2	0.00252207
REACTOME_REGULATION_OF_BETA_CELL_DEVELOPMENT	2	0.00252207
REACTOME_FORMATION_OF_RNA_POL_II_ELONGATION_COMPLEX_	2	0.00252207
BIOCARTA_IGF1MTOR_PATHWAY	2	0.00252207
REACTOME_TRANSCRIPTIONAL_REGULATION_OF_WHITE_ADIPOCYTE_DIFFERENTIATION	2	0.00252207
BIOCARTA_TPO_PATHWAY	2	0.00252207
REACTOME_INTEGRATION_OF_ENERGY_METABOLISM	2	0.00252207
KEGG_MISMATCH_REPAIR	2	0.00252207
KEGG_GLYCOLYSIS_GLUCONEOGENESIS	2	0.00252207
REACTOME_CHONDROITIN_SULFATE_BIOSYNTHESIS	2	0.00252207
BIOCARTA_CELLCYCLE_PATHWAY	2	0.00252207
KEGG_NEUROACTIVE_LIGAND_RECEPTOR_INTERACTION	2	0.00252207
REACTOME_CA_DEPENDENT_EVENTS	2	0.00252207
REACTOME_TCR_SIGNALING	2	0.00252207
BIOCARTA_FCER1_PATHWAY	2	0.00252207
BIOCARTA_CALCINEURIN_PATHWAY	2	0.00252207
REACTOME_FRS2_MEDIATED_CASCADE	2	0.00252207
REACTOME_RNA_POL_II_TRANSCRIPTION	2	0.00252207
BIOCARTA_CREB_PATHWAY	2	0.00252207
REACTOME_TRANSPORT_OF_MATURE_TRANSCRIPT_TO_CYTOPLASM	2	0.00252207
BIOCARTA_IL2RB_PATHWAY	2	0.00252207
PID_CD8TCRPATHWAY	2	0.00252207
REACTOME_SYNTHESIS_OF_PIPS_AT_THE_LATE_ENDOSOME_MEMBRANE	2	0.00252207
PID_TCPTP_PATHWAY	2	0.00252207
REACTOME_REGULATION_OF_PYRUVATE_DEHYDROGENASE_PDH_COMPLEX	2	0.00252207
PID_TCRCALCIUMPATHWAY	2	0.00252207
REACTOME_ACTIVATED_AMPK_STIMULATES_FATTY_ACID_OXIDATION_IN_MUSCLE	2	0.00252207
REACTOME_ACTIVATION_OF_BH3_ONLY_PROTEINS	2	0.00252207
BIOCARTA_EIF2_PATHWAY	2	0.00252207
REACTOME_IL_3_5_AND_GM_CSF_SIGNALING	2	0.00252207
REACTOME_APC_CDC20_MEDIATED_DEGRADATION_OF_NEK2A	2	0.00252207
REACTOME_PLATELET_HOMEOSTASIS	2	0.00252207
REACTOME_TRANSMEMBRANE_TRANSPORT_OF_SMALL_MOLECULES	2	0.00252207
REACTOME_INHIBITION_OF_THE_PROTEOLYTIC_ACTIVITY_OF_APC_C_REQUIRED_FOR_THE_ONSET_OF_ANAPHASE_BY_MITOTIC_SPINDLE_CHECKPOINT_COMPONENTS	2	0.00252207
ST_FAS_SIGNALING_PATHWAY	2	0.00252207
REACTOME_NOTCH1_INTRACELLULAR_DOMAIN_REGULATES_TRANSCRIPTION	2	0.00252207
REACTOME_CRMPS_IN_SEMA3A_SIGNALING	2	0.00252207
REACTOME_MTORC1_MEDIATED_SIGNALLING	2	0.00252207
REACTOME_ENOS_ACTIVATION_AND_REGULATION	2	0.00252207
REACTOME_PIP3_ACTIVATES_AKT_SIGNALING	2	0.00252207
KEGG_N_GLYCAN_BIOSYNTHESIS	2	0.00252207
REACTOME_REGULATION_OF_INSULIN_SECRETION_BY_ACETYLCHOLINE	2	0.00252207
PID_BCR_5PATHWAY	2	0.00252207
REACTOME_JNK_C_JUN_KINASES_PHOSPHORYLATION_AND_ACTIVATION_MEDIATED_BY_ACTIVATED_HUMAN_TAK1	2	0.00252207
PID_IL2_1PATHWAY	2	0.00252207
REACTOME_NONSENSE_MEDIATED_DECAY_ENHANCED_BY_THE_EXON_JUNCTION_COMPLEX	2	0.00252207
PID_FRA_PATHWAY	2	0.00252207
REACTOME_REGULATION_OF_INSULIN_SECRETION_BY_GLUCAGON_LIKE_PEPTIDE1	2	0.00252207
SIG_IL4RECEPTOR_IN_B_LYPHOCYTES	2	0.00252207
REACTOME_CLASS_I_MHC_MEDIATED_ANTIGEN_PROCESSING_PRESENTATION	2	0.00252207
REACTOME_AXON_GUIDANCE	2	0.00252207
BIOCARTA_LONGEVITY_PATHWAY	2	0.00252207
REACTOME_ANTIGEN_PROCESSING_UBIQUITINATION_PROTEASOME_DEGRADATION	2	0.00252207
REACTOME_THE_NLRP3_INFLAMMASOME	2	0.00252207
ST_G_ALPHA_I_PATHWAY	2	0.00252207
BIOCARTA_TID_PATHWAY	2	0.00252207
REACTOME_ADENYLATE_CYCLASE_ACTIVATING_PATHWAY	2	0.00252207
KEGG_GAP_JUNCTION	2	0.00252207
REACTOME_DSCAM_INTERACTIONS	2	0.00252207
BIOCARTA_G2_PATHWAY	2	0.00252207
REACTOME_MAP_KINASE_ACTIVATION_IN_TLR_CASCADE	2	0.00252207
REACTOME_PROLONGED_ERK_ACTIVATION_EVENTS	2	0.00252207
KEGG_PHOSPHATIDYLINOSITOL_SIGNALING_SYSTEM	2	0.00252207
REACTOME_NRAGE_SIGNALS_DEATH_THROUGH_JNK	2	0.00252207
KEGG_GLYCOSAMINOGLYCAN_BIOSYNTHESIS_CHONDROITIN_SULFATE	2	0.00252207
REACTOME_SIGNALLING_TO_RAS	2	0.00252207
BIOCARTA_VIP_PATHWAY	2	0.00252207
REACTOME_CELL_CYCLE_MITOTIC	2	0.00252207
KEGG_NOD_LIKE_RECEPTOR_SIGNALING_PATHWAY	2	0.00252207
REACTOME_ASPARAGINE_N_LINKED_GLYCOSYLATION	2	0.00252207
KEGG_AMINOACYL_TRNA_BIOSYNTHESIS	2	0.00252207
REACTOME_INNATE_IMMUNE_SYSTEM	2	0.00252207
KEGG_DORSO_VENTRAL_AXIS_FORMATION	2	0.00252207
BIOCARTA_PML_PATHWAY	2	0.00252207
BIOCARTA_MTA3_PATHWAY	2	0.00252207
REACTOME_REGULATION_OF_ORNITHINE_DECARBOXYLASE_ODC	2	0.00252207
PID_BETACATENIN_DEG_PATHWAY	2	0.00252207
BIOCARTA_VEGF_PATHWAY	1	0.00126103
PID_CASPASE_PATHWAY	1	0.00126103
PID_NEPHRIN_NEPH1_PATHWAY	1	0.00126103
KEGG_VASCULAR_SMOOTH_MUSCLE_CONTRACTION	1	0.00126103
BIOCARTA_P27_PATHWAY	1	0.00126103
KEGG_PARKINSONS_DISEASE	1	0.00126103
PID_ERBB2ERBB3PATHWAY	1	0.00126103
BIOCARTA_NO1_PATHWAY	1	0.00126103
KEGG_ACUTE_MYELOID_LEUKEMIA	1	0.00126103
BIOCARTA_TEL_PATHWAY	1	0.00126103
REACTOME_PRE_NOTCH_TRANSCRIPTION_AND_TRANSLATION	1	0.00126103
REACTOME_REGULATION_OF_INSULIN_SECRETION	1	0.00126103
REACTOME_REGULATION_OF_RHEB_GTPASE_ACTIVITY_BY_AMPK	1	0.00126103
REACTOME_GENERIC_TRANSCRIPTION_PATHWAY	1	0.00126103
REACTOME_DOWNSTREAM_SIGNALING_EVENTS_OF_B_CELL_RECEPTOR_BCR	1	0.00126103
BIOCARTA_PDGF_PATHWAY	1	0.00126103
BIOCARTA_DEATH_PATHWAY	1	0.00126103
BIOCARTA_ARENRF2_PATHWAY	1	0.00126103
BIOCARTA_GH_PATHWAY	1	0.00126103
PID_DELTANP63PATHWAY	1	0.00126103
REACTOME_TRAF6_MEDIATED_NFKB_ACTIVATION	1	0.00126103
BIOCARTA_BARRESTIN_SRC_PATHWAY	1	0.00126103
REACTOME_THROMBIN_SIGNALLING_THROUGH_PROTEINASE_ACTIVATED_RECEPTORS_PARS	1	0.00126103
BIOCARTA_NFKB_PATHWAY	1	0.00126103
BIOCARTA_CD40_PATHWAY	1	0.00126103
REACTOME_ANTIGEN_ACTIVATES_B_CELL_RECEPTOR_LEADING_TO_GENERATION_OF_SECOND_MESSENGERS	1	0.00126103
PID_AURORA_A_PATHWAY	1	0.00126103
PID_CD40_PATHWAY	1	0.00126103
REACTOME_PI_METABOLISM	1	0.00126103
REACTOME_PKA_MEDIATED_PHOSPHORYLATION_OF_CREB	1	0.00126103
KEGG_CELL_ADHESION_MOLECULES_CAMS	1	0.00126103
BIOCARTA_SPRY_PATHWAY	1	0.00126103
KEGG_TOLL_LIKE_RECEPTOR_SIGNALING_PATHWAY	1	0.00126103
PID_AVB3_OPN_PATHWAY	1	0.00126103
REACTOME_POST_TRANSLATIONAL_MODIFICATION_SYNTHESIS_OF_GPI_ANCHORED_PROTEINS	1	0.00126103
BIOCARTA_ERK5_PATHWAY	1	0.00126103
KEGG_NATURAL_KILLER_CELL_MEDIATED_CYTOTOXICITY	1	0.00126103
KEGG_RNA_DEGRADATION	1	0.00126103
BIOCARTA_PAR1_PATHWAY	1	0.00126103
KEGG_ANTIGEN_PROCESSING_AND_PRESENTATION	1	0.00126103
BIOCARTA_TRKA_PATHWAY	1	0.00126103
PID_HDAC_CLASSII_PATHWAY	1	0.00126103
BIOCARTA_CDMAC_PATHWAY	1	0.00126103
REACTOME_METABOLISM_OF_PROTEINS	1	0.00126103
REACTOME_G2_M_DNA_DAMAGE_CHECKPOINT	1	0.00126103
REACTOME_MRNA_SPLICING_MINOR_PATHWAY	1	0.00126103
SA_G1_AND_S_PHASES	1	0.00126103
REACTOME_METAL_ION_SLC_TRANSPORTERS	1	0.00126103
REACTOME_PHOSPHOLIPASE_C_MEDIATED_CASCADE	1	0.00126103
REACTOME_NEUROTRANSMITTER_RELEASE_CYCLE	1	0.00126103
BIOCARTA_SHH_PATHWAY	1	0.00126103
KEGG_VEGF_SIGNALING_PATHWAY	1	0.00126103
BIOCARTA_INTEGRIN_PATHWAY	1	0.00126103
REACTOME_KERATAN_SULFATE_KERATIN_METABOLISM	1	0.00126103
BIOCARTA_D4GDI_PATHWAY	1	0.00126103
REACTOME_ANTIGEN_PRESENTATION_FOLDING_ASSEMBLY_AND_PEPTIDE_LOADING_OF_CLASS_I_MHC	1	0.00126103
BIOCARTA_RAC1_PATHWAY	1	0.00126103
REACTOME_RAP1_SIGNALLING	1	0.00126103
BIOCARTA_ACH_PATHWAY	1	0.00126103
KEGG_CYTOKINE_CYTOKINE_RECEPTOR_INTERACTION	1	0.00126103
KEGG_SYSTEMIC_LUPUS_ERYTHEMATOSUS	1	0.00126103
BIOCARTA_ARF_PATHWAY	1	0.00126103
PID_IL6_7PATHWAY	1	0.00126103
PID_IL2_PI3KPATHWAY	1	0.00126103
REACTOME_APOPTOSIS	1	0.00126103
PID_NFAT_TFPATHWAY	1	0.00126103
REACTOME_O_LINKED_GLYCOSYLATION_OF_MUCINS	1	0.00126103
REACTOME_IL_6_SIGNALING	1	0.00126103
PID_INTEGRIN_A4B1_PATHWAY	1	0.00126103
REACTOME_BIOSYNTHESIS_OF_THE_N_GLYCAN_PRECURSOR_DOLICHOL_LIPID_LINKED_OLIGOSACCHARIDE_LLO_AND_TRANSFER_TO_A_NASCENT_PROTEIN	1	0.00126103
REACTOME_TRANSPORT_TO_THE_GOLGI_AND_SUBSEQUENT_MODIFICATION	1	0.00126103
REACTOME_SIGNAL_AMPLIFICATION	1	0.00126103
KEGG_TASTE_TRANSDUCTION	1	0.00126103
REACTOME_RESOLUTION_OF_AP_SITES_VIA_THE_SINGLE_NUCLEOTIDE_REPLACEMENT_PATHWAY	1	0.00126103
BIOCARTA_EXTRINSIC_PATHWAY	1	0.00126103
REACTOME_REGULATION_OF_INSULIN_LIKE_GROWTH_FACTOR_IGF_ACTIVITY_BY_INSULIN_LIKE_GROWTH_FACTOR_BINDING_PROTEINS_IGFBPS	1	0.00126103
PID_ERA_GENOMIC_PATHWAY	1	0.00126103
REACTOME_GLYCOSAMINOGLYCAN_METABOLISM	1	0.00126103
BIOCARTA_RAS_PATHWAY	1	0.00126103
PID_AVB3_INTEGRIN_PATHWAY	1	0.00126103
REACTOME_THROMBOXANE_SIGNALLING_THROUGH_TP_RECEPTOR	1	0.00126103
BIOCARTA_ETC_PATHWAY	1	0.00126103
REACTOME_PHOSPHOLIPID_METABOLISM	1	0.00126103
BIOCARTA_VITCB_PATHWAY	1	0.00126103
KEGG_PANCREATIC_CANCER	1	0.00126103
REACTOME_ACYL_CHAIN_REMODELLING_OF_PC	1	0.00126103
REACTOME_ACYL_CHAIN_REMODELLING_OF_PE	1	0.00126103
PID_PRLSIGNALINGEVENTSPATHWAY	1	0.00126103
PID_CDC42_REG_PATHWAY	1	0.00126103
REACTOME_SPHINGOLIPID_DE_NOVO_BIOSYNTHESIS	1	0.00126103
KEGG_CALCIUM_SIGNALING_PATHWAY	1	0.00126103
REACTOME_ABORTIVE_ELONGATION_OF_HIV1_TRANSCRIPT_IN_THE_ABSENCE_OF_TAT	1	0.00126103
BIOCARTA_CERAMIDE_PATHWAY	1	0.00126103
BIOCARTA_CSK_PATHWAY	1	0.00126103
REACTOME_GLUCOSE_TRANSPORT	1	0.00126103
KEGG_COMPLEMENT_AND_COAGULATION_CASCADES	1	0.00126103
BIOCARTA_CHEMICAL_PATHWAY	1	0.00126103
BIOCARTA_HIVNEF_PATHWAY	1	0.00126103
PID_NOTCH_PATHWAY	1	0.00126103
REACTOME_SIGNALING_BY_ILS	1	0.00126103
REACTOME_TRANSCRIPTION	1	0.00126103
REACTOME_CYCLIN_A_B1_ASSOCIATED_EVENTS_DURING_G2_M_TRANSITION	1	0.00126103
BIOCARTA_NGF_PATHWAY	1	0.00126103
PID_WNT_NONCANONICAL_PATHWAY	1	0.00126103
REACTOME_SYNTHESIS_OF_PIPS_AT_THE_GOLGI_MEMBRANE	1	0.00126103
REACTOME_CTLA4_INHIBITORY_SIGNALING	1	0.00126103
REACTOME_NA_CL_DEPENDENT_NEUROTRANSMITTER_TRANSPORTERS	1	0.00126103
PID_HEDGEHOG_GLIPATHWAY	1	0.00126103
KEGG_TYPE_II_DIABETES_MELLITUS	1	0.00126103
PID_IFNGPATHWAY	1	0.00126103
PID_A6B1_A6B4_INTEGRIN_PATHWAY	1	0.00126103
REACTOME_NUCLEAR_EVENTS_KINASE_AND_TRANSCRIPTION_FACTOR_ACTIVATION	1	0.00126103
BIOCARTA_AGR_PATHWAY	1	0.00126103
BIOCARTA_IGF1R_PATHWAY	1	0.00126103
PID_ECADHERIN_STABILIZATION_PATHWAY	1	0.00126103
BIOCARTA_EGFR_SMRTE_PATHWAY	1	0.00126103
REACTOME_RIG_I_MDA5_MEDIATED_INDUCTION_OF_IFN_ALPHA_BETA_PATHWAYS	1	0.00126103
REACTOME_HOST_INTERACTIONS_OF_HIV_FACTORS	1	0.00126103
REACTOME_INTEGRATION_OF_PROVIRUS	1	0.00126103
REACTOME_METABOLISM_OF_CARBOHYDRATES	1	0.00126103
REACTOME_SIGNALING_BY_NODAL	1	0.00126103
BIOCARTA_CXCR4_PATHWAY	1	0.00126103
KEGG_PYRUVATE_METABOLISM	1	0.00126103
BIOCARTA_EDG1_PATHWAY	1	0.00126103
REACTOME_DCC_MEDIATED_ATTRACTIVE_SIGNALING	1	0.00126103
REACTOME_ACTIVATION_OF_CHAPERONE_GENES_BY_ATF6_ALPHA	1	0.00126103
REACTOME_GAP_JUNCTION_TRAFFICKING	1	0.00126103
BIOCARTA_ERYTH_PATHWAY	1	0.00126103
PID_FOXM1PATHWAY	1	0.00126103
REACTOME_PLC_BETA_MEDIATED_EVENTS	1	0.00126103
REACTOME_GPCR_DOWNSTREAM_SIGNALING	1	0.00126103
REACTOME_APOPTOSIS_INDUCED_DNA_FRAGMENTATION	1	0.00126103
REACTOME_AMINE_COMPOUND_SLC_TRANSPORTERS	1	0.00126103
KEGG_LYSOSOME	1	0.00126103
REACTOME_HIV_INFECTION	1	0.00126103
REACTOME_MRNA_DECAY_BY_5_TO_3_EXORIBONUCLEASE	1	0.00126103
REACTOME_CGMP_EFFECTS	1	0.00126103
KEGG_BUTANOATE_METABOLISM	1	0.00126103
PID_ENDOTHELINPATHWAY	1	0.00126103
REACTOME_SPHINGOLIPID_METABOLISM	1	0.00126103
BIOCARTA_GATA3_PATHWAY	1	0.00126103
KEGG_GLYCEROPHOSPHOLIPID_METABOLISM	1	0.00126103
KEGG_RNA_POLYMERASE	1	0.00126103
PID_BARD1PATHWAY	1	0.00126103
REACTOME_SEMA3A_PAK_DEPENDENT_AXON_REPULSION	1	0.00126103
PID_AJDISS_2PATHWAY	1	0.00126103
BIOCARTA_PARKIN_PATHWAY	1	0.00126103
BIOCARTA_IL7_PATHWAY	1	0.00126103
BIOCARTA_IL12_PATHWAY	1	0.00126103
PID_ANGIOPOIETINRECEPTOR_PATHWAY	1	0.00126103
ST_T_CELL_SIGNAL_TRANSDUCTION	1	0.00126103
KEGG_ADIPOCYTOKINE_SIGNALING_PATHWAY	1	0.00126103
REACTOME_P53_DEPENDENT_G1_DNA_DAMAGE_RESPONSE	1	0.00126103
PID_ALK2PATHWAY	1	0.00126103
REACTOME_CHONDROITIN_SULFATE_DERMATAN_SULFATE_METABOLISM	1	0.00126103
BIOCARTA_SKP2E2F_PATHWAY	1	0.00126103
REACTOME_MITOTIC_G1_G1_S_PHASES	1	0.00126103
BIOCARTA_EGF_PATHWAY	1	0.00126103
BIOCARTA_CARM1_PATHWAY	1	0.00126103
REACTOME_CDK_MEDIATED_PHOSPHORYLATION_AND_REMOVAL_OF_CDC6	1	0.00126103
REACTOME_G_PROTEIN_BETA_GAMMA_SIGNALLING	1	0.00126103
PID_CXCR3PATHWAY	1	0.00126103
BIOCARTA_PS1_PATHWAY	1	0.00126103
ST_GA13_PATHWAY	1	0.00126103
REACTOME_SIGNALING_BY_ERBB4	1	0.00126103
REACTOME_SIGNALING_BY_NOTCH	1	0.00126103
REACTOME_LATENT_INFECTION_OF_HOMO_SAPIENS_WITH_MYCOBACTERIUM_TUBERCULOSIS	1	0.00126103
REACTOME_MITOCHONDRIAL_TRNA_AMINOACYLATION	1	0.00126103
BIOCARTA_IGF1_PATHWAY	1	0.00126103
REACTOME_E2F_ENABLED_INHIBITION_OF_PRE_REPLICATION_COMPLEX_FORMATION	1	0.00126103
PID_VEGF_VEGFR_PATHWAY	1	0.00126103
REACTOME_HORMONE_SENSITIVE_LIPASE_HSL_MEDIATED_TRIACYLGLYCEROL_HYDROLYSIS	1	0.00126103
ST_ADRENERGIC	1	0.00126103
REACTOME_KERATAN_SULFATE_BIOSYNTHESIS	1	0.00126103
REACTOME_RIP_MEDIATED_NFKB_ACTIVATION_VIA_DAI	1	0.00126103
BIOCARTA_TOB1_PATHWAY	1	0.00126103
REACTOME_N_GLYCAN_ANTENNAE_ELONGATION_IN_THE_MEDIAL_TRANS_GOLGI	1	0.00126103
SA_G2_AND_M_PHASES	1	0.00126103
KEGG_ECM_RECEPTOR_INTERACTION	1	0.00126103
PID_S1P_S1P4_PATHWAY	1	0.00126103
REACTOME_REGULATION_OF_SIGNALING_BY_CBL	1	0.00126103
PID_THROMBIN_PAR4_PATHWAY	1	0.00126103
REACTOME_INHIBITION_OF_REPLICATION_INITIATION_OF_DAMAGED_DNA_BY_RB1_E2F1	1	0.00126103
KEGG_NON_SMALL_CELL_LUNG_CANCER	1	0.00126103
PID_EPHA2_FWDPATHWAY	1	0.00126103
PID_BMPPATHWAY	1	0.00126103
BIOCARTA_CDK5_PATHWAY	1	0.00126103
REACTOME_EARLY_PHASE_OF_HIV_LIFE_CYCLE	1	0.00126103
REACTOME_TGF_BETA_RECEPTOR_SIGNALING_ACTIVATES_SMADS	1	0.00126103
BIOCARTA_BAD_PATHWAY	1	0.00126103
REACTOME_DAG_AND_IP3_SIGNALING	1	0.00126103
REACTOME_SIGNALING_BY_GPCR	1	0.00126103
REACTOME_SIGNALING_BY_FGFR1_FUSION_MUTANTS	1	0.00126103
REACTOME_DEVELOPMENTAL_BIOLOGY	1	0.00126103
REACTOME_RECRUITMENT_OF_NUMA_TO_MITOTIC_CENTROSOMES	1	0.00126103
PID_S1P_S1P2_PATHWAY	1	0.00126103
REACTOME_APOPTOTIC_EXECUTION_PHASE	1	0.00126103
KEGG_PROGESTERONE_MEDIATED_OOCYTE_MATURATION	1	0.00126103
REACTOME_DEADENYLATION_DEPENDENT_MRNA_DECAY	1	0.00126103
REACTOME_OLFACTORY_SIGNALING_PATHWAY	1	0.00126103
BIOCARTA_ATM_PATHWAY	1	0.00126103
REACTOME_DESTABILIZATION_OF_MRNA_BY_TRISTETRAPROLIN_TTP	1	0.00126103
PID_S1P_S1P3_PATHWAY	1	0.00126103
BIOCARTA_TNFR1_PATHWAY	1	0.00126103
REACTOME_GLYCOSPHINGOLIPID_METABOLISM	1	0.00126103
KEGG_TAURINE_AND_HYPOTAURINE_METABOLISM	1	0.00126103
REACTOME_CLEAVAGE_OF_GROWING_TRANSCRIPT_IN_THE_TERMINATION_REGION_	1	0.00126103
REACTOME_INFLUENZA_LIFE_CYCLE	1	0.00126103
REACTOME_TAK1_ACTIVATES_NFKB_BY_PHOSPHORYLATION_AND_ACTIVATION_OF_IKKS_COMPLEX	1	0.00126103
PID_NFKAPPABATYPICALPATHWAY	1	0.00126103
ST_GRANULE_CELL_SURVIVAL_PATHWAY	1	0.00126103
PID_ATM_PATHWAY	1	0.00126103
BIOCARTA_AKT_PATHWAY	1	0.00126103
REACTOME_NUCLEAR_SIGNALING_BY_ERBB4	1	0.00126103
REACTOME_RESOLUTION_OF_AP_SITES_VIA_THE_MULTIPLE_NUCLEOTIDE_PATCH_REPLACEMENT_PATHWAY	1	0.00126103
BIOCARTA_FMLP_PATHWAY	1	0.00126103
REACTOME_FORMATION_OF_THE_HIV1_EARLY_ELONGATION_COMPLEX	1	0.00126103
REACTOME_MEMBRANE_BINDING_AND_TARGETTING_OF_GAG_PROTEINS	1	0.00126103
PID_RXR_VDR_PATHWAY	1	0.00126103
REACTOME_MRNA_3_END_PROCESSING	1	0.00126103
BIOCARTA_RAB_PATHWAY	1	0.00126103
REACTOME_NEPHRIN_INTERACTIONS	1	0.00126103
KEGG_PROTEASOME	1	0.00126103
KEGG_HEMATOPOIETIC_CELL_LINEAGE	1	0.00126103
REACTOME_BASE_FREE_SUGAR_PHOSPHATE_REMOVAL_VIA_THE_SINGLE_NUCLEOTIDE_REPLACEMENT_PATHWAY	1	0.00126103
KEGG_INOSITOL_PHOSPHATE_METABOLISM	1	0.00126103
KEGG_NICOTINATE_AND_NICOTINAMIDE_METABOLISM	1	0.00126103
REACTOME_AMINO_ACID_TRANSPORT_ACROSS_THE_PLASMA_MEMBRANE	1	0.00126103
REACTOME_AKT_PHOSPHORYLATES_TARGETS_IN_THE_CYTOSOL	1	0.00126103
PID_WNT_CANONICAL_PATHWAY	1	0.00126103
KEGG_NUCLEOTIDE_EXCISION_REPAIR	1	0.00126103
REACTOME_SIGNALING_BY_FGFR1_MUTANTS	1	0.00126103
REACTOME_CD28_CO_STIMULATION	1	0.00126103
KEGG_BLADDER_CANCER	1	0.00126103
PID_IL8CXCR1_PATHWAY	1	0.00126103
KEGG_SPLICEOSOME	1	0.00126103
PID_CD8TCRDOWNSTREAMPATHWAY	1	0.00126103
BIOCARTA_NDKDYNAMIN_PATHWAY	1	0.00126103
REACTOME_SIGNALLING_TO_P38_VIA_RIT_AND_RIN	1	0.00126103
REACTOME_NOTCH_HLH_TRANSCRIPTION_PATHWAY	1	0.00126103
REACTOME_ANTIVIRAL_MECHANISM_BY_IFN_STIMULATED_GENES	1	0.00126103
REACTOME_NETRIN1_SIGNALING	1	0.00126103
REACTOME_DOUBLE_STRAND_BREAK_REPAIR	1	0.00126103
BIOCARTA_NKCELLS_PATHWAY	1	0.00126103
REACTOME_S_PHASE	1	0.00126103
PID_SHP2_PATHWAY	1	0.00126103
REACTOME_PERK_REGULATED_GENE_EXPRESSION	1	0.00126103
REACTOME_PURINE_SALVAGE	1	0.00126103
ST_G_ALPHA_S_PATHWAY	1	0.00126103
KEGG_B_CELL_RECEPTOR_SIGNALING_PATHWAY	1	0.00126103
REACTOME_FORMATION_OF_TRANSCRIPTION_COUPLED_NER_TC_NER_REPAIR_COMPLEX	1	0.00126103
REACTOME_ACTIVATION_OF_RAC	1	0.00126103
PID_ARF6DOWNSTREAMPATHWAY	1	0.00126103
REACTOME_PURINE_METABOLISM	1	0.00126103
REACTOME_NUCLEAR_RECEPTOR_TRANSCRIPTION_PATHWAY	1	0.00126103
KEGG_HUNTINGTONS_DISEASE	1	0.00126103
REACTOME_LYSOSOME_VESICLE_BIOGENESIS	1	0.00126103
PID_FASPATHWAY	1	0.00126103
KEGG_LEUKOCYTE_TRANSENDOTHELIAL_MIGRATION	1	0.00126103
BIOCARTA_TALL1_PATHWAY	1	0.00126103
REACTOME_RESPONSE_TO_ELEVATED_PLATELET_CYTOSOLIC_CA2_	1	0.00126103
REACTOME_REGULATION_OF_MRNA_STABILITY_BY_PROTEINS_THAT_BIND_AU_RICH_ELEMENTS	1	0.00126103
BIOCARTA_HDAC_PATHWAY	1	0.00126103
REACTOME_IL1_SIGNALING	1	0.00126103
REACTOME_IL_2_SIGNALING	1	0.00126103
REACTOME_SIGNALLING_TO_ERKS	1	0.00126103
REACTOME_REGULATION_OF_KIT_SIGNALING	1	0.00126103
KEGG_ENDOMETRIAL_CANCER	1	0.00126103
REACTOME_RNA_POL_III_CHAIN_ELONGATION	1	0.00126103
REACTOME_INTRINSIC_PATHWAY_FOR_APOPTOSIS	1	0.00126103
PID_AR_TF_PATHWAY	1	0.00126103
REACTOME_GLUCAGON_TYPE_LIGAND_RECEPTORS	1	0.00126103
REACTOME_SIGNALING_BY_FGFR_MUTANTS	1	0.00126103
REACTOME_GLYCOGEN_BREAKDOWN_GLYCOGENOLYSIS	1	0.00126103
REACTOME_SEMA4D_IN_SEMAPHORIN_SIGNALING	1	0.00126103
REACTOME_ACTIVATION_OF_KAINATE_RECEPTORS_UPON_GLUTAMATE_BINDING	1	0.00126103
REACTOME_PRE_NOTCH_PROCESSING_IN_GOLGI	1	0.00126103
PID_ATF2_PATHWAY	1	0.00126103
REACTOME_AUTODEGRADATION_OF_CDH1_BY_CDH1_APC_C	1	0.00126103
PID_HIVNEFPATHWAY	1	0.00126103
BIOCARTA_GLEEVEC_PATHWAY	1	0.00126103
KEGG_GLYCOSPHINGOLIPID_BIOSYNTHESIS_GANGLIO_SERIES	1	0.00126103
REACTOME_GLUCAGON_SIGNALING_IN_METABOLIC_REGULATION	1	0.00126103
PID_AURORA_B_PATHWAY	1	0.00126103
REACTOME_PI3K_EVENTS_IN_ERBB2_SIGNALING	1	0.00126103
REACTOME_MITOTIC_PROMETAPHASE	1	0.00126103
ST_GA12_PATHWAY	1	0.00126103
REACTOME_AQUAPORIN_MEDIATED_TRANSPORT	1	0.00126103
BIOCARTA_CBL_PATHWAY	1	0.00126103
REACTOME_VIRAL_MESSENGER_RNA_SYNTHESIS	1	0.00126103
REACTOME_ELEVATION_OF_CYTOSOLIC_CA2_LEVELS	1	0.00126103
REACTOME_PLATELET_CALCIUM_HOMEOSTASIS	1	0.00126103
REACTOME_GAB1_SIGNALOSOME	1	0.00126103
REACTOME_METABOLISM_OF_VITAMINS_AND_COFACTORS	1	0.00126103
REACTOME_SIGNALING_BY_THE_B_CELL_RECEPTOR_BCR	1	0.00126103
REACTOME_NEURONAL_SYSTEM	1	0.00126103
REACTOME_PROSTACYCLIN_SIGNALLING_THROUGH_PROSTACYCLIN_RECEPTOR	1	0.00126103
BIOCARTA_GSK3_PATHWAY	1	0.00126103
REACTOME_SMAD2_SMAD3_SMAD4_HETEROTRIMER_REGULATES_TRANSCRIPTION	1	0.00126103
REACTOME_PURINE_RIBONUCLEOSIDE_MONOPHOSPHATE_BIOSYNTHESIS	1	0.00126103
PID_GMCSF_PATHWAY	1	0.00126103
BIOCARTA_PLCE_PATHWAY	1	0.00126103
REACTOME_OTHER_SEMAPHORIN_INTERACTIONS	1	0.00126103
BIOCARTA_NTHI_PATHWAY	1	0.00126103
REACTOME_ACTIVATION_OF_NMDA_RECEPTOR_UPON_GLUTAMATE_BINDING_AND_POSTSYNAPTIC_EVENTS	1	0.00126103

## Sheet: connection of Lost cePathways
pathway	degree	norm_degree
KEGG_MELANOGENESIS	48	0.0790774
BIOCARTA_PTDINS_PATHWAY	44	0.0724876
BIOCARTA_TCR_PATHWAY	29	0.0477759
REACTOME_TGF_BETA_RECEPTOR_SIGNALING_ACTIVATES_SMADS	28	0.0461285
PID_IGF1_PATHWAY	26	0.0428336
PID_ECADHERIN_NASCENTAJ_PATHWAY	24	0.0395387
PID_CDC42_PATHWAY	24	0.0395387
KEGG_ADHERENS_JUNCTION	22	0.0362438
PID_KITPATHWAY	21	0.0345964
PID_INSULIN_PATHWAY	20	0.0329489
KEGG_VASOPRESSIN_REGULATED_WATER_REABSORPTION	20	0.0329489
PID_AJDISS_2PATHWAY	19	0.0313015
PID_NETRIN_PATHWAY	19	0.0313015
SIG_INSULIN_RECEPTOR_PATHWAY_IN_CARDIAC_MYOCYTES	17	0.0280066
REACTOME_SEMA3A_PLEXIN_REPULSION_SIGNALING_BY_INHIBITING_INTEGRIN_ADHESION	17	0.0280066
REACTOME_OPIOID_SIGNALLING	16	0.0263591
PID_NCADHERINPATHWAY	16	0.0263591
KEGG_AMINO_SUGAR_AND_NUCLEOTIDE_SUGAR_METABOLISM	14	0.0230643
BIOCARTA_CHREBP2_PATHWAY	14	0.0230643
REACTOME_DOWNREGULATION_OF_SMAD2_3_SMAD4_TRANSCRIPTIONAL_ACTIVITY	14	0.0230643
REACTOME_DOWNREGULATION_OF_TGF_BETA_RECEPTOR_SIGNALING	14	0.0230643
PID_VEGFR1_PATHWAY	13	0.0214168
REACTOME_SIGNALING_BY_TGF_BETA_RECEPTOR_COMPLEX	13	0.0214168
BIOCARTA_RAB_PATHWAY	13	0.0214168
PID_ERBB1_RECEPTOR_PROXIMAL_PATHWAY	12	0.0197694
PID_ER_NONGENOMIC_PATHWAY	12	0.0197694
REACTOME_CTLA4_INHIBITORY_SIGNALING	12	0.0197694
PID_AMB2_NEUTROPHILS_PATHWAY	12	0.0197694
PID_BETACATENIN_NUC_PATHWAY	12	0.0197694
REACTOME_MYOGENESIS	12	0.0197694
BIOCARTA_AT1R_PATHWAY	12	0.0197694
PID_HIF1_TFPATHWAY	11	0.0181219
ST_PHOSPHOINOSITIDE_3_KINASE_PATHWAY	11	0.0181219
PID_CMYB_PATHWAY	11	0.0181219
PID_PDGFRBPATHWAY	11	0.0181219
REACTOME_NETRIN1_SIGNALING	11	0.0181219
SIG_PIP3_SIGNALING_IN_CARDIAC_MYOCTES	10	0.0164745
KEGG_LONG_TERM_POTENTIATION	10	0.0164745
REACTOME_TRANSCRIPTIONAL_ACTIVITY_OF_SMAD2_SMAD3_SMAD4_HETEROTRIMER	10	0.0164745
REACTOME_REGULATION_OF_KIT_SIGNALING	10	0.0164745
REACTOME_SIGNALING_BY_ROBO_RECEPTOR	9	0.014827
PID_NOTCH_PATHWAY	9	0.014827
BIOCARTA_PYK2_PATHWAY	9	0.014827
PID_EPHBFWDPATHWAY	9	0.014827
PID_AR_TF_PATHWAY	9	0.014827
PID_PI3KPLCTRKPATHWAY	9	0.014827
KEGG_ACUTE_MYELOID_LEUKEMIA	8	0.0131796
PID_TRKRPATHWAY	8	0.0131796
KEGG_LONG_TERM_DEPRESSION	8	0.0131796
PID_GLYPICAN_1PATHWAY	8	0.0131796
REACTOME_SYNTHESIS_OF_PIPS_AT_THE_GOLGI_MEMBRANE	8	0.0131796
KEGG_OOCYTE_MEIOSIS	8	0.0131796
PID_UPA_UPAR_PATHWAY	8	0.0131796
PID_AR_PATHWAY	7	0.0115321
PID_LIS1PATHWAY	7	0.0115321
BIOCARTA_ALK_PATHWAY	7	0.0115321
BIOCARTA_MEF2D_PATHWAY	7	0.0115321
REACTOME_GOLGI_ASSOCIATED_VESICLE_BIOGENESIS	7	0.0115321
BIOCARTA_GPCR_PATHWAY	7	0.0115321
REACTOME_ADENYLATE_CYCLASE_INHIBITORY_PATHWAY	7	0.0115321
REACTOME_REGULATION_OF_HYPOXIA_INDUCIBLE_FACTOR_HIF_BY_OXYGEN	7	0.0115321
PID_RB_1PATHWAY	7	0.0115321
REACTOME_ADENYLATE_CYCLASE_ACTIVATING_PATHWAY	7	0.0115321
REACTOME_P130CAS_LINKAGE_TO_MAPK_SIGNALING_FOR_INTEGRINS	7	0.0115321
KEGG_COLORECTAL_CANCER	6	0.00988468
BIOCARTA_EIF_PATHWAY	6	0.00988468
BIOCARTA_TGFB_PATHWAY	6	0.00988468
REACTOME_CIRCADIAN_CLOCK	6	0.00988468
BIOCARTA_MAPK_PATHWAY	6	0.00988468
PID_PI3KCIAKTPATHWAY	6	0.00988468
REACTOME_ENERGY_DEPENDENT_REGULATION_OF_MTOR_BY_LKB1_AMPK	6	0.00988468
REACTOME_ORC1_REMOVAL_FROM_CHROMATIN	6	0.00988468
BIOCARTA_PGC1A_PATHWAY	6	0.00988468
SIG_CHEMOTAXIS	6	0.00988468
REACTOME_PLATELET_AGGREGATION_PLUG_FORMATION	6	0.00988468
KEGG_GLYCEROLIPID_METABOLISM	6	0.00988468
PID_FGF_PATHWAY	6	0.00988468
PID_FAK_PATHWAY	6	0.00988468
REACTOME_DOWNSTREAM_SIGNALING_OF_ACTIVATED_FGFR	6	0.00988468
REACTOME_ACTIVATED_AMPK_STIMULATES_FATTY_ACID_OXIDATION_IN_MUSCLE	6	0.00988468
REACTOME_SIGNALING_BY_HIPPO	6	0.00988468
REACTOME_COPI_MEDIATED_TRANSPORT	6	0.00988468
PID_TGFBRPATHWAY	6	0.00988468
ST_G_ALPHA_S_PATHWAY	6	0.00988468
KEGG_GNRH_SIGNALING_PATHWAY	6	0.00988468
REACTOME_N_GLYCAN_TRIMMING_IN_THE_ER_AND_CALNEXIN_CALRETICULIN_CYCLE	6	0.00988468
REACTOME_SIGNALING_BY_BMP	5	0.00823723
REACTOME_IRON_UPTAKE_AND_TRANSPORT	5	0.00823723
PID_IL27PATHWAY	5	0.00823723
PID_SMAD2_3PATHWAY	5	0.00823723
PID_SYNDECAN_4_PATHWAY	5	0.00823723
KEGG_TGF_BETA_SIGNALING_PATHWAY	5	0.00823723
REACTOME_CHYLOMICRON_MEDIATED_LIPID_TRANSPORT	5	0.00823723
PID_IL3_PATHWAY	5	0.00823723
REACTOME_AUTODEGRADATION_OF_CDH1_BY_CDH1_APC_C	5	0.00823723
PID_RHOA_PATHWAY	5	0.00823723
REACTOME_PLC_BETA_MEDIATED_EVENTS	5	0.00823723
KEGG_AXON_GUIDANCE	5	0.00823723
REACTOME_APOPTOSIS_INDUCED_DNA_FRAGMENTATION	5	0.00823723
PID_PI3KCIPATHWAY	5	0.00823723
BIOCARTA_UCALPAIN_PATHWAY	5	0.00823723
REACTOME_SEMA3A_PAK_DEPENDENT_AXON_REPULSION	5	0.00823723
PID_P38ALPHABETAPATHWAY	5	0.00823723
REACTOME_SIGNALING_BY_FGFR_IN_DISEASE	5	0.00823723
REACTOME_TRANSFERRIN_ENDOCYTOSIS_AND_RECYCLING	5	0.00823723
REACTOME_G_ALPHA_I_SIGNALLING_EVENTS	5	0.00823723
REACTOME_SIGNALING_BY_ERBB2	5	0.00823723
KEGG_INSULIN_SIGNALING_PATHWAY	5	0.00823723
PID_AP1_PATHWAY	5	0.00823723
BIOCARTA_IL3_PATHWAY	5	0.00823723
REACTOME_GRB2_SOS_PROVIDES_LINKAGE_TO_MAPK_SIGNALING_FOR_INTERGRINS_	5	0.00823723
REACTOME_INTEGRIN_ALPHAIIB_BETA3_SIGNALING	5	0.00823723
BIOCARTA_NDKDYNAMIN_PATHWAY	5	0.00823723
BIOCARTA_PROTEASOME_PATHWAY	5	0.00823723
REACTOME_RESPONSE_TO_ELEVATED_PLATELET_CYTOSOLIC_CA2_	5	0.00823723
REACTOME_RNA_POL_I_PROMOTER_OPENING	5	0.00823723
REACTOME_GLUCAGON_SIGNALING_IN_METABOLIC_REGULATION	5	0.00823723
KEGG_WNT_SIGNALING_PATHWAY	5	0.00823723
REACTOME_FORMATION_OF_THE_TERNARY_COMPLEX_AND_SUBSEQUENTLY_THE_43S_COMPLEX	5	0.00823723
PID_NFAT_3PATHWAY	5	0.00823723
KEGG_NEUROTROPHIN_SIGNALING_PATHWAY	4	0.00658979
KEGG_RENAL_CELL_CARCINOMA	4	0.00658979
REACTOME_SIGNAL_ATTENUATION	4	0.00658979
PID_ECADHERIN_KERATINOCYTE_PATHWAY	4	0.00658979
BIOCARTA_IL4_PATHWAY	4	0.00658979
REACTOME_DOWNREGULATION_OF_ERBB2_ERBB3_SIGNALING	4	0.00658979
REACTOME_DOWNSTREAM_SIGNAL_TRANSDUCTION	4	0.00658979
REACTOME_HEPARAN_SULFATE_HEPARIN_HS_GAG_METABOLISM	4	0.00658979
REACTOME_PHOSPHOLIPID_METABOLISM	4	0.00658979
REACTOME_GLYCEROPHOSPHOLIPID_BIOSYNTHESIS	4	0.00658979
KEGG_CALCIUM_SIGNALING_PATHWAY	4	0.00658979
KEGG_GLUTATHIONE_METABOLISM	4	0.00658979
BIOCARTA_CARM_ER_PATHWAY	4	0.00658979
REACTOME_SEMA4D_INDUCED_CELL_MIGRATION_AND_GROWTH_CONE_COLLAPSE	4	0.00658979
PID_BMPPATHWAY	4	0.00658979
PID_INSULIN_GLUCOSE_PATHWAY	4	0.00658979
BIOCARTA_PARKIN_PATHWAY	4	0.00658979
BIOCARTA_IL7_PATHWAY	4	0.00658979
REACTOME_GABA_RECEPTOR_ACTIVATION	4	0.00658979
KEGG_GLIOMA	4	0.00658979
REACTOME_SHC_MEDIATED_CASCADE	4	0.00658979
REACTOME_GABA_B_RECEPTOR_ACTIVATION	4	0.00658979
REACTOME_INTEGRATION_OF_ENERGY_METABOLISM	4	0.00658979
REACTOME_CD28_DEPENDENT_VAV1_PATHWAY	4	0.00658979
REACTOME_TRANS_GOLGI_NETWORK_VESICLE_BUDDING	4	0.00658979
KEGG_HYPERTROPHIC_CARDIOMYOPATHY_HCM	4	0.00658979
REACTOME_REGULATION_OF_AMPK_ACTIVITY_VIA_LKB1	4	0.00658979
REACTOME_NUCLEAR_RECEPTOR_TRANSCRIPTION_PATHWAY	4	0.00658979
KEGG_NICOTINATE_AND_NICOTINAMIDE_METABOLISM	4	0.00658979
REACTOME_TERMINATION_OF_O_GLYCAN_BIOSYNTHESIS	4	0.00658979
REACTOME_SIGNALING_BY_RHO_GTPASES	4	0.00658979
KEGG_PORPHYRIN_AND_CHLOROPHYLL_METABOLISM	4	0.00658979
REACTOME_CLASS_I_MHC_MEDIATED_ANTIGEN_PROCESSING_PRESENTATION	4	0.00658979
REACTOME_SEMA4D_IN_SEMAPHORIN_SIGNALING	4	0.00658979
KEGG_TIGHT_JUNCTION	4	0.00658979
KEGG_P53_SIGNALING_PATHWAY	4	0.00658979
PID_SMAD2_3NUCLEARPATHWAY	4	0.00658979
REACTOME_REGULATION_OF_ORNITHINE_DECARBOXYLASE_ODC	4	0.00658979
PID_RET_PATHWAY	4	0.00658979
REACTOME_PI3K_CASCADE	3	0.00494234
REACTOME_REGULATION_OF_APOPTOSIS	3	0.00494234
REACTOME_PI_METABOLISM	3	0.00494234
REACTOME_LIPOPROTEIN_METABOLISM	3	0.00494234
REACTOME_RETROGRADE_NEUROTROPHIN_SIGNALLING	3	0.00494234
REACTOME_CYCLIN_E_ASSOCIATED_EVENTS_DURING_G1_S_TRANSITION_	3	0.00494234
REACTOME_RNA_POL_III_TRANSCRIPTION_INITIATION_FROM_TYPE_3_PROMOTER	3	0.00494234
REACTOME_ANTIGEN_PRESENTATION_FOLDING_ASSEMBLY_AND_PEPTIDE_LOADING_OF_CLASS_I_MHC	3	0.00494234
BIOCARTA_NKT_PATHWAY	3	0.00494234
KEGG_TERPENOID_BACKBONE_BIOSYNTHESIS	3	0.00494234
REACTOME_ACTIVATION_OF_RAC	3	0.00494234
REACTOME_REGULATION_OF_INSULIN_LIKE_GROWTH_FACTOR_IGF_ACTIVITY_BY_INSULIN_LIKE_GROWTH_FACTOR_BINDING_PROTEINS_IGFBPS	3	0.00494234
REACTOME_NEUROTRANSMITTER_RECEPTOR_BINDING_AND_DOWNSTREAM_TRANSMISSION_IN_THE_POSTSYNAPTIC_CELL	3	0.00494234
REACTOME_DOPAMINE_NEUROTRANSMITTER_RELEASE_CYCLE	3	0.00494234
REACTOME_IL_6_SIGNALING	3	0.00494234
REACTOME_SIGNAL_AMPLIFICATION	3	0.00494234
REACTOME_TRAF6_MEDIATED_INDUCTION_OF_TAK1_COMPLEX	3	0.00494234
PID_IL6_7PATHWAY	3	0.00494234
REACTOME_ACETYLCHOLINE_NEUROTRANSMITTER_RELEASE_CYCLE	3	0.00494234
REACTOME_CASPASE_MEDIATED_CLEAVAGE_OF_CYTOSKELETAL_PROTEINS	3	0.00494234
PID_INTEGRIN_A9B1_PATHWAY	3	0.00494234
REACTOME_GLYCOSAMINOGLYCAN_METABOLISM	3	0.00494234
BIOCARTA_RHO_PATHWAY	3	0.00494234
REACTOME_PYRUVATE_METABOLISM_AND_CITRIC_ACID_TCA_CYCLE	3	0.00494234
PID_S1P_META_PATHWAY	3	0.00494234
REACTOME_G_ALPHA1213_SIGNALLING_EVENTS	3	0.00494234
REACTOME_BMAL1_CLOCK_NPAS2_ACTIVATES_CIRCADIAN_EXPRESSION	3	0.00494234
PID_ECADHERIN_STABILIZATION_PATHWAY	3	0.00494234
REACTOME_MUSCLE_CONTRACTION	3	0.00494234
BIOCARTA_EPHA4_PATHWAY	3	0.00494234
REACTOME_METABOLISM_OF_CARBOHYDRATES	3	0.00494234
PID_HNF3BPATHWAY	3	0.00494234
BIOCARTA_CACAM_PATHWAY	3	0.00494234
REACTOME_SYNTHESIS_OF_VERY_LONG_CHAIN_FATTY_ACYL_COAS	3	0.00494234
KEGG_PROSTATE_CANCER	3	0.00494234
KEGG_UBIQUITIN_MEDIATED_PROTEOLYSIS	3	0.00494234
REACTOME_CELL_JUNCTION_ORGANIZATION	3	0.00494234
REACTOME_SPHINGOLIPID_METABOLISM	3	0.00494234
REACTOME_RAF_MAP_KINASE_CASCADE	3	0.00494234
REACTOME_PLATELET_ADHESION_TO_EXPOSED_COLLAGEN	3	0.00494234
REACTOME_THE_ROLE_OF_NEF_IN_HIV1_REPLICATION_AND_DISEASE_PATHOGENESIS	3	0.00494234
KEGG_ONE_CARBON_POOL_BY_FOLATE	3	0.00494234
KEGG_GLYCOSPHINGOLIPID_BIOSYNTHESIS_GLOBO_SERIES	3	0.00494234
PID_ALK2PATHWAY	3	0.00494234
REACTOME_GPVI_MEDIATED_ACTIVATION_CASCADE	3	0.00494234
REACTOME_SIGNALING_BY_FGFR	3	0.00494234
PID_MTOR_4PATHWAY	3	0.00494234
REACTOME_IRAK2_MEDIATED_ACTIVATION_OF_TAK1_COMPLEX_UPON_TLR7_8_OR_9_STIMULATION	3	0.00494234
BIOCARTA_ECM_PATHWAY	3	0.00494234
REACTOME_CREB_PHOSPHORYLATION_THROUGH_THE_ACTIVATION_OF_CAMKII	3	0.00494234
REACTOME_SIGNALLING_BY_NGF	3	0.00494234
REACTOME_INHIBITION_OF_REPLICATION_INITIATION_OF_DAMAGED_DNA_BY_RB1_E2F1	3	0.00494234
BIOCARTA_CDK5_PATHWAY	3	0.00494234
BIOCARTA_CALCINEURIN_PATHWAY	3	0.00494234
PID_ERBB1_INTERNALIZATION_PATHWAY	3	0.00494234
BIOCARTA_MET_PATHWAY	3	0.00494234
REACTOME_NGF_SIGNALLING_VIA_TRKA_FROM_THE_PLASMA_MEMBRANE	3	0.00494234
REACTOME_ACTIVATION_OF_KAINATE_RECEPTORS_UPON_GLUTAMATE_BINDING	3	0.00494234
PID_MYC_REPRESSPATHWAY	3	0.00494234
REACTOME_CTNNB1_PHOSPHORYLATION_CASCADE	3	0.00494234
KEGG_GLYCOSAMINOGLYCAN_BIOSYNTHESIS_HEPARAN_SULFATE	3	0.00494234
REACTOME_ANTIVIRAL_MECHANISM_BY_IFN_STIMULATED_GENES	3	0.00494234
KEGG_FC_GAMMA_R_MEDIATED_PHAGOCYTOSIS	3	0.00494234
SIG_IL4RECEPTOR_IN_B_LYPHOCYTES	3	0.00494234
REACTOME_LYSOSOME_VESICLE_BIOGENESIS	3	0.00494234
REACTOME_ERKS_ARE_INACTIVATED	3	0.00494234
PID_ERBB4_PATHWAY	3	0.00494234
REACTOME_SIGNALLING_TO_P38_VIA_RIT_AND_RIN	3	0.00494234
REACTOME_ANTIGEN_PROCESSING_UBIQUITINATION_PROTEASOME_DEGRADATION	3	0.00494234
REACTOME_IL1_SIGNALING	3	0.00494234
PID_MYC_ACTIVPATHWAY	3	0.00494234
PID_TOLL_ENDOGENOUS_PATHWAY	3	0.00494234
REACTOME_NRAGE_SIGNALS_DEATH_THROUGH_JNK	3	0.00494234
BIOCARTA_MTA3_PATHWAY	3	0.00494234
PID_ILK_PATHWAY	2	0.00329489
PID_NEPHRIN_NEPH1_PATHWAY	2	0.00329489
BIOCARTA_DREAM_PATHWAY	2	0.00329489
PID_P38ALPHABETADOWNSTREAMPATHWAY	2	0.00329489
KEGG_PARKINSONS_DISEASE	2	0.00329489
REACTOME_POST_TRANSLATIONAL_PROTEIN_MODIFICATION	2	0.00329489
KEGG_DILATED_CARDIOMYOPATHY	2	0.00329489
PID_ANTHRAXPATHWAY	2	0.00329489
PID_ERBB1_DOWNSTREAM_PATHWAY	2	0.00329489
REACTOME_PEROXISOMAL_LIPID_METABOLISM	2	0.00329489
REACTOME_ACTIVATION_OF_NF_KAPPAB_IN_B_CELLS	2	0.00329489
KEGG_ERBB_SIGNALING_PATHWAY	2	0.00329489
REACTOME_DOWNSTREAM_SIGNALING_EVENTS_OF_B_CELL_RECEPTOR_BCR	2	0.00329489
KEGG_OLFACTORY_TRANSDUCTION	2	0.00329489
PID_FOXOPATHWAY	2	0.00329489
REACTOME_SYNTHESIS_SECRETION_AND_DEACYLATION_OF_GHRELIN	2	0.00329489
REACTOME_PLATELET_SENSITIZATION_BY_LDL	2	0.00329489
REACTOME_PKA_MEDIATED_PHOSPHORYLATION_OF_CREB	2	0.00329489
KEGG_CELL_ADHESION_MOLECULES_CAMS	2	0.00329489
BIOCARTA_SPRY_PATHWAY	2	0.00329489
REACTOME_G_ALPHA_S_SIGNALLING_EVENTS	2	0.00329489
REACTOME_TGF_BETA_RECEPTOR_SIGNALING_IN_EMT_EPITHELIAL_TO_MESENCHYMAL_TRANSITION	2	0.00329489
REACTOME_HDL_MEDIATED_LIPID_TRANSPORT	2	0.00329489
KEGG_RNA_DEGRADATION	2	0.00329489
REACTOME_TRANSMISSION_ACROSS_CHEMICAL_SYNAPSES	2	0.00329489
REACTOME_METABOLISM_OF_PROTEINS	2	0.00329489
REACTOME_PHOSPHOLIPASE_C_MEDIATED_CASCADE	2	0.00329489
REACTOME_ION_CHANNEL_TRANSPORT	2	0.00329489
PID_IL8CXCR2_PATHWAY	2	0.00329489
KEGG_CYSTEINE_AND_METHIONINE_METABOLISM	2	0.00329489
BIOCARTA_TH1TH2_PATHWAY	2	0.00329489
PID_LKB1_PATHWAY	2	0.00329489
KEGG_TASTE_TRANSDUCTION	2	0.00329489
PID_RANBP2PATHWAY	2	0.00329489
REACTOME_NOREPINEPHRINE_NEUROTRANSMITTER_RELEASE_CYCLE	2	0.00329489
PID_ERA_GENOMIC_PATHWAY	2	0.00329489
REACTOME_SYNTHESIS_AND_INTERCONVERSION_OF_NUCLEOTIDE_DI_AND_TRIPHOSPHATES	2	0.00329489
PID_PDGFRAPATHWAY	2	0.00329489
REACTOME_SLC_MEDIATED_TRANSMEMBRANE_TRANSPORT	2	0.00329489
PID_THROMBIN_PAR1_PATHWAY	2	0.00329489
BIOCARTA_TNFR1_PATHWAY	2	0.00329489
PID_PRLSIGNALINGEVENTSPATHWAY	2	0.00329489
REACTOME_MITOCHONDRIAL_PROTEIN_IMPORT	2	0.00329489
REACTOME_SPHINGOLIPID_DE_NOVO_BIOSYNTHESIS	2	0.00329489
ST_GAQ_PATHWAY	2	0.00329489
REACTOME_CROSS_PRESENTATION_OF_SOLUBLE_EXOGENOUS_ANTIGENS_ENDOSOMES	2	0.00329489
BIOCARTA_CSK_PATHWAY	2	0.00329489
REACTOME_ION_TRANSPORT_BY_P_TYPE_ATPASES	2	0.00329489
REACTOME_SIGNALING_BY_EGFR_IN_CANCER	2	0.00329489
REACTOME_SIGNALING_BY_SCF_KIT	2	0.00329489
BIOCARTA_IGF1R_PATHWAY	2	0.00329489
REACTOME_KERATAN_SULFATE_KERATIN_METABOLISM	2	0.00329489
REACTOME_ABCA_TRANSPORTERS_IN_LIPID_HOMEOSTASIS	2	0.00329489
REACTOME_INHIBITION_OF_INSULIN_SECRETION_BY_ADRENALINE_NORADRENALINE	2	0.00329489
REACTOME_SEMAPHORIN_INTERACTIONS	2	0.00329489
PID_RAC1_PATHWAY	2	0.00329489
PID_MET_PATHWAY	2	0.00329489
PID_ARF6_PATHWAY	2	0.00329489
KEGG_VALINE_LEUCINE_AND_ISOLEUCINE_DEGRADATION	2	0.00329489
KEGG_ALZHEIMERS_DISEASE	2	0.00329489
PID_SYNDECAN_2_PATHWAY	2	0.00329489
REACTOME_MRNA_DECAY_BY_5_TO_3_EXORIBONUCLEASE	2	0.00329489
REACTOME_CELL_CELL_JUNCTION_ORGANIZATION	2	0.00329489
KEGG_CHRONIC_MYELOID_LEUKEMIA	2	0.00329489
PID_VEGFR1_2_PATHWAY	2	0.00329489
KEGG_ADIPOCYTOKINE_SIGNALING_PATHWAY	2	0.00329489
REACTOME_EGFR_DOWNREGULATION	2	0.00329489
REACTOME_INTEGRIN_CELL_SURFACE_INTERACTIONS	2	0.00329489
REACTOME_INSULIN_SYNTHESIS_AND_PROCESSING	2	0.00329489
REACTOME_CDK_MEDIATED_PHOSPHORYLATION_AND_REMOVAL_OF_CDC6	2	0.00329489
BIOCARTA_WNT_PATHWAY	2	0.00329489
BIOCARTA_PS1_PATHWAY	2	0.00329489
PID_S1P_S1P1_PATHWAY	2	0.00329489
BIOCARTA_SPPA_PATHWAY	2	0.00329489
KEGG_MTOR_SIGNALING_PATHWAY	2	0.00329489
REACTOME_SYNTHESIS_OF_PE	2	0.00329489
BIOCARTA_IGF1_PATHWAY	2	0.00329489
SA_G1_AND_S_PHASES	2	0.00329489
BIOCARTA_MCALPAIN_PATHWAY	2	0.00329489
PID_VEGF_VEGFR_PATHWAY	2	0.00329489
REACTOME_APOPTOTIC_CLEAVAGE_OF_CELLULAR_PROTEINS	2	0.00329489
REACTOME_REGULATION_OF_BETA_CELL_DEVELOPMENT	2	0.00329489
PID_P53DOWNSTREAMPATHWAY	2	0.00329489
BIOCARTA_PPARA_PATHWAY	2	0.00329489
KEGG_ECM_RECEPTOR_INTERACTION	2	0.00329489
REACTOME_FATTY_ACYL_COA_BIOSYNTHESIS	2	0.00329489
REACTOME_DESTABILIZATION_OF_MRNA_BY_AUF1_HNRNP_D0	2	0.00329489
REACTOME_DEGRADATION_OF_THE_EXTRACELLULAR_MATRIX	2	0.00329489
BIOCARTA_CREB_PATHWAY	2	0.00329489
REACTOME_BIOSYNTHESIS_OF_THE_N_GLYCAN_PRECURSOR_DOLICHOL_LIPID_LINKED_OLIGOSACCHARIDE_LLO_AND_TRANSFER_TO_A_NASCENT_PROTEIN	2	0.00329489
PID_INTEGRIN1_PATHWAY	2	0.00329489
REACTOME_RNA_POL_III_TRANSCRIPTION_INITIATION_FROM_TYPE_2_PROMOTER	2	0.00329489
KEGG_PROTEASOME	2	0.00329489
PID_HDAC_CLASSIII_PATHWAY	2	0.00329489
REACTOME_CALNEXIN_CALRETICULIN_CYCLE	2	0.00329489
REACTOME_CRMPS_IN_SEMA3A_SIGNALING	2	0.00329489
KEGG_ENDOCYTOSIS	2	0.00329489
REACTOME_A_TETRASACCHARIDE_LINKER_SEQUENCE_IS_REQUIRED_FOR_GAG_SYNTHESIS	2	0.00329489
REACTOME_GABA_SYNTHESIS_RELEASE_REUPTAKE_AND_DEGRADATION	2	0.00329489
REACTOME_REGULATION_OF_GLUCOKINASE_BY_GLUCOKINASE_REGULATORY_PROTEIN	2	0.00329489
BIOCARTA_SRCRPTP_PATHWAY	2	0.00329489
REACTOME_FORMATION_OF_TRANSCRIPTION_COUPLED_NER_TC_NER_REPAIR_COMPLEX	2	0.00329489
PID_EPHA_FWDPATHWAY	2	0.00329489
KEGG_ANTIGEN_PROCESSING_AND_PRESENTATION	2	0.00329489
REACTOME_INSULIN_RECEPTOR_SIGNALLING_CASCADE	2	0.00329489
REACTOME_ACTIVATED_TAK1_MEDIATES_P38_MAPK_ACTIVATION	2	0.00329489
BIOCARTA_RANMS_PATHWAY	2	0.00329489
REACTOME_RNA_POL_III_CHAIN_ELONGATION	2	0.00329489
BIOCARTA_CCR3_PATHWAY	2	0.00329489
REACTOME_SCF_BETA_TRCP_MEDIATED_DEGRADATION_OF_EMI1	2	0.00329489
PID_PLK1_PATHWAY	2	0.00329489
BIOCARTA_SODD_PATHWAY	2	0.00329489
BIOCARTA_VEGF_PATHWAY	1	0.00164745
REACTOME_IRAK1_RECRUITS_IKK_COMPLEX	1	0.00164745
PID_IL2_STAT5PATHWAY	1	0.00164745
PID_ERBB2ERBB3PATHWAY	1	0.00164745
BIOCARTA_NO1_PATHWAY	1	0.00164745
REACTOME_ASSOCIATION_OF_TRIC_CCT_WITH_TARGET_PROTEINS_DURING_BIOSYNTHESIS	1	0.00164745
REACTOME_SHC1_EVENTS_IN_EGFR_SIGNALING	1	0.00164745
REACTOME_TRIGLYCERIDE_BIOSYNTHESIS	1	0.00164745
REACTOME_REGULATION_OF_INSULIN_SECRETION	1	0.00164745
REACTOME_REGULATION_OF_RHEB_GTPASE_ACTIVITY_BY_AMPK	1	0.00164745
BIOCARTA_GCR_PATHWAY	1	0.00164745
REACTOME_GAP_JUNCTION_ASSEMBLY	1	0.00164745
KEGG_FATTY_ACID_METABOLISM	1	0.00164745
BIOCARTA_ARENRF2_PATHWAY	1	0.00164745
PID_ARF6_TRAFFICKINGPATHWAY	1	0.00164745
REACTOME_PTM_GAMMA_CARBOXYLATION_HYPUSINE_FORMATION_AND_ARYLSULFATASE_ACTIVATION	1	0.00164745
REACTOME_G1_S_TRANSITION	1	0.00164745
REACTOME_IL_RECEPTOR_SHC_SIGNALING	1	0.00164745
ST_P38_MAPK_PATHWAY	1	0.00164745
PID_P38GAMMADELTAPATHWAY	1	0.00164745
KEGG_GLYCOSYLPHOSPHATIDYLINOSITOL_GPI_ANCHOR_BIOSYNTHESIS	1	0.00164745
REACTOME_INTERFERON_ALPHA_BETA_SIGNALING	1	0.00164745
REACTOME_L1CAM_INTERACTIONS	1	0.00164745
REACTOME_G1_PHASE	1	0.00164745
REACTOME_ENDOSOMAL_VACUOLAR_PATHWAY	1	0.00164745
REACTOME_N_GLYCAN_ANTENNAE_ELONGATION_IN_THE_MEDIAL_TRANS_GOLGI	1	0.00164745
KEGG_CARDIAC_MUSCLE_CONTRACTION	1	0.00164745
REACTOME_PROTEOLYTIC_CLEAVAGE_OF_SNARE_COMPLEX_PROTEINS	1	0.00164745
REACTOME_COLLAGEN_FORMATION	1	0.00164745
BIOCARTA_DNAFRAGMENT_PATHWAY	1	0.00164745
BIOCARTA_ERK5_PATHWAY	1	0.00164745
PID_ATR_PATHWAY	1	0.00164745
BIOCARTA_PAR1_PATHWAY	1	0.00164745
KEGG_REGULATION_OF_ACTIN_CYTOSKELETON	1	0.00164745
REACTOME_PLATELET_ACTIVATION_SIGNALING_AND_AGGREGATION	1	0.00164745
REACTOME_IONOTROPIC_ACTIVITY_OF_KAINATE_RECEPTORS	1	0.00164745
REACTOME_INNATE_IMMUNE_SYSTEM	1	0.00164745
REACTOME_TRANSPORT_OF_MATURE_MRNA_DERIVED_FROM_AN_INTRONLESS_TRANSCRIPT	1	0.00164745
KEGG_CIRCADIAN_RHYTHM_MAMMAL	1	0.00164745
PID_IL5_PATHWAY	1	0.00164745
REACTOME_M_G1_TRANSITION	1	0.00164745
PID_BETACATENIN_DEG_PATHWAY	1	0.00164745
REACTOME_ACTIVATED_NOTCH1_TRANSMITS_SIGNAL_TO_THE_NUCLEUS	1	0.00164745
BIOCARTA_RACCYCD_PATHWAY	1	0.00164745
REACTOME_SIGNALING_BY_PDGF	1	0.00164745
BIOCARTA_INSULIN_PATHWAY	1	0.00164745
BIOCARTA_ACTINY_PATHWAY	1	0.00164745
BIOCARTA_INTEGRIN_PATHWAY	1	0.00164745
REACTOME_AMYLOIDS	1	0.00164745
KEGG_SMALL_CELL_LUNG_CANCER	1	0.00164745
PID_DNAPK_PATHWAY	1	0.00164745
REACTOME_RAP1_SIGNALLING	1	0.00164745
REACTOME_P53_INDEPENDENT_G1_S_DNA_DAMAGE_CHECKPOINT	1	0.00164745
BIOCARTA_SET_PATHWAY	1	0.00164745
KEGG_ALANINE_ASPARTATE_AND_GLUTAMATE_METABOLISM	1	0.00164745
REACTOME_PPARA_ACTIVATES_GENE_EXPRESSION	1	0.00164745
REACTOME_DIABETES_PATHWAYS	1	0.00164745
REACTOME_GAMMA_CARBOXYLATION_TRANSPORT_AND_AMINO_TERMINAL_CLEAVAGE_OF_PROTEINS	1	0.00164745
REACTOME_MITOTIC_M_M_G1_PHASES	1	0.00164745
REACTOME_O_LINKED_GLYCOSYLATION_OF_MUCINS	1	0.00164745
REACTOME_RNA_POL_III_TRANSCRIPTION	1	0.00164745
REACTOME_METABOLISM_OF_NON_CODING_RNA	1	0.00164745
REACTOME_TRAFFICKING_OF_AMPA_RECEPTORS	1	0.00164745
PID_EPOPATHWAY	1	0.00164745
REACTOME_TRANSPORT_OF_INORGANIC_CATIONS_ANIONS_AND_AMINO_ACIDS_OLIGOPEPTIDES	1	0.00164745
PID_AURORA_A_PATHWAY	1	0.00164745
BIOCARTA_EIF4_PATHWAY	1	0.00164745
REACTOME_CONVERSION_FROM_APC_C_CDC20_TO_APC_C_CDH1_IN_LATE_ANAPHASE	1	0.00164745
ST_WNT_CA2_CYCLIC_GMP_PATHWAY	1	0.00164745
PID_P53REGULATIONPATHWAY	1	0.00164745
PID_CXCR4_PATHWAY	1	0.00164745
REACTOME_NUCLEOTIDE_EXCISION_REPAIR	1	0.00164745
REACTOME_MRNA_SPLICING	1	0.00164745
PID_CIRCADIANPATHWAY	1	0.00164745
PID_SYNDECAN_1_PATHWAY	1	0.00164745
BIOCARTA_SARS_PATHWAY	1	0.00164745
REACTOME_ACYL_CHAIN_REMODELLING_OF_PC	1	0.00164745
KEGG_VALINE_LEUCINE_AND_ISOLEUCINE_BIOSYNTHESIS	1	0.00164745
REACTOME_3_UTR_MEDIATED_TRANSLATIONAL_REGULATION	1	0.00164745
REACTOME_GLUCOSE_TRANSPORT	1	0.00164745
PID_TCRRASPATHWAY	1	0.00164745
PID_IFNGPATHWAY	1	0.00164745
BIOCARTA_PML_PATHWAY	1	0.00164745
REACTOME_IL_7_SIGNALING	1	0.00164745
REACTOME_SIGNALING_BY_ILS	1	0.00164745
PID_WNT_NONCANONICAL_PATHWAY	1	0.00164745
BIOCARTA_IL22BP_PATHWAY	1	0.00164745
REACTOME_VEGF_LIGAND_RECEPTOR_INTERACTIONS	1	0.00164745
REACTOME_INTEGRATION_OF_PROVIRUS	1	0.00164745
SIG_PIP3_SIGNALING_IN_B_LYMPHOCYTES	1	0.00164745
KEGG_TYPE_II_DIABETES_MELLITUS	1	0.00164745
PID_TCRJNKPATHWAY	1	0.00164745
REACTOME_NEF_MEDIATED_DOWNREGULATION_OF_MHC_CLASS_I_COMPLEX_CELL_SURFACE_EXPRESSION	1	0.00164745
KEGG_ARRHYTHMOGENIC_RIGHT_VENTRICULAR_CARDIOMYOPATHY_ARVC	1	0.00164745
REACTOME_E2F_MEDIATED_REGULATION_OF_DNA_REPLICATION	1	0.00164745
REACTOME_NEP_NS2_INTERACTS_WITH_THE_CELLULAR_EXPORT_MACHINERY	1	0.00164745
REACTOME_HOST_INTERACTIONS_OF_HIV_FACTORS	1	0.00164745
BIOCARTA_MPR_PATHWAY	1	0.00164745
REACTOME_HS_GAG_DEGRADATION	1	0.00164745
BIOCARTA_CXCR4_PATHWAY	1	0.00164745
KEGG_PYRUVATE_METABOLISM	1	0.00164745
PID_ARF_3PATHWAY	1	0.00164745
REACTOME_YAP1_AND_WWTR1_TAZ_STIMULATED_GENE_EXPRESSION	1	0.00164745
REACTOME_TRANSPORT_OF_RIBONUCLEOPROTEINS_INTO_THE_HOST_NUCLEUS	1	0.00164745
REACTOME_IMMUNOREGULATORY_INTERACTIONS_BETWEEN_A_LYMPHOID_AND_A_NON_LYMPHOID_CELL	1	0.00164745
KEGG_VIBRIO_CHOLERAE_INFECTION	1	0.00164745
BIOCARTA_CASPASE_PATHWAY	1	0.00164745
REACTOME_GPCR_DOWNSTREAM_SIGNALING	1	0.00164745
BIOCARTA_MCM_PATHWAY	1	0.00164745
KEGG_NOTCH_SIGNALING_PATHWAY	1	0.00164745
BIOCARTA_RB_PATHWAY	1	0.00164745
REACTOME_FACTORS_INVOLVED_IN_MEGAKARYOCYTE_DEVELOPMENT_AND_PLATELET_PRODUCTION	1	0.00164745
REACTOME_CHOLESTEROL_BIOSYNTHESIS	1	0.00164745
REACTOME_OXYGEN_DEPENDENT_PROLINE_HYDROXYLATION_OF_HYPOXIA_INDUCIBLE_FACTOR_ALPHA	1	0.00164745
BIOCARTA_GATA3_PATHWAY	1	0.00164745
REACTOME_ANTIGEN_PROCESSING_CROSS_PRESENTATION	1	0.00164745
PID_IL23PATHWAY	1	0.00164745
KEGG_GLYCEROPHOSPHOLIPID_METABOLISM	1	0.00164745
PID_HNF3APATHWAY	1	0.00164745
KEGG_GLYOXYLATE_AND_DICARBOXYLATE_METABOLISM	1	0.00164745
PID_BARD1PATHWAY	1	0.00164745
PID_MAPKTRKPATHWAY	1	0.00164745
SA_PTEN_PATHWAY	1	0.00164745
BIOCARTA_HIF_PATHWAY	1	0.00164745
REACTOME_HS_GAG_BIOSYNTHESIS	1	0.00164745
KEGG_SNARE_INTERACTIONS_IN_VESICULAR_TRANSPORT	1	0.00164745
BIOCARTA_AGPCR_PATHWAY	1	0.00164745
PID_ANGIOPOIETINRECEPTOR_PATHWAY	1	0.00164745
PID_LYMPHANGIOGENESIS_PATHWAY	1	0.00164745
PID_E2F_PATHWAY	1	0.00164745
REACTOME_P53_DEPENDENT_G1_DNA_DAMAGE_RESPONSE	1	0.00164745
PID_REELINPATHWAY	1	0.00164745
REACTOME_CREB_PHOSPHORYLATION_THROUGH_THE_ACTIVATION_OF_RAS	1	0.00164745
BIOCARTA_BARRESTIN_SRC_PATHWAY	1	0.00164745
REACTOME_CHONDROITIN_SULFATE_DERMATAN_SULFATE_METABOLISM	1	0.00164745
BIOCARTA_SKP2E2F_PATHWAY	1	0.00164745
KEGG_SELENOAMINO_ACID_METABOLISM	1	0.00164745
REACTOME_SHC_RELATED_EVENTS	1	0.00164745
PID_IL12_2PATHWAY	1	0.00164745
REACTOME_NUCLEOTIDE_BINDING_DOMAIN_LEUCINE_RICH_REPEAT_CONTAINING_RECEPTOR_NLR_SIGNALING_PATHWAYS	1	0.00164745
BIOCARTA_CARM1_PATHWAY	1	0.00164745
REACTOME_TOLL_RECEPTOR_CASCADES	1	0.00164745
REACTOME_RAS_ACTIVATION_UOPN_CA2_INFUX_THROUGH_NMDA_RECEPTOR	1	0.00164745
REACTOME_METABOLISM_OF_AMINO_ACIDS_AND_DERIVATIVES	1	0.00164745
PID_SYNDECAN_3_PATHWAY	1	0.00164745
REACTOME_MEMBRANE_TRAFFICKING	1	0.00164745
KEGG_AMYOTROPHIC_LATERAL_SCLEROSIS_ALS	1	0.00164745
KEGG_SPHINGOLIPID_METABOLISM	1	0.00164745
REACTOME_NEF_MEDIATES_DOWN_MODULATION_OF_CELL_SURFACE_RECEPTORS_BY_RECRUITING_THEM_TO_CLATHRIN_ADAPTERS	1	0.00164745
REACTOME_G_ALPHA_Z_SIGNALLING_EVENTS	1	0.00164745
REACTOME_GRB2_EVENTS_IN_ERBB2_SIGNALING	1	0.00164745
PID_HIF1APATHWAY	1	0.00164745
ST_ADRENERGIC	1	0.00164745
BIOCARTA_IGF1MTOR_PATHWAY	1	0.00164745
REACTOME_KERATAN_SULFATE_BIOSYNTHESIS	1	0.00164745
REACTOME_FRS2_MEDIATED_CASCADE	1	0.00164745
BIOCARTA_TPO_PATHWAY	1	0.00164745
BIOCARTA_TOB1_PATHWAY	1	0.00164745
REACTOME_PECAM1_INTERACTIONS	1	0.00164745
KEGG_GLYCOLYSIS_GLUCONEOGENESIS	1	0.00164745
BIOCARTA_STATHMIN_PATHWAY	1	0.00164745
REACTOME_NOTCH_HLH_TRANSCRIPTION_PATHWAY	1	0.00164745
PID_HIF2PATHWAY	1	0.00164745
REACTOME_DNA_REPLICATION	1	0.00164745
PID_THROMBIN_PAR4_PATHWAY	1	0.00164745
REACTOME_CHONDROITIN_SULFATE_BIOSYNTHESIS	1	0.00164745
REACTOME_IL_2_SIGNALING	1	0.00164745
KEGG_STARCH_AND_SUCROSE_METABOLISM	1	0.00164745
PID_AVB3_INTEGRIN_PATHWAY	1	0.00164745
REACTOME_APC_C_CDH1_MEDIATED_DEGRADATION_OF_CDC20_AND_OTHER_APC_C_CDH1_TARGETED_PROTEINS_IN_LATE_MITOSIS_EARLY_G1	1	0.00164745
REACTOME_EARLY_PHASE_OF_HIV_LIFE_CYCLE	1	0.00164745
BIOCARTA_CTL_PATHWAY	1	0.00164745
KEGG_ETHER_LIPID_METABOLISM	1	0.00164745
BIOCARTA_HER2_PATHWAY	1	0.00164745
PID_TXA2PATHWAY	1	0.00164745
REACTOME_KINESINS	1	0.00164745
REACTOME_DAG_AND_IP3_SIGNALING	1	0.00164745
REACTOME_REGULATION_OF_WATER_BALANCE_BY_RENAL_AQUAPORINS	1	0.00164745
REACTOME_TRANSPORT_OF_MATURE_TRANSCRIPT_TO_CYTOPLASM	1	0.00164745
BIOCARTA_IL2RB_PATHWAY	1	0.00164745
PID_S1P_S1P2_PATHWAY	1	0.00164745
REACTOME_ASSEMBLY_OF_THE_PRE_REPLICATIVE_COMPLEX	1	0.00164745
REACTOME_SHC_MEDIATED_SIGNALLING	1	0.00164745
KEGG_PROGESTERONE_MEDIATED_OOCYTE_MATURATION	1	0.00164745
REACTOME_REGULATION_OF_PYRUVATE_DEHYDROGENASE_PDH_COMPLEX	1	0.00164745
ST_ERK1_ERK2_MAPK_PATHWAY	1	0.00164745
REACTOME_GLYCOSPHINGOLIPID_METABOLISM	1	0.00164745
REACTOME_CLEAVAGE_OF_GROWING_TRANSCRIPT_IN_THE_TERMINATION_REGION_	1	0.00164745
REACTOME_INFLUENZA_LIFE_CYCLE	1	0.00164745
REACTOME_ACTIVATION_OF_BH3_ONLY_PROTEINS	1	0.00164745
PID_PTP1BPATHWAY	1	0.00164745
REACTOME_SMOOTH_MUSCLE_CONTRACTION	1	0.00164745
BIOCARTA_VDR_PATHWAY	1	0.00164745
KEGG_PEROXISOME	1	0.00164745
BIOCARTA_EIF2_PATHWAY	1	0.00164745
REACTOME_NUCLEAR_SIGNALING_BY_ERBB4	1	0.00164745
REACTOME_MITOTIC_G2_G2_M_PHASES	1	0.00164745
REACTOME_CELL_DEATH_SIGNALLING_VIA_NRAGE_NRIF_AND_NADE	1	0.00164745
REACTOME_TRANSMEMBRANE_TRANSPORT_OF_SMALL_MOLECULES	1	0.00164745
REACTOME_AKT_PHOSPHORYLATES_TARGETS_IN_THE_CYTOSOL	1	0.00164745
ST_FAS_SIGNALING_PATHWAY	1	0.00164745
REACTOME_ARMS_MEDIATED_ACTIVATION	1	0.00164745
REACTOME_ENDOSOMAL_SORTING_COMPLEX_REQUIRED_FOR_TRANSPORT_ESCRT	1	0.00164745
BIOCARTA_MITOCHONDRIA_PATHWAY	1	0.00164745
KEGG_NUCLEOTIDE_EXCISION_REPAIR	1	0.00164745
REACTOME_SHC1_EVENTS_IN_ERBB4_SIGNALING	1	0.00164745
REACTOME_SIGNALING_BY_INSULIN_RECEPTOR	1	0.00164745
ST_DIFFERENTIATION_PATHWAY_IN_PC12_CELLS	1	0.00164745
REACTOME_CD28_CO_STIMULATION	1	0.00164745
REACTOME_G_PROTEIN_ACTIVATION	1	0.00164745
REACTOME_MTORC1_MEDIATED_SIGNALLING	1	0.00164745
PID_RETINOIC_ACID_PATHWAY	1	0.00164745
PID_IL8CXCR1_PATHWAY	1	0.00164745
KEGG_HEDGEHOG_SIGNALING_PATHWAY	1	0.00164745
REACTOME_TRAF3_DEPENDENT_IRF_ACTIVATION_PATHWAY	1	0.00164745
PID_S1P_S1P4_PATHWAY	1	0.00164745
REACTOME_PIP3_ACTIVATES_AKT_SIGNALING	1	0.00164745
REACTOME_DOUBLE_STRAND_BREAK_REPAIR	1	0.00164745
REACTOME_PERK_REGULATED_GENE_EXPRESSION	1	0.00164745
REACTOME_REGULATION_OF_IFNA_SIGNALING	1	0.00164745
REACTOME_AUTODEGRADATION_OF_THE_E3_UBIQUITIN_LIGASE_COP1	1	0.00164745
BIOCARTA_MYOSIN_PATHWAY	1	0.00164745
REACTOME_JNK_C_JUN_KINASES_PHOSPHORYLATION_AND_ACTIVATION_MEDIATED_BY_ACTIVATED_HUMAN_TAK1	1	0.00164745
PID_IL2_1PATHWAY	1	0.00164745
PID_FRA_PATHWAY	1	0.00164745
KEGG_THYROID_CANCER	1	0.00164745
REACTOME_ROLE_OF_SECOND_MESSENGERS_IN_NETRIN1_SIGNALING	1	0.00164745
REACTOME_REGULATION_OF_INSULIN_SECRETION_BY_GLUCAGON_LIKE_PEPTIDE1	1	0.00164745
REACTOME_ER_PHAGOSOME_PATHWAY	1	0.00164745
REACTOME_SIGNALING_BY_WNT	1	0.00164745
REACTOME_ADP_SIGNALLING_THROUGH_P2RY1	1	0.00164745
ST_G_ALPHA_I_PATHWAY	1	0.00164745
REACTOME_TRAF6_MEDIATED_IRF7_ACTIVATION_IN_TLR7_8_OR_9_SIGNALING	1	0.00164745
REACTOME_TETRAHYDROBIOPTERIN_BH4_SYNTHESIS_RECYCLING_SALVAGE_AND_REGULATION	1	0.00164745
REACTOME_INTERACTIONS_OF_VPR_WITH_HOST_CELLULAR_PROTEINS	1	0.00164745
KEGG_ENDOMETRIAL_CANCER	1	0.00164745
REACTOME_SIGNALING_BY_FGFR_MUTANTS	1	0.00164745
REACTOME_ACTIVATION_OF_CHAPERONE_GENES_BY_XBP1S	1	0.00164745
KEGG_BUTANOATE_METABOLISM	1	0.00164745
REACTOME_HOMOLOGOUS_RECOMBINATION_REPAIR_OF_REPLICATION_INDEPENDENT_DOUBLE_STRAND_BREAKS	1	0.00164745
REACTOME_INFLAMMASOMES	1	0.00164745
REACTOME_SIGNAL_REGULATORY_PROTEIN_SIRP_FAMILY_INTERACTIONS	1	0.00164745
BIOCARTA_GLEEVEC_PATHWAY	1	0.00164745
REACTOME_MAP_KINASE_ACTIVATION_IN_TLR_CASCADE	1	0.00164745
REACTOME_NFKB_ACTIVATION_THROUGH_FADD_RIP1_PATHWAY_MEDIATED_BY_CASPASE_8_AND10	1	0.00164745
PID_AURORA_B_PATHWAY	1	0.00164745
REACTOME_BOTULINUM_NEUROTOXICITY	1	0.00164745
KEGG_BASAL_TRANSCRIPTION_FACTORS	1	0.00164745
REACTOME_SYNTHESIS_OF_DNA	1	0.00164745
REACTOME_RNA_POL_I_RNA_POL_III_AND_MITOCHONDRIAL_TRANSCRIPTION	1	0.00164745
REACTOME_P75_NTR_RECEPTOR_MEDIATED_SIGNALLING	1	0.00164745
REACTOME_GLOBAL_GENOMIC_NER_GG_NER	1	0.00164745
PID_P38_MKK3_6PATHWAY	1	0.00164745
ST_JNK_MAPK_PATHWAY	1	0.00164745
REACTOME_ASPARAGINE_N_LINKED_GLYCOSYLATION	1	0.00164745
BIOCARTA_NKCELLS_PATHWAY	1	0.00164745
REACTOME_GAP_JUNCTION_DEGRADATION	1	0.00164745
REACTOME_PI3K_AKT_ACTIVATION	1	0.00164745
REACTOME_FORMATION_OF_INCISION_COMPLEX_IN_GG_NER	1	0.00164745
KEGG_ABC_TRANSPORTERS	1	0.00164745
REACTOME_G_BETA_GAMMA_SIGNALLING_THROUGH_PI3KGAMMA	1	0.00164745
REACTOME_OTHER_SEMAPHORIN_INTERACTIONS	1	0.00164745
PID_CD8TCRDOWNSTREAMPATHWAY	1	0.00164745
